# Supplementary material for: Cluster analysis of networks generated through homology: automatic identification of important protein communities involved in cancer metastasis
Source: PubMed Central journal article supplement (PMC1363365; doi:10.1186/1471-2105-7-2), 2006-01-06
Supplement: 1471-2105-7-2-S1.pdf [file 1471-2105-7-2-S1.pdf]

| Sequence ID                    | Gene name | Description                                                                       |
|--------------------------------|-----------|-----------------------------------------------------------------------------------|
| <b>Community 0: TGF-beta</b>   |           |                                                                                   |
| NP_036722                      | Inha      | inhibin alpha                                                                     |
| NP_036907                      | Tgfr1     | transforming growth factor, beta receptor 1                                       |
| NP_036959                      | Bmp4      | bone morphogenetic protein 4                                                      |
| NP_037234                      | Fkbp1a    | FK506-binding protein 1a                                                          |
| NP_037239                      | Bmp6      | bone morphogenetic protein 6                                                      |
| NP_037306                      | Tgfb3     | transforming growth factor, beta 3                                                |
| NP_058824                      | Inhba     | inhibin beta A                                                                    |
| NP_058874                      | Bmp2      | bone morphogenetic protein 2                                                      |
| NP_058952                      | Tgfr3     | transforming growth factor, beta receptor 3                                       |
| NP_058973                      | Ap1b1     | adaptor protein complex AP-1, beta 1 subunit                                      |
| NP_059052                      | Hpcal1    | neural visinin-like Ca <sup>2+</sup> -binding protein type 3                      |
| NP_067589                      | Tgfb1     | transforming growth factor, beta 1                                                |
| NP_071886                      | Acreq     | activin A receptor type II-like 1                                                 |
| NP_077342                      | Freq      | neuronal calcium sensor-1                                                         |
| NP_077812                      | Acvr1     | activin type I receptor                                                           |
| NP_110476                      | Bmpr1a    | bone morphogenetic protein receptor, type 1A                                      |
| NP_112393                      | Tgfb2     | transforming growth factor, beta 2                                                |
| NP_112394                      | Tgfr2     | transforming growth factor-b type II receptor                                     |
| NP_954700                      | Acvr1b    | activin A receptor, type 1B                                                       |
| XP_217147                      |           | similar to mmDj4                                                                  |
| XP_217297                      |           | activin receptor IIB                                                              |
| XP_217409                      |           | similar to Bone morphogenetic protein type II receptor                            |
| XP_227759                      |           | similar to CFK-43a=bone morphogenetic protein binding ser/thr kinase receptor     |
| XP_232168                      |           | similar to DNA replication licensing factor MCM2                                  |
| XP_342432                      |           | activin receptor IIA                                                              |
| XP_342592                      |           | bone morphogenetic protein 7                                                      |
| XP_345647                      |           | similar to growth/differentiation factor 7                                        |
| <b>Community 1: Proteasome</b> |           |                                                                                   |
| NP_001005875                   | Psmd12    | proteasome 26S non-ATPase subunit 12                                              |
| NP_001008218                   | Psma7     | proteasome (prosome, macropain) subunit, alpha type 7                             |
| NP_001008282                   | Psmd3     | proteasome 26S non-ATPase subunit 3                                               |
| NP_001008302                   | Usp14     | ubiquitin specific protease 14                                                    |
| NP_058736                      | Ppp2cb    | protein phosphatase 2a, catalytic subunit, beta isoform                           |
| NP_058796                      | Plk1      | polo-like kinase 1                                                                |
| NP_058974                      | Psma1     | proteasome (prosome, macropain) subunit, alpha type 1                             |
| NP_058975                      | Psma2     | proteasome (prosome, macropain) subunit, alpha type 2                             |
| NP_058976                      | Psma3     | proteasome (prosome, macropain) subunit, alpha type 3                             |
| NP_058977                      | Psma4     | proteasome (prosome, macropain) subunit, alpha type 4                             |
| NP_058979                      | Psma6     | proteasome (prosome, macropain) subunit, alpha type 6                             |
| NP_058980                      | Psmb2     | proteasome (prosome, macropain) subunit, beta type 2                              |
| NP_058981                      | Psmb3     | proteasome (prosome, macropain) subunit, beta type 3                              |
| NP_112411                      | Sug1      | proteasomal ATPase (SUG1)                                                         |
| NP_112621                      | Psmd4     | proteasome (prosome, macropain) 26S subunit, non-ATPase, 4                        |
| NP_113817                      | Psmb4     | proteasome (prosome, macropain) subunit, beta type 4                              |
| NP_150239                      | Psmd2     | proteasome (prosome, macropain) 26S subunit, ATPase 2                             |
| NP_476440                      | Psmb6     | proteasome (prosome, macropain) subunit, beta type 6                              |
| NP_476463                      | Psmd4     | proteasome 26S ATPase subunit 4                                                   |
| NP_942025                      | MGC72968  | proteasome, 26S, non-ATPase regulatory subunit 6                                  |
| XP_213456                      |           | similar to Protein translation factor SUI1 homolog                                |
| XP_215745                      |           | similar to 26S proteasome-associated pad1 homolog                                 |
| XP_218424                      |           | similar to nucleotide excision repair protein                                     |
| XP_220754                      |           | similar to 26S proteasome non-ATPase regulatory subunit 11                        |
| XP_224534                      |           | similar to karyopherin beta 3; Ran.GTP binding protein 5; importin beta-3 subunit |
| XP_226439                      |           | similar to 26S proteasome non-ATPase regulatory subunit 7                         |
| XP_233467                      |           | similar to cytidine 5-triphosphate synthase                                       |
| XP_341315                      |           | proteasome (prosome, macropain) subunit, beta type 5                              |
| XP_342114                      |           | similar to Periodic tryptophan protein 2 homolog                                  |

XP\_344650 similar to Proteasome subunit alpha type 7-like  
 XP\_344977 similar to 26S proteasome subunit p40.5

### Community 2: Mitotic spindle checkpoint

---

|              |        |                                                                  |
|--------------|--------|------------------------------------------------------------------|
| NP_001008331 | Polr1c | RNA polymerase I subunit                                         |
| NP_036942    | Sycp1  | synaptonemal complex protein 1                                   |
| NP_071582    | Rad50  | RAD50 homolog                                                    |
| NP_071790    | Pmpcb  | mitochondrial processing peptidase beta                          |
| NP_113771    | Cspg6  | chondroitin sulfate proteoglycan 6                               |
| NP_113871    | Smc11l | SMC1 structural maintenance of chromosomes 1-like 1              |
| NP_114009    | Plk2   | polo-like kinase 2                                               |
| NP_703201    | Rnf40  | ring finger protein 40                                           |
| NP_955795    | Cdk2   | cyclin-dependent kinase 2                                        |
| XP_215573    |        | similar to SMC4 protein                                          |
| XP_218574    |        | similar to BC013491 protein                                      |
| XP_222860    |        | similar to NUF2R protein                                         |
| XP_233108    |        | similar to stromal antigen 2                                     |
| XP_233337    |        | similar to epidermal growth factor receptor pathway substrate 15 |
| XP_235267    |        | similar to pokeweed agglutinin-binding protein                   |
| XP_342838    |        | similar to SMC2 protein                                          |

### Community 3: Myosin

---

|              |        |                                                                                   |
|--------------|--------|-----------------------------------------------------------------------------------|
| NP_001009268 | Actr2  | actin-related protein 2                                                           |
| NP_058936    | Myh7   | myosin heavy chain, polypeptide 7                                                 |
| NP_068640    | Ctnn   | cortactin isoform B                                                               |
| NP_112406    | Actb   | cytoplasm beta-actin                                                              |
| NP_112408    | Arpc1a | suppressor of profilin/p41 of actin-related complex 2/3                           |
| NP_446372    | Trip10 | thyroid hormone receptor interactor 10                                            |
| NP_446438    | Myo1b  | myosin Ib                                                                         |
| NP_476540    | Waspip | Wiskott-Aldrich syndrome protein interacting protein                              |
| NP_775124    | Myo1e  | myosin IE                                                                         |
| NP_955795    | Cdk2   | cyclin-dependent kinase 2                                                         |
| XP_217432    |        | similar to actin related protein 2/3 complex subunit 2; ARP2/3 complex subunit 34 |
| XP_218617    |        | similar to nonmuscle myosin heavy chain                                           |
| XP_228784    |        | similar to Wiskott-Aldrich Syndrome Protein                                       |
| XP_233945    |        | similar to mKIAA1256 protein                                                      |
| XP_238365    |        | similar to actin related protein 2/3 complex, subunit 4                           |
| XP_239604    |        | similar to GluR-delta2 philic-protein                                             |
| XP_340818    |        | myosin, heavy polypeptide 4                                                       |
| XP_341113    |        | actin-related protein 3 homolog                                                   |
| XP_343046    |        | similar to Sh3yl1                                                                 |

### Community 4: Intracellular signaling cascade

---

|              |        |                                                                  |
|--------------|--------|------------------------------------------------------------------|
| NP_001002289 | Fut8   | fucosyltransferase 8 (alpha (1,6) fucosyltransferase)            |
| NP_001004081 | Mpi    | mannose phosphate isomerase                                      |
| NP_001008725 | Il6st  | interleukin 6 signal transducer                                  |
| NP_036645    | Bdnf   | brain derived neurotrophic factor                                |
| NP_036742    | Ngfr   | nerve growth factor receptor, fast                               |
| NP_036863    | Ntrk2  | neurotrophic tyrosine kinase, receptor, type 2                   |
| NP_036887    | Fyn    | fyn proto-oncogene                                               |
| NP_036921    | Dpp4   | dipeptidylpeptidase 4                                            |
| NP_036978    | Fgf1   | fibroblast growth factor 1                                       |
| NP_037101    | Irs1   | insulin receptor substrate 1                                     |
| NP_037137    | Pik3r  | phosphatidylinositol 3-kinase, regulatory subunit, polypeptide 1 |
| NP_037194    | Kdr    | kinase insert domain protein receptor                            |
| NP_037213    | Ptk2   | PTK2 protein tyrosine kinase 2                                   |
| NP_037220    | Ptpn11 | protein tyrosine phosphatase, non-receptor type 11               |
| NP_037319    | Plcg1  | phospholipase C, gamma 1                                         |
| NP_058762    | Ptn    | pleiotrophin                                                     |
| NP_058767    | Insr   | insulin receptor                                                 |
| NP_058790    | Ghr    | growth hormone receptor                                          |

|           |            |                                                                             |
|-----------|------------|-----------------------------------------------------------------------------|
| NP_058864 | Plcg2      | phospholipase C, gamma 2                                                    |
| NP_059037 | Lipf       | lipase, gastric                                                             |
| NP_062121 | Ntrk3      | neural receptor protein-tyrosine kinase                                     |
| NP_062178 | Fgf2       | fibroblast growth factor 2                                                  |
| NP_067600 | Ntrk1      | trk precursor                                                               |
| NP_071549 | Pik3r3     | phosphatidylinositol 3-kinase p55 subunit                                   |
| NP_071963 | Arf1       | ADP-ribosylation factor 1                                                   |
| NP_110483 | Lrrn3      | leucine rich repeat protein 3, neuronal                                     |
| NP_110486 | Mdk        | midkine                                                                     |
| NP_112335 | Ntf3       | neurotrophin 3                                                              |
| NP_112624 | Cdh1       | cadherin 1                                                                  |
| NP_113702 | Jak2       | Janus kinase 2                                                              |
| NP_113811 | Grb14      | growth factor receptor bound protein 14                                     |
| NP_434694 | Igf1r      | insulin-like growth factor 1 receptor                                       |
| NP_445775 | Degs       | degenerative spermatocyte homolog                                           |
| NP_445809 | Catnb      | beta-catenin                                                                |
| NP_445855 | Grb7       | growth factor receptor binding protein GRB7                                 |
| NP_476547 | Ncr1       | lymphocyte antigen 94 (mouse) homolog (activating NK-receptor; NK-p46)      |
| NP_542419 | Plcd4      | phospholipase C, delta 4                                                    |
| NP_604451 | Sh2bpsm1   | SH2-B PH domain containing signaling mediator 1                             |
| NP_612516 | Ptpnc      | protein tyrosine phosphatase, receptor type, C                              |
| NP_665725 | Cyp3a18    | cytochrome P450, 3a18                                                       |
| NP_665886 | Socs1      | suppressor of cytokine signaling 1                                          |
| NP_849197 | Igf1       | insulin-like growth factor 1                                                |
| XP_213997 | Ptpn13     | similar to protein Tyr phosphatase, non-receptor type 13                    |
| XP_214050 | Lap3_pred  | leucine aminopeptidase 3 (predicted)                                        |
| XP_217246 | Nck1_pred  | similar to non-catalytic region of tyrosine kinase adaptor protein 1        |
| XP_217250 | Ephb1      | PREDICTED: Eph receptor B1                                                  |
| XP_218346 | Axl_pred   | now NP_001013165. AXL receptor tyrosine kinase (predicted)                  |
| XP_221036 | LOC303606  | now NP_001013996.hypothetical protein                                       |
| XP_224344 | Dok2_pred  | similar to docking protein Dok-R                                            |
| XP_226503 | LOC307845  | similar to hypothetical protein BC002770                                    |
| XP_227525 | Ngfb       | similar to nerve growth factor beta chain precursor - multimammate rat      |
| XP_231137 | Abl1       | similar to Abl1 protein Proto-oncogene tyrosine-protein kinase ABL1         |
| XP_232763 | Lck        | lymphocyte-specific protein tyrosine kinase                                 |
| XP_233522 | LOC298528  | similar to Ephrin type-A receptor 10                                        |
| XP_235164 | Frs2_pred  | similar to fibroblast growth factor receptor substrate 2                    |
| XP_236628 | Mst1r_pred | similar to hepatocyte growth factor-like protein receptor                   |
| XP_341110 | Ptpn4      | similar to testis-enriched protein tyrosine phosphatase                     |
| XP_342283 | Shc1       | now NP_445969 SHC (Src homology 2 domain-containing) transforming protein 1 |
| XP_342864 | Tek        | similar to TIE-2=receptor-like tyrosine kinase                              |
| XP_343062 | LOC362737  | similar to RIKEN cDNA D930036F22 gene                                       |
| XP_347256 |            | similar to met proto-onco                                                   |

#### Community 5: EGF-like domain containing proteins

---

|           |        |                                             |
|-----------|--------|---------------------------------------------|
| NP_058928 | Ptgs2  | prostaglandin-endoperoxide synthase 2       |
| NP_062020 | Jag1   | jagged 1                                    |
| NP_077334 | Notch2 | notch gene homolog 2                        |
| NP_446196 | Dlk1   | delta-like 1 homolog                        |
| NP_620192 | Pou3f3 | POU domain, class 3, transcription factor 3 |
| NP_942048 | Rpl3   | ribosomal protein L3                        |
| XP_232595 |        | similar to Rbpsuh protein                   |
| XP_241375 |        | similar to N-terminal acetyltransferase 1   |
| XP_343120 |        | jagged 2                                    |

#### Community 6: Endo/exonuclease

---

|              |       |                                                                                   |
|--------------|-------|-----------------------------------------------------------------------------------|
| NP_001008383 | Cnot8 | similar to CCR4-NOT transcription complex, subunit 8 (CAF1-like protein)          |
| NP_001009357 | Rqcd1 | RCD1 required for cell differentiation1 homolog                                   |
| XP_216889    |       | similar to CCR4-NOT transcription complex, subunit 2; NOT2 (neg. reg. of transcr) |
| XP_218062    |       | similar to LATS homolog 1                                                         |
| XP_218187    |       | similar to CCR4-NOT transcription complex, subunit 3                              |

XP\_224583 similar to CG31759-PA endo/exonuclease activity  
 XP\_226233 similar to KIAA1007 protein; adrenal gland protein AD-005  
 XP\_231603 similar to potential transcriptional repressor Not4hp  
 XP\_341192 similar to Hypothetical protein 4932442K20Rik

#### Community 7: Nucleocytoplasm transport

---

|           |        |                                                                                   |
|-----------|--------|-----------------------------------------------------------------------------------|
| NP_058759 | Kpnb1  | karyopherin (importin) beta 1                                                     |
| NP_059057 | Nup54  | nucleoporin 54kDa                                                                 |
| NP_445891 | Ran    | RAN, member RAS oncogene family                                                   |
| NP_446074 | Pom121 | nucleus pore membrane glycoprotein 121 kD                                         |
| NP_703206 | Krt1-9 | keratin complex 1, acidic, gene 9                                                 |
| NP_942021 | Kpna1  | karyopherin alpha 1 (importin alpha 5)                                            |
| XP_214639 |        | similar to RIKEN cDNA 2410008G02                                                  |
| XP_218620 |        | similar to nucleus pore glycoprotein p62 (62 kDa nucleoporin)                     |
| XP_224534 |        | similar to karyopherin beta 3; Ran_GTP binding protein 5; importin beta-3 subunit |
| XP_341509 |        | nucleoporin 153kD                                                                 |

#### Community 8: Cell cycle/cytokinesis

---

|           |         |                                                                                     |
|-----------|---------|-------------------------------------------------------------------------------------|
| NP_037027 | Adk     | adenosine kinase                                                                    |
| NP_037309 | Got2    | glutamate oxaloacetate transaminase 2                                               |
| NP_072138 | Sept7   | CDC10 (cell division cycle 10, S.cerevisiae, homolog)                               |
| NP_076481 | Prkaa2  | AMP-activated protein kinase alpha 2 catalytic subunit                              |
| NP_114025 | Sept9   | septin 9                                                                            |
| NP_446023 | Rgpr    | regucalcin gene promotor region related protein                                     |
| NP_446383 | Gp1bb   | glycoprotein Ib (platelet), beta polypeptide                                        |
| NP_476489 | Sept2   | septin 2                                                                            |
| NP_620184 | Gorasp2 | golgi reassembly stacking protein 2                                                 |
| NP_787032 | Eef1a1  | eukaryotic translation elongation factor 1 alpha 1                                  |
| XP_213393 |         | similar to CGI-125 protein                                                          |
| XP_213413 |         | similar to H5                                                                       |
| XP_213922 |         | similar to Brain protein 44 (0-44 protein)                                          |
| XP_216170 |         | similar to Hypothetical protein MGC59076                                            |
| XP_217147 |         | similar to mmDj4                                                                    |
| XP_219498 |         | similar to serine/threonine kinase 29                                               |
| XP_223227 |         | similar to hypothetical protein FLJ10849                                            |
| XP_231118 |         | similar to kynurenine aminotransferase/glutamine transaminase K                     |
| XP_234516 |         | similar to Cyclin K                                                                 |
| XP_340794 |         | similar to TBC1 domain, member 8; BUB2-like protein 1; vasc. Rab-GAP/TBC-containing |
| XP_343156 |         | similar to protein inhibitor of activated STAT gamma                                |
| XP_343275 |         | similar to myosin phosphatase targeting subunit 3 MYPT3                             |

#### Community 9: Nuclear hormone receptors

---

|           |       |                                                                              |
|-----------|-------|------------------------------------------------------------------------------|
| NP_036787 | Sp1   | sp1 transcription factor                                                     |
| NP_036804 | Thrb  | thyroid hormone receptor beta                                                |
| NP_036937 | Rxra  | retinoid X receptor alpha                                                    |
| NP_071516 | Hnf4a | hepatocyte nucleus factor 4 alpha                                            |
| NP_077335 | Hif1a | hypoxia inducible factor 1, alpha subunit                                    |
| NP_077364 | Nr4a1 | nucleus receptor subfamily 4, group A, member 1                              |
| NP_112392 | Nr2f1 | nucleus receptor subfamily 2, group F, member 1                              |
| NP_113815 | Nr1h3 | nucleus receptor subfamily 1, group H, member 3                              |
| NP_446294 | Mapk1 | mitogen activated protein kinase 1                                           |
| NP_695209 | Cops2 | COP9 (constitutive photomorphogenic) homolog, subunit 2                      |
| XP_216720 |       | similar to Thyroid transcription factor 1 (Thyroid nucleus factor 1) (TTF-1) |
| XP_226076 |       | similar to putative WDC146                                                   |
| XP_233944 |       | similar to nucleus receptor co-activator                                     |

#### Community 10: Sarcoglycans

---

|              |      |                              |
|--------------|------|------------------------------|
| NP_001006994 | Sgcg | gamma sarcoglycan            |
| NP_036830    | Dmd  | dystrophin isoform Dp71a     |
| XP_213891    |      | similar to abnormal spindle  |
| XP_220884    |      | similar to alpha-sarcoglycan |

XP\_223355 similar to beta-sarcoglycan

#### Community 11: Karyopherins

---

|           |        |                                                                          |
|-----------|--------|--------------------------------------------------------------------------|
| NP_037347 | Akr7a3 | aldo-keto reductase family 7, member A3 (aflatoxin aldehyde reductase)   |
| NP_058759 | Kpnb1  | karyopherin (importin) beta 1                                            |
| NP_058999 | Kcnab1 | potassium voltage-gated channel, shaker-related subfamily, beta member 1 |
| NP_059000 | Kcnab2 | potassium voltage-gated channel, shaker-related subfamily, beta member 2 |
| NP_942021 | Kpna1  | karyopherin alpha 1 (importin alpha 5)                                   |

#### Community 12: Hypoxia inducible factor

---

|           |       |                                                     |
|-----------|-------|-----------------------------------------------------|
| NP_077335 | Hif1a | hypoxia inducible factor 1, alpha subunit           |
| NP_077338 | Arntl | aryl hydrocarbon receptor nucleus translocator-like |
| XP_234728 |       | similar to Hspca protein                            |
| XP_234791 |       | similar to heat shock protein 84 - mouse            |

#### Community 13: Peroxisomal proteins

---

|           |       |                                                            |
|-----------|-------|------------------------------------------------------------|
| NP_742060 | Pex14 | peroxisomal membrane anchor protein                        |
| XP_218778 |       | similar to peroxisomal PTS2 receptor                       |
| XP_223684 |       | similar to Peroxisomal membrane protein PEX13 (Peroxin-13) |
| XP_232343 |       | similar to Pex5 protein                                    |

#### Community 14: Cell cycle regulation

---

|              |           |                                                                                    |
|--------------|-----------|------------------------------------------------------------------------------------|
| NP_001009470 | MGC108931 | similar to cyclin B2                                                               |
| NP_741990    | Cdc20     | cell division cycle 20 homolog                                                     |
| NP_955795    | Cdk2      | cyclin-dependent kinase 2                                                          |
| XP_213222    |           | similar to membrane-associated tyrosine-and threonine-spec. cdc2-inhibitory kinase |
| XP_214152    |           | similar to cyclin-dependent kinase inhibitor 3; CDK2-assoc. dual spec. phosphatase |
| XP_235722    |           | similar to cell division cycle 2 homolog 2; cell division cycle 2-like 2           |

#### Community 15: VEGF

---

|           |       |                                       |
|-----------|-------|---------------------------------------|
| NP_037194 | Kdr   | kinase insert domain protein receptor |
| NP_113949 | Figf  | c-fos induced growth factor           |
| NP_114024 | Vegfa | vascular endothelial growth factor    |
| NP_446047 | Pgf   | placental growth factor               |
| NP_446105 | Vegfc | vascular endothelial growth factor C  |

#### Community 16: JAK/STAT cascade

---

|           |        |                                                     |
|-----------|--------|-----------------------------------------------------|
| NP_058790 | Ghr    | growth hormone receptor                             |
| NP_071775 | Stat5b | signal transducer and activator of transcription 5B |
| NP_113702 | Jak2   | Janus kinase 2                                      |
| NP_116001 | Stat1  | signal transducer and activator of transcription 1  |

#### Community 17: Karyopherin docking complex

---

|           |       |                                                                                      |
|-----------|-------|--------------------------------------------------------------------------------------|
| NP_942021 | Kpna1 | karyopherin alpha 1 (importin alpha 5)                                               |
| XP_215550 |       | similar to polymyositis scleroderma overlap syndrome (PM-SCL) antigen 1 a            |
| XP_216949 |       | similar to putative exosome complex exonuclease RRP41                                |
| XP_218343 |       | similar to DNA segment, Chr 7, Wayne State University 180, expressed                 |
| XP_233673 |       | similar to P100 polymyositis-scleroderma overlap syndrome assoc. autoantigen homolog |

#### Community 18: NF-kappaB regulation

---

|           |       |                                                                             |
|-----------|-------|-----------------------------------------------------------------------------|
| NP_445807 | Ikbkb | inhibitor of kappa light polypeptide gene enhancer in B-cells, kinase beta  |
| NP_954534 | Ikbkg | inhibitor of kappa light polypeptide gene enhancer in B-cells, kinase gamma |
| XP_219857 |       | similar to conserved helix-loop-helix ubiquitous kinase                     |
| XP_234728 |       | similar to Hspca protein                                                    |
| XP_234791 |       | similar to heat shock protein 84 - mouse                                    |
| XP_340919 |       | similar to NF-kappaB inducing kinase                                        |

#### Community 19: Calmodulin

---

|           |        |                                                                                        |
|-----------|--------|----------------------------------------------------------------------------------------|
| NP_036650 | Calm3  | calmodulin 3                                                                           |
| NP_037220 | Ptpn11 | protein tyrosine phosphatase, non-receptor type 11                                     |
| XP_213368 |        | similar to Eukaryotic translation initiation factor 5A (eIF-5A) (eIF-4D) (Rev-binding) |

XP\_214050 similar to leucine aminopeptidase  
 XP\_341110 similar to testis-enriched protein tyrosine phosphatase

### Community 20: Actinins

---

NP\_112267 Actn1 actinin, alpha 1  
 NP\_113863 Actn4 alpha actinin 4  
 NP\_653346 Gpsm1 G-protein signalling modulator 1 (AGS3-like, *C. elegans*)  
 XP\_214499 similar to actinin, alpha 2  
 XP\_216586 similar to Msx-2 interacting nucleus target protein

### Community 21: ATP transporter proteins

---

NP\_036686 Eno1 enolase 1, alpha  
 NP\_445954 Abcg1 ATP-binding cassette, sub-family G (WHITE), member 1  
 XP\_214583 similar to grp75  
 XP\_341267 similar to polynucleotide phosphorylase-like protein

### Community 22: Tubulin proteins

---

NP\_036942 Sycp1 synaptonemal complex protein 1  
 NP\_112286 Dbn1 drebrin 1  
 NP\_665721 Tubg1 tubulin, gamma 1  
 NP\_954534 Ikbkg inhibitor of kappa light polypeptide gene enhancer in B-cells, kinase gamma  
 XP\_215080 similar to RIKEN cDNA 3230401O13  
 XP\_219470 similar to tubulin, gamma complex associated protein 2  
 XP\_225013 similar to Gamma-tubulin complex 3 (GCP-3) (Spindle pole body Spc98 homol.)

### Community 23: Actinin/calmodulin

---

NP\_036650 Calm3 calmodulin 3  
 NP\_059015 Grp58 glucose regulated protein, 58 kDa  
 NP\_112267 Actn1 actinin, alpha 1  
 NP\_113863 Actn4 alpha actinin 4  
 XP\_213891 similar to abnormal spindle  
 XP\_214499 similar to actinin, alpha 2  
 XP\_343034 similar to dystrobrevin B (mDTN-B)

### Community 24: Proteasome

---

NP\_001005875 Psm12 proteasome 26S non-ATPase subunit 12  
 XP\_226439 similar to 26S proteasome non-ATPase regulatory subunit 7 (26S proteasome reg. subunit)  
 XP\_230377 similar to TRAF6  
 XP\_343114 similar to CD40 receptor associated factor 1  
 XP\_344977 similar to 26S proteasome subunit p40.5

### Community 25: Serine protease inhibitors

---

NP\_001007619 Rchy1 ring finger and CHY zinc finger domain containing 1  
 NP\_001007733 MGC94010 similar to SPI6  
 NP\_036630 Aldr1 aldehyde reductase 1 (low Km aldose reductase) (5.8 kb PstI fragment)  
 NP\_037215 Hspa5 heat shock 70kD protein 5  
 NP\_059036 Acox1 acyl-Coenzyme A oxidase 1, palmitoyl  
 NP\_067728 Serpinb2 serine (or cysteine) proteinase inhibitor, clade B, member 2  
 NP\_075218 Kcnip1 potassium channel interacting protein 1  
 NP\_113815 Nr1h3 nucleus receptor subfamily 1, group H, member 3  
 NP\_446231 Serpini1 serine (or cysteine) proteinase inhibitor, clade I (neuroserpin), member 1  
 NP\_476449 Serpinb5 serine (or cysteine) proteinase inhibitor, clade B, member 5  
 NP\_543169 Pde11a phosphodiesterase 11A  
 NP\_596897 Agpat4 1-acylglycerol-3-phosphate O-acyltransferase 4  
 NP\_741984 Spna2 alpha-spectrin 2  
 NP\_742005 Canx calnexin  
 NP\_742026 Eif2b1 eukaryotic translation initiation factor 2B, subunit 1 alpha  
 NP\_954888 Rela v-rel reticuloendotheliosis viral oncogene homolog A  
 XP\_213076 similar to GTP-binding protein NGB  
 XP\_233568 similar to Zinc finger protein 436  
 XP\_341644 similar to Polymerase (RNA) II (DNA directed) polypeptide C

**Community 26: Myosin**

---

|           |           |                                                              |
|-----------|-----------|--------------------------------------------------------------|
| NP_036650 | Calm3     | calmodulin 3                                                 |
| NP_058936 | Myh7      | myosin heavy chain, polypeptide 7                            |
| XP_218617 |           | similar to nonmuscle myosin heavy chain                      |
| XP_340818 | Myh4_pred | myosin, heavy polypeptide 4; now: XP_340819, similar to Myh4 |
| XP_343512 |           | similar to leucyl-tRNA synthetase                            |

**Community 27: Nucleoporin**

---

|           |      |                                                               |
|-----------|------|---------------------------------------------------------------|
| NP_036922 | Dspp | dentin sialophosphoprotein                                    |
| XP_218620 |      | similar to nucleus pore glycoprotein p62 (62 kDa nucleoporin) |
| XP_219265 |      | similar to importin 7                                         |
| XP_341509 |      | nucleoporin 153kD                                             |

**Community 28: Laminin**

---

|           |       |                                         |
|-----------|-------|-----------------------------------------|
| NP_112406 | Actb  | cytoplasm beta-actin                    |
| NP_113708 | Myh10 | myosin heavy chain 10, non-muscle       |
| XP_218617 |       | similar to nonmuscle myosin heavy chain |
| XP_225550 |       | similar to RIKEN cDNA 2310068O22        |
| XP_228209 |       | similar to Lama4 protein                |

**Community 29: Matrix metalloproteases**

---

|           |         |                                                                                |
|-----------|---------|--------------------------------------------------------------------------------|
| NP_037215 | Hspa5   | heat shock 70kD protein 5                                                      |
| NP_077376 | Adamts1 | a disintegrin and metalloproteinase with thrombospondin motifs 1               |
| NP_446301 | Erp70   | protein disulfide isomerase related protein (calcium-binding, intestinal-rel.) |
| XP_343193 |         | Now NP_001012197 Tra1_predicted tumor rejection antigen gp96 (predicted)       |

**Community 30: Casein kinase**

---

|           |         |                                                                                       |
|-----------|---------|---------------------------------------------------------------------------------------|
| NP_036654 | Cbs     | cystathionine beta synthase                                                           |
| NP_074046 | Csnk1g3 | casein kinase 1, gamma 3                                                              |
| XP_213368 |         | similar to Eukaryotic translation initiation factor 5A (eIF-5A, eIF-4D) (Rev-binding) |
| XP_343107 |         | similar to Vrk1 protein                                                               |

**Community 31: Zinc finger protein**

---

|           |          |                                        |
|-----------|----------|----------------------------------------|
| NP_062566 | Znf386   | zinc finger protein 386 (Kruppel-like) |
| NP_665887 | Lhx1     | LIM homeobox protein 1                 |
| NP_954525 | MGC73008 | Unknown (protein for MGC:73008)        |
| XP_342746 |          | hypothetical protein XP_342745         |

**Community 32: Actinin**

---

|           |        |                             |
|-----------|--------|-----------------------------|
| NP_112267 | Actn1  | actinin, alpha 1            |
| NP_113863 | Actn4  | alpha actinin 4             |
| NP_775148 | Pdlim7 | PDZ and LIM domain 7        |
| XP_214499 |        | similar to actinin, alpha 2 |
| XP_235710 |        | similar to Tenc1 protein    |

**Community 33: Breast cancer anti-estrogen resistance**

---

|           |       |                                                                     |
|-----------|-------|---------------------------------------------------------------------|
| NP_037063 | Bcar1 | breast cancer anti-estrogen resistance 1                            |
| NP_037213 | Ptk2  | PTK2 protein tyrosine kinase 2                                      |
| XP_217250 | Ephb1 | PREDICTED: Eph receptor B1 (Tyrosine-protein kinase receptor EPH-2) |
| XP_223781 |       | similar to Vinculin (Metavinculin)                                  |
| XP_233522 |       | similar to Eph-like receptor tyrosine kinase                        |
| XP_341935 |       | transforming growth factor beta 1 induced transcript 1              |
| XP_343143 |       | similar to ring finger protein 41; hypothetical SBBI03 protein      |

**Community 34: Breast cancer anti-estrogen resistance**

---

|           |       |                                                          |
|-----------|-------|----------------------------------------------------------|
| NP_036890 | Syk   | spleen tyrosine kinase                                   |
| NP_037063 | Bcar1 | breast cancer anti-estrogen resistance 1                 |
| NP_067719 | ErbB4 | v-erb-a erythroblastic leukemia viral oncogene homolog 4 |
| XP_223781 |       | similar to Vinculin (Metavinculin)                       |

XP\_341935

transforming growth factor beta 1 induced transcript 1

---

**Community 35: Protein-tyrosine kinases**

|           |        |                                                                                        |
|-----------|--------|----------------------------------------------------------------------------------------|
| NP_036887 | fyn    | fyn proto-oncogene                                                                     |
| NP_037137 | Pik3r1 | phosphatidylinositol 3-kinase, regulatory subunit, polypeptide 1                       |
| NP_037213 | Ptk2   | PTK2 protein tyrosine kinase 2                                                         |
| XP_217250 |        | similar to Ephrin type-B receptor 1 precursor (Tyrosine-protein kinase receptor EPH-2) |
| XP_342283 |        | SHC (Src homology 2 domain-containing) transforming protein 1                          |

---

**Community 36: Fyn proto-oncogene**

|           |         |                                             |
|-----------|---------|---------------------------------------------|
| NP_036887 | fyn     | fyn proto-oncogene                          |
| NP_569089 | Khdrbs1 | src associated in mitosis, 68 kDa           |
| XP_232763 | Lck     | lymphocyte-specific protein tyrosine kinase |
| XP_343333 |         | similar to SMARCD1 protein                  |

---
