# Supplementary material for: Cluster analysis of networks generated through homology: automatic identification of important protein communities involved in cancer metastasis
Source: PubMed Central journal article supplement (PMC1363365; doi:10.1186/1471-2105-7-2), 2006-01-06
Supplement: 1471-2105-7-2-S2.pdf [file 1471-2105-7-2-S2.pdf]

## Supplementary material – Microarray data

Pall F. Jonsson, Tamara Cavanna, Daniel Zicha and Paul A. Bates: Cluster analysis of networks generated through homology: automatic identification of important protein communities involved in cancer metastasis. BMC Bioinformatics, 2005.

| <b>RefSeq sequence ID</b> | <b>Expression Fold</b> |
|---------------------------|------------------------|
| NP_001000100              | -1                     |
| NP_001000284              | 1.032130484362528      |
| NP_001000387              | -1                     |
| NP_001000583              | 1.225547584056809      |
| NP_001000716              | 1.05583672789378       |
| NP_001000723              | 0.9391161759167254     |
| NP_001000942              | 1.2352992097103224     |
| NP_001000983              | -1                     |
| NP_001001515              | 0.7271615816290821     |
| NP_001001516              | 1.207633294311901      |
| NP_001001718              | 1.2062492814227743     |
| NP_001002016              | 0.9299693526401964     |
| NP_001002023              | 0.40473335097489477    |
| NP_001002289              | 1.0066218430707103     |
| NP_001002802              | -1                     |
| NP_001002807              | 1.4000012014078367     |
| NP_001002809              | 1.023046934624517      |
| NP_001002813              | 2.1504231635059234     |
| NP_001002827              | 1.0717381436542013     |
| NP_001002831              | 1.2733332966724527     |
| NP_001002851              | -1                     |
| NP_001002855              | -1                     |
| NP_001003401              | -1                     |
| NP_001003673              | 0.8639216742206198     |
| NP_001003708              | 1.0565792331569879     |
| NP_001003975              | -1                     |
| NP_001003978              | 0.8684366883679582     |
| NP_001004021              | -1                     |
| NP_001004022              | 1.1457632542161185     |
| NP_001004078              | 0.9147065029314764     |
| NP_001004080              | 0.9941397426883285     |
| NP_001004081              | 0.7754775203031948     |
| NP_001004084              | 1.2401554762053506     |
| NP_001004085              | 0.7810476582376338     |
| NP_001004086              | 0.726932481672724      |
| NP_001004089              | 0.7655280876635647     |
| NP_001004090              | -1                     |
| NP_001004091              | 0.8942064496043248     |
| NP_001004199              | 1.1394324920964143     |
| NP_001004200              | 0.8752596714907356     |
| NP_001004201              | -1                     |
| NP_001004202              | 1.579327109177539      |
| NP_001004203              | 1.2194189242792164     |
| NP_001004204              | 1.0262890502809865     |
| NP_001004206              | 0.9669321291943462     |
| NP_001004207              | 1.1709069628193476     |
| NP_001004209              | 1.6251681331310086     |
| NP_001004210              | 1.06332026696191       |
| NP_001004211              | 0.7877674367116082     |
| NP_001004214              | -1                     |
| NP_001004215              | 0.2179147945468516     |
| NP_001004218              | 0.9416187410379493     |
| NP_001004219              | 1.222088358394957      |
| NP_001004220              | 0.47738310324019056    |
| NP_001004222              | 1.0239973270686784     |

|              |                    |
|--------------|--------------------|
| NP_001004224 | 1.05817151841425   |
| NP_001004225 | 0.8020383685484512 |
| NP_001004226 | 0.8936733905171667 |
| NP_001004227 | 0.927812547903179  |
| NP_001004228 | 0.8178848156605549 |
| NP_001004230 | 0.8956154285212367 |
| NP_001004231 | 0.5126196743326804 |
| NP_001004233 | 1.3650588585293628 |
| NP_001004234 | 0.8626621798055859 |
| NP_001004235 | 0.9188403478419869 |
| NP_001004237 | 0.9584247765562678 |
| NP_001004239 | 1.0427409712494673 |
| NP_001004241 | 0.9194484037886043 |
| NP_001004242 | -1                 |
| NP_001004243 | 0.9116494435918829 |
| NP_001004244 | 0.8460068191469773 |
| NP_001004245 | 0.8035140144482419 |
| NP_001004247 | 0.9172991567433361 |
| NP_001004248 | 1.0796219166107417 |
| NP_001004249 | 0.4234021437308996 |
| NP_001004250 | 1.0232952117440395 |
| NP_001004252 | 0.9451208171651985 |
| NP_001004258 | 0.8492060122022229 |
| NP_001004260 | -1                 |
| NP_001004275 | 1.211269984888257  |
| NP_001004279 | 1.2172026917633163 |
| NP_001004280 | 0.9323810262876835 |
| NP_001004283 | 0.9223973827137512 |
| NP_001004424 | 1.1118579477398682 |
| NP_001004442 | 0.7745777742758886 |
| NP_001004446 | 1.1857598794418098 |
| NP_001005246 | -1                 |
| NP_001005383 | 1.110655871184064  |
| NP_001005529 | 1.1194731959546107 |
| NP_001005533 | 0.8879186659005591 |
| NP_001005537 | 1.0596972115029473 |
| NP_001005538 | 1.3151882696768242 |
| NP_001005539 | 2.036410471223044  |
| NP_001005540 | -1                 |
| NP_001005541 | 1.0998861975642882 |
| NP_001005543 | 0.7872589316029087 |
| NP_001005545 | 1.00408261365185   |
| NP_001005546 | 1.0517020492897513 |
| NP_001005547 | 0.9458535621491881 |
| NP_001005548 | 0.8703269958117619 |
| NP_001005550 | 1.030550111819295  |
| NP_001005551 | 3.693647930087434  |
| NP_001005552 | 0.9935870022290351 |
| NP_001005553 | 1.2254742821791198 |
| NP_001005554 | 0.9513986407922072 |
| NP_001005555 | 1.2305822169021605 |
| NP_001005558 | -1                 |
| NP_001005560 | 0.96402550186352   |
| NP_001005561 | 1.318542736036963  |
| NP_001005563 | 0.9648001435568769 |
| NP_001005564 | 0.9910412860786063 |
| NP_001005765 | 1.0153970170101936 |
| NP_001005871 | 1.4318686030930818 |
| NP_001005872 | 1.1227444850077852 |
| NP_001005876 | 0.8603454661799516 |
| NP_001005878 | 1.405519258344737  |
| NP_001005885 | -1                 |

|              |                    |
|--------------|--------------------|
| NP_001005891 | 1.8849271273486654 |
| NP_001005902 | 1.1070588308456224 |
| NP_001005903 | 0.9770933480533822 |
| NP_001005905 | 1.2601827594589727 |
| NP_001005906 | 0.6392983629501648 |
| NP_001005908 | 1.1023469219760633 |
| NP_001006610 | -1                 |
| NP_001006953 | 0.7753195066170172 |
| NP_001006955 | 1.1660830054652183 |
| NP_001006956 | 1.3715775199339681 |
| NP_001006959 | 1.2017772183661697 |
| NP_001006961 | 0.7868720235116041 |
| NP_001006964 | 0.9652847857909697 |
| NP_001006965 | 0.7887987412514862 |
| NP_001006966 | 0.7213011760909795 |
| NP_001006967 | 0.8449580711427251 |
| NP_001006968 | 1.0908404121182083 |
| NP_001006969 | 1.039563906496282  |
| NP_001006970 | 0.9763745726762615 |
| NP_001006971 | 1.0265680122129106 |
| NP_001006973 | 0.9487305216266696 |
| NP_001006974 | 0.8734901388683545 |
| NP_001006975 | 1.153120150393184  |
| NP_001006977 | 0.7778543087985965 |
| NP_001006979 | 0.6378928777122892 |
| NP_001006982 | 1.0774273499531057 |
| NP_001006983 | 1.054899169405582  |
| NP_001006984 | 0.8386553073500597 |
| NP_001006985 | 1.4373800583798404 |
| NP_001006986 | 0.8638614914729227 |
| NP_001006987 | 1.1119904669565928 |
| NP_001006992 | 1.3929643298498566 |
| NP_001006993 | 0.4347489964031958 |
| NP_001006996 | 1.0425598019868663 |
| NP_001006998 | 0.9687437136420073 |
| NP_001007001 | 0.7624172208197781 |
| NP_001007004 | 1.2589938599042088 |
| NP_001007005 | 0.7366497663824947 |
| NP_001007008 | 0.9842481962576293 |
| NP_001007009 | -1                 |
| NP_001007145 | 1.1630704718669185 |
| NP_001007146 | 0.9690916135600879 |
| NP_001007149 | 0.8728646525439278 |
| NP_001007150 | 0.7571332794523906 |
| NP_001007236 | 0.9290204510469491 |
| NP_001007600 | 1.1450653795591628 |
| NP_001007601 | 1.2057156325500502 |
| NP_001007602 | -1                 |
| NP_001007603 | 1.0586607293317076 |
| NP_001007605 | 1.0818919873970627 |
| NP_001007606 | 1.408629550571323  |
| NP_001007609 | 0.9271772021232617 |
| NP_001007611 | 0.8993389136054272 |
| NP_001007614 | 1.090072447869259  |
| NP_001007616 | 0.9465430606055422 |
| NP_001007621 | 1.0175964721188557 |
| NP_001007622 | 0.7008966811596334 |
| NP_001007623 | 0.7116345003021115 |
| NP_001007625 | 1.2344396026065112 |
| NP_001007629 | 0.9290750027310765 |
| NP_001007630 | 0.9654704871943515 |
| NP_001007634 | 0.9004541143508704 |

|              |                    |
|--------------|--------------------|
| NP_001007635 | 0.9870124512094982 |
| NP_001007637 | 1.9174563292389404 |
| NP_001007638 | 0.7856657426530864 |
| NP_001007648 | 1.039880585517269  |
| NP_001007649 | 1.1041799750683738 |
| NP_001007650 | 1.0622641000741224 |
| NP_001007652 | 0.9417354830553939 |
| NP_001007654 | 0.7676278871222396 |
| NP_001007655 | 1.0609542371574603 |
| NP_001007656 | 0.9494114173616199 |
| NP_001007660 | 0.8202443962112689 |
| NP_001007664 | 0.8408496022995865 |
| NP_001007666 | 0.8748500601305967 |
| NP_001007667 | 0.9502276335318934 |
| NP_001007668 | 0.9464165665928973 |
| NP_001007671 | -1                 |
| NP_001007676 | 0.5705590041410159 |
| NP_001007677 | 0.9113992185721265 |
| NP_001007678 | -1                 |
| NP_001007681 | 1.610349207963374  |
| NP_001007684 | 0.5453114616700651 |
| NP_001007685 | 1.0822813325955085 |
| NP_001007690 | 0.7989697479427571 |
| NP_001007692 | 0.9073395247267336 |
| NP_001007695 | 1.4907533177796244 |
| NP_001007696 | -1                 |
| NP_001007697 | 0.6825953547072178 |
| NP_001007702 | 1.132852502333679  |
| NP_001007709 | 1.2663692586312634 |
| NP_001007710 | 1.0614579817785823 |
| NP_001007715 | 0.9864664690545039 |
| NP_001007716 | 1.3174774317777898 |
| NP_001007724 | 0.8037015277924769 |
| NP_001007726 | 0.9557789676244033 |
| NP_001007730 | 1.5125819055240683 |
| NP_001007733 | 1.9105645445816481 |
| NP_001007734 | 0.7370989422885263 |
| NP_001007735 | 0.9068543806932688 |
| NP_001007736 | 0.8900970014661388 |
| NP_001007740 | 0.9507139633995841 |
| NP_001007741 | 1.3096197479625078 |
| NP_001007743 | 0.846616564418811  |
| NP_001007744 | -1                 |
| NP_001007750 | 1.0710534816338566 |
| NP_001007754 | 0.7471386062630286 |
| NP_001007757 | 0.8915505535896794 |
| NP_001007759 | 0.8118460758364406 |
| NP_001007800 | 1.297498652915413  |
| NP_001007802 | 0.402208030312879  |
| NP_001007804 | 0.8515296721848675 |
| NP_001007805 | 0.9323266534373408 |
| NP_001008218 | 0.9037654481831482 |
| NP_001008278 | 0.9601756985586091 |
| NP_001008279 | 1.5254224490139114 |
| NP_001008280 | 1.13912472214294   |
| NP_001008282 | 0.9889030226311663 |
| NP_001008283 | 0.5144369059441162 |
| NP_001008287 | 0.7768966480787709 |
| NP_001008289 | 1.0825547362883787 |
| NP_001008290 | 1.0306119851694346 |
| NP_001008291 | 0.8734431220212723 |
| NP_001008293 | 0.9682230892557122 |

|              |                    |
|--------------|--------------------|
| NP_001008300 | 0.9470288073602248 |
| NP_001008303 | 1.2284880013484747 |
| NP_001008304 | 0.9754252552446433 |
| NP_001008305 | 0.937352683552746  |
| NP_001008306 | 0.8710853183536096 |
| NP_001008308 | 0.6837373394544012 |
| NP_001008309 | 1.255782451850499  |
| NP_001008310 | 0.9453736344765685 |
| NP_001008313 | 1.282557802983389  |
| NP_001008314 | 0.8464352697024684 |
| NP_001008315 | 1.0723908954021362 |
| NP_001008319 | 0.9364669651750769 |
| NP_001008322 | 1.4335424573751192 |
| NP_001008323 | 0.9167846543260271 |
| NP_001008324 | 0.8101467262257273 |
| NP_001008325 | 1.054251621393351  |
| NP_001008326 | 0.9883307361421432 |
| NP_001008327 | 0.6168403420114749 |
| NP_001008328 | 0.8942953795350682 |
| NP_001008330 | 1.085505638210098  |
| NP_001008331 | 0.8166202905190323 |
| NP_001008334 | 1.4613174011718149 |
| NP_001008336 | 1.067568735577406  |
| NP_001008340 | 0.9366041456859256 |
| NP_001008342 | -1                 |
| NP_001008343 | 0.9191736771726218 |
| NP_001008344 | 0.9571310179937434 |
| NP_001008350 | 1.3527134068149245 |
| NP_001008351 | 0.9878020072178922 |
| NP_001008353 | 0.9527891231384719 |
| NP_001008359 | 1.6829890918346624 |
| NP_001008361 | 0.846093180981136  |
| NP_001008362 | 1.1668667990869677 |
| NP_001008368 | 0.8958210572679763 |
| NP_001008369 | 0.9330836518638758 |
| NP_001008370 | 1.048640807126965  |
| NP_001008371 | 0.6701486475455035 |
| NP_001008373 | 1.157175944848835  |
| NP_001008377 | 0.7932102779139297 |
| NP_001008381 | 1.0481159637142745 |
| NP_001008385 | 1.5769570857344652 |
| NP_001008507 | 0.9654801830464219 |
| NP_001008510 | 1.3967300214458893 |
| NP_001008514 | -1                 |
| NP_001008515 | 1.1676864626721775 |
| NP_001008519 | 0.8313109948165057 |
| NP_001008520 | 0.5606146417916564 |
| NP_001008524 | 1.1549014796759407 |
| NP_001008525 | 0.8243907934243951 |
| NP_001008526 | 1.2319776957239816 |
| NP_001008553 | 0.8184778249571103 |
| NP_001008557 | -1                 |
| NP_001008558 | -1                 |
| NP_001008562 | 0.8148974799608947 |
| NP_001008694 | 0.55665112727911   |
| NP_001008721 | 1.0215530765283067 |
| NP_001008724 | -1                 |
| NP_001008725 | 1.0016431784829418 |
| NP_001008751 | -1                 |
| NP_001008759 | -1                 |
| NP_001008764 | 1.0530961595729285 |
| NP_001008766 | 0.8302617748693842 |

|              |                     |
|--------------|---------------------|
| NP_001008767 | 0.2997500484046876  |
| NP_001008768 | 1.0291988093211557  |
| NP_001008770 | 3.1308360267630992  |
| NP_001008775 | 1.1531695165923739  |
| NP_001008776 | -1                  |
| NP_001008802 | -1                  |
| NP_001008804 | 1.12244586447785    |
| NP_001008817 | -1                  |
| NP_001008823 | -1                  |
| NP_001008826 | 1.1624466963648703  |
| NP_001008829 | 1.1523434346858348  |
| NP_001008831 | 1.5887244886797722  |
| NP_001008835 | 0.9102111581851379  |
| NP_001008836 | 1.301007104374525   |
| NP_001008838 | 1.3138703166926609  |
| NP_001008839 | 1.4019898830785877  |
| NP_001008843 | 1.3522669178886488  |
| NP_001008845 | 1.0811508647003274  |
| NP_001008847 | 1.1895088366682318  |
| NP_001008855 | 1.2184891573222583  |
| NP_001008879 | 1.1184112292508497  |
| NP_001008884 | 1.1135798105418315  |
| NP_001008887 | 1.0156790050519644  |
| NP_001008888 | 0.9719144404793699  |
| NP_001008890 | -1                  |
| NP_001008893 | 1.0119589126853241  |
| NP_001009180 | 1.807316163564239   |
| NP_001009239 | 1.15719148057267    |
| NP_001009246 | 1.044636890661804   |
| NP_001009255 | 0.8745199738943814  |
| NP_001009268 | 1.1500404528701103  |
| NP_001009271 | 0.47945804228176797 |
| NP_001009275 | 0.7837630470569503  |
| NP_001009283 | -1                  |
| NP_001009290 | 1.2109648208160244  |
| NP_001009316 | 1.0416517511647867  |
| NP_001009344 | 0.6643725012883381  |
| NP_001009369 | 0.9554864072495679  |
| NP_001009416 | 1.0715878216533834  |
| NP_001009419 | 0.9777988467674027  |
| NP_001009422 | 0.5415055384686058  |
| NP_001009430 | 0.5188157977851201  |
| NP_001009455 | 1.2371666185934178  |
| NP_001009470 | 0.9931330424694501  |
| NP_001009480 | 0.7778071146630503  |
| NP_001009494 | 1.404455821963027   |
| NP_007225    | 1.542237636404722   |
| NP_007226    | 1.0706192694181027  |
| NP_007227    | 0.9625522312739442  |
| NP_007228    | 1.1532631483452234  |
| NP_007232    | 1.1059290584205101  |
| NP_007234    | 1.3004018446973813  |
| NP_007237    | 1.19358175349372    |
| NP_036620    | -1                  |
| NP_036621    | 0.6942723389794754  |
| NP_036622    | 1.1642062939911277  |
| NP_036623    | -1                  |
| NP_036624    | 1.5837569167549124  |
| NP_036625    | -1                  |
| NP_036626    | 1.3644124222817668  |
| NP_036627    | 1.066509402348176   |
| NP_036628    | -1                  |

|           |                    |
|-----------|--------------------|
| NP_036629 | 0.4023412572273299 |
| NP_036630 | 1.0738067529550677 |
| NP_036631 | 1.226133616378822  |
| NP_036632 | 1.1918084839164667 |
| NP_036633 | -1                 |
| NP_036634 | 1.1127387500822605 |
| NP_036635 | 1.0381386861508386 |
| NP_036636 | 1.5437918605512664 |
| NP_036637 | 1.1010370503379088 |
| NP_036638 | 1.1822888376234388 |
| NP_036639 | -1                 |
| NP_036640 | 1.149057601150624  |
| NP_036642 | -1                 |
| NP_036643 | 1.1820009728284406 |
| NP_036644 | 1.246863824374277  |
| NP_036645 | 0.5355420303265356 |
| NP_036646 | 1.3268772941844997 |
| NP_036647 | 0.9799538991539355 |
| NP_036648 | -1                 |
| NP_036649 | 1.209176072769881  |
| NP_036651 | 1.291013634410233  |
| NP_036652 | 1.1188393700188304 |
| NP_036653 | -1                 |
| NP_036654 | 1.0594525952966478 |
| NP_036655 | 1.8190339527104011 |
| NP_036656 | -1                 |
| NP_036658 | 0.8094934304614871 |
| NP_036659 | 3.0600615353889453 |
| NP_036660 | -1                 |
| NP_036661 | 0.8703882095392784 |
| NP_036662 | 1.1333061018335906 |
| NP_036663 | 0.8629919204930006 |
| NP_036664 | 0.6187177075740025 |
| NP_036665 | -1                 |
| NP_036666 | -1                 |
| NP_036667 | -1                 |
| NP_036668 | 1.7285197010102162 |
| NP_036670 | -1                 |
| NP_036672 | -1                 |
| NP_036673 | -1                 |
| NP_036674 | -1                 |
| NP_036675 | 1.4450068399153049 |
| NP_036676 | -1                 |
| NP_036677 | 1.0157726032172867 |
| NP_036678 | -1                 |
| NP_036679 | 0.8966834734074247 |
| NP_036680 | 0.9833420648095714 |
| NP_036681 | -1                 |
| NP_036682 | 1.5851727278409076 |
| NP_036683 | 0.4662807926857402 |
| NP_036684 | -1                 |
| NP_036685 | -1                 |
| NP_036686 | 1.0191011754739536 |
| NP_036687 | 0.9983316999254165 |
| NP_036688 | -1                 |
| NP_036689 | 1.0810695761859441 |
| NP_036690 | -1                 |
| NP_036691 | 0.5773254059354876 |
| NP_036692 | -1                 |
| NP_036693 | 0.4161126215297359 |
| NP_036694 | 0.8406844967831844 |
| NP_036695 | -1                 |

|           |                    |
|-----------|--------------------|
| NP_036696 | 1.0648099354440044 |
| NP_036697 | 1.0536213534710825 |
| NP_036698 | -1                 |
| NP_036699 | 1.0769321908131515 |
| NP_036700 | -1                 |
| NP_036701 | 0.7927115006637498 |
| NP_036702 | 1.4413473850660359 |
| NP_036703 | 1.048838454262486  |
| NP_036704 | -1                 |
| NP_036705 | 1.2093249832848671 |
| NP_036706 | 1.448203907216065  |
| NP_036707 | 1.1037136188912544 |
| NP_036708 | 1.1013183814923952 |
| NP_036709 | 1.530724096774328  |
| NP_036710 | 0.3183354947823467 |
| NP_036711 | -1                 |
| NP_036712 | 1.791011552014     |
| NP_036713 | 1.237273829269442  |
| NP_036714 | -1                 |
| NP_036715 | 0.865882239104344  |
| NP_036716 | 1.2368695476367875 |
| NP_036717 | -1                 |
| NP_036718 | -1                 |
| NP_036719 | -1                 |
| NP_036720 | 0.9980912100802406 |
| NP_036721 | 0.3575521226031837 |
| NP_036722 | 0.9593478654674426 |
| NP_036723 | 1.1901308750644117 |
| NP_036724 | 0.5192122872550047 |
| NP_036725 | -1                 |
| NP_036726 | -1                 |
| NP_036727 | 0.4014752577118021 |
| NP_036728 | 0.6195264192002462 |
| NP_036729 | -1                 |
| NP_036730 | 1.4797119634158218 |
| NP_036731 | -1                 |
| NP_036732 | 0.90616405660986   |
| NP_036733 | 0.5931411440480243 |
| NP_036735 | 0.9659456568247675 |
| NP_036736 | -1                 |
| NP_036737 | 0.6180444911069239 |
| NP_036738 | 0.5230738181050695 |
| NP_036739 | -1                 |
| NP_036740 | 0.7828753776872821 |
| NP_036741 | 1.102933970537723  |
| NP_036742 | -1                 |
| NP_036743 | 1.5822795208108515 |
| NP_036744 | -1                 |
| NP_036745 | -1                 |
| NP_036746 | 0.941759752840872  |
| NP_036747 | 0.8015671664858456 |
| NP_036748 | 2.10955886512318   |
| NP_036749 | -1                 |
| NP_036750 | 1.149879626834695  |
| NP_036751 | -1                 |
| NP_036752 | 0.8845264953278473 |
| NP_036753 | 0.7988206674554664 |
| NP_036755 | 1.3289640455631802 |
| NP_036756 | -1                 |
| NP_036757 | 1.1815070666560528 |
| NP_036758 | -1                 |
| NP_036759 | 1.1964998866400267 |



|           |                     |
|-----------|---------------------|
| NP_036760 | 1.1755501017121117  |
| NP_036761 | -1                  |
| NP_036762 | 1.0864392843289132  |
| NP_036763 | 2.159030788084101   |
| NP_036764 | 0.7527164789468608  |
| NP_036765 | 1.0663267147910707  |
| NP_036766 | 1.0907858325595623  |
| NP_036767 | -1                  |
| NP_036768 | 1.618195499992548   |
| NP_036769 | 1.025051655485252   |
| NP_036771 | 1.2178534163838273  |
| NP_036772 | 0.28003154949409426 |
| NP_036773 | 1.047624264095437   |
| NP_036774 | 1.0898758188201632  |
| NP_036775 | -1                  |
| NP_036777 | 1.1105855690184312  |
| NP_036778 | 3.5623211712043896  |
| NP_036779 | -1                  |
| NP_036780 | 1.1372696536189264  |
| NP_036781 | 1.3631099271689326  |
| NP_036782 | -1                  |
| NP_036783 | 1.3939771974504573  |
| NP_036784 | 1.0637158251081171  |
| NP_036785 | -1                  |
| NP_036786 | 1.00679010884026    |
| NP_036787 | 1.1834187135375391  |
| NP_036788 | 0.7152917813815958  |
| NP_036789 | -1                  |
| NP_036791 | -1                  |
| NP_036792 | -1                  |
| NP_036793 | 1.1100008183966377  |
| NP_036794 | -1                  |
| NP_036795 | 1.4691321795751024  |
| NP_036796 | 1.0938685059829443  |
| NP_036797 | -1                  |
| NP_036798 | -1                  |
| NP_036799 | 1.1575387975437568  |
| NP_036800 | -1                  |
| NP_036801 | -1                  |
| NP_036802 | 1.252686796691534   |
| NP_036803 | 3.014263461038766   |
| NP_036804 | 1.1893764597743361  |
| NP_036805 | 0.34367061552678707 |
| NP_036806 | 1.212805591463844   |
| NP_036807 | -1                  |
| NP_036808 | -1                  |
| NP_036809 | -1                  |
| NP_036810 | 1.1837751691965264  |
| NP_036812 | 1.214830370976249   |
| NP_036813 | 1.2275198404439225  |
| NP_036814 | -1                  |
| NP_036816 | 1.2336622508416328  |
| NP_036817 | 0.9151596938593836  |
| NP_036818 | 1.2590395697263443  |
| NP_036819 | 1.3348040947615163  |
| NP_036820 | -1                  |
| NP_036821 | -1                  |
| NP_036822 | 1.4098862187787529  |
| NP_036824 | 0.9834778732052932  |
| NP_036825 | -1                  |
| NP_036826 | 1.0900183901514064  |
| NP_036827 | 0.711436741627487   |

|           |                    |
|-----------|--------------------|
| NP_036828 | -1                 |
| NP_036829 | -1                 |
| NP_036831 | 1.674166750549155  |
| NP_036832 | -1                 |
| NP_036833 | 1.9355908939279878 |
| NP_036834 | -1                 |
| NP_036835 | 1.2429748122609388 |
| NP_036836 | -1                 |
| NP_036837 | 1.1676965661461653 |
| NP_036838 | 1.0577378939957598 |
| NP_036839 | -1                 |
| NP_036840 | 1.8073828496504512 |
| NP_036842 | -1                 |
| NP_036843 | -1                 |
| NP_036845 | 1.5093703763221589 |
| NP_036846 | -1                 |
| NP_036847 | 1.291045972032225  |
| NP_036848 | 1.031751970677334  |
| NP_036849 | 0.6652445605815466 |
| NP_036850 | -1                 |
| NP_036851 | 1.1103368265611315 |
| NP_036852 | -1                 |
| NP_036853 | 1.1684803227411251 |
| NP_036855 | -1                 |
| NP_036856 | 0.8274060780364584 |
| NP_036857 | -1                 |
| NP_036858 | 1.1327675219741353 |
| NP_036859 | 1.081558063202127  |
| NP_036860 | -1                 |
| NP_036861 | -1                 |
| NP_036862 | -1                 |
| NP_036863 | -1                 |
| NP_036864 | 0.8755483959124831 |
| NP_036865 | 0.7703123545779551 |
| NP_036866 | 1.2164491585050987 |
| NP_036867 | 1.4178078901342532 |
| NP_036868 | 0.7917035600857303 |
| NP_036869 | -1                 |
| NP_036870 | -1                 |
| NP_036871 | -1                 |
| NP_036872 | 1.1722741091602469 |
| NP_036873 | -1                 |
| NP_036874 | -1                 |
| NP_036875 | 1.3143820540560591 |
| NP_036876 | 1.2296168903984588 |
| NP_036877 | 1.277280730774837  |
| NP_036878 | -1                 |
| NP_036879 | 0.7959560269400665 |
| NP_036880 | 1.0224873058024573 |
| NP_036881 | 2.4894776713224305 |
| NP_036882 | 1.1577988961226593 |
| NP_036883 | 0.824841206741062  |
| NP_036884 | 2.478914178927263  |
| NP_036885 | -1                 |
| NP_036886 | 1.421107648833491  |
| NP_036887 | 1.8474185668462009 |
| NP_036888 | 0.995887944013541  |
| NP_036889 | -1                 |
| NP_036890 | 1.303353222184901  |
| NP_036891 | 1.7460014550096927 |
| NP_036892 | -1                 |
| NP_036893 | -1                 |

|           |                     |
|-----------|---------------------|
| NP_036894 | 1.9176857014476443  |
| NP_036895 | 0.9505722384094478  |
| NP_036896 | 1.1457494222083293  |
| NP_036897 | 1.0034839993697908  |
| NP_036898 | 0.786228423988281   |
| NP_036899 | 1.0526890437525143  |
| NP_036900 | -1                  |
| NP_036901 | 1.0918170075897553  |
| NP_036902 | -1                  |
| NP_036903 | 1.534140862930338   |
| NP_036906 | 1.334777439753534   |
| NP_036907 | 2.7256537659051223  |
| NP_036908 | 1.153250196216786   |
| NP_036909 | 0.21958158329955957 |
| NP_036910 | 2.59135941998107    |
| NP_036911 | -1                  |
| NP_036912 | 0.7225834589780794  |
| NP_036913 | 0.7751488561252878  |
| NP_036915 | 0.7940468198440871  |
| NP_036916 | 1.0000776556584923  |
| NP_036917 | 1.2886265550918248  |
| NP_036918 | 1.073586379123433   |
| NP_036920 | 0.7965615402524833  |
| NP_036921 | 1.0593168555024415  |
| NP_036922 | 1.2217674705772168  |
| NP_036923 | 1.0613362937825588  |
| NP_036924 | -1                  |
| NP_036925 | 0.6811352549179431  |
| NP_036926 | -1                  |
| NP_036927 | -1                  |
| NP_036928 | 1.1099953725140892  |
| NP_036929 | 1.197390845122878   |
| NP_036930 | -1                  |
| NP_036931 | -1                  |
| NP_036932 | -1                  |
| NP_036933 | 1.3278210486361164  |
| NP_036935 | -1                  |
| NP_036936 | 0.9865932588426604  |
| NP_036937 | -1                  |
| NP_036938 | 1.1215287125836582  |
| NP_036939 | 0.5375410383414729  |
| NP_036942 | 1.6121900135516387  |
| NP_036943 | 1.566358846235942   |
| NP_036944 | 3.261781398762175   |
| NP_036945 | -1                  |
| NP_036947 | 1.5210951531279253  |
| NP_036948 | 1.0955456460366182  |
| NP_036949 | -1                  |
| NP_036950 | -1                  |
| NP_036951 | 0.8767786655848279  |
| NP_036952 | 1.3578548654358455  |
| NP_036953 | 1.151065899954549   |
| NP_036954 | 1.0998663487834965  |
| NP_036955 | 1.4104722376888852  |
| NP_036956 | 0.774975100006189   |
| NP_036957 | -1                  |
| NP_036958 | 1.1347267189016064  |
| NP_036959 | 1.025795821962699   |
| NP_036960 | 0.8701425676030521  |
| NP_036961 | 1.0481716003669879  |
| NP_036962 | 1.6130097379167174  |
| NP_036964 | -1                  |

|           |                     |
|-----------|---------------------|
| NP_036965 | 1.3255096354788574  |
| NP_036966 | 0.6544811725057648  |
| NP_036967 | -1                  |
| NP_036968 | 0.8421518401200951  |
| NP_036969 | 1.077591829827537   |
| NP_036970 | 0.928320128439629   |
| NP_036971 | 0.9557341374148081  |
| NP_036972 | -1                  |
| NP_036973 | -1                  |
| NP_036974 | 0.9791572905383571  |
| NP_036975 | 1.5866858914879973  |
| NP_036976 | 0.43305826018656024 |
| NP_036977 | 0.9718115560324128  |
| NP_036978 | 1.0245827877008253  |
| NP_036979 | 1.2319693734040036  |
| NP_036980 | 1.3638840761443347  |
| NP_036981 | -1                  |
| NP_036982 | 1.055063768599446   |
| NP_036983 | 1.1175901782052358  |
| NP_036984 | -1                  |
| NP_036985 | 1.6880547489202848  |
| NP_036986 | -1                  |
| NP_036987 | 0.6198193721984225  |
| NP_036988 | -1                  |
| NP_036989 | 1.0721312396084466  |
| NP_036990 | 0.9844757622098408  |
| NP_036991 | 1.8740017111103093  |
| NP_036992 | -1                  |
| NP_036993 | 0.5221871620182938  |
| NP_036994 | 0.7194480351904554  |
| NP_036995 | -1                  |
| NP_036996 | -1                  |
| NP_036997 | 1.125462932481018   |
| NP_036998 | 1.2686373410537888  |
| NP_036999 | 1.1600730219060493  |
| NP_037000 | -1                  |
| NP_037001 | 1.2006202363098242  |
| NP_037002 | -1                  |
| NP_037003 | -1                  |
| NP_037004 | -1                  |
| NP_037005 | -1                  |
| NP_037006 | 0.8107537984525516  |
| NP_037007 | 1.0837575152082015  |
| NP_037008 | 1.1133236416003924  |
| NP_037009 | -1                  |
| NP_037010 | -1                  |
| NP_037011 | -1                  |
| NP_037012 | 0.7671654706197963  |
| NP_037013 | 4.517390823930934   |
| NP_037014 | -1                  |
| NP_037015 | -1                  |
| NP_037016 | 1.1334984574524452  |
| NP_037018 | 1.4831973954081357  |
| NP_037019 | 1.2416026399522746  |
| NP_037020 | -1                  |
| NP_037021 | 0.5802015994572206  |
| NP_037022 | 1.153064125240893   |
| NP_037023 | 0.7996974963140132  |
| NP_037024 | 1.0597259702258748  |
| NP_037025 | 1.289055766276666   |
| NP_037026 | 1.4309054915233197  |
| NP_037027 | 0.878196301974886   |

|           |                    |
|-----------|--------------------|
| NP_037028 | -1                 |
| NP_037029 | -1                 |
| NP_037030 | 0.9235649561025857 |
| NP_037031 | 0.7066903302540544 |
| NP_037032 | -1                 |
| NP_037033 | -1                 |
| NP_037034 | -1                 |
| NP_037035 | 1.2153148514427308 |
| NP_037036 | 1.2554161662366863 |
| NP_037039 | 1.4570714586249052 |
| NP_037040 | 1.139559780492073  |
| NP_037041 | -1                 |
| NP_037042 | 1.901836444039229  |
| NP_037043 | 1.848100763531219  |
| NP_037044 | 0.9690293791167498 |
| NP_037046 | 0.924902997352182  |
| NP_037047 | 1.1242762898912788 |
| NP_037048 | -1                 |
| NP_037050 | 2.608617521093768  |
| NP_037051 | 1.3106244413213388 |
| NP_037052 | -1                 |
| NP_037053 | -1                 |
| NP_037054 | 0.9268112471414981 |
| NP_037055 | 1.1202133997124422 |
| NP_037056 | 1.890988423305731  |
| NP_037057 | 1.782797223320035  |
| NP_037058 | -1                 |
| NP_037059 | -1                 |
| NP_037060 | -1                 |
| NP_037061 | -1                 |
| NP_037062 | -1                 |
| NP_037063 | 1.3404139561249968 |
| NP_037064 | -1                 |
| NP_037066 | 0.7258036982610013 |
| NP_037067 | 0.6997289806015615 |
| NP_037068 | -1                 |
| NP_037069 | -1                 |
| NP_037070 | 1.246272112321617  |
| NP_037071 | 0.3741195728906712 |
| NP_037072 | 0.6305912358667898 |
| NP_037073 | 1.3283958622817655 |
| NP_037074 | 1.0149255607671908 |
| NP_037075 | 1.2625541160390323 |
| NP_037076 | -1                 |
| NP_037077 | 1.2286710013364763 |
| NP_037078 | 0.8562977891686988 |
| NP_037079 | 1.3873495810553127 |
| NP_037080 | 0.9750738040594138 |
| NP_037081 | 0.9553121162413846 |
| NP_037082 | 1.218425962816564  |
| NP_037083 | 1.7568778837452654 |
| NP_037084 | -1                 |
| NP_037085 | 1.7464189453684429 |
| NP_037086 | 0.8607398663666316 |
| NP_037087 | 1.2195405027854986 |
| NP_037088 | -1                 |
| NP_037089 | -1                 |
| NP_037090 | -1                 |
| NP_037091 | -1                 |
| NP_037092 | 1.1324038326162318 |
| NP_037093 | -1                 |
| NP_037094 | 1.1571786363927463 |

|           |                    |
|-----------|--------------------|
| NP_037095 | 0.9338137408432028 |
| NP_037096 | 1.2068183721843981 |
| NP_037097 | -1                 |
| NP_037098 | 0.7881769539703498 |
| NP_037099 | 0.7104311533706366 |
| NP_037100 | 1.6299340659476036 |
| NP_037101 | 1.2602934304608144 |
| NP_037102 | -1                 |
| NP_037103 | -1                 |
| NP_037104 | -1                 |
| NP_037105 | -1                 |
| NP_037106 | 1.1421532995966759 |
| NP_037107 | 1.032489104801833  |
| NP_037108 | -1                 |
| NP_037109 | 0.595716599643625  |
| NP_037110 | 1.0631268621648329 |
| NP_037112 | 0.8154030067975158 |
| NP_037113 | 1.160173131881039  |
| NP_037114 | -1                 |
| NP_037115 | 1.3619772903119103 |
| NP_037116 | 1.0710536084608542 |
| NP_037117 | 0.9053761221564124 |
| NP_037119 | 0.9539518457311953 |
| NP_037120 | 0.5108879963488897 |
| NP_037123 | 0.8296252942199632 |
| NP_037124 | 0.8949069817801015 |
| NP_037125 | 1.1560341193013177 |
| NP_037126 | 1.1564248822082999 |
| NP_037127 | 26.86382740569403  |
| NP_037128 | -1                 |
| NP_037129 | -1                 |
| NP_037130 | 0.8590353300640152 |
| NP_037131 | 1.1144630389624126 |
| NP_037132 | 1.0457299243600624 |
| NP_037133 | 1.3160702322375062 |
| NP_037134 | 2.876828484392806  |
| NP_037135 | 0.6263818339763777 |
| NP_037136 | 1.4862221459420233 |
| NP_037137 | -1                 |
| NP_037138 | 1.2204172335967365 |
| NP_037139 | -1                 |
| NP_037140 | -1                 |
| NP_037142 | 0.8507850279199634 |
| NP_037143 | 1.345689549248618  |
| NP_037144 | -1                 |
| NP_037145 | 1.3388720861782601 |
| NP_037146 | 1.1567382344315682 |
| NP_037147 | -1                 |
| NP_037148 | 1.6756122979955865 |
| NP_037150 | 0.9731546566850513 |
| NP_037151 | 1.013329358212485  |
| NP_037153 | 0.4158033932065679 |
| NP_037154 | 1.768046998497524  |
| NP_037155 | -1                 |
| NP_037156 | 2.7511849091745724 |
| NP_037157 | 1.8874315448698846 |
| NP_037158 | 1.8158028129946997 |
| NP_037159 | 0.5360052135736179 |
| NP_037160 | 1.6692837304963748 |
| NP_037161 | 1.0711212319558756 |
| NP_037162 | 0.9880130277016369 |
| NP_037163 | 1.0958207154305728 |

|           |                    |
|-----------|--------------------|
| NP_037164 | 1.0498989525632008 |
| NP_037165 | -1                 |
| NP_037166 | 1.5483776132909446 |
| NP_037168 | -1                 |
| NP_037169 | 0.6194042008783669 |
| NP_037170 | 1.684111165402506  |
| NP_037171 | 1.0273691216335101 |
| NP_037172 | 1.0093704503114351 |
| NP_037173 | 1.3608076203094273 |
| NP_037174 | 0.8855175613149407 |
| NP_037176 | 8.962689231553645  |
| NP_037177 | 2.0105367140652692 |
| NP_037178 | 1.142704213334554  |
| NP_037179 | 0.748089429807781  |
| NP_037180 | -1                 |
| NP_037181 | 1.0360871765658617 |
| NP_037182 | 0.9853932568509028 |
| NP_037183 | -1                 |
| NP_037184 | 1.1708390329611804 |
| NP_037185 | 1.1315719861134295 |
| NP_037187 | 1.1148881528222587 |
| NP_037189 | 3.0490338157895067 |
| NP_037190 | 1.1306391906569442 |
| NP_037191 | -1                 |
| NP_037192 | 1.138820589580204  |
| NP_037193 | -1                 |
| NP_037194 | 0.7385522041699217 |
| NP_037195 | 1.0211536767880993 |
| NP_037196 | -1                 |
| NP_037197 | 1.0078770984387668 |
| NP_037198 | -1                 |
| NP_037199 | 1.0087668442213638 |
| NP_037200 | -1                 |
| NP_037201 | 1.3064388658937842 |
| NP_037202 | 1.8901833382889255 |
| NP_037203 | 0.4951616970524911 |
| NP_037205 | 1.024323348047179  |
| NP_037206 | 1.1272625458025776 |
| NP_037207 | 0.9432283206993688 |
| NP_037208 | -1                 |
| NP_037209 | -1                 |
| NP_037210 | 0.9928833093408468 |
| NP_037211 | 0.3953410372403401 |
| NP_037212 | 1.313383781501454  |
| NP_037213 | 0.9652254699837087 |
| NP_037214 | 2.1334881361528466 |
| NP_037215 | 1.0206831073769667 |
| NP_037216 | 1.4750853904537233 |
| NP_037217 | 2.8640885329353587 |
| NP_037218 | -1                 |
| NP_037219 | 1.180237533157636  |
| NP_037220 | 1.3825336177202543 |
| NP_037221 | -1                 |
| NP_037222 | 1.2157341006395908 |
| NP_037223 | 0.6286929634677192 |
| NP_037224 | 0.6630836471620877 |
| NP_037226 | -1                 |
| NP_037227 | 1.130245106414632  |
| NP_037228 | 0.98813098806936   |
| NP_037229 | -1                 |
| NP_037230 | 1.3462567108470258 |
| NP_037231 | -1                 |

|           |                     |
|-----------|---------------------|
| NP_037232 | 1.0757695102558018  |
| NP_037233 | 1.116584723154712   |
| NP_037234 | 0.9830431947810448  |
| NP_037235 | -1                  |
| NP_037236 | 4.412991136634996   |
| NP_037238 | 1.1399275273007603  |
| NP_037239 | -1                  |
| NP_037240 | 1.2268052147759965  |
| NP_037241 | -1                  |
| NP_037242 | 2.222369989157486   |
| NP_037243 | 1.1630618376736288  |
| NP_037244 | -1                  |
| NP_037245 | 0.9395152343711282  |
| NP_037246 | 1.1872126400356475  |
| NP_037247 | 0.2957341356768329  |
| NP_037248 | 1.1078871069821519  |
| NP_037250 | -1                  |
| NP_037251 | -1                  |
| NP_037252 | -1                  |
| NP_037253 | -1                  |
| NP_037254 | 1.0334778329478795  |
| NP_037255 | 1.0435056628286121  |
| NP_037256 | 1.0395449233739853  |
| NP_037257 | 0.7792677380350693  |
| NP_037258 | 1.0593900562729985  |
| NP_037259 | 0.8751766813957151  |
| NP_037260 | 15.312815833649323  |
| NP_037261 | 0.546301906149037   |
| NP_037262 | 1.4750585095720457  |
| NP_037263 | 1.8989805424538126  |
| NP_037264 | 1.2173846292414894  |
| NP_037265 | 1.0604700800420523  |
| NP_037266 | 1.370125488577572   |
| NP_037267 | 1.4718026059393925  |
| NP_037268 | -1                  |
| NP_037269 | 1.4652908867279308  |
| NP_037270 | 1.8313200013316169  |
| NP_037271 | -1                  |
| NP_037273 | 1.543985805295004   |
| NP_037275 | 0.9163211938974385  |
| NP_037276 | -1                  |
| NP_037277 | 5.469033868811965   |
| NP_037279 | 1.001309187261877   |
| NP_037280 | 1.0773958092056182  |
| NP_037281 | 1.1734705337893765  |
| NP_037282 | -1                  |
| NP_037283 | 1.025667080633131   |
| NP_037284 | -1                  |
| NP_037285 | 0.7873191009220687  |
| NP_037286 | 0.38107662331743886 |
| NP_037287 | 1.2175723895454278  |
| NP_037288 | 0.9637176059300313  |
| NP_037289 | 1.0336025334121604  |
| NP_037290 | -1                  |
| NP_037291 | 1.529631115893964   |
| NP_037292 | 2.730760418467367   |
| NP_037293 | -1                  |
| NP_037295 | 0.8865595624122192  |
| NP_037297 | -1                  |
| NP_037298 | 1.4799490046134425  |
| NP_037299 | -1                  |
| NP_037300 | 0.8854533494054286  |



|           |                    |
|-----------|--------------------|
| NP_037301 | 1.136111023191222  |
| NP_037302 | -1                 |
| NP_037304 | -1                 |
| NP_037305 | 0.9490186470144146 |
| NP_037306 | 1.9541901794185517 |
| NP_037307 | 0.877449296071377  |
| NP_037308 | 1.3357154507378939 |
| NP_037309 | 0.9835628628831445 |
| NP_037310 | -1                 |
| NP_037311 | -1                 |
| NP_037312 | 1.282570189294237  |
| NP_037313 | 1.0117076171026285 |
| NP_037314 | -1                 |
| NP_037315 | -1                 |
| NP_037316 | -1                 |
| NP_037317 | 1.486957704811113  |
| NP_037318 | -1                 |
| NP_037319 | 1.2175836569004306 |
| NP_037321 | -1                 |
| NP_037322 | 1.02545573834688   |
| NP_037323 | 0.6510993581269708 |
| NP_037324 | 1.1403511429383313 |
| NP_037326 | 1.5238090147510914 |
| NP_037327 | 1.0976830615482418 |
| NP_037328 | -1                 |
| NP_037329 | 0.7906204966311744 |
| NP_037330 | 0.9267250124107632 |
| NP_037331 | -1                 |
| NP_037332 | 1.0230185472160436 |
| NP_037346 | 1.0802782528659076 |
| NP_037347 | -1                 |
| NP_037348 | 1.423631526360042  |
| NP_037349 | 2.279471756495757  |
| NP_037351 | 1.1602957782654826 |
| NP_037352 | 0.8499349286007548 |
| NP_037353 | 0.9348956037562819 |
| NP_037354 | 0.9210041399413899 |
| NP_037355 | 0.9903118326639558 |
| NP_037356 | 0.9849155242751088 |
| NP_037357 | -1                 |
| NP_037358 | 0.8876375220599333 |
| NP_038199 | 1.0080414667510882 |
| NP_038200 | -1                 |
| NP_058682 | 1.1274030997621696 |
| NP_058683 | 0.8042242588231657 |
| NP_058684 | 0.7634618066103932 |
| NP_058685 | -1                 |
| NP_058686 | 1.144247712571926  |
| NP_058687 | 0.9334418045411268 |
| NP_058688 | -1                 |
| NP_058689 | 1.3204732037170495 |
| NP_058690 | 1.5490549388343766 |
| NP_058691 | 1.0215199840336944 |
| NP_058692 | 0.761092293608284  |
| NP_058693 | -1                 |
| NP_058694 | 0.502827889978736  |
| NP_058695 | 0.5578541592558709 |
| NP_058696 | 2.214571519901533  |
| NP_058697 | -1                 |
| NP_058698 | 0.8871776102399443 |
| NP_058699 | 1.2322388629872827 |
| NP_058701 | 0.9289061871518576 |

|           |                     |
|-----------|---------------------|
| NP_058702 | 1.3572979059346022  |
| NP_058703 | 0.9290698380496893  |
| NP_058704 | 1.1153641654279849  |
| NP_058705 | 1.0602566641262379  |
| NP_058706 | -1                  |
| NP_058707 | 0.8940919805952368  |
| NP_058708 | 1.4828561535428626  |
| NP_058709 | 4.504285909616941   |
| NP_058710 | 1.3132681409597684  |
| NP_058711 | 0.48296658781380697 |
| NP_058712 | 0.7449327327767509  |
| NP_058713 | 1.2183252610417357  |
| NP_058714 | 1.0402379709970795  |
| NP_058715 | 1.3745761455847112  |
| NP_058716 | 0.8024315731420947  |
| NP_058717 | 1.20152378250811    |
| NP_058718 | 0.8759020989163557  |
| NP_058719 | -1                  |
| NP_058720 | 1.8377247128341416  |
| NP_058721 | 1.0872592066929148  |
| NP_058722 | 1.3974352407799413  |
| NP_058723 | -1                  |
| NP_058725 | -1                  |
| NP_058726 | 1.0335885056475635  |
| NP_058727 | 0.10651081107064027 |
| NP_058728 | 0.5998884865729301  |
| NP_058729 | 0.8699427958918544  |
| NP_058730 | 1.3181732842751652  |
| NP_058731 | 1.2313174927255497  |
| NP_058732 | -1                  |
| NP_058733 | 1.3208277826876307  |
| NP_058734 | 1.165816386651444   |
| NP_058735 | 1.1111390516898885  |
| NP_058736 | 1.2550478908056537  |
| NP_058737 | 1.5406698421915805  |
| NP_058738 | 1.0677170205357147  |
| NP_058739 | 0.3228501272951441  |
| NP_058740 | -1                  |
| NP_058742 | 1.2680742121661666  |
| NP_058743 | -1                  |
| NP_058744 | 3.116569774243507   |
| NP_058745 | 1.2373584015208043  |
| NP_058746 | 1.2015603891227817  |
| NP_058747 | 2.302135830138906   |
| NP_058748 | 0.8063535246021836  |
| NP_058749 | 0.8456598432568998  |
| NP_058750 | 1.5559972221229572  |
| NP_058751 | 2.341192869570476   |
| NP_058752 | -1                  |
| NP_058753 | 0.8615818934897964  |
| NP_058754 | 1.2267645650990873  |
| NP_058755 | 0.9077010187562943  |
| NP_058756 | 1.403871231696067   |
| NP_058757 | 0.3866103587759433  |
| NP_058758 | 4.001237338259901   |
| NP_058759 | 1.2348892160779958  |
| NP_058760 | 0.7718775532667999  |
| NP_058761 | -1                  |
| NP_058762 | 0.7195276242153171  |
| NP_058763 | 1.095570479612707   |
| NP_058764 | 0.8681288091614011  |
| NP_058765 | -1                  |

|           |                     |
|-----------|---------------------|
| NP_058766 | 0.9904099108666209  |
| NP_058767 | 1.0745000949565884  |
| NP_058768 | 0.9225227597065117  |
| NP_058769 | 1.2613694449234938  |
| NP_058770 | 0.7418250719416178  |
| NP_058771 | 0.6665221309611151  |
| NP_058772 | 0.6852453788590035  |
| NP_058773 | -1                  |
| NP_058774 | -1                  |
| NP_058775 | -1                  |
| NP_058776 | 0.09948638469522308 |
| NP_058777 | -1                  |
| NP_058778 | -1                  |
| NP_058779 | 1.5234452052171568  |
| NP_058780 | -1                  |
| NP_058781 | -1                  |
| NP_058782 | 1.076249020520814   |
| NP_058783 | 0.7300482308552433  |
| NP_058784 | 1.0777092252533593  |
| NP_058785 | 2.0566098135544633  |
| NP_058786 | 0.9541669185995506  |
| NP_058787 | 1.2619985708615142  |
| NP_058788 | -1                  |
| NP_058789 | 0.9562844157417041  |
| NP_058790 | 0.9298760926005768  |
| NP_058791 | 1.2944061130357778  |
| NP_058792 | -1                  |
| NP_058793 | 1.594691280569867   |
| NP_058794 | -1                  |
| NP_058795 | 1.0034921175847085  |
| NP_058796 | 1.1395274570267855  |
| NP_058797 | 1.138699704577846   |
| NP_058798 | 0.6799644850117083  |
| NP_058799 | 0.964272208591316   |
| NP_058800 | 1.228312451384684   |
| NP_058801 | 1.1808686692432877  |
| NP_058802 | 0.7999624770068539  |
| NP_058803 | 0.9398603984497429  |
| NP_058804 | 1.1610573757652112  |
| NP_058805 | 1.195179266913342   |
| NP_058806 | -1                  |
| NP_058807 | 1.2525175025302246  |
| NP_058808 | 1.1017422230872358  |
| NP_058809 | 0.9587229090543592  |
| NP_058811 | 1.2597968422234531  |
| NP_058812 | 1.1683545612738728  |
| NP_058813 | -1                  |
| NP_058815 | 1.0130380732527013  |
| NP_058816 | 1.0341169285286813  |
| NP_058817 | -1                  |
| NP_058818 | -1                  |
| NP_058819 | 1.90204951559965    |
| NP_058820 | 2.9567067607827386  |
| NP_058821 | 1.0428852251899403  |
| NP_058822 | 0.6853664035719115  |
| NP_058823 | 0.7984656496037178  |
| NP_058824 | 0.6363445981758766  |
| NP_058825 | 0.8969111481052328  |
| NP_058826 | 1.0526526201194688  |
| NP_058827 | 1.025854880505817   |
| NP_058828 | 0.8417197709149394  |
| NP_058830 | 0.6670163566538704  |

|           |                    |
|-----------|--------------------|
| NP_058831 | -1                 |
| NP_058832 | 1.20622282424054   |
| NP_058833 | -1                 |
| NP_058834 | 0.9171373773807296 |
| NP_058835 | 1.0590058918724314 |
| NP_058836 | 1.1833331995760386 |
| NP_058837 | 1.7858449035905426 |
| NP_058838 | 0.9329354758310058 |
| NP_058839 | -1                 |
| NP_058840 | -1                 |
| NP_058841 | 0.9027837165400047 |
| NP_058844 | 0.911280655270799  |
| NP_058845 | -1                 |
| NP_058846 | 0.9708183260644945 |
| NP_058847 | 0.9990057913460549 |
| NP_058848 | 1.1137932685779448 |
| NP_058849 | 1.1175532518656464 |
| NP_058850 | 1.7060742188996303 |
| NP_058851 | -1                 |
| NP_058852 | -1                 |
| NP_058854 | 1.1919749341809205 |
| NP_058855 | -1                 |
| NP_058856 | 1.1494682639642704 |
| NP_058857 | 0.872057463424421  |
| NP_058858 | -1                 |
| NP_058859 | -1                 |
| NP_058860 | -1                 |
| NP_058861 | 0.9326454569907137 |
| NP_058862 | 1.2611524011493709 |
| NP_058863 | 1.1811781462596953 |
| NP_058864 | -1                 |
| NP_058865 | 0.9365794782791967 |
| NP_058866 | 0.9868715493120145 |
| NP_058867 | 1.1201460788769257 |
| NP_058868 | 0.9762860245246344 |
| NP_058869 | 0.7126743434928099 |
| NP_058870 | 1.5563902255624367 |
| NP_058871 | 1.1808792262743335 |
| NP_058872 | 1.1193478212700618 |
| NP_058873 | 1.214200085192625  |
| NP_058874 | 2.651666249906258  |
| NP_058875 | 0.9988488109023843 |
| NP_058876 | 1.8681725055226461 |
| NP_058877 | 0.9275747196019385 |
| NP_058878 | 1.265008601301457  |
| NP_058879 | -1                 |
| NP_058880 | -1                 |
| NP_058881 | -1                 |
| NP_058882 | -1                 |
| NP_058884 | 0.8285740166491019 |
| NP_058885 | 1.2900466802310395 |
| NP_058886 | 1.1402753044334308 |
| NP_058887 | 1.1592007873136072 |
| NP_058888 | 0.7930026844008897 |
| NP_058889 | 1.1694817718734245 |
| NP_058890 | 1.1381651695006343 |
| NP_058891 | -1                 |
| NP_058892 | 1.5734962014096607 |
| NP_058893 | 2.9272226279119993 |
| NP_058894 | 0.8540825207669434 |
| NP_058895 | 1.061162102216635  |
| NP_058896 | 0.6414625483414521 |

|           |                     |
|-----------|---------------------|
| NP_058897 | 1.3215183692281662  |
| NP_058898 | 1.0472449520944689  |
| NP_058900 | 1.7557736572972908  |
| NP_058901 | 1.067031635430064   |
| NP_058902 | 1.0365725547328464  |
| NP_058903 | 0.64384669354499    |
| NP_058904 | 0.5411904185200787  |
| NP_058905 | 1.070659820120501   |
| NP_058906 | 0.999057070187841   |
| NP_058907 | 1.070717228414119   |
| NP_058909 | 1.3357130438847893  |
| NP_058910 | 0.8588944936515626  |
| NP_058911 | -1                  |
| NP_058912 | 1.8898643263916979  |
| NP_058913 | 0.6952442191717623  |
| NP_058914 | -1                  |
| NP_058916 | 0.6271565585822031  |
| NP_058917 | -1                  |
| NP_058918 | 1.2991770926112058  |
| NP_058919 | 1.658864747586889   |
| NP_058920 | -1                  |
| NP_058921 | 0.7290989662246862  |
| NP_058922 | 1.323061900378176   |
| NP_058923 | 1.0991104985808213  |
| NP_058924 | 1.0983180854384853  |
| NP_058925 | 0.5593698306177578  |
| NP_058926 | -1                  |
| NP_058927 | 1.032383173139798   |
| NP_058928 | 0.03785276396028246 |
| NP_058929 | -1                  |
| NP_058930 | 0.8406792426723987  |
| NP_058931 | 1.100415254725308   |
| NP_058932 | 0.8898007066582453  |
| NP_058933 | -1                  |
| NP_058934 | -1                  |
| NP_058935 | 1.0954323687473475  |
| NP_058936 | -1                  |
| NP_058937 | -1                  |
| NP_058938 | -1                  |
| NP_058939 | 1.1989725284157076  |
| NP_058940 | 1.4168186921006385  |
| NP_058941 | 1.0886413972826585  |
| NP_058942 | 1.0887543257465413  |
| NP_058943 | 1.2741619406884634  |
| NP_058944 | 1.0012153804245394  |
| NP_058945 | 0.9356103833157778  |
| NP_058946 | 0.9536372820792076  |
| NP_058947 | -1                  |
| NP_058948 | -1                  |
| NP_058949 | 1.0045320592537177  |
| NP_058950 | 1.2174002428938617  |
| NP_058951 | 1.3064164702482517  |
| NP_058952 | 1.107087731163098   |
| NP_058953 | 0.9239422851411563  |
| NP_058954 | 1.3196239274095432  |
| NP_058955 | 0.4615969002838204  |
| NP_058956 | 1.5876430117451792  |
| NP_058957 | -1                  |
| NP_058958 | -1                  |
| NP_058959 | 1.5382902448462452  |
| NP_058960 | 0.850236738060886   |
| NP_058962 | -1                  |

|           |                    |
|-----------|--------------------|
| NP_058963 | 0.7578337689127208 |
| NP_058964 | 0.9796474834197421 |
| NP_058965 | 1.082956897675038  |
| NP_058966 | -1                 |
| NP_058967 | 0.9699351215143251 |
| NP_058968 | 1.2383804922072235 |
| NP_058970 | 1.2376266457567289 |
| NP_058971 | -1                 |
| NP_058972 | 0.9686767614681772 |
| NP_058973 | 1.1583528826600122 |
| NP_058974 | 1.0195354116445494 |
| NP_058975 | 0.8861395798363656 |
| NP_058976 | 0.8519536865002026 |
| NP_058977 | 0.7919409153826903 |
| NP_058978 | 0.8032837636870745 |
| NP_058979 | 0.961958738457161  |
| NP_058980 | 0.7809919188636044 |
| NP_058981 | 1.1076529239199668 |
| NP_058982 | -1                 |
| NP_058984 | 23.119584997176016 |
| NP_058985 | 1.1750229399188048 |
| NP_058986 | 1.0711888244470757 |
| NP_058987 | 1.1117922910019729 |
| NP_058988 | -1                 |
| NP_058989 | 1.257396320828874  |
| NP_058990 | 0.9001252589854571 |
| NP_058991 | 1.0615293491584656 |
| NP_058992 | -1                 |
| NP_058993 | 0.9939699839893672 |
| NP_058994 | -1                 |
| NP_058995 | 0.6641851211537672 |
| NP_058996 | -1                 |
| NP_058997 | 0.8463838585953556 |
| NP_058999 | -1                 |
| NP_059000 | -1                 |
| NP_059001 | 1.8829608274625542 |
| NP_059002 | 0.8677690334297766 |
| NP_059003 | 0.6245902385144867 |
| NP_059004 | 1.0251966360634726 |
| NP_059005 | 1.4717397090209265 |
| NP_059006 | 3.244005908367542  |
| NP_059007 | 0.8803685376377439 |
| NP_059008 | 1.3482320252906972 |
| NP_059009 | 1.0265923449366858 |
| NP_059010 | 1.1433092398341547 |
| NP_059011 | 1.1396456908924908 |
| NP_059012 | 2.192923866503719  |
| NP_059013 | -1                 |
| NP_059014 | -1                 |
| NP_059015 | 0.7235631437237449 |
| NP_059016 | 1.0928700551175416 |
| NP_059017 | 0.896348112426268  |
| NP_059018 | 1.6606370952679723 |
| NP_059019 | -1                 |
| NP_059021 | 1.7720545693482457 |
| NP_059022 | 1.116210157779474  |
| NP_059023 | 1.1011093790594866 |
| NP_059024 | -1                 |
| NP_059025 | 0.9844873552308159 |
| NP_059026 | -1                 |
| NP_059028 | 1.0345197537590596 |
| NP_059029 | 0.8992625528858049 |

|           |                    |
|-----------|--------------------|
| NP_059030 | 0.6029930198609973 |
| NP_059031 | 1.4589611727944585 |
| NP_059032 | 1.1063278911652976 |
| NP_059033 | 1.1240544339313496 |
| NP_059034 | -1                 |
| NP_059035 | -1                 |
| NP_059036 | 1.329708792519023  |
| NP_059037 | -1                 |
| NP_059038 | -1                 |
| NP_059039 | 0.730956879454462  |
| NP_059040 | 1.0759543589901743 |
| NP_059041 | -1                 |
| NP_059042 | -1                 |
| NP_059043 | 1.2663207372114258 |
| NP_059044 | 1.3138493223891796 |
| NP_059046 | 1.1847142043643268 |
| NP_059047 | -1                 |
| NP_059048 | 1.96970087761938   |
| NP_059049 | 0.8200955800693173 |
| NP_059050 | -1                 |
| NP_059051 | 1.0765639986950568 |
| NP_059052 | 1.6082186920723245 |
| NP_059053 | -1                 |
| NP_059054 | 1.0408848678470475 |
| NP_059055 | 1.4315161889223649 |
| NP_059056 | 1.0593289092195493 |
| NP_059057 | 1.2953317731359164 |
| NP_059058 | 0.7004238737746454 |
| NP_059059 | 1.263932595282028  |
| NP_059060 | 0.9552011709412433 |
| NP_059061 | 1.2809651267320628 |
| NP_061995 | -1                 |
| NP_061996 | 0.9648959461058848 |
| NP_061997 | 0.9506110838866804 |
| NP_061998 | -1                 |
| NP_061999 | -1                 |
| NP_062000 | -1                 |
| NP_062001 | 1.0117812157866197 |
| NP_062002 | 1.0655930482852989 |
| NP_062003 | -1                 |
| NP_062004 | 0.9019767224845112 |
| NP_062005 | 1.1148685400053524 |
| NP_062006 | 1.0567132778896302 |
| NP_062007 | 0.7264850037312905 |
| NP_062008 | -1                 |
| NP_062009 | -1                 |
| NP_062010 | 1.9041464409614584 |
| NP_062012 | -1                 |
| NP_062013 | 1.4595100384716464 |
| NP_062014 | 1.0965848981994966 |
| NP_062015 | 1.1737759190699577 |
| NP_062016 | 1.2403862104034389 |
| NP_062017 | 1.4443319068362626 |
| NP_062018 | -1                 |
| NP_062019 | 1.4296612782323344 |
| NP_062020 | 1.298717524066112  |
| NP_062021 | -1                 |
| NP_062022 | 0.9270384160288881 |
| NP_062023 | 0.984552065245711  |
| NP_062024 | -1                 |
| NP_062025 | 1.223377256721159  |
| NP_062026 | 0.6064655001672362 |

|           |                    |
|-----------|--------------------|
| NP_062027 | 1.133590158566102  |
| NP_062028 | -1                 |
| NP_062029 | 1.583520541057285  |
| NP_062030 | 0.9477151695216443 |
| NP_062031 | -1                 |
| NP_062032 | -1                 |
| NP_062033 | -1                 |
| NP_062034 | 1.0231660481693903 |
| NP_062035 | -1                 |
| NP_062036 | 1.19559670784239   |
| NP_062037 | -1                 |
| NP_062038 | 2.666401144921458  |
| NP_062039 | 2.3968171939703558 |
| NP_062040 | 1.0283355575916089 |
| NP_062041 | 1.2950669531949675 |
| NP_062042 | -1                 |
| NP_062043 | 0.743146112217519  |
| NP_062044 | -1                 |
| NP_062045 | 1.5609744982519527 |
| NP_062046 | -1                 |
| NP_062047 | -1                 |
| NP_062048 | 1.2329016061921607 |
| NP_062050 | -1                 |
| NP_062051 | 1.8426853219700456 |
| NP_062052 | 0.7461417216372889 |
| NP_062053 | 1.4425414087818471 |
| NP_062055 | 1.179209082442323  |
| NP_062057 | 0.8913410889433914 |
| NP_062058 | 1.4172389754640813 |
| NP_062059 | 1.7964296928239785 |
| NP_062060 | 0.7869859912569138 |
| NP_062061 | -1                 |
| NP_062062 | 1.7282992323559594 |
| NP_062063 | 0.9919499972376989 |
| NP_062064 | 1.1350889990191833 |
| NP_062065 | 0.6960754224106797 |
| NP_062066 | -1                 |
| NP_062067 | 1.4109199945531923 |
| NP_062068 | 0.9725316286185444 |
| NP_062069 | 0.744468328537556  |
| NP_062071 | -1                 |
| NP_062072 | -1                 |
| NP_062074 | 1.0431702289094569 |
| NP_062075 | -1                 |
| NP_062076 | 0.9131731137372817 |
| NP_062077 | 1.7990371471487148 |
| NP_062078 | 1.1596757221425167 |
| NP_062080 | -1                 |
| NP_062081 | 1.0501390151736707 |
| NP_062083 | -1                 |
| NP_062084 | 1.5001000836208622 |
| NP_062085 | 0.7707900326403095 |
| NP_062086 | 0.9943154833840796 |
| NP_062087 | -1                 |
| NP_062089 | 0.9486298445914008 |
| NP_062091 | 1.1992458057171718 |
| NP_062092 | 1.2066278185696062 |
| NP_062093 | 0.9694536124512532 |
| NP_062094 | -1                 |
| NP_062095 | 1.0006131816632016 |
| NP_062096 | 0.5823302224226071 |
| NP_062097 | 0.972731788103424  |



|           |                      |
|-----------|----------------------|
| NP_062098 | 0.7606548485604941   |
| NP_062099 | 1.1053872086414183   |
| NP_062100 | 1.3636481504748046   |
| NP_062102 | 1.2176516991684163   |
| NP_062103 | -1                   |
| NP_062104 | -1                   |
| NP_062105 | 0.7212816543708712   |
| NP_062106 | 0.7721147791685717   |
| NP_062107 | 1.128653577162929    |
| NP_062108 | -1                   |
| NP_062109 | -1                   |
| NP_062110 | 0.8477169555323627   |
| NP_062111 | 1.1577172269134053   |
| NP_062112 | -1                   |
| NP_062113 | -1                   |
| NP_062114 | -1                   |
| NP_062115 | 1.769538719145599    |
| NP_062116 | 0.4883882505256269   |
| NP_062117 | 1.0584016140951278   |
| NP_062119 | 0.9958256483011395   |
| NP_062120 | 1.269126363909587    |
| NP_062121 | 1.0893450239410707   |
| NP_062122 | 0.7147198906822253   |
| NP_062123 | 1.164852788076545    |
| NP_062124 | 0.9952690642021519   |
| NP_062125 | 0.949075642219341    |
| NP_062126 | -1                   |
| NP_062128 | -1                   |
| NP_062129 | 1.108423203416104    |
| NP_062131 | 1.1558212244262653   |
| NP_062132 | 0.9660149793400225   |
| NP_062134 | -1                   |
| NP_062135 | 1.046835009941941    |
| NP_062137 | 1.2278769160876577   |
| NP_062138 | -1                   |
| NP_062139 | 0.9485835485924676   |
| NP_062141 | 1.160617076102736    |
| NP_062142 | 1.2421761213361298   |
| NP_062143 | 0.9189323496736937   |
| NP_062144 | 0.9578987404638036   |
| NP_062145 | 1.084624377058343    |
| NP_062146 | -1                   |
| NP_062147 | 1.8333823688503095   |
| NP_062148 | 1.1902508842357236   |
| NP_062149 | 1.0236728397824448   |
| NP_062150 | 2.376187361543166    |
| NP_062151 | -1                   |
| NP_062152 | 2.095862505036701    |
| NP_062153 | 0.8167475704221457   |
| NP_062154 | -1                   |
| NP_062155 | 0.015347900629285717 |
| NP_062156 | 1.2257030347262772   |
| NP_062158 | 1.1204185567757916   |
| NP_062159 | 0.6261966230145685   |
| NP_062161 | 1.1378939976050655   |
| NP_062162 | 0.7645356437997745   |
| NP_062163 | 1.171747196996647    |
| NP_062164 | 1.263138157411974    |
| NP_062165 | 1.085191422975123    |
| NP_062166 | -1                   |
| NP_062167 | 1.0575811780984152   |
| NP_062168 | 1.1941881188525487   |

|           |                    |
|-----------|--------------------|
| NP_062169 | 1.2184683415506072 |
| NP_062170 | -1                 |
| NP_062171 | 1.1999186546047544 |
| NP_062172 | 0.9509049390197017 |
| NP_062174 | 0.6854672938502998 |
| NP_062175 | 1.1014805308847262 |
| NP_062176 | -1                 |
| NP_062177 | 1.069804242365383  |
| NP_062178 | 1.0698756856939233 |
| NP_062179 | 1.018428375709723  |
| NP_062181 | -1                 |
| NP_062182 | -1                 |
| NP_062183 | -1                 |
| NP_062184 | 1.3168824741927005 |
| NP_062185 | 1.3418897510850651 |
| NP_062186 | -1                 |
| NP_062187 | 0.6716078880464469 |
| NP_062188 | -1                 |
| NP_062189 | 1.3027186569529856 |
| NP_062190 | -1                 |
| NP_062191 | 1.5050564587083386 |
| NP_062194 | -1                 |
| NP_062195 | 0.9403728155584802 |
| NP_062196 | 0.7753687933012547 |
| NP_062199 | 1.0940253072694155 |
| NP_062201 | 0.9815684505105308 |
| NP_062202 | 1.1957051655977706 |
| NP_062204 | 0.9730309761572842 |
| NP_062205 | 0.9432291601376256 |
| NP_062206 | -1                 |
| NP_062207 | -1                 |
| NP_062208 | 0.8104163005326912 |
| NP_062212 | 1.3426198873507682 |
| NP_062213 | 0.8782691761269712 |
| NP_062214 | 1.1217059781707055 |
| NP_062216 | 1.057429688583567  |
| NP_062217 | -1                 |
| NP_062218 | -1                 |
| NP_062219 | 1.315100862269563  |
| NP_062220 | 1.0509998769488131 |
| NP_062221 | -1                 |
| NP_062222 | 1.0110795528270051 |
| NP_062223 | -1                 |
| NP_062224 | 0.9554188846623334 |
| NP_062225 | 0.7880710075484769 |
| NP_062226 | -1                 |
| NP_062227 | 1.018798559479446  |
| NP_062229 | 0.8911480041890291 |
| NP_062230 | 2.4720953156681156 |
| NP_062231 | 0.6843956988832187 |
| NP_062232 | 1.0742268252817884 |
| NP_062233 | 1.2096555605619992 |
| NP_062234 | -1                 |
| NP_062235 | 0.9379342145597734 |
| NP_062236 | 1.079943480462135  |
| NP_062237 | 0.8841151665780015 |
| NP_062238 | 0.895874335029153  |
| NP_062240 | 0.945936199767139  |
| NP_062241 | 0.9118046491713699 |
| NP_062242 | 1.0855732794113813 |
| NP_062243 | 0.8020798534769652 |
| NP_062244 | 1.3448657806122006 |

|           |                    |
|-----------|--------------------|
| NP_062245 | 1.3212631092823413 |
| NP_062246 | 1.193760793743878  |
| NP_062247 | -1                 |
| NP_062248 | -1                 |
| NP_062249 | 1.0672225502781032 |
| NP_062250 | 1.146068237819341  |
| NP_062251 | -1                 |
| NP_062252 | 0.6385195048429476 |
| NP_062253 | 0.9327753310085983 |
| NP_062256 | 0.8818456449736342 |
| NP_062257 | 1.1060400514133504 |
| NP_062258 | 0.6739594580055551 |
| NP_062259 | 1.109962921804528  |
| NP_062260 | 1.3132774590345235 |
| NP_062566 | 1.2786812954011686 |
| NP_062567 | 1.1093640674026446 |
| NP_062568 | 1.1132309928345285 |
| NP_062569 | -1                 |
| NP_062604 | -1                 |
| NP_063969 | 1.1096773306339642 |
| NP_063970 | 1.2020684708048563 |
| NP_063971 | 1.1196719087395754 |
| NP_063972 | 1.009751794570721  |
| NP_064456 | 0.9131149266015611 |
| NP_064457 | 0.7002977179242968 |
| NP_064458 | 0.9747654428365602 |
| NP_064459 | 1.3839853054395261 |
| NP_064460 | 1.3878996149340246 |
| NP_064461 | -1                 |
| NP_064462 | 1.2633071170811598 |
| NP_064463 | 1.074368870171142  |
| NP_064464 | 1.1658785348095466 |
| NP_064465 | 1.325887618687996  |
| NP_064466 | 1.4465754383325653 |
| NP_064467 | 0.2461527100805876 |
| NP_064469 | 1.0710457067860053 |
| NP_064471 | 0.7945660273575719 |
| NP_064472 | 1.3366955975845236 |
| NP_064473 | 1.8965396168381616 |
| NP_064474 | 1.0024098797404173 |
| NP_064475 | -1                 |
| NP_064476 | 1.8299918145082492 |
| NP_064477 | 1.2124448779648704 |
| NP_064478 | 1.4708283256613364 |
| NP_064480 | -1                 |
| NP_064481 | 1.030254532841736  |
| NP_064482 | 1.7962722368148405 |
| NP_064483 | 0.9074925500717744 |
| NP_064484 | 0.9279280090869906 |
| NP_064485 | 0.9724854286485209 |
| NP_064486 | 1.0591533177788794 |
| NP_064487 | -1                 |
| NP_064488 | 1.5519895701596897 |
| NP_064489 | 0.9323478265273614 |
| NP_064491 | 1.23634140767408   |
| NP_064697 | -1                 |
| NP_064698 | -1                 |
| NP_064702 | 0.8440662686032973 |
| NP_064704 | 1.2454691743503152 |
| NP_065204 | 0.9368767239984362 |
| NP_065412 | -1                 |
| NP_065413 | 1.0221387858316255 |

|           |                    |
|-----------|--------------------|
| NP_065415 | -1                 |
| NP_065417 | 1.2853904991310754 |
| NP_065418 | -1                 |
| NP_065707 | 1.2420934980202605 |
| NP_066125 | -1                 |
| NP_067087 | 0.9156030592794829 |
| NP_067088 | 1.143469890345421  |
| NP_067089 | 0.8964991101666492 |
| NP_067587 | 0.9966648251984788 |
| NP_067588 | 0.818423171499049  |
| NP_067589 | 14.256271132100004 |
| NP_067590 | 1.013161477134868  |
| NP_067591 | 3.36822051729742   |
| NP_067592 | 0.7611986543602186 |
| NP_067593 | 1.1042671559300101 |
| NP_067594 | 1.8846245830356478 |
| NP_067596 | 1.2488260939044653 |
| NP_067597 | 2.7555404391246707 |
| NP_067598 | 1.0129730873761793 |
| NP_067599 | -1                 |
| NP_067600 | 1.4167988571455399 |
| NP_067601 | 1.3348157437100754 |
| NP_067603 | -1                 |
| NP_067604 | -1                 |
| NP_067605 | 0.7603230904110335 |
| NP_067606 | -1                 |
| NP_067607 | 0.9894677562341196 |
| NP_067608 | 0.9342308506282351 |
| NP_067609 | -1                 |
| NP_067685 | 1.189230220677789  |
| NP_067686 | 2.3311206851818542 |
| NP_067687 | -1                 |
| NP_067688 | -1                 |
| NP_067689 | 1.1215538695604603 |
| NP_067690 | 0.8468212330675513 |
| NP_067691 | -1                 |
| NP_067693 | 0.9528115522329205 |
| NP_067694 | 1.0619913322475372 |
| NP_067695 | 1.0974884203410715 |
| NP_067696 | -1                 |
| NP_067698 | 1.1750960951637273 |
| NP_067700 | 0.9736307160713791 |
| NP_067701 | -1                 |
| NP_067702 | -1                 |
| NP_067703 | 1.0300730838824361 |
| NP_067704 | 1.2086219295007241 |
| NP_067705 | -1                 |
| NP_067708 | 1.1233377612463826 |
| NP_067709 | 1.718938560484631  |
| NP_067710 | -1                 |
| NP_067711 | 1.194775024293602  |
| NP_067712 | 1.2160683492518891 |
| NP_067713 | 1.3824922177910386 |
| NP_067714 | -1                 |
| NP_067716 | -1                 |
| NP_067718 | 1.6630233808691635 |
| NP_067719 | -1                 |
| NP_067720 | 1.2725169052389778 |
| NP_067721 | 0.996841066216772  |
| NP_067722 | 0.9637295055195613 |
| NP_067723 | 0.572008476846251  |
| NP_067724 | 1.254106865958247  |

|           |                    |
|-----------|--------------------|
| NP_067725 | 1.3832179604990187 |
| NP_067726 | 0.9831507498973496 |
| NP_067727 | -1                 |
| NP_067728 | 8.60670276323207   |
| NP_067729 | -1                 |
| NP_067730 | 1.1376277131166592 |
| NP_067731 | 1.539015954437969  |
| NP_067732 | -1                 |
| NP_067733 | -1                 |
| NP_067734 | -1                 |
| NP_067735 | 1.0985879814713753 |
| NP_068507 | -1                 |
| NP_068508 | 1.0205357859067534 |
| NP_068509 | 1.0079591389322429 |
| NP_068510 | -1                 |
| NP_068512 | 1.7248430607267538 |
| NP_068513 | -1                 |
| NP_068514 | 1.4303391515821413 |
| NP_068515 | 1.2749377996644689 |
| NP_068516 | 1.1148977788315297 |
| NP_068518 | 0.6993829138377726 |
| NP_068519 | 1.3011716020693906 |
| NP_068520 | 1.1669516881078796 |
| NP_068521 | -1                 |
| NP_068522 | 0.9912764377178314 |
| NP_068523 | 1.110746898404818  |
| NP_068525 | 0.900579664850529  |
| NP_068526 | -1                 |
| NP_068527 | 1.0323409919269073 |
| NP_068528 | 0.7944209316976345 |
| NP_068530 | 0.9801550855327291 |
| NP_068531 | 1.0048546541829773 |
| NP_068532 | 1.0696533459573712 |
| NP_068533 | 0.8012969698774777 |
| NP_068534 | 0.8988158585220964 |
| NP_068535 | -1                 |
| NP_068537 | -1                 |
| NP_068538 | 0.8406444865904216 |
| NP_068539 | -1                 |
| NP_068540 | -1                 |
| NP_068542 | 1.1622158558162476 |
| NP_068543 | -1                 |
| NP_068544 | -1                 |
| NP_068606 | -1                 |
| NP_068607 | 1.9591027524354572 |
| NP_068608 | 0.9213787119987651 |
| NP_068609 | -1                 |
| NP_068610 | 0.9351391108883114 |
| NP_068611 | 0.7661794231305096 |
| NP_068612 | -1                 |
| NP_068613 | 1.1335748731561195 |
| NP_068614 | 1.124392907781331  |
| NP_068615 | 1.3775422899194352 |
| NP_068618 | 1.059312599340079  |
| NP_068619 | 1.0523133625539653 |
| NP_068620 | -1                 |
| NP_068621 | 0.9536383345239715 |
| NP_068622 | -1                 |
| NP_068623 | 1.1237973744229308 |
| NP_068624 | 1.3669991780298494 |
| NP_068625 | -1                 |
| NP_068626 | -1                 |

|           |                     |
|-----------|---------------------|
| NP_068627 | -1                  |
| NP_068628 | 1.2730310523658073  |
| NP_068629 | 1.0913348071016298  |
| NP_068630 | -1                  |
| NP_068631 | 1.7187032650297693  |
| NP_068632 | 0.9829437481244749  |
| NP_068635 | 1.172120092246285   |
| NP_068637 | 1.1201088440615194  |
| NP_068638 | 1.4997666377488137  |
| NP_068639 | 1.215533284746379   |
| NP_068640 | 1.2911698094475526  |
| NP_068641 | 0.8641383652134355  |
| NP_068709 | 1.7563788011107955  |
| NP_068824 | 1.0548987573965072  |
| NP_068837 | 0.8077973225986943  |
| NP_071288 | -1                  |
| NP_071291 | 1.487287698823659   |
| NP_071511 | 0.6880859377330765  |
| NP_071513 | 1.012484883274979   |
| NP_071514 | 1.184100991315906   |
| NP_071515 | 0.905799221295072   |
| NP_071516 | -1                  |
| NP_071517 | 1.1925724176078385  |
| NP_071518 | 0.8140381142044163  |
| NP_071519 | 0.9243191141586192  |
| NP_071520 | 0.11295580289141159 |
| NP_071521 | 0.697213059254414   |
| NP_071522 | 0.9175624597002378  |
| NP_071524 | 1.7954627105869998  |
| NP_071525 | 1.1378238202699464  |
| NP_071526 | 1.1400370594688656  |
| NP_071527 | 0.9196572067339864  |
| NP_071528 | -1                  |
| NP_071529 | 0.9488095821655479  |
| NP_071530 | -1                  |
| NP_071531 | -1                  |
| NP_071532 | 0.9796376662821258  |
| NP_071534 | -1                  |
| NP_071535 | 1.012746374347177   |
| NP_071538 | -1                  |
| NP_071539 | -1                  |
| NP_071540 | 0.9453328641091558  |
| NP_071541 | 1.1517568965829468  |
| NP_071542 | -1                  |
| NP_071543 | 2.6972905990096763  |
| NP_071544 | 1.5301676464923677  |
| NP_071545 | -1                  |
| NP_071546 | 1.0167724569424537  |
| NP_071547 | 1.335330295020089   |
| NP_071549 | -1                  |
| NP_071550 | -1                  |
| NP_071551 | -1                  |
| NP_071552 | -1                  |
| NP_071553 | 0.788985357525443   |
| NP_071554 | -1                  |
| NP_071555 | 0.7746840950237038  |
| NP_071556 | -1                  |
| NP_071557 | 1.407190204446432   |
| NP_071558 | 1.2225455226734974  |
| NP_071559 | 1.1133486780635966  |
| NP_071560 | 1.7682182011361627  |
| NP_071561 | -1                  |

|           |                     |
|-----------|---------------------|
| NP_071562 | 0.6742403900572395  |
| NP_071563 | -1                  |
| NP_071564 | 1.0935140618723422  |
| NP_071565 | 0.9558859675637379  |
| NP_071566 | -1                  |
| NP_071567 | 1.0896949497349993  |
| NP_071568 | 0.6931210833590562  |
| NP_071570 | -1                  |
| NP_071571 | 0.8807665917104677  |
| NP_071572 | 0.7059918782121728  |
| NP_071574 | -1                  |
| NP_071575 | -1                  |
| NP_071576 | -1                  |
| NP_071578 | 1.0826293594513174  |
| NP_071580 | 1.2803792930862243  |
| NP_071581 | 1.5125811921900507  |
| NP_071582 | 1.300164307392365   |
| NP_071583 | 1.3492240071338768  |
| NP_071584 | 1.0403383693454737  |
| NP_071585 | 0.7154207340154617  |
| NP_071586 | 1.1559829976376932  |
| NP_071587 | 0.9486706562988881  |
| NP_071588 | 1.1231201670517126  |
| NP_071589 | -1                  |
| NP_071590 | 0.6904189887386183  |
| NP_071591 | -1                  |
| NP_071592 | 0.9683367550095879  |
| NP_071593 | 0.6526418061138713  |
| NP_071594 | -1                  |
| NP_071595 | 0.9637797358818401  |
| NP_071596 | 1.1852478148877177  |
| NP_071597 | -1                  |
| NP_071598 | 0.25368937884518483 |
| NP_071600 | -1                  |
| NP_071601 | 0.8982257029977974  |
| NP_071602 | 0.6593120461234901  |
| NP_071604 | 0.3773641484479702  |
| NP_071605 | 2.042131519092767   |
| NP_071606 | -1                  |
| NP_071607 | 1.0921308873665885  |
| NP_071608 | 1.2620095318647109  |
| NP_071609 | 0.9791467555566192  |
| NP_071610 | 0.9306260269684258  |
| NP_071611 | -1                  |
| NP_071612 | 1.308101203221465   |
| NP_071613 | 1.2740364962817952  |
| NP_071614 | 1.5984541137629045  |
| NP_071615 | 0.9774533134421138  |
| NP_071616 | -1                  |
| NP_071617 | 1.6851759778852735  |
| NP_071618 | -1                  |
| NP_071620 | -1                  |
| NP_071622 | 1.158431267488904   |
| NP_071623 | 0.8787690507783309  |
| NP_071624 | 1.3516029343625577  |
| NP_071625 | 1.3351106289986134  |
| NP_071626 | 0.9210003436280795  |
| NP_071627 | 1.0741729172525158  |
| NP_071628 | -1                  |
| NP_071629 | -1                  |
| NP_071630 | 1.075666493967247   |
| NP_071632 | 0.8968106796518175  |

|           |                     |
|-----------|---------------------|
| NP_071633 | 0.5219540243794882  |
| NP_071636 | 0.16613688470662888 |
| NP_071637 | 0.9082773661708073  |
| NP_071638 | 1.0004793178231843  |
| NP_071639 | -1                  |
| NP_071775 | 0.8586661636918599  |
| NP_071776 | 1.4771385131598687  |
| NP_071777 | 1.2661311502262809  |
| NP_071778 | 1.3117549062856755  |
| NP_071779 | 1.0074593330779986  |
| NP_071780 | 0.9344337977439006  |
| NP_071781 | 2.4839063287161864  |
| NP_071782 | 0.9611114709742057  |
| NP_071783 | -1                  |
| NP_071784 | 0.8417635786524539  |
| NP_071785 | 0.8280526547853392  |
| NP_071786 | 1.25729153642095    |
| NP_071787 | 2.021070550141917   |
| NP_071788 | 1.454870536306091   |
| NP_071789 | 1.01017807277447    |
| NP_071790 | 1.211982125114465   |
| NP_071791 | 0.7025044637394403  |
| NP_071792 | 0.9878573347967193  |
| NP_071793 | 1.1933294620922588  |
| NP_071794 | 0.8258225914482007  |
| NP_071795 | 0.7724566271343972  |
| NP_071796 | 1.63832042089843    |
| NP_071798 | -1                  |
| NP_071799 | 1.0503119076847027  |
| NP_071852 | -1                  |
| NP_071886 | 0.7091409589622929  |
| NP_071943 | 0.8568164288217774  |
| NP_071944 | -1                  |
| NP_071946 | 2.239812557961733   |
| NP_071947 | 0.7311350934928532  |
| NP_071948 | 0.9628936657360229  |
| NP_071950 | 1.0138371890259827  |
| NP_071951 | 1.0558903018226986  |
| NP_071952 | -1                  |
| NP_071953 | 1.1313545374966316  |
| NP_071954 | 1.4388191568802084  |
| NP_071956 | 1.070813584516099   |
| NP_071957 | 0.7596576077929718  |
| NP_071958 | 1.8684611903697357  |
| NP_071959 | 1.0992257770554106  |
| NP_071960 | 1.0584897282720795  |
| NP_071961 | 1.0633885107362853  |
| NP_071963 | 0.9676130533186948  |
| NP_071964 | -1                  |
| NP_071966 | 1.2984827742562304  |
| NP_071967 | 1.1450587671326893  |
| NP_071968 | 2.1875395559806754  |
| NP_071969 | 0.8238991647432542  |
| NP_071970 | 1.2684676354662632  |
| NP_071971 | 1.5833955968067779  |
| NP_071973 | 1.0585411772908586  |
| NP_071974 | 0.8505927607444895  |
| NP_071975 | 4.06891338134279    |
| NP_071976 | 0.9552620323123606  |
| NP_071977 | 1.1208723624089614  |
| NP_071978 | -1                  |
| NP_071979 | 0.48133872546238776 |



|           |                    |
|-----------|--------------------|
| NP_071980 | 0.776114246794957  |
| NP_071981 | 0.7192126225175829 |
| NP_071982 | 1.0035092578739506 |
| NP_071983 | 1.1402862569702157 |
| NP_071984 | 1.0913514970221032 |
| NP_071985 | 0.720838109469744  |
| NP_071986 | 0.7387328208884679 |
| NP_071987 | 0.618617261380806  |
| NP_071989 | 0.8305757257644695 |
| NP_071990 | 0.8925456575126137 |
| NP_071991 | 1.054169472543282  |
| NP_071992 | 1.0195995807684348 |
| NP_071993 | 0.8969422717896433 |
| NP_072104 | -1                 |
| NP_072105 | -1                 |
| NP_072106 | 1.5934855615185823 |
| NP_072107 | 1.6734524447376007 |
| NP_072108 | 1.1323048496392676 |
| NP_072109 | -1                 |
| NP_072110 | 0.9669366660336745 |
| NP_072111 | 1.2053063034038334 |
| NP_072112 | 1.0273918744562325 |
| NP_072113 | 0.9444935301253105 |
| NP_072114 | 1.6202823963099537 |
| NP_072115 | 0.8507991500206775 |
| NP_072116 | 0.8281624153351297 |
| NP_072117 | 0.8776912329231003 |
| NP_072118 | 0.8401333711558675 |
| NP_072119 | 1.1192556454305242 |
| NP_072120 | 1.0179901260393098 |
| NP_072121 | 1.0347550573195603 |
| NP_072122 | 1.1558573842772393 |
| NP_072123 | 0.96525118862083   |
| NP_072124 | 1.6926578398726164 |
| NP_072125 | -1                 |
| NP_072126 | 13.017777928333361 |
| NP_072127 | -1                 |
| NP_072128 | 1.074559258339622  |
| NP_072129 | 0.9046244631815427 |
| NP_072131 | -1                 |
| NP_072132 | 1.9585046362649599 |
| NP_072133 | 0.9111100065128221 |
| NP_072134 | -1                 |
| NP_072135 | 0.9930213442490698 |
| NP_072136 | -1                 |
| NP_072137 | 1.3344923902678594 |
| NP_072138 | 1.1892409368295824 |
| NP_072139 | 0.9293147087370475 |
| NP_072140 | 1.135570631680597  |
| NP_072141 | 0.9635391084952576 |
| NP_072142 | -1                 |
| NP_072143 | 1.0380882968638685 |
| NP_072144 | 1.0741321851362633 |
| NP_072145 | 1.0072687237728655 |
| NP_072147 | -1                 |
| NP_072148 | 1.2442454667944487 |
| NP_072149 | 1.10705681786245   |
| NP_072150 | 1.0513020862245155 |
| NP_072151 | 0.5775455263876913 |
| NP_072152 | 1.1388300972428482 |
| NP_072153 | 0.2699161793219213 |
| NP_072155 | -1                 |

|           |                    |
|-----------|--------------------|
| NP_072156 | 1.6482704806314539 |
| NP_072157 | 1.34276267097547   |
| NP_072158 | 0.9824008871396358 |
| NP_072159 | 1.021394416598315  |
| NP_072160 | -1                 |
| NP_072161 | -1                 |
| NP_072169 | -1                 |
| NP_073156 | 0.9674204955439598 |
| NP_073157 | 1.290011209497469  |
| NP_073158 | 1.398392501814416  |
| NP_073159 | 0.6932326170782829 |
| NP_073160 | 0.7664787760808177 |
| NP_073161 | 1.1277923151413607 |
| NP_073162 | -1                 |
| NP_073163 | 0.9456828425759277 |
| NP_073164 | 1.1568546052749087 |
| NP_073165 | 1.0469967412102754 |
| NP_073166 | -1                 |
| NP_073167 | 1.0857577264467728 |
| NP_073168 | -1                 |
| NP_073169 | 1.6113728155388756 |
| NP_073170 | 0.9788172453522207 |
| NP_073171 | -1                 |
| NP_073172 | 1.4265010379700884 |
| NP_073173 | -1                 |
| NP_073174 | 0.8070217037701353 |
| NP_073175 | 1.3463795649472547 |
| NP_073176 | 0.8736426054462169 |
| NP_073178 | -1                 |
| NP_073179 | 1.1936142482033412 |
| NP_073180 | 0.6560485085810752 |
| NP_073181 | 0.9664187803146244 |
| NP_073182 | 1.0676336583082966 |
| NP_073183 | 1.2705922355107118 |
| NP_073184 | 2.690215128840928  |
| NP_073185 | 1.1480851769258378 |
| NP_073186 | 0.9105539710721441 |
| NP_073187 | 0.7666671292947922 |
| NP_073188 | 1.140448903014257  |
| NP_073189 | 0.8877164153778571 |
| NP_073190 | 1.076644603410183  |
| NP_073191 | 1.2375232894382366 |
| NP_073192 | 1.0809362666023103 |
| NP_073193 | 1.1687785402396338 |
| NP_073194 | 1.0308543175574372 |
| NP_073195 | -1                 |
| NP_073196 | 1.5712572205168052 |
| NP_073197 | 0.8874780427520944 |
| NP_073198 | 1.2692209955991922 |
| NP_073199 | -1                 |
| NP_073200 | 1.1349904659917223 |
| NP_073201 | -1                 |
| NP_073202 | 1.059556060817629  |
| NP_073204 | 1.2668176178830985 |
| NP_073205 | 1.008340917427397  |
| NP_073206 | 1.052418364302677  |
| NP_073634 | 0.9338647117073314 |
| NP_073635 | -1                 |
| NP_073636 | 1.0035455094476347 |
| NP_073637 | 1.0770849348845457 |
| NP_074037 | -1                 |
| NP_074038 | 0.9991464939352009 |

|           |                    |
|-----------|--------------------|
| NP_074039 | 1.0596316422365757 |
| NP_074041 | -1                 |
| NP_074043 | -1                 |
| NP_074044 | 1.313818616681968  |
| NP_074045 | -1                 |
| NP_074046 | 1.351993288325324  |
| NP_074047 | 0.9546762538924742 |
| NP_074048 | 0.9988231554750104 |
| NP_074049 | 0.7036439294876643 |
| NP_074050 | -1                 |
| NP_074051 | -1                 |
| NP_074052 | -1                 |
| NP_074053 | 1.0319138560517678 |
| NP_074054 | 1.1811695756584137 |
| NP_074055 | 1.0316829139451595 |
| NP_074056 | 0.5998033164020207 |
| NP_074057 | -1                 |
| NP_074058 | 0.9480103552229499 |
| NP_074059 | 1.0480624101059874 |
| NP_074060 | 1.2612974374681902 |
| NP_075209 | 1.1728127358335017 |
| NP_075210 | 1.1643509508822936 |
| NP_075211 | 0.8568241707532401 |
| NP_075212 | -1                 |
| NP_075213 | 1.1462362812776938 |
| NP_075214 | -1                 |
| NP_075215 | 1.2236670081170393 |
| NP_075216 | 0.4820837210277766 |
| NP_075217 | 1.2609562856439742 |
| NP_075218 | -1                 |
| NP_075219 | -1                 |
| NP_075220 | 1.0923033493624774 |
| NP_075222 | 1.1760762991416933 |
| NP_075223 | 1.1140887276938098 |
| NP_075224 | 0.9099228492891834 |
| NP_075225 | -1                 |
| NP_075227 | 1.0794800693385336 |
| NP_075228 | 1.2183880794700033 |
| NP_075229 | 1.245480135331879  |
| NP_075230 | -1                 |
| NP_075231 | 1.171486070183548  |
| NP_075232 | -1                 |
| NP_075233 | 1.3809149505692628 |
| NP_075234 | -1                 |
| NP_075235 | 1.337269652132473  |
| NP_075236 | 1.220195469062369  |
| NP_075237 | 1.3167026127856774 |
| NP_075238 | 1.0579405840790708 |
| NP_075239 | 1.397762467171899  |
| NP_075240 | 1.0159661438682397 |
| NP_075241 | 0.6969058079262477 |
| NP_075242 | -1                 |
| NP_075243 | -1                 |
| NP_075244 | 1.076011620097201  |
| NP_075245 | -1                 |
| NP_075246 | -1                 |
| NP_075247 | 0.9464990600022246 |
| NP_075248 | 1.595939553357533  |
| NP_075249 | 0.5736539209487826 |
| NP_075250 | 1.3362993594198393 |
| NP_075251 | 1.4042695501739286 |
| NP_075409 | -1                 |

|           |                    |
|-----------|--------------------|
| NP_075410 | 2.319329506144786  |
| NP_075411 | -1                 |
| NP_075412 | -1                 |
| NP_075413 | 1.152733170331237  |
| NP_075414 | 1.0708269988750672 |
| NP_075415 | -1                 |
| NP_075416 | 1.066014808288852  |
| NP_075578 | 1.3957310923709794 |
| NP_075579 | 1.4607870013069852 |
| NP_075580 | 1.0748537005697072 |
| NP_075581 | 0.8959763727001259 |
| NP_075582 | 2.2582099177149364 |
| NP_075583 | -1                 |
| NP_075584 | -1                 |
| NP_075587 | 1.2872613920282852 |
| NP_075588 | -1                 |
| NP_075589 | 1.4055268973194142 |
| NP_075590 | 0.8993944690503032 |
| NP_075591 | 0.9309562471023741 |
| NP_075592 | 0.9123712262485327 |
| NP_076440 | 1.0695308035827762 |
| NP_076441 | 0.9526182639139175 |
| NP_076442 | -1                 |
| NP_076443 | 1.2699273754495937 |
| NP_076445 | 1.0019950718467723 |
| NP_076446 | 1.0012266305113608 |
| NP_076447 | -1                 |
| NP_076448 | -1                 |
| NP_076450 | 1.292846961505518  |
| NP_076451 | -1                 |
| NP_076452 | -1                 |
| NP_076453 | 0.9661195898227332 |
| NP_076454 | 0.9384498439580864 |
| NP_076455 | 1.3597287296806473 |
| NP_076456 | -1                 |
| NP_076457 | -1                 |
| NP_076458 | -1                 |
| NP_076459 | 1.0586687851159717 |
| NP_076460 | -1                 |
| NP_076461 | 1.074934596479329  |
| NP_076462 | 0.7247526819459448 |
| NP_076463 | -1                 |
| NP_076464 | 1.2292781465984393 |
| NP_076465 | 1.352280966668528  |
| NP_076466 | 1.097478781047602  |
| NP_076467 | 1.140932672320235  |
| NP_076468 | 1.3406292329990588 |
| NP_076469 | 1.395598976688649  |
| NP_076470 | -1                 |
| NP_076471 | 1.071502360635546  |
| NP_076472 | 1.3398385261335148 |
| NP_076473 | 0.6900154386569085 |
| NP_076477 | 1.1113747984020492 |
| NP_076478 | 0.9874625520306743 |
| NP_076479 | 1.4299357942355106 |
| NP_076480 | -1                 |
| NP_076481 | -1                 |
| NP_076482 | -1                 |
| NP_076483 | -1                 |
| NP_076484 | 1.0039042113001422 |
| NP_076485 | -1                 |
| NP_076486 | -1                 |

|           |                    |
|-----------|--------------------|
| NP_076487 | -1                 |
| NP_076488 | -1                 |
| NP_076489 | -1                 |
| NP_076490 | 1.131887360712445  |
| NP_076491 | 0.8995018268025483 |
| NP_076492 | 1.2226050794738688 |
| NP_077039 | 0.9616109128573814 |
| NP_077040 | -1                 |
| NP_077041 | 1.574855177829807  |
| NP_077042 | 1.1243224726874077 |
| NP_077043 | 0.9098145813067507 |
| NP_077044 | 0.8557832882096628 |
| NP_077045 | 0.8912897305095907 |
| NP_077046 | -1                 |
| NP_077048 | 2.189427143416688  |
| NP_077049 | 0.8697239263060313 |
| NP_077050 | -1                 |
| NP_077051 | 1.2395012169869504 |
| NP_077052 | -1                 |
| NP_077053 | 1.4699008971639005 |
| NP_077054 | -1                 |
| NP_077055 | 1.4779161572850505 |
| NP_077056 | -1                 |
| NP_077057 | 1.1599913081775444 |
| NP_077058 | 0.882482030602172  |
| NP_077059 | 1.862974955829779  |
| NP_077060 | 5.779654032416249  |
| NP_077061 | 0.9906526451328705 |
| NP_077062 | 0.9213305281075522 |
| NP_077063 | 0.749967461837358  |
| NP_077064 | 1.3296572291222846 |
| NP_077065 | 0.7504071775561592 |
| NP_077066 | 1.5202687066501452 |
| NP_077067 | 1.7446091556911014 |
| NP_077068 | 1.0070520716523845 |
| NP_077069 | 1.2414277204600146 |
| NP_077070 | 0.6428983155545828 |
| NP_077071 | 0.9078980812178893 |
| NP_077072 | 1.3188238809650226 |
| NP_077073 | 1.5581408193117696 |
| NP_077074 | 1.1551400812183343 |
| NP_077075 | 1.098687603172575  |
| NP_077076 | 1.069279671632746  |
| NP_077077 | 1.1428650183650761 |
| NP_077322 | 0.7390156188875939 |
| NP_077325 | 1.3512341881602143 |
| NP_077328 | -1                 |
| NP_077329 | 1.3201555390777584 |
| NP_077330 | -1                 |
| NP_077331 | 2.0079320439222084 |
| NP_077332 | 2.0311004259411654 |
| NP_077334 | 1.0724884588761492 |
| NP_077335 | 0.8245363943899013 |
| NP_077336 | 0.7752452300423247 |
| NP_077337 | 0.8865419564954032 |
| NP_077338 | 0.8042196374112797 |
| NP_077339 | 0.7922044782658298 |
| NP_077340 | 1.3528616034211982 |
| NP_077341 | 1.2214436007567298 |
| NP_077342 | 0.838102620698184  |
| NP_077344 | 1.4811403170618533 |
| NP_077345 | 0.7693260728260586 |

|           |                     |
|-----------|---------------------|
| NP_077346 | 1.1850111707953823  |
| NP_077347 | 3.993305035089847   |
| NP_077348 | -1                  |
| NP_077349 | 0.7952675966856745  |
| NP_077350 | 1.0211546413043597  |
| NP_077351 | -1                  |
| NP_077352 | -1                  |
| NP_077353 | 1.1159621187051427  |
| NP_077354 | -1                  |
| NP_077356 | -1                  |
| NP_077357 | 1.3637210123908041  |
| NP_077358 | -1                  |
| NP_077359 | 0.7831063754663324  |
| NP_077360 | 1.0079595420771046  |
| NP_077361 | 0.9523782624940896  |
| NP_077362 | 0.781201210082767   |
| NP_077363 | 1.0222955336041317  |
| NP_077364 | 0.16976536886681778 |
| NP_077366 | 0.8688459460886934  |
| NP_077367 | -1                  |
| NP_077368 | 1.0159460364546928  |
| NP_077370 | 1.145476732676381   |
| NP_077372 | -1                  |
| NP_077373 | 1.1163159283232973  |
| NP_077374 | 0.888160690295911   |
| NP_077375 | 0.7295663660061761  |
| NP_077376 | 0.1874650735709682  |
| NP_077377 | 1.5598750733343654  |
| NP_077378 | 0.868227502217711   |
| NP_077379 | 1.1415890616080129  |
| NP_077380 | 1.2822174936360533  |
| NP_077381 | 1.271368822168087   |
| NP_077809 | -1                  |
| NP_077810 | 0.341615207400991   |
| NP_077811 | -1                  |
| NP_077812 | 0.9783877340919362  |
| NP_077813 | 0.803428144465718   |
| NP_077814 | 0.7926092783932148  |
| NP_077815 | 0.8439244751787481  |
| NP_085073 | -1                  |
| NP_085074 | 0.9850995146110204  |
| NP_085075 | 0.6617362099262631  |
| NP_085914 | -1                  |
| NP_110453 | 0.9473468544656861  |
| NP_110454 | 1.259023360276875   |
| NP_110455 | 1.7268730910202337  |
| NP_110456 | 1.4168428656039669  |
| NP_110457 | 0.8392829129641145  |
| NP_110458 | -1                  |
| NP_110459 | -1                  |
| NP_110460 | 0.645794220955547   |
| NP_110461 | 0.2005933842487515  |
| NP_110462 | 1.000273435898752   |
| NP_110463 | 0.9870906016288531  |
| NP_110465 | -1                  |
| NP_110466 | -1                  |
| NP_110467 | -1                  |
| NP_110468 | 0.45956285467308416 |
| NP_110471 | 1.1214740764650686  |
| NP_110472 | 1.0851804442201047  |
| NP_110473 | 1.2315294123199632  |
| NP_110474 | 1.3573157903783308  |

|           |                      |
|-----------|----------------------|
| NP_110475 | 0.015917882616225305 |
| NP_110476 | 0.9998366582250279   |
| NP_110477 | -1                   |
| NP_110478 | 1.1506629721375516   |
| NP_110479 | 1.3168434700487477   |
| NP_110480 | 1.0588908066369642   |
| NP_110481 | 1.193040048251387    |
| NP_110482 | 1.3452062865986154   |
| NP_110483 | 8.266512529824345    |
| NP_110484 | 1.0323237373398992   |
| NP_110485 | 2.2543173147668405   |
| NP_110486 | -1                   |
| NP_110487 | 0.9284061256451696   |
| NP_110488 | 0.7142865035236098   |
| NP_110489 | 1.1890249715372672   |
| NP_110490 | 1.4676542756581903   |
| NP_110491 | -1                   |
| NP_110492 | 0.6112219027027039   |
| NP_110494 | 1.0680743197195228   |
| NP_110495 | 1.1110779465501837   |
| NP_110496 | 1.229231720384767    |
| NP_110497 | 0.7882980127001051   |
| NP_110498 | -1                   |
| NP_110499 | 0.8895681448500895   |
| NP_110500 | 1.00361594053621     |
| NP_110502 | -1                   |
| NP_112247 | 0.9747039682797403   |
| NP_112248 | 0.6664629994813539   |
| NP_112249 | 0.9384326728184746   |
| NP_112250 | 0.9920362974179323   |
| NP_112251 | 1.0791089935206435   |
| NP_112252 | -1                   |
| NP_112253 | -1                   |
| NP_112254 | 0.68482278207515     |
| NP_112255 | -1                   |
| NP_112256 | 1.6162403294526084   |
| NP_112257 | 1.1816485864151807   |
| NP_112258 | 0.6340834817607313   |
| NP_112259 | 1.0944627729691538   |
| NP_112260 | -1                   |
| NP_112261 | -1                   |
| NP_112262 | 0.9680341669259797   |
| NP_112263 | -1                   |
| NP_112264 | 0.7452726950551651   |
| NP_112265 | -1                   |
| NP_112268 | 0.8850554793328911   |
| NP_112269 | 1.0691119545086447   |
| NP_112270 | 0.9976437303662641   |
| NP_112271 | 1.074366402743421    |
| NP_112272 | -1                   |
| NP_112273 | 1.2883537197046329   |
| NP_112274 | 0.20351067265750541  |
| NP_112275 | 1.0170027935424615   |
| NP_112276 | 1.0586865470953806   |
| NP_112277 | -1                   |
| NP_112278 | 1.338153902153082    |
| NP_112279 | 1.1451912775361537   |
| NP_112280 | 2.022740344729137    |
| NP_112281 | -1                   |
| NP_112282 | 1.1429207726846093   |
| NP_112283 | 1.0375325754585683   |
| NP_112284 | 39.694844608366196   |

|           |                    |
|-----------|--------------------|
| NP.112285 | 0.7908601424434796 |
| NP.112286 | 1.0077545654444604 |
| NP.112288 | 1.4795970158403229 |
| NP.112289 | 1.0280847112773228 |
| NP.112290 | 1.2632007696141665 |
| NP.112291 | 1.127765854889024  |
| NP.112292 | 1.1529109211615716 |
| NP.112293 | 1.165608876187377  |
| NP.112294 | 0.908616512657383  |
| NP.112295 | 0.9455866162840061 |
| NP.112296 | 1.3299217640397405 |
| NP.112297 | 1.1714953714903273 |
| NP.112298 | 1.3325857809291317 |
| NP.112299 | 1.3860641978318258 |
| NP.112300 | -1                 |
| NP.112301 | -1                 |
| NP.112302 | 1.2392517480814342 |
| NP.112303 | 0.9362912651889702 |
| NP.112304 | 0.9061199481177625 |
| NP.112305 | 1.0248117957573386 |
| NP.112306 | 1.143698368673886  |
| NP.112307 | 1.2191394135253746 |
| NP.112308 | 0.9593684863033853 |
| NP.112309 | -1                 |
| NP.112310 | 0.9510167899227957 |
| NP.112312 | 0.9758094909359293 |
| NP.112313 | 1.043481124070742  |
| NP.112314 | 1.2441939955900494 |
| NP.112315 | 1.0501635775712908 |
| NP.112316 | 0.6118091235649543 |
| NP.112317 | 6.200930666092654  |
| NP.112318 | 0.5700800087821062 |
| NP.112319 | 1.1937952070376983 |
| NP.112320 | 1.2504455556213891 |
| NP.112321 | 0.7329116895133577 |
| NP.112323 | 1.3512315980260432 |
| NP.112324 | 0.8036417807155875 |
| NP.112325 | 0.9709949957308108 |
| NP.112326 | 0.8662153756291321 |
| NP.112327 | 1.0811672137320847 |
| NP.112328 | 0.4150506115475073 |
| NP.112331 | -1                 |
| NP.112332 | -1                 |
| NP.112335 | -1                 |
| NP.112336 | 1.4597390654201954 |
| NP.112337 | 0.9856307688738165 |
| NP.112339 | 0.9062113285731772 |
| NP.112340 | 1.2044922883882274 |
| NP.112341 | 0.9385606218009853 |
| NP.112343 | 1.149068606838407  |
| NP.112344 | 1.0980683117088295 |
| NP.112345 | 1.0695689166273246 |
| NP.112347 | 1.0254140242425107 |
| NP.112349 | -1                 |
| NP.112350 | -1                 |
| NP.112351 | 2.030005614704884  |
| NP.112352 | 1.0391575715929633 |
| NP.112353 | -1                 |
| NP.112354 | 0.509706726921444  |
| NP.112355 | 1.2441923165837236 |
| NP.112356 | 1.0154490846301907 |
| NP.112357 | 0.8987424397829984 |



|           |                    |
|-----------|--------------------|
| NP.112358 | -1                 |
| NP.112359 | 0.7153242445172764 |
| NP.112360 | 1.326034255950174  |
| NP.112361 | 1.138385046755997  |
| NP.112362 | 1.0995976580222204 |
| NP.112363 | 1.0181917834692789 |
| NP.112364 | 1.0075593198200055 |
| NP.112365 | 1.0974790347882721 |
| NP.112366 | 0.9627492464003403 |
| NP.112367 | 0.9181259923090713 |
| NP.112368 | 1.0268627803934982 |
| NP.112369 | 1.2424375652297455 |
| NP.112370 | 1.0618233081427204 |
| NP.112371 | 1.1458174485148886 |
| NP.112372 | 1.1397331104729773 |
| NP.112373 | 1.124950625201721  |
| NP.112374 | 0.808071057431207  |
| NP.112376 | 1.2991615193533688 |
| NP.112377 | 1.1569665459397032 |
| NP.112378 | 1.3685060720270872 |
| NP.112379 | 1.071641532718541  |
| NP.112380 | 15.197056039670494 |
| NP.112381 | 0.9796320546726197 |
| NP.112382 | 1.450711332576227  |
| NP.112383 | 0.990495245732027  |
| NP.112384 | 1.121457470800084  |
| NP.112385 | -1                 |
| NP.112386 | -1                 |
| NP.112387 | 1.2030306070630952 |
| NP.112388 | 1.0846462606341096 |
| NP.112389 | -1                 |
| NP.112391 | 0.6640006192755146 |
| NP.112392 | 1.3324269564818854 |
| NP.112393 | 0.9119122139280273 |
| NP.112394 | 1.2190380723014405 |
| NP.112395 | 1.0965434543440014 |
| NP.112396 | 0.9934485349238671 |
| NP.112397 | 1.048057921657707  |
| NP.112398 | 1.2212025967413058 |
| NP.112399 | 1.1420892791478472 |
| NP.112400 | 1.174388728085244  |
| NP.112401 | 1.232671854501472  |
| NP.112402 | 1.2484453417561514 |
| NP.112403 | 1.3179498053537662 |
| NP.112404 | 1.1789173947100628 |
| NP.112405 | 0.6062341308509148 |
| NP.112406 | 1.2225289779786281 |
| NP.112407 | 1.5982498949815487 |
| NP.112408 | 0.902070631178117  |
| NP.112409 | 1.2525912641579737 |
| NP.112410 | 1.655938051725632  |
| NP.112411 | 0.8588999617535721 |
| NP.112412 | -1                 |
| NP.112413 | 0.8171404597846976 |
| NP.112414 | 0.7354954703170761 |
| NP.112415 | 0.9498173526361654 |
| NP.112416 | 0.8073126339937486 |
| NP.112514 | 1.300557548518612  |
| NP.112515 | 1.4440497017189324 |
| NP.112516 | 1.1401483103832524 |
| NP.112517 | -1                 |
| NP.112518 | 0.7980179450318875 |

|           |                      |
|-----------|----------------------|
| NP.112520 | -1                   |
| NP.112521 | -1                   |
| NP.112605 | -1                   |
| NP.112606 | 0.9453582687902382   |
| NP.112607 | 1.097369406444234    |
| NP.112608 | 1.1719874031693143   |
| NP.112610 | 1.015540556530986    |
| NP.112611 | 0.8538902726507974   |
| NP.112612 | 1.0179129067441213   |
| NP.112614 | 1.000650668525555    |
| NP.112615 | 0.9896417373899417   |
| NP.112616 | 1.0350626503655196   |
| NP.112617 | 0.7323414146871542   |
| NP.112618 | 1.3295575585781885   |
| NP.112619 | -1                   |
| NP.112620 | 0.9864869872818596   |
| NP.112621 | 0.9724379846903166   |
| NP.112622 | -1                   |
| NP.112624 | -1                   |
| NP.112625 | 0.7191152041686145   |
| NP.112626 | -1                   |
| NP.112627 | 0.9222525760424832   |
| NP.112628 | 1.015900323021457    |
| NP.112629 | 1.0300330375505249   |
| NP.112630 | 1.2276224694006734   |
| NP.112631 | 1.629554093379805    |
| NP.112632 | 0.9193413036170758   |
| NP.112633 | -1                   |
| NP.112634 | 2.141018451390157    |
| NP.112635 | 0.9369955970987125   |
| NP.112636 | 1.0414467501798714   |
| NP.112637 | 1.1433749776352797   |
| NP.112638 | 1.2117313291890115   |
| NP.112639 | -1                   |
| NP.112640 | 0.8853870984852008   |
| NP.112641 | 1.1566271989658947   |
| NP.112642 | 1.005624008021255    |
| NP.112643 | 0.9167546298281446   |
| NP.112644 | 1.0772639685230583   |
| NP.112645 | 1.5775153423621682   |
| NP.112646 | 0.9044905116736369   |
| NP.112647 | 1.1397900914698393   |
| NP.112648 | 1.2086643537911232   |
| NP.112649 | 0.823925020137464    |
| NP.112650 | 1.136398950212415    |
| NP.113690 | -1                   |
| NP.113691 | -1                   |
| NP.113692 | 0.8812529004218402   |
| NP.113695 | 1.0209343787292948   |
| NP.113697 | 0.8942736345664636   |
| NP.113698 | 0.9750941165236475   |
| NP.113699 | 0.7672584185185968   |
| NP.113700 | 1.9034938247012405   |
| NP.113701 | -1                   |
| NP.113702 | 0.9361961407828544   |
| NP.113703 | 1.4275001736772985   |
| NP.113705 | 1.2986344511746977   |
| NP.113706 | 0.6880048915452228   |
| NP.113708 | 0.026781469140044773 |
| NP.113709 | 1.6688041245771406   |
| NP.113710 | 1.2997300332825965   |
| NP.113711 | -1                   |

|           |                     |
|-----------|---------------------|
| NP_113715 | 0.8866261255703963  |
| NP_113716 | 0.7387727368627223  |
| NP_113718 | 1.4159660408294465  |
| NP_113719 | 0.9982130474115442  |
| NP_113721 | -1                  |
| NP_113722 | -1                  |
| NP_113723 | 1.0837911962204236  |
| NP_113724 | 1.0658441322915593  |
| NP_113725 | 1.4726168043696142  |
| NP_113726 | 1.2565469003771044  |
| NP_113727 | -1                  |
| NP_113729 | 0.6931058300249439  |
| NP_113730 | 1.343903670379257   |
| NP_113731 | 1.0795742454868391  |
| NP_113732 | 7.0607428650023385  |
| NP_113733 | 2.064008426292349   |
| NP_113734 | -1                  |
| NP_113736 | 0.8767308988626202  |
| NP_113737 | 1.3404672152487962  |
| NP_113738 | -1                  |
| NP_113739 | 0.8390417683108894  |
| NP_113741 | 0.8133993007761869  |
| NP_113744 | 0.7203026871461008  |
| NP_113745 | -1                  |
| NP_113746 | 4.860703728648509   |
| NP_113747 | 1.6463925986072376  |
| NP_113748 | 0.5174617294072409  |
| NP_113749 | 1.2793254072133111  |
| NP_113750 | 1.1630068521479753  |
| NP_113751 | 1.0152846251398293  |
| NP_113752 | -1                  |
| NP_113753 | -1                  |
| NP_113756 | 1.195154685261105   |
| NP_113757 | 1.0674669896866753  |
| NP_113760 | -1                  |
| NP_113761 | 1.0355029753290284  |
| NP_113763 | 1.24021500150896    |
| NP_113764 | 0.9853878153923485  |
| NP_113765 | -1                  |
| NP_113766 | 1.0227471014696896  |
| NP_113767 | 0.740884696314864   |
| NP_113769 | 1.630092424437564   |
| NP_113771 | 1.1942620097412002  |
| NP_113772 | -1                  |
| NP_113773 | -1                  |
| NP_113774 | 1.2188658174146614  |
| NP_113775 | 1.2207560525123349  |
| NP_113776 | 1.2359611976034874  |
| NP_113777 | 1.046502890361262   |
| NP_113778 | 0.39820544985782497 |
| NP_113781 | 0.788233395743872   |
| NP_113782 | 0.7555751429961867  |
| NP_113783 | 0.8504028369650501  |
| NP_113784 | 1.1378550936832161  |
| NP_113785 | 1.147594199187851   |
| NP_113786 | 187.20324426285126  |
| NP_113787 | 0.9760586246505981  |
| NP_113788 | 1.0701638935219784  |
| NP_113789 | 1.0968175616120108  |
| NP_113790 | -1                  |
| NP_113791 | 1.097184618362965   |
| NP_113792 | 1.3407704396465545  |

|           |                    |
|-----------|--------------------|
| NP_113793 | 1.275259940780652  |
| NP_113794 | 0.754637240855453  |
| NP_113796 | -1                 |
| NP_113797 | 1.977312297652107  |
| NP_113798 | 1.2572920898363757 |
| NP_113800 | 1.2882993541009966 |
| NP_113801 | -1                 |
| NP_113802 | 1.4456901830467737 |
| NP_113803 | 0.993468918783763  |
| NP_113804 | 0.9538867261427821 |
| NP_113805 | 1.1868274362100557 |
| NP_113807 | -1                 |
| NP_113808 | -1                 |
| NP_113809 | 0.8575943091273084 |
| NP_113810 | 1.9026137650367694 |
| NP_113811 | 1.3821402357409147 |
| NP_113812 | 0.5097852470463279 |
| NP_113814 | 1.4302619464493984 |
| NP_113815 | 1.15806718812781   |
| NP_113816 | 0.6583254011860012 |
| NP_113817 | 0.7844406053327336 |
| NP_113818 | -1                 |
| NP_113819 | 1.091762865716681  |
| NP_113820 | 0.9502886815867253 |
| NP_113821 | 1.3623139993942688 |
| NP_113822 | -1                 |
| NP_113823 | 1.0469149007496608 |
| NP_113827 | 1.0637616411248627 |
| NP_113828 | 1.028369419197822  |
| NP_113829 | -1                 |
| NP_113830 | 1.4053051905457252 |
| NP_113831 | 1.0831623733285143 |
| NP_113832 | 0.9352202140295313 |
| NP_113833 | 1.0847497815766014 |
| NP_113834 | 1.323583601325223  |
| NP_113835 | 0.6238013824171579 |
| NP_113836 | 4.0430284884685666 |
| NP_113837 | -1                 |
| NP_113838 | 0.996644321228472  |
| NP_113839 | -1                 |
| NP_113840 | -1                 |
| NP_113841 | 0.8114676502080149 |
| NP_113842 | 1.0794671532465276 |
| NP_113843 | 0.7369753161954598 |
| NP_113844 | 1.0623437595863188 |
| NP_113845 | 1.6773958607272226 |
| NP_113846 | 1.3244978950104984 |
| NP_113847 | 0.8828671631397856 |
| NP_113848 | 0.7703386717136911 |
| NP_113850 | 1.0955622378477983 |
| NP_113851 | -1                 |
| NP_113852 | 2.816837233240966  |
| NP_113853 | 0.9550786978463236 |
| NP_113854 | -1                 |
| NP_113855 | 1.1903083835727408 |
| NP_113856 | 0.8572547401830284 |
| NP_113857 | -1                 |
| NP_113858 | -1                 |
| NP_113860 | -1                 |
| NP_113861 | 1.1450853902959999 |
| NP_113862 | 1.0778510138160333 |
| NP_113863 | 1.5112121839831203 |

|           |                    |
|-----------|--------------------|
| NP_113864 | 1.3051455399408447 |
| NP_113865 | 1.1706314768143469 |
| NP_113866 | 1.222743077164275  |
| NP_113868 | -1                 |
| NP_113870 | 0.5993771289689552 |
| NP_113871 | 1.0921734021896106 |
| NP_113872 | 1.6406441766331847 |
| NP_113873 | 0.7410167573928779 |
| NP_113874 | 0.9387359852873512 |
| NP_113875 | 0.8537021146749233 |
| NP_113876 | 1.5675994420426071 |
| NP_113877 | -1                 |
| NP_113878 | 1.5736137761684097 |
| NP_113879 | -1                 |
| NP_113880 | 1.0876400113453952 |
| NP_113881 | -1                 |
| NP_113882 | 1.0988245509940076 |
| NP_113883 | 1.3090985031154527 |
| NP_113884 | 1.1318715021146601 |
| NP_113885 | 1.0351374603283445 |
| NP_113886 | 1.0613906248799099 |
| NP_113887 | 1.1726880557198716 |
| NP_113888 | 1.1162893863980992 |
| NP_113891 | 0.9635073235867881 |
| NP_113892 | 1.014798798747134  |
| NP_113893 | 0.7480901074526356 |
| NP_113894 | 1.0990059245518025 |
| NP_113895 | 0.9122103754008961 |
| NP_113896 | 1.3191243092637663 |
| NP_113897 | 0.8754485653582843 |
| NP_113898 | -1                 |
| NP_113899 | 1.0825565190704176 |
| NP_113900 | -1                 |
| NP_113901 | 1.5021066113137866 |
| NP_113902 | 1.0359333128993704 |
| NP_113903 | 0.4113527535207819 |
| NP_113904 | 0.2939592991340459 |
| NP_113906 | 0.9558418818690998 |
| NP_113907 | 1.1177216586417893 |
| NP_113908 | 1.1299176388385634 |
| NP_113909 | 1.3248846384250765 |
| NP_113910 | 1.0542575862178527 |
| NP_113911 | 1.056999292370669  |
| NP_113913 | 0.7889674627772489 |
| NP_113914 | -1                 |
| NP_113915 | 0.9978389349571937 |
| NP_113916 | -1                 |
| NP_113917 | 0.9891089290544275 |
| NP_113918 | -1                 |
| NP_113919 | 1.222756620054802  |
| NP_113920 | -1                 |
| NP_113921 | -1                 |
| NP_113923 | 0.9873477978501312 |
| NP_113924 | 1.0933930907037799 |
| NP_113925 | -1                 |
| NP_113926 | 0.9918837769066017 |
| NP_113927 | -1                 |
| NP_113928 | 1.1049768767252417 |
| NP_113929 | 0.8115844210678432 |
| NP_113930 | 1.2353187202685085 |
| NP_113931 | 1.2508518089202496 |
| NP_113932 | -1                 |

|           |                     |
|-----------|---------------------|
| NP_113933 | 1.3790038722200038  |
| NP_113934 | 1.71290399879329    |
| NP_113935 | -1                  |
| NP_113937 | 1.0477894127983947  |
| NP_113938 | -1                  |
| NP_113939 | 1.1008958734511325  |
| NP_113940 | 1.0079975043772862  |
| NP_113941 | 2.532406461695014   |
| NP_113943 | 1.7632313442364513  |
| NP_113944 | 0.989467355038616   |
| NP_113945 | 1.124856565859668   |
| NP_113946 | -1                  |
| NP_113947 | -1                  |
| NP_113948 | 0.96794225165107    |
| NP_113949 | 0.49574385282031547 |
| NP_113950 | 1.1163049710085453  |
| NP_113951 | 0.8899307518635647  |
| NP_113954 | -1                  |
| NP_113956 | 1.220587665421708   |
| NP_113957 | 0.7673180599044911  |
| NP_113958 | 1.561826023259998   |
| NP_113959 | 1.234675220126119   |
| NP_113960 | 0.9823702632160325  |
| NP_113961 | 0.874359064558464   |
| NP_113962 | 1.01712438668312    |
| NP_113963 | 2.0508617058264487  |
| NP_113964 | 1.2428703921809323  |
| NP_113965 | 0.8161493603157287  |
| NP_113966 | 1.0513463573163297  |
| NP_113967 | 1.5111630740275652  |
| NP_113968 | -1                  |
| NP_113969 | 0.8591085247650532  |
| NP_113970 | 0.9847487256415807  |
| NP_113971 | 1.1511919167053872  |
| NP_113972 | 0.8996063399431561  |
| NP_113973 | 0.8493049485716054  |
| NP_113974 | 1.1179553486134912  |
| NP_113975 | 1.3390552688944837  |
| NP_113976 | 2.454545815853058   |
| NP_113977 | 1.3014342696614607  |
| NP_113978 | 1.0173845379448572  |
| NP_113980 | 1.0594359482788838  |
| NP_113981 | 1.4573338286845718  |
| NP_113983 | 0.9054007214499272  |
| NP_113984 | -1                  |
| NP_113985 | 1.7424942904347411  |
| NP_113986 | 1.0166711559968222  |
| NP_113987 | -1                  |
| NP_113988 | 0.8380100022127782  |
| NP_113989 | 1.167986281089966   |
| NP_113990 | 5.635057298655865   |
| NP_113991 | 1.0898800477414896  |
| NP_113994 | -1                  |
| NP_113995 | 0.6069687655548555  |
| NP_113996 | 0.02003155002313344 |
| NP_113997 | 1.1491163594655986  |
| NP_113998 | -1                  |
| NP_113999 | 1.9462312613992243  |
| NP_114000 | 1.18838091539782    |
| NP_114001 | -1                  |
| NP_114002 | 1.1855802152388761  |
| NP_114003 | 1.3626147213938788  |

|           |                    |
|-----------|--------------------|
| NP_114004 | 0.9709896712667996 |
| NP_114005 | 0.6905288127895144 |
| NP_114006 | 1.4274381084122976 |
| NP_114007 | 1.4150597758640624 |
| NP_114008 | 1.3553589598940985 |
| NP_114009 | 0.1523332565003053 |
| NP_114010 | -1                 |
| NP_114011 | 1.2323070511524232 |
| NP_114012 | 1.2818892233477808 |
| NP_114013 | 0.9801372740983525 |
| NP_114014 | 1.0162339200518287 |
| NP_114015 | 0.6746222168025898 |
| NP_114016 | -1                 |
| NP_114018 | 1.0985575239539669 |
| NP_114019 | 1.435861029765311  |
| NP_114020 | 1.1011895691511266 |
| NP_114021 | 0.8536465945337275 |
| NP_114022 | 0.4469216357779799 |
| NP_114023 | -1                 |
| NP_114024 | 1.569261604384448  |
| NP_114026 | 1.1295437027927318 |
| NP_114027 | 0.858226252491634  |
| NP_114028 | 0.9569687732907927 |
| NP_114029 | 1.1065612567552123 |
| NP_114039 | 0.8846708641162946 |
| NP_114061 | 1.321501772645555  |
| NP_114173 | 0.5024867920456658 |
| NP_114176 | 1.8451369825857027 |
| NP_114178 | 1.6930290889444872 |
| NP_114179 | 0.8839002960892177 |
| NP_114180 | 1.0180789171398132 |
| NP_114181 | 1.010773027879629  |
| NP_114182 | 0.8658494945010536 |
| NP_114183 | -1                 |
| NP_114184 | 1.0439920359970094 |
| NP_114185 | 1.1723738739878795 |
| NP_114186 | 1.614723432415676  |
| NP_114187 | 1.129584885969357  |
| NP_114188 | -1                 |
| NP_114189 | 0.8651281357488089 |
| NP_114190 | -1                 |
| NP_114191 | 1.0444762286113642 |
| NP_114192 | 1.125143599464212  |
| NP_114193 | 1.1408013134017507 |
| NP_114444 | 1.7603371265351209 |
| NP_114445 | 1.5432577143870232 |
| NP_114446 | 0.9149031792753077 |
| NP_114447 | 0.9978613826162722 |
| NP_114449 | 1.619492292064725  |
| NP_114450 | -1                 |
| NP_114451 | 1.0845461065354556 |
| NP_114452 | 0.9296975917945128 |
| NP_114454 | -1                 |
| NP_114455 | 0.9307986427848696 |
| NP_114456 | 1.5867857853013616 |
| NP_114458 | 1.7990810207934018 |
| NP_114459 | 2.455340195473998  |
| NP_114460 | 1.5666126492980357 |
| NP_114461 | 1.2514611907510917 |
| NP_114462 | -1                 |
| NP_114463 | 1.3084653392381633 |
| NP_114464 | 1.0472091054369284 |

|           |                     |
|-----------|---------------------|
| NP.114465 | -1                  |
| NP.114466 | -1                  |
| NP.114468 | 1.0222041556222732  |
| NP.114469 | 0.9639475856511055  |
| NP.114470 | -1                  |
| NP.114471 | 1.4689976318005646  |
| NP.114472 | 0.7183578570907695  |
| NP.114473 | -1                  |
| NP.114474 | 0.28830781345885087 |
| NP.115792 | 1.008869231367531   |
| NP.115851 | -1                  |
| NP.116001 | 0.9638036231889218  |
| NP.116002 | 0.7516186061115344  |
| NP.116003 | 0.9480640021100748  |
| NP.116004 | 1.2486442436862732  |
| NP.116005 | 1.1011156277680718  |
| NP.116006 | 1.1820930305350388  |
| NP.116785 | -1                  |
| NP.148981 | 0.9636050570130922  |
| NP.149086 | -1                  |
| NP.149087 | 1.2641146432741992  |
| NP.149088 | 1.3681750284942025  |
| NP.149089 | 0.8915095327524752  |
| NP.149090 | 0.7238741516518911  |
| NP.150233 | 0.9876740836956486  |
| NP.150236 | 1.0041564380951418  |
| NP.150237 | 1.079249995079325   |
| NP.150238 | 1.021053002789482   |
| NP.150239 | 0.937180316957734   |
| NP.150240 | -1                  |
| NP.150641 | 1.868415128871531   |
| NP.203500 | 1.172775963278209   |
| NP.203502 | 0.9596157558004074  |
| NP.203503 | 1.086826511040905   |
| NP.203523 | -1                  |
| NP.203694 | 0.7756649764512402  |
| NP.254276 | 1.0842517081067804  |
| NP.254277 | 1.1506347503540324  |
| NP.277020 | 1.0970376143099896  |
| NP.277034 | 1.0449265904446967  |
| NP.284925 | 1.1318926212755238  |
| NP.414541 | 1.456267778954658   |
| NP.434685 | 1.0020792392462512  |
| NP.434686 | 1.1821575010975438  |
| NP.434688 | 0.8054747975207045  |
| NP.434689 | -1                  |
| NP.434690 | -1                  |
| NP.434692 | -1                  |
| NP.434693 | -1                  |
| NP.434694 | 1.5241909504747608  |
| NP.434695 | 1.0440303007199903  |
| NP.434696 | 1.1645717068311197  |
| NP.439894 | 6.623323790918965   |
| NP.443211 | 1.0092138714191856  |
| NP.443212 | -1                  |
| NP.443213 | 0.9988264316508988  |
| NP.443215 | 1.1745089547434833  |
| NP.444178 | -1                  |
| NP.444180 | 0.2918608879401945  |
| NP.445740 | -1                  |
| NP.445741 | -1                  |
| NP.445743 | 1.0513759723655847  |



|           |                    |
|-----------|--------------------|
| NP_445745 | -1                 |
| NP_445746 | -1                 |
| NP_445747 | 1.686071361474359  |
| NP_445748 | -1                 |
| NP_445749 | 0.9790022813288367 |
| NP_445751 | -1                 |
| NP_445753 | 0.7982527985293464 |
| NP_445754 | -1                 |
| NP_445755 | -1                 |
| NP_445758 | 1.1474153085272305 |
| NP_445759 | 1.0140618530634649 |
| NP_445761 | 1.0188280612775769 |
| NP_445762 | 0.68475974905759   |
| NP_445763 | 1.2864157229066933 |
| NP_445765 | 1.1689692968934042 |
| NP_445766 | 1.8217752167178503 |
| NP_445768 | 0.9634276781220755 |
| NP_445769 | -1                 |
| NP_445770 | -1                 |
| NP_445771 | 1.2013960656108484 |
| NP_445773 | 3.579680515147286  |
| NP_445774 | 0.9501339463912406 |
| NP_445775 | 1.3007609997084202 |
| NP_445776 | 1.1807230903397519 |
| NP_445777 | -1                 |
| NP_445778 | 1.7745936505470028 |
| NP_445779 | -1                 |
| NP_445780 | 1.6096960647477287 |
| NP_445781 | -1                 |
| NP_445783 | 0.8536562065145366 |
| NP_445784 | 0.6936386168016466 |
| NP_445785 | -1                 |
| NP_445786 | 1.0116321903448446 |
| NP_445787 | 1.4286317100382318 |
| NP_445788 | -1                 |
| NP_445789 | 0.9830543276864963 |
| NP_445790 | -1                 |
| NP_445791 | 0.9465915347329161 |
| NP_445792 | 1.025578164500632  |
| NP_445793 | 0.6687006079070849 |
| NP_445794 | -1                 |
| NP_445795 | 0.8527609443460351 |
| NP_445796 | -1                 |
| NP_445797 | 0.8353890686085231 |
| NP_445798 | 2.781598211548266  |
| NP_445799 | 0.9796948290970088 |
| NP_445800 | -1                 |
| NP_445801 | 0.9254875457213796 |
| NP_445802 | 0.7245630327815564 |
| NP_445803 | 1.9129009893795257 |
| NP_445804 | 2.6269460670423386 |
| NP_445805 | -1                 |
| NP_445806 | 1.1193294119330859 |
| NP_445807 | 1.7146726194957014 |
| NP_445808 | 0.8191975498690206 |
| NP_445809 | 1.100740105946928  |
| NP_445810 | 0.6442545735048486 |
| NP_445811 | 0.779773484890533  |
| NP_445812 | 1.5383637514942343 |
| NP_445814 | 1.0563863269069873 |
| NP_445816 | -1                 |
| NP_445817 | 0.2109741508107057 |

|           |                     |
|-----------|---------------------|
| NP_445821 | 0.8874233524822808  |
| NP_445822 | 0.6952883103658255  |
| NP_445823 | 0.8076191956629896  |
| NP_445824 | 0.9045250626977879  |
| NP_445825 | 0.5034859361755427  |
| NP_445826 | 0.896085723330537   |
| NP_445827 | 1.0848908941864128  |
| NP_445831 | -1                  |
| NP_445832 | 1.0715309924103158  |
| NP_445833 | -1                  |
| NP_445835 | 1.0344805266743509  |
| NP_445837 | 3.0334652611286876  |
| NP_445840 | -1                  |
| NP_445841 | 1.0731960908300875  |
| NP_445842 | 1.4627558675528107  |
| NP_445843 | 2.585125440111266   |
| NP_445846 | 2.4834983841006752  |
| NP_445847 | -1                  |
| NP_445851 | -1                  |
| NP_445852 | 1.0408008567664064  |
| NP_445853 | 0.25618730949287943 |
| NP_445854 | -1                  |
| NP_445855 | 1.269478085818673   |
| NP_445856 | 1.0517693830033172  |
| NP_445857 | -1                  |
| NP_445858 | 1.241157905612445   |
| NP_445859 | 1.2543166634888676  |
| NP_445860 | -1                  |
| NP_445861 | 0.5303528305766382  |
| NP_445862 | 0.9514755621773755  |
| NP_445863 | 0.956677308755518   |
| NP_445864 | 1.129325894647019   |
| NP_445867 | 1.1031436088938102  |
| NP_445868 | -1                  |
| NP_445869 | -1                  |
| NP_445870 | 1.0882371656691552  |
| NP_445872 | 1.035697116823637   |
| NP_445873 | 0.6874982718133584  |
| NP_445875 | -1                  |
| NP_445876 | -1                  |
| NP_445877 | 0.8612383424434427  |
| NP_445879 | 0.755450924511074   |
| NP_445880 | 1.5040970847287465  |
| NP_445881 | -1                  |
| NP_445882 | 1.2204292089231383  |
| NP_445883 | -1                  |
| NP_445885 | 0.8609058650726208  |
| NP_445887 | 1.0047732657407031  |
| NP_445888 | 1.1685706312325843  |
| NP_445889 | 0.7610114395912763  |
| NP_445890 | 1.1708398318298154  |
| NP_445891 | 1.012592010286918   |
| NP_445892 | 1.1225124750130795  |
| NP_445893 | -1                  |
| NP_445897 | 1.9755820545150222  |
| NP_445900 | 0.7411504827755788  |
| NP_445905 | 1.1919637888374788  |
| NP_445907 | 1.1653466327680764  |
| NP_445908 | 0.32117905720692136 |
| NP_445909 | -1                  |
| NP_445910 | 0.7552425284910234  |
| NP_445911 | 0.9302030999834313  |

|           |                    |
|-----------|--------------------|
| NP_445912 | -1                 |
| NP_445914 | 1.2151039693994152 |
| NP_445915 | 1.0289932687771832 |
| NP_445916 | 0.6967403839580094 |
| NP_445917 | -1                 |
| NP_445919 | 0.9706816791593299 |
| NP_445921 | 1.1917613586294482 |
| NP_445923 | 0.9037694801881124 |
| NP_445924 | 0.8670521736484811 |
| NP_445925 | -1                 |
| NP_445926 | 1.061242235690795  |
| NP_445927 | 1.1074359744016604 |
| NP_445928 | 1.0291879250606146 |
| NP_445929 | 1.093207398069001  |
| NP_445930 | -1                 |
| NP_445932 | 1.5659903318623547 |
| NP_445933 | 1.6502358465584601 |
| NP_445934 | 2.8580396381280004 |
| NP_445935 | 1.1503963914614141 |
| NP_445936 | 1.27925948722335   |
| NP_445937 | 1.1560805286987457 |
| NP_445938 | 1.6372294445979865 |
| NP_445939 | 1.3267967642766625 |
| NP_445942 | 1.4423636304689154 |
| NP_445943 | -1                 |
| NP_445944 | 0.9802744307477249 |
| NP_445945 | 0.8438464240803785 |
| NP_445946 | 0.7133021903070059 |
| NP_445947 | -1                 |
| NP_445948 | -1                 |
| NP_445949 | -1                 |
| NP_445950 | -1                 |
| NP_445951 | 1.1497126193609228 |
| NP_445952 | 1.1601169658388932 |
| NP_445954 | 3.530567650454394  |
| NP_445955 | 0.7839250159959527 |
| NP_445958 | 1.5702497155157051 |
| NP_445959 | 0.5746030892136751 |
| NP_445960 | -1                 |
| NP_445961 | 0.9576960923436622 |
| NP_445963 | -1                 |
| NP_445964 | 1.048465855528952  |
| NP_445966 | -1                 |
| NP_445970 | 1.842085464861226  |
| NP_445972 | 1.18134840115618   |
| NP_445973 | 1.244772606613467  |
| NP_445974 | 0.8052485112204006 |
| NP_445975 | 0.8348443914611893 |
| NP_445976 | 1.0913520480636172 |
| NP_445977 | 0.978315115933793  |
| NP_445978 | -1                 |
| NP_445979 | 1.1151181636031484 |
| NP_445980 | 1.0153503466454763 |
| NP_445981 | 1.1953579395443885 |
| NP_445982 | 2.4246620306207887 |
| NP_445983 | 1.3404537290065148 |
| NP_445984 | 0.7711034798470916 |
| NP_445986 | 0.9710690499520425 |
| NP_445987 | 1.0530202994795348 |
| NP_445988 | 0.7954078901762484 |
| NP_445989 | 1.4302561540923662 |
| NP_445990 | 1.3139926955684103 |

|           |                     |
|-----------|---------------------|
| NP_445991 | 1.1022920402245644  |
| NP_445992 | 1.406130740068824   |
| NP_445993 | 1.0006599192182273  |
| NP_445994 | 1.078017980043141   |
| NP_445995 | 1.0775577350674908  |
| NP_445996 | 2.4011420738576548  |
| NP_446000 | 0.8858492197999798  |
| NP_446002 | 1.5950776188426243  |
| NP_446003 | 1.1086025151646495  |
| NP_446004 | 1.0226337433408916  |
| NP_446005 | 0.9486764550144066  |
| NP_446006 | 1.3029457200102452  |
| NP_446007 | 2.01040849479329    |
| NP_446008 | 0.8591286189696856  |
| NP_446009 | 1.1608130662559526  |
| NP_446010 | 1.2467686693446587  |
| NP_446011 | 2.257235073848403   |
| NP_446013 | 1.1492229740229787  |
| NP_446014 | -1                  |
| NP_446015 | 1.399842737585244   |
| NP_446017 | 1.4407549836676616  |
| NP_446019 | 1.6958915799493868  |
| NP_446020 | 1.156289961810794   |
| NP_446021 | 0.9062969944316496  |
| NP_446023 | 0.5930750135203106  |
| NP_446024 | 0.3289930404592872  |
| NP_446025 | 1.426705111436458   |
| NP_446026 | 1.0495457480174706  |
| NP_446027 | 1.0673808687080597  |
| NP_446028 | 0.9107585624330921  |
| NP_446029 | -1                  |
| NP_446030 | 0.943956472147074   |
| NP_446032 | 1.0420910302711297  |
| NP_446033 | 0.9996376747679937  |
| NP_446034 | 0.7999057667831271  |
| NP_446035 | -1                  |
| NP_446036 | 1.1470810904726114  |
| NP_446037 | 0.887106306818444   |
| NP_446038 | 0.8291965592983801  |
| NP_446039 | 1.554008834485755   |
| NP_446040 | 0.850127324372203   |
| NP_446041 | 1.2454808020735881  |
| NP_446042 | 1.0381173696391424  |
| NP_446043 | 0.39020875977294134 |
| NP_446044 | 0.9369143637785728  |
| NP_446045 | 0.9958100387483931  |
| NP_446046 | 3.5176971144475737  |
| NP_446047 | 1.1860153211082134  |
| NP_446048 | 0.6579098812932399  |
| NP_446049 | 1.0467297754659262  |
| NP_446050 | 0.9468673471777824  |
| NP_446051 | 1.1703025502609765  |
| NP_446052 | 1.4161599795779505  |
| NP_446053 | 1.2972802469000997  |
| NP_446054 | 0.8299222613368104  |
| NP_446055 | -1                  |
| NP_446056 | 0.7334404197112002  |
| NP_446057 | 1.0035730673636964  |
| NP_446058 | 0.9619476395341788  |
| NP_446059 | 0.9865435515803421  |
| NP_446060 | 1.1939790434373774  |
| NP_446061 | 1.2998099765305     |

|           |                    |
|-----------|--------------------|
| NP_446062 | 1.7202042761836938 |
| NP_446063 | 0.6712772139565625 |
| NP_446064 | 2.07793742703282   |
| NP_446065 | 1.1875968646056931 |
| NP_446066 | -1                 |
| NP_446067 | 0.683328928131658  |
| NP_446068 | 0.8547706998784791 |
| NP_446069 | -1                 |
| NP_446070 | 1.2215268675212492 |
| NP_446071 | 1.9449363747631596 |
| NP_446072 | 1.3266408229132034 |
| NP_446073 | 0.9956589777429832 |
| NP_446074 | 1.3895313332141663 |
| NP_446075 | 1.248507896889525  |
| NP_446076 | -1                 |
| NP_446077 | 0.9474346080069569 |
| NP_446078 | -1                 |
| NP_446081 | -1                 |
| NP_446082 | 1.3591813334666245 |
| NP_446083 | 1.112390236099232  |
| NP_446085 | 1.6478143275414627 |
| NP_446086 | 1.579759297179069  |
| NP_446087 | 1.0824937909294894 |
| NP_446089 | 1.1868087765633022 |
| NP_446090 | 0.8784207222502936 |
| NP_446091 | 0.8579271718980949 |
| NP_446092 | -1                 |
| NP_446093 | 1.520028911783298  |
| NP_446094 | 1.5449709389445185 |
| NP_446095 | -1                 |
| NP_446096 | -1                 |
| NP_446097 | -1                 |
| NP_446098 | 1.174321737661115  |
| NP_446099 | 1.313630976507661  |
| NP_446100 | -1                 |
| NP_446101 | 1.2129256198419796 |
| NP_446102 | 1.0491964863611212 |
| NP_446103 | -1                 |
| NP_446104 | -1                 |
| NP_446105 | 0.7870590627226319 |
| NP_446106 | 0.6670083664059262 |
| NP_446107 | 1.2412558793904764 |
| NP_446108 | -1                 |
| NP_446109 | 1.1797240870136674 |
| NP_446114 | 1.49260490514955   |
| NP_446116 | 0.5033231701098416 |
| NP_446117 | 1.604623547185012  |
| NP_446118 | -1                 |
| NP_446119 | 0.3912824410000659 |
| NP_446121 | 0.8314954082166904 |
| NP_446122 | 1.0863708683008473 |
| NP_446123 | 1.4253473959421339 |
| NP_446126 | 2.170733607860614  |
| NP_446127 | 1.1259191226659995 |
| NP_446129 | 0.8678579376452235 |
| NP_446130 | -1                 |
| NP_446131 | -1                 |
| NP_446132 | -1                 |
| NP_446133 | 1.0606984428590092 |
| NP_446134 | 0.7970740959102679 |
| NP_446135 | 1.137960548240747  |
| NP_446136 | 0.8129448674317147 |

|           |                    |
|-----------|--------------------|
| NP_446137 | 1.1953137091485144 |
| NP_446138 | -1                 |
| NP_446139 | 0.9902139784304946 |
| NP_446140 | -1                 |
| NP_446141 | 1.0361832547722565 |
| NP_446142 | 1.0776632232978403 |
| NP_446150 | 0.8819683645587869 |
| NP_446151 | -1                 |
| NP_446152 | -1                 |
| NP_446153 | -1                 |
| NP_446155 | 0.654569751057837  |
| NP_446156 | 1.8895142763464887 |
| NP_446158 | -1                 |
| NP_446159 | 0.9493065390223725 |
| NP_446165 | 2.1779875960494026 |
| NP_446166 | 3.9563235058766093 |
| NP_446168 | -1                 |
| NP_446170 | 0.8351106178032989 |
| NP_446171 | 0.3514846715451471 |
| NP_446172 | 1.0194626883229305 |
| NP_446173 | -1                 |
| NP_446174 | 0.9713450027632352 |
| NP_446175 | 1.108172359330707  |
| NP_446176 | 0.9751189805331686 |
| NP_446178 | -1                 |
| NP_446179 | 0.695383101044332  |
| NP_446181 | 0.8878112529896616 |
| NP_446182 | 1.4600670365978985 |
| NP_446183 | 1.0189689033312375 |
| NP_446185 | 1.2267751046901714 |
| NP_446186 | 1.5807957326042663 |
| NP_446187 | 1.2912636776267792 |
| NP_446188 | 2.2816061340881117 |
| NP_446190 | 1.6090480672576437 |
| NP_446191 | 1.6398706632373319 |
| NP_446192 | 1.2526153347739017 |
| NP_446193 | 0.8975896783433095 |
| NP_446194 | 0.9421176571238116 |
| NP_446195 | 0.9073800302181146 |
| NP_446196 | -1                 |
| NP_446198 | -1                 |
| NP_446199 | 1.1569281374127562 |
| NP_446200 | 0.8890715127466192 |
| NP_446201 | 1.00482744638838   |
| NP_446202 | -1                 |
| NP_446203 | 0.8960368033089172 |
| NP_446204 | 0.8723317673012625 |
| NP_446205 | 1.1079078250359555 |
| NP_446206 | 1.227848371430549  |
| NP_446207 | 1.268678921239928  |
| NP_446208 | 0.8797472234519187 |
| NP_446210 | 1.329209833049295  |
| NP_446214 | 0.8214142751931034 |
| NP_446215 | 1.159381843968839  |
| NP_446216 | 1.4095952582948457 |
| NP_446217 | 0.9441442519253735 |
| NP_446220 | 0.8168212803821572 |
| NP_446221 | 1.4932327657064208 |
| NP_446222 | 2.4127070308767284 |
| NP_446223 | -1                 |
| NP_446224 | 0.6112171360230988 |
| NP_446226 | 1.1434250359864817 |

|           |                    |
|-----------|--------------------|
| NP_446229 | 0.6067266400071463 |
| NP_446230 | 1.064823933510332  |
| NP_446231 | 0.8993609395654711 |
| NP_446233 | -1                 |
| NP_446235 | 0.6243198188040301 |
| NP_446237 | 0.9852884593040424 |
| NP_446238 | 0.7682152427640832 |
| NP_446239 | 1.1078276835687084 |
| NP_446240 | -1                 |
| NP_446243 | -1                 |
| NP_446244 | 0.9872198295255371 |
| NP_446246 | 1.171110339097488  |
| NP_446247 | 1.048003943051987  |
| NP_446248 | 1.1482009063476997 |
| NP_446249 | 1.2221064777240913 |
| NP_446250 | 1.0449442397884396 |
| NP_446251 | 0.8502136032874438 |
| NP_446252 | 1.0890017970858141 |
| NP_446253 | 1.2852515495920112 |
| NP_446256 | -1                 |
| NP_446258 | -1                 |
| NP_446259 | 0.8664913763919898 |
| NP_446260 | -1                 |
| NP_446261 | -1                 |
| NP_446262 | 0.9839334489055447 |
| NP_446263 | 0.8246966623406901 |
| NP_446264 | 0.787607988274471  |
| NP_446266 | 1.1043090251655647 |
| NP_446268 | -1                 |
| NP_446269 | -1                 |
| NP_446270 | 1.3625091288565343 |
| NP_446271 | 0.9348933614258631 |
| NP_446272 | -1                 |
| NP_446273 | 0.7752431316424521 |
| NP_446274 | 1.5599273428011902 |
| NP_446276 | 1.3205629486130883 |
| NP_446277 | 0.7520591752385942 |
| NP_446278 | 0.7673538980415443 |
| NP_446279 | 0.5436825555041559 |
| NP_446280 | -1                 |
| NP_446282 | 1.3807770882640515 |
| NP_446283 | -1                 |
| NP_446284 | -1                 |
| NP_446286 | -1                 |
| NP_446287 | 0.9697503530252143 |
| NP_446288 | -1                 |
| NP_446289 | 0.8700811002455057 |
| NP_446290 | 1.2760193754215414 |
| NP_446292 | 4.535825196925836  |
| NP_446294 | 0.9304672140071752 |
| NP_446295 | 0.8994480447744055 |
| NP_446296 | -1                 |
| NP_446297 | -1                 |
| NP_446298 | 1.0384157600270865 |
| NP_446299 | 0.7225103750276519 |
| NP_446300 | 0.9503890959386587 |
| NP_446301 | 0.4455933030673403 |
| NP_446302 | 0.7797591596888588 |
| NP_446303 | 0.9881371209875502 |
| NP_446305 | 0.8705971314245828 |
| NP_446306 | 0.7535944425401174 |
| NP_446308 | -1                 |

|           |                    |
|-----------|--------------------|
| NP_446309 | 1.11401247221238   |
| NP_446310 | 1.7151410240254783 |
| NP_446311 | -1                 |
| NP_446314 | 0.9668474584222767 |
| NP_446315 | -1                 |
| NP_446316 | 1.1950656133282602 |
| NP_446317 | 0.7724906517541886 |
| NP_446318 | 0.9769242275252027 |
| NP_446319 | 1.0527643154141104 |
| NP_446320 | 1.084480871069625  |
| NP_446321 | 1.0705108727147121 |
| NP_446322 | 1.1215979923035764 |
| NP_446326 | -1                 |
| NP_446328 | 0.8268438848191817 |
| NP_446329 | 0.8511416626207245 |
| NP_446330 | 1.2764136176176355 |
| NP_446331 | -1                 |
| NP_446332 | 0.8373163553001927 |
| NP_446333 | 0.8604033332050066 |
| NP_446334 | 0.8272926680105203 |
| NP_446335 | 1.284093958085822  |
| NP_446336 | 1.042008271808911  |
| NP_446337 | 1.0583610820542675 |
| NP_446338 | 0.8390221813414963 |
| NP_446339 | 1.1915698199077438 |
| NP_446340 | 1.2487926454487825 |
| NP_446342 | 1.112967881798767  |
| NP_446343 | -1                 |
| NP_446344 | 1.2706496103226645 |
| NP_446345 | -1                 |
| NP_446346 | 1.5550525091585063 |
| NP_446347 | 1.207237030235377  |
| NP_446348 | 0.9302569036586026 |
| NP_446349 | 1.0288895028297775 |
| NP_446351 | 0.9543884770044282 |
| NP_446353 | -1                 |
| NP_446354 | 1.1606585439212893 |
| NP_446355 | -1                 |
| NP_446356 | 0.8379999584105041 |
| NP_446357 | 0.9329233777825716 |
| NP_446358 | 1.5101186168315952 |
| NP_446359 | 1.2562268526905243 |
| NP_446360 | 1.4276344208432687 |
| NP_446361 | 1.2814914193435054 |
| NP_446362 | 0.9597990693010292 |
| NP_446363 | 1.2832176767957468 |
| NP_446364 | 0.7622749987235742 |
| NP_446369 | 0.9467373966293833 |
| NP_446370 | -1                 |
| NP_446371 | 1.0477948381736106 |
| NP_446372 | 0.8212078110736446 |
| NP_446373 | 1.3300991974234402 |
| NP_446374 | -1                 |
| NP_446375 | 1.3172297122078698 |
| NP_446376 | 1.2707928360706084 |
| NP_446377 | 1.0120384101327031 |
| NP_446378 | 1.6290996142184373 |
| NP_446379 | 0.2958165623394425 |
| NP_446380 | 1.0620723123045097 |
| NP_446381 | 0.5701277503664012 |
| NP_446383 | 1.0015927898209482 |
| NP_446385 | 1.346920772093885  |



|           |                    |
|-----------|--------------------|
| NP_446386 | 0.6602823070815956 |
| NP_446388 | 1.7778717374371193 |
| NP_446389 | 1.4463629299160896 |
| NP_446397 | -1                 |
| NP_446398 | 1.1223956976005038 |
| NP_446399 | -1                 |
| NP_446400 | 1.0646843524477614 |
| NP_446401 | 2.3580109202492303 |
| NP_446402 | 0.943654326314892  |
| NP_446403 | 1.3599268446450843 |
| NP_446404 | 1.5455268995082927 |
| NP_446405 | 0.5598647852980461 |
| NP_446406 | -1                 |
| NP_446407 | 1.1438022700277084 |
| NP_446409 | 1.0855696932238719 |
| NP_446410 | -1                 |
| NP_446411 | 0.936277629037801  |
| NP_446412 | 2.2366937850372395 |
| NP_446413 | 0.5707649166134304 |
| NP_446414 | -1                 |
| NP_446415 | 2.204331414542519  |
| NP_446416 | -1                 |
| NP_446417 | 0.6605673231869148 |
| NP_446419 | 1.1658211045178473 |
| NP_446420 | -1                 |
| NP_446421 | 1.082135995915265  |
| NP_446422 | 0.9001068305086702 |
| NP_446423 | 1.0240782547605196 |
| NP_446424 | 1.0209648559453826 |
| NP_446425 | 1.057980789576552  |
| NP_446426 | 1.0591693258134027 |
| NP_446429 | -1                 |
| NP_446430 | 1.2292259479227894 |
| NP_446431 | 1.1268502633414479 |
| NP_446432 | 0.9625075351833371 |
| NP_446433 | 1.2397094964212256 |
| NP_446434 | 1.162525800827203  |
| NP_446435 | -1                 |
| NP_446436 | -1                 |
| NP_446437 | 0.7752083167944143 |
| NP_446438 | 1.1538948005619094 |
| NP_446440 | -1                 |
| NP_446442 | 1.1016183132949433 |
| NP_446444 | 1.4847036543871364 |
| NP_446446 | -1                 |
| NP_446447 | 0.6995751600337075 |
| NP_446448 | 1.00711275219632   |
| NP_446449 | 1.0919458765742092 |
| NP_446450 | 0.9154577943849552 |
| NP_446451 | 1.0698969344175449 |
| NP_446452 | -1                 |
| NP_446453 | 0.6547786684909866 |
| NP_446454 | 1.5242162844690206 |
| NP_446455 | 1.2721353591006992 |
| NP_446456 | 1.0839037139191519 |
| NP_446457 | 1.20224699283      |
| NP_446458 | 1.021881107309636  |
| NP_446459 | 1.224710874869927  |
| NP_446460 | 1.2879061257453053 |
| NP_446461 | -1                 |
| NP_446462 | -1                 |
| NP_446463 | 1.1092974410735088 |

|           |                     |
|-----------|---------------------|
| NP_476438 | 1.1553505379545532  |
| NP_476439 | 0.7604310325143571  |
| NP_476441 | 1.2595708641667889  |
| NP_476442 | 0.8625657428456155  |
| NP_476443 | 1.0297518672984725  |
| NP_476444 | 2.318122050038637   |
| NP_476445 | 0.7732890141671723  |
| NP_476446 | 0.9986323677330842  |
| NP_476448 | 0.8225048437558649  |
| NP_476449 | 0.12979724696863798 |
| NP_476450 | 0.9838584452139334  |
| NP_476455 | 1.2280021539828323  |
| NP_476456 | 1.7784010088824713  |
| NP_476457 | -1                  |
| NP_476459 | -1                  |
| NP_476461 | 0.8331057610874358  |
| NP_476462 | -1                  |
| NP_476463 | 0.9752584367839855  |
| NP_476464 | 0.8584248257176096  |
| NP_476465 | 1.3638284550918223  |
| NP_476466 | 0.6525691385316028  |
| NP_476468 | -1                  |
| NP_476470 | 1.035831873599643   |
| NP_476471 | -1                  |
| NP_476472 | 1.2050760078092821  |
| NP_476473 | 1.1928479577442221  |
| NP_476474 | -1                  |
| NP_476476 | 1.3536610631514623  |
| NP_476477 | 1.1447128482799642  |
| NP_476478 | 1.127048886330412   |
| NP_476479 | -1                  |
| NP_476480 | 0.9601352048368953  |
| NP_476481 | 1.1943001851141428  |
| NP_476482 | 1.0128932921257143  |
| NP_476483 | 1.1381954500349296  |
| NP_476484 | 0.816089866862508   |
| NP_476485 | 0.9967682016574848  |
| NP_476487 | -1                  |
| NP_476488 | 0.9784486598239567  |
| NP_476489 | 1.0188130199041592  |
| NP_476490 | -1                  |
| NP_476492 | 1.7564759107511534  |
| NP_476493 | 1.020453638595125   |
| NP_476496 | -1                  |
| NP_476497 | -1                  |
| NP_476532 | -1                  |
| NP_476533 | -1                  |
| NP_476534 | 0.3430942388651647  |
| NP_476535 | 1.1661285261258154  |
| NP_476536 | 1.378625096517034   |
| NP_476538 | 1.3353984885012948  |
| NP_476539 | 1.5272895181878168  |
| NP_476540 | 0.8167452358003208  |
| NP_476541 | 1.1355718495591576  |
| NP_476542 | 0.7427980251596435  |
| NP_476543 | 1.0302671438171223  |
| NP_476544 | 1.834954472355103   |
| NP_476545 | 0.6610750930378559  |
| NP_476546 | 1.325899358911742   |
| NP_476547 | -1                  |
| NP_476548 | 1.1926806093371662  |
| NP_476549 | 1.0997955588074173  |

|           |                     |
|-----------|---------------------|
| NP_476552 | 0.954135417391409   |
| NP_476553 | 0.8482325767489255  |
| NP_476554 | -1                  |
| NP_476555 | 1.0620225583030427  |
| NP_476556 | 1.4192508475071264  |
| NP_476557 | 1.2504907635254454  |
| NP_476558 | 0.8749597847132601  |
| NP_476559 | 0.9153561226038567  |
| NP_476560 | 1.1627501229649844  |
| NP_476561 | 0.7060828498150095  |
| NP_478115 | -1                  |
| NP_478116 | -1                  |
| NP_478118 | 1.6673268552492824  |
| NP_478120 | 0.9165572606496512  |
| NP_511172 | 1.1330123887537422  |
| NP_511174 | 1.1189347267845937  |
| NP_511175 | 1.0635580151259567  |
| NP_511176 | -1                  |
| NP_511177 | 1.3781163676986175  |
| NP_511178 | 0.843314714283118   |
| NP_536319 | 2.9401700567801257  |
| NP_536321 | 0.9308485465171277  |
| NP_536322 | -1                  |
| NP_536324 | 1.0923532296461786  |
| NP_536325 | 1.0938929234090407  |
| NP_536335 | 0.8095947819886766  |
| NP_536336 | 1.1190950428284048  |
| NP_536725 | 1.061596772570665   |
| NP_536726 | 1.124401126750427   |
| NP_536727 | 0.35320230485930443 |
| NP_536728 | 1.3438010076467     |
| NP_536729 | 0.8192809618100436  |
| NP_536730 | 1.0283365794460622  |
| NP_542143 | -1                  |
| NP_542144 | 1.1448388100601894  |
| NP_542147 | 0.5917883935074361  |
| NP_542148 | 0.9537179696962502  |
| NP_542149 | 0.993535090139582   |
| NP_542150 | 1.2334329977131597  |
| NP_542151 | 1.3362474013717547  |
| NP_542152 | 0.903280865735309   |
| NP_542153 | -1                  |
| NP_542154 | -1                  |
| NP_542419 | 4.097866977336842   |
| NP_542420 | 2.016224741624753   |
| NP_542421 | 1.5104647441954533  |
| NP_542422 | -1                  |
| NP_542423 | 1.1410745708005037  |
| NP_542424 | -1                  |
| NP_542425 | -1                  |
| NP_542426 | 1.104774449131711   |
| NP_542427 | 0.8671728355318825  |
| NP_542428 | 0.9336745504929346  |
| NP_542429 | 3.2228943362245226  |
| NP_542944 | 1.444643328152891   |
| NP_542945 | 1.6427525114705832  |
| NP_542946 | -1                  |
| NP_542947 | 1.0892641368375469  |
| NP_542951 | 1.1329511108700776  |
| NP_542953 | -1                  |
| NP_542954 | 1.3385805604730268  |
| NP_542955 | -1                  |

|           |                     |
|-----------|---------------------|
| NP_542956 | 0.7575583921017024  |
| NP_542958 | 0.9370944205430269  |
| NP_542959 | 1.111794183723162   |
| NP_542960 | 1.837015103835302   |
| NP_542961 | 0.8494377137083386  |
| NP_542963 | 1.216787783494487   |
| NP_542964 | 0.8972713359803545  |
| NP_542965 | 1.1305838798759684  |
| NP_543161 | 1.2926511898886979  |
| NP_543162 | 1.305218623137524   |
| NP_543163 | 1.0211154462634895  |
| NP_543164 | 0.8938509342770444  |
| NP_543166 | 1.3245485755474424  |
| NP_543167 | 1.2092395984183208  |
| NP_543168 | 1.0801901734012012  |
| NP_543169 | 1.3837801848951325  |
| NP_543170 | -1                  |
| NP_543171 | 1.0168170981247864  |
| NP_543172 | 1.2482799527142692  |
| NP_543173 | 0.863643018401206   |
| NP_543174 | -1                  |
| NP_543175 | 0.9301995467217883  |
| NP_543176 | 0.9283832724341421  |
| NP_543177 | -1                  |
| NP_543178 | 1.083251312479822   |
| NP_543179 | -1                  |
| NP_543180 | 1.0976986540370344  |
| NP_543181 | 1.2290427505671193  |
| NP_543182 | 0.6923893930046651  |
| NP_543183 | 1.1089346973397207  |
| NP_543184 | -1                  |
| NP_543186 | 1.243466172697382   |
| NP_569083 | 1.0785468114518801  |
| NP_569084 | 0.9779912477351287  |
| NP_569085 | -1                  |
| NP_569086 | 3.041548865982145   |
| NP_569087 | -1                  |
| NP_569088 | 0.36256318971865675 |
| NP_569089 | 1.0245887437861916  |
| NP_569090 | 1.0762885437734733  |
| NP_569091 | 0.7236159585213188  |
| NP_569092 | -1                  |
| NP_569093 | 1.0282134256226008  |
| NP_569094 | -1                  |
| NP_569095 | 2.208958663585127   |
| NP_569096 | 0.8553660771830095  |
| NP_569097 | 1.0144835867518036  |
| NP_569098 | 1.0378792225300737  |
| NP_569099 | 0.5536433441930064  |
| NP_569100 | 1.164068148027892   |
| NP_569103 | 1.8333222676835415  |
| NP_569104 | 0.9409336706755252  |
| NP_569105 | 1.8687520491775624  |
| NP_569106 | 2.1884725005735635  |
| NP_569107 | -1                  |
| NP_569108 | 1.109782140398772   |
| NP_569109 | 0.9148890391359292  |
| NP_569110 | 1.0480942404464486  |
| NP_569112 | 0.7538520053738523  |
| NP_569113 | 4.516152464708735   |
| NP_569114 | 0.8876425305193809  |
| NP_569115 | -1                  |

|           |                    |
|-----------|--------------------|
| NP_569116 | 1.1014019294078965 |
| NP_569117 | 0.6630910320189208 |
| NP_570090 | 1.0900291666039355 |
| NP_570091 | -1                 |
| NP_570092 | 1.4689319935735823 |
| NP_570093 | 1.0866341118280713 |
| NP_570094 | 0.8264109600512787 |
| NP_570095 | -1                 |
| NP_570096 | 1.5203068877955994 |
| NP_570097 | 0.470328767278795  |
| NP_570098 | -1                 |
| NP_570100 | 1.0456942323561373 |
| NP_570102 | 1.526140248143838  |
| NP_570103 | -1                 |
| NP_570104 | 0.594977005656538  |
| NP_570105 | 0.9070044841685746 |
| NP_570106 | -1                 |
| NP_570107 | -1                 |
| NP_570108 | -1                 |
| NP_570109 | -1                 |
| NP_570110 | 0.9262444697348858 |
| NP_570111 | 1.033492179131376  |
| NP_570112 | 1.244313003402214  |
| NP_570135 | 0.9665598075725359 |
| NP_570825 | -1                 |
| NP_570826 | 1.168249991813138  |
| NP_570827 | -1                 |
| NP_570829 | -1                 |
| NP_570830 | 2.289362693745594  |
| NP_570831 | 0.9458357300478268 |
| NP_570832 | 1.2705443729482204 |
| NP_570833 | -1                 |
| NP_570834 | -1                 |
| NP_570835 | 0.8570284311850355 |
| NP_570836 | 1.0764808982652598 |
| NP_570837 | -1                 |
| NP_570838 | -1                 |
| NP_570839 | 0.9886059026116971 |
| NP_570842 | 0.8671903487933355 |
| NP_570964 | 0.9921966868461028 |
| NP_571977 | 1.2826289314523582 |
| NP_571979 | 1.3079692187756093 |
| NP_571980 | -1                 |
| NP_571981 | 0.9876090177311109 |
| NP_571982 | 1.3909636642832532 |
| NP_571983 | -1                 |
| NP_571984 | -1                 |
| NP_571985 | 1.2325798121461633 |
| NP_571986 | 1.188199736673997  |
| NP_571987 | -1                 |
| NP_571988 | 0.9368921116860706 |
| NP_571989 | 1.2304764429176902 |
| NP_579817 | 0.914391483398877  |
| NP_579818 | -1                 |
| NP_579819 | 0.7891969699520923 |
| NP_579820 | -1                 |
| NP_579823 | -1                 |
| NP_579824 | 0.9778551194953208 |
| NP_579825 | 1.3185674736969668 |
| NP_579827 | 1.652399076309593  |
| NP_579828 | 1.0477120130103572 |
| NP_579829 | -1                 |

|           |                    |
|-----------|--------------------|
| NP_579830 | 0.94621981111142   |
| NP_579831 | 1.0643941382497004 |
| NP_579832 | 1.087835465800172  |
| NP_579833 | 1.0158307326751481 |
| NP_579834 | 1.1383393940118178 |
| NP_579835 | 1.4286972152901114 |
| NP_579836 | -1                 |
| NP_579837 | 1.8605888528659804 |
| NP_579838 | 0.6579870153184791 |
| NP_579839 | 1.561785470046946  |
| NP_579840 | 1.058396394783524  |
| NP_579841 | 1.034923268317367  |
| NP_579842 | -1                 |
| NP_579843 | 1.0373436854405587 |
| NP_579844 | 0.919273950042502  |
| NP_579845 | -1                 |
| NP_579846 | 1.2980653255837695 |
| NP_579847 | 1.0610216005688522 |
| NP_579848 | 1.4662290421560433 |
| NP_579849 | 1.0232857068523182 |
| NP_579850 | 1.1447728964738568 |
| NP_579851 | 1.3715602235919973 |
| NP_579852 | 2.1104388630011006 |
| NP_579854 | 0.9633805580836402 |
| NP_579855 | -1                 |
| NP_579856 | -1                 |
| NP_579857 | 1.355576034311402  |
| NP_579858 | 1.3175316443082208 |
| NP_596871 | 0.9655454170160561 |
| NP_596872 | 1.0854853739755248 |
| NP_596874 | 1.0725031820580593 |
| NP_596876 | -1                 |
| NP_596877 | 1.3845234004114477 |
| NP_596878 | 0.4256083605210528 |
| NP_596883 | 1.8139585414815935 |
| NP_596884 | 1.741484052973893  |
| NP_596885 | 1.21204693987494   |
| NP_596886 | 0.8232019791976172 |
| NP_596887 | 1.4164572148195484 |
| NP_596888 | 1.0626772554482347 |
| NP_596889 | 1.2014467112141678 |
| NP_596891 | 0.9074176908098356 |
| NP_596892 | 2.042000742336932  |
| NP_596893 | 1.1043548636200966 |
| NP_596894 | 1.1041209686286269 |
| NP_596895 | 1.0865515139677766 |
| NP_596896 | -1                 |
| NP_596897 | 1.0367798762141807 |
| NP_596900 | 1.0794369049524122 |
| NP_596901 | 1.182360638661975  |
| NP_596903 | 0.8052106144251212 |
| NP_596904 | 1.279820810888698  |
| NP_596905 | 1.3253243626147753 |
| NP_596906 | 1.090383989067637  |
| NP_596907 | 2.0836862474128597 |
| NP_596908 | 1.153304748580415  |
| NP_596909 | 1.0372888202851667 |
| NP_596910 | 1.2227324968948006 |
| NP_596911 | -1                 |
| NP_596912 | 1.0446378740966449 |
| NP_596913 | 1.0124909014983865 |
| NP_596914 | 1.2784869408698163 |

|           |                    |
|-----------|--------------------|
| NP_596915 | -1                 |
| NP_596916 | 1.477610891916706  |
| NP_596917 | 1.0919616442704256 |
| NP_596918 | 1.0686790470864282 |
| NP_596919 | 1.4539694545122614 |
| NP_596920 | 1.1677976901382756 |
| NP_597684 | 0.5650639054330394 |
| NP_598195 | -1                 |
| NP_598196 | -1                 |
| NP_598197 | -1                 |
| NP_598198 | 19.321381759363593 |
| NP_598199 | -1                 |
| NP_598200 | -1                 |
| NP_598201 | -1                 |
| NP_598202 | 1.2775382038885    |
| NP_598203 | -1                 |
| NP_598205 | 1.07348223593909   |
| NP_598206 | 1.1552441187372011 |
| NP_598207 | 1.8818773727785592 |
| NP_598208 | 0.6138249158681234 |
| NP_598209 | 0.7731167023486986 |
| NP_598210 | 0.9671133141270927 |
| NP_598211 | 0.8905116531777207 |
| NP_598212 | 1.2188221491277142 |
| NP_598213 | 1.2021014014387772 |
| NP_598215 | 1.008602631035644  |
| NP_598216 | -1                 |
| NP_598217 | -1                 |
| NP_598218 | 1.305275999716683  |
| NP_598219 | 1.3054208302302284 |
| NP_598220 | -1                 |
| NP_598221 | -1                 |
| NP_598222 | 1.017351101349165  |
| NP_598223 | 0.9661250489920624 |
| NP_598224 | 1.2747298228985573 |
| NP_598225 | 1.2584609948189822 |
| NP_598226 | 1.5608286530243054 |
| NP_598228 | 0.9293355529778009 |
| NP_598229 | 1.2060514951075982 |
| NP_598230 | 1.2472652627151373 |
| NP_598231 | -1                 |
| NP_598232 | 2.142027997900195  |
| NP_598233 | 0.9581626697262352 |
| NP_598234 | -1                 |
| NP_598235 | 0.3602778696279821 |
| NP_598236 | 0.879549929132029  |
| NP_598237 | 1.4390473515431221 |
| NP_598238 | 1.1067063288691372 |
| NP_598239 | 1.6086438525170645 |
| NP_598240 | 0.8318497573541513 |
| NP_598241 | 0.9358619629758036 |
| NP_598242 | 0.9224671167489573 |
| NP_598243 | 0.9722858685778525 |
| NP_598244 | 0.9539531904700729 |
| NP_598246 | 1.1106504255102514 |
| NP_598247 | 0.7635601594285844 |
| NP_598250 | -1                 |
| NP_598251 | -1                 |
| NP_598252 | -1                 |
| NP_598253 | 1.4515128588584176 |
| NP_598254 | -1                 |
| NP_598255 | 1.1128608924498837 |

|           |                    |
|-----------|--------------------|
| NP_598256 | 1.5601249599601121 |
| NP_598257 | -1                 |
| NP_598258 | 1.2352415313310867 |
| NP_598259 | 0.542427132592856  |
| NP_598261 | 0.7760103985224861 |
| NP_598262 | 2.72332061144561   |
| NP_598263 | 0.7788573489184526 |
| NP_598264 | 1.1425230625749008 |
| NP_598265 | -1                 |
| NP_598266 | 1.0479027962215592 |
| NP_598267 | 1.1769689264804326 |
| NP_598268 | 0.9609366916525754 |
| NP_598269 | 1.0352097725337552 |
| NP_598270 | 0.5802130305309463 |
| NP_598271 | -1                 |
| NP_598273 | 0.9429836072072063 |
| NP_598274 | 0.8610974506129047 |
| NP_598275 | 1.1283540628312598 |
| NP_598277 | 0.8584133407855443 |
| NP_598279 | 1.1192315912790936 |
| NP_598280 | 0.8638287093943418 |
| NP_598281 | -1                 |
| NP_598282 | 1.0254718679539614 |
| NP_598283 | 20.96799299448381  |
| NP_598284 | 0.8540078822942468 |
| NP_598285 | 0.826534313801001  |
| NP_598286 | 1.1744520016832323 |
| NP_598287 | -1                 |
| NP_598289 | 1.0767948055217633 |
| NP_598290 | -1                 |
| NP_598291 | 1.3790912139068732 |
| NP_598292 | 1.1761739736599244 |
| NP_598293 | 1.2231906231100054 |
| NP_598294 | 0.633215972507405  |
| NP_598295 | 1.15470243528595   |
| NP_598298 | -1                 |
| NP_598299 | 1.5470542466932038 |
| NP_598300 | 1.1073373775614548 |
| NP_598301 | 1.2175441237316431 |
| NP_598302 | 1.4457974881866285 |
| NP_598303 | -1                 |
| NP_598304 | 1.0678244164011599 |
| NP_598305 | 1.7089025245731364 |
| NP_598306 | -1                 |
| NP_598307 | -1                 |
| NP_598308 | 1.5197619453335445 |
| NP_598413 | 1.1018341659043083 |
| NP_599153 | 1.1359925065817724 |
| NP_599155 | 1.0049362145712903 |
| NP_599156 | 2.118669552083952  |
| NP_599157 | 1.4003274849140137 |
| NP_599158 | -1                 |
| NP_599159 | 1.036457733451534  |
| NP_599161 | 1.3505960899485512 |
| NP_599162 | 1.1316395001370803 |
| NP_599163 | 1.1449440499593324 |
| NP_599167 | 0.8150263517134517 |
| NP_599173 | 1.2138905120792474 |
| NP_599176 | 1.1419421277076618 |
| NP_599177 | 0.9760873091052584 |
| NP_599178 | 0.9814420767266405 |
| NP_599179 | 2.207127976195466  |



|           |                    |
|-----------|--------------------|
| NP_599180 | 1.2124126655107732 |
| NP_599188 | -1                 |
| NP_599190 | 1.3554467965949009 |
| NP_599191 | 0.9906212641019132 |
| NP_599192 | 0.9495169730131755 |
| NP_599193 | 1.1154095804659658 |
| NP_599196 | -1                 |
| NP_599197 | -1                 |
| NP_599198 | 0.9828434006087856 |
| NP_599199 | -1                 |
| NP_599200 | 1.2435536256266095 |
| NP_599201 | 1.4112206183028175 |
| NP_599203 | 1.4031882954980766 |
| NP_599204 | -1                 |
| NP_599205 | 0.5569719599279078 |
| NP_599206 | 1.105055139782187  |
| NP_599207 | 1.2592814656485378 |
| NP_599209 | 1.1014748275233515 |
| NP_599210 | 0.5987522054507934 |
| NP_599211 | -1                 |
| NP_599212 | 0.9688409173001294 |
| NP_599213 | 1.1691512397216621 |
| NP_599214 | -1                 |
| NP_599215 | -1                 |
| NP_599216 | -1                 |
| NP_599217 | 1.679054525068467  |
| NP_599218 | 0.9860219032911952 |
| NP_599219 | 0.9363404012389883 |
| NP_599220 | 0.2802265763767142 |
| NP_599221 | 1.2223225714881913 |
| NP_599222 | 1.342283667913187  |
| NP_599223 | -1                 |
| NP_599225 | 1.2500511113643162 |
| NP_599227 | -1                 |
| NP_599228 | -1                 |
| NP_599229 | 0.670132660552596  |
| NP_599230 | 0.7700815467547765 |
| NP_599231 | -1                 |
| NP_599232 | 1.1607760792546769 |
| NP_599233 | 1.2297194798985904 |
| NP_599234 | 0.6654846565874982 |
| NP_599235 | 2.9096196475349823 |
| NP_599236 | -1                 |
| NP_599237 | 0.5387092510782813 |
| NP_599238 | 1.0947716536496424 |
| NP_599239 | 1.3910736274377307 |
| NP_599240 | 1.2175323412216117 |
| NP_599241 | 1.2312228496574855 |
| NP_599242 | 0.978093472520995  |
| NP_599243 | 1.1854537726125711 |
| NP_599244 | 2.0458873893401273 |
| NP_599245 | 1.3680254952642987 |
| NP_599246 | 1.0313586299407216 |
| NP_602308 | -1                 |
| NP_604444 | 1.2942489977005207 |
| NP_604447 | 0.894902722545134  |
| NP_604448 | 1.2157463998742981 |
| NP_604450 | 0.6098911791899843 |
| NP_604451 | 1.2339022852484833 |
| NP_604452 | 1.3662359990137811 |
| NP_604453 | 1.1733095663153577 |
| NP_604454 | -1                 |

|           |                    |
|-----------|--------------------|
| NP_604456 | 2.8839203687454797 |
| NP_604457 | -1                 |
| NP_604460 | 0.9202965725515596 |
| NP_604461 | 0.7703919249964213 |
| NP_604462 | 1.2253863442511237 |
| NP_604463 | 0.7150133377182158 |
| NP_608302 | 0.96041504148383   |
| NP_612511 | -1                 |
| NP_612513 | 1.6654060009022118 |
| NP_612514 | -1                 |
| NP_612515 | -1                 |
| NP_612516 | 3.500896912069269  |
| NP_612517 | 0.8390531284654416 |
| NP_612518 | 1.3850927588147064 |
| NP_612519 | 0.8777189511432382 |
| NP_612520 | 1.1107220892178242 |
| NP_612521 | -1                 |
| NP_612522 | -1                 |
| NP_612523 | -1                 |
| NP_612524 | 0.7563213982254756 |
| NP_612526 | 3.996148559334898  |
| NP_612527 | 0.9686845900762341 |
| NP_612528 | 1.0862210979362161 |
| NP_612529 | 1.1834986253377568 |
| NP_612531 | 1.6980673069126708 |
| NP_612532 | 1.0104550387245739 |
| NP_612533 | 0.6101221937893849 |
| NP_612534 | 1.0563894212444802 |
| NP_612536 | -1                 |
| NP_612537 | 1.0878475420370604 |
| NP_612539 | -1                 |
| NP_612540 | 1.0079730947489058 |
| NP_612541 | 0.8646969257234317 |
| NP_612542 | 1.2977084960542316 |
| NP_612544 | 1.0377864188815606 |
| NP_612545 | 1.0489495856886615 |
| NP_612546 | 1.139981073624347  |
| NP_612547 | 0.949166005789636  |
| NP_612548 | 1.1648636917699224 |
| NP_612550 | -1                 |
| NP_612551 | -1                 |
| NP_612552 | -1                 |
| NP_612553 | 0.947528129161157  |
| NP_612556 | 0.2928958038015068 |
| NP_612558 | 1.378798691838807  |
| NP_619516 | -1                 |
| NP_619715 | 1.211331900182692  |
| NP_619724 | 1.188694127985367  |
| NP_620178 | 0.7330177920003067 |
| NP_620181 | 0.6220457780575952 |
| NP_620182 | 1.6826379518964834 |
| NP_620183 | 0.9166903883393979 |
| NP_620184 | 0.7835045306791838 |
| NP_620186 | -1                 |
| NP_620187 | 0.7972701295900618 |
| NP_620188 | 1.1881940183786717 |
| NP_620190 | -1                 |
| NP_620191 | -1                 |
| NP_620193 | 1.141663609479083  |
| NP_620194 | 1.3138410011774773 |
| NP_620195 | 1.065462025432827  |
| NP_620196 | -1                 |

|           |                    |
|-----------|--------------------|
| NP_620197 | 0.9914435010341894 |
| NP_620198 | 0.6553713614202644 |
| NP_620199 | -1                 |
| NP_620202 | 0.8810784374928775 |
| NP_620203 | 0.930496209444287  |
| NP_620204 | 3.796700142521132  |
| NP_620205 | 0.9757028808842674 |
| NP_620206 | -1                 |
| NP_620207 | -1                 |
| NP_620209 | -1                 |
| NP_620210 | 1.0025543778203518 |
| NP_620211 | 1.522132071560927  |
| NP_620212 | 1.2336751579555754 |
| NP_620213 | 2.3854196079194563 |
| NP_620214 | 1.0903826326474992 |
| NP_620216 | -1                 |
| NP_620217 | 2.179990369084634  |
| NP_620218 | -1                 |
| NP_620219 | 1.1743498938786905 |
| NP_620220 | 0.8865164573210085 |
| NP_620221 | 0.9858967532037317 |
| NP_620222 | 1.2171600899542987 |
| NP_620225 | 1.0851703659405003 |
| NP_620226 | 1.0062133093856678 |
| NP_620227 | -1                 |
| NP_620228 | 0.9722696468283932 |
| NP_620229 | 1.202801754154393  |
| NP_620230 | -1                 |
| NP_620231 | 1.08558718390306   |
| NP_620232 | 1.2627510714482943 |
| NP_620233 | 0.8566661840704456 |
| NP_620234 | 1.2300306298452337 |
| NP_620235 | -1                 |
| NP_620236 | 1.3576683901099196 |
| NP_620237 | 1.4856981228102304 |
| NP_620238 | 0.763087115017436  |
| NP_620239 | -1                 |
| NP_620240 | 1.0128395508315116 |
| NP_620241 | 0.9613047076132767 |
| NP_620242 | 1.1805709651178207 |
| NP_620243 | 0.7096567142810213 |
| NP_620244 | -1                 |
| NP_620245 | -1                 |
| NP_620246 | 1.206871301132124  |
| NP_620247 | 1.1508502796720244 |
| NP_620248 | -1                 |
| NP_620249 | 2.9531416199681844 |
| NP_620250 | 1.116720709499055  |
| NP_620251 | 1.044798627269554  |
| NP_620252 | 1.3291498584052663 |
| NP_620253 | 1.1181302597120164 |
| NP_620254 | 1.0110148978348235 |
| NP_620255 | 0.6930181546365359 |
| NP_620256 | 0.9209360281682594 |
| NP_620257 | -1                 |
| NP_620259 | 0.97997981095947   |
| NP_620260 | 0.4700807522371624 |
| NP_620261 | -1                 |
| NP_620262 | 1.4718100432732717 |
| NP_620263 | 1.3338034472994122 |
| NP_620264 | 1.4264119528851664 |
| NP_620265 | 0.8464831873102397 |

|           |                     |
|-----------|---------------------|
| NP_620266 | 1.127223721800751   |
| NP_620267 | -1                  |
| NP_620268 | 1.0115567780871333  |
| NP_620269 | 1.1071678349173346  |
| NP_620270 | -1                  |
| NP_620271 | 2.2498292336027337  |
| NP_620272 | 0.9501345651939888  |
| NP_620273 | 0.7704165188006374  |
| NP_620274 | 0.9036103524744958  |
| NP_620275 | 1.3871539237532677  |
| NP_620276 | -1                  |
| NP_620277 | -1                  |
| NP_620431 | 1.408633668974305   |
| NP_620432 | 0.9895218488168833  |
| NP_620433 | -1                  |
| NP_620434 | -1                  |
| NP_620605 | -1                  |
| NP_620606 | 0.43296955775709695 |
| NP_620607 | 1.4937385060711827  |
| NP_620608 | 1.1841491387306706  |
| NP_620609 | 1.412380591221842   |
| NP_620610 | 1.2132142010943638  |
| NP_620611 | 1.2583949659026674  |
| NP_620612 | -1                  |
| NP_620691 | 1.1272812473170424  |
| NP_620780 | 1.0309132304916169  |
| NP_620781 | 1.0869432940633048  |
| NP_620782 | -1                  |
| NP_620784 | 0.9298385492088032  |
| NP_620785 | 0.9737313101894259  |
| NP_620786 | 1.0090427623687923  |
| NP_620787 | -1                  |
| NP_620788 | 0.7393594760073418  |
| NP_620789 | 1.9987415716508972  |
| NP_620790 | 1.0591058304318623  |
| NP_620791 | 1.106246254206034   |
| NP_620793 | 1.116375039874181   |
| NP_620794 | 1.4915720960869665  |
| NP_620795 | 1.273861470116579   |
| NP_620796 | 0.8146806591383974  |
| NP_620797 | 1.1960815894865107  |
| NP_620798 | 1.0733062961106532  |
| NP_620799 | 0.9436591228969745  |
| NP_620800 | 0.9995600548527755  |
| NP_620801 | 0.9327308358114227  |
| NP_620802 | -1                  |
| NP_620803 | 0.8970810227425362  |
| NP_620804 | 0.9280745838590598  |
| NP_620805 | 1.333928357421273   |
| NP_620806 | 0.8057506971386609  |
| NP_620807 | 0.9938003413921573  |
| NP_620808 | 1.0764103620987007  |
| NP_620809 | 1.149862827946345   |
| NP_620810 | 1.206039472589351   |
| NP_620811 | 0.8444399870380728  |
| NP_620812 | -1                  |
| NP_620813 | 0.711344888133535   |
| NP_620814 | 1.058717316373729   |
| NP_620815 | 1.0153771243454401  |
| NP_620816 | 1.0387484889266052  |
| NP_631922 | -1                  |
| NP_631923 | 1.8375407036129783  |

|           |                     |
|-----------|---------------------|
| NP_631924 | 1.0614756948253263  |
| NP_631925 | 0.8531700987187075  |
| NP_631926 | -1                  |
| NP_631928 | 1.0408205353236144  |
| NP_631929 | 1.1187022164091494  |
| NP_631931 | 0.9403261926443665  |
| NP_631932 | -1                  |
| NP_631933 | -1                  |
| NP_631962 | 0.24923733765560982 |
| NP_631963 | -1                  |
| NP_631976 | 0.7547163400102171  |
| NP_631977 | -1                  |
| NP_640347 | 1.1726432594638168  |
| NP_640348 | 1.1355383623901338  |
| NP_640349 | 1.2870393819852188  |
| NP_640350 | -1                  |
| NP_640351 | -1                  |
| NP_640352 | 0.594785169237899   |
| NP_640353 | 0.9466476250707192  |
| NP_640354 | 0.9917380244665729  |
| NP_640355 | -1                  |
| NP_640356 | -1                  |
| NP_647540 | 0.8720452061352167  |
| NP_647541 | 1.0261376338468895  |
| NP_647542 | -1                  |
| NP_647545 | 0.961463615332162   |
| NP_647546 | 1.656743471854986   |
| NP_647547 | 2.089279469653828   |
| NP_647548 | 1.267167544284345   |
| NP_647549 | 1.0442490113028016  |
| NP_647550 | -1                  |
| NP_647551 | 0.8654795973588822  |
| NP_647552 | 0.8991754312769217  |
| NP_647553 | -1                  |
| NP_647557 | 1.696362304462797   |
| NP_647558 | 0.8746783579501413  |
| NP_653331 | 1.0903028481651806  |
| NP_653341 | 1.3113273470555626  |
| NP_653343 | 1.085127692481515   |
| NP_653346 | 1.1350558128587271  |
| NP_653347 | 1.162593937306031   |
| NP_653349 | 1.1020156985995215  |
| NP_653350 | -1                  |
| NP_653351 | -1                  |
| NP_653352 | -1                  |
| NP_653353 | -1                  |
| NP_653354 | 1.1570877219196911  |
| NP_653356 | 1.9282510151069048  |
| NP_653357 | -1                  |
| NP_653358 | 1.8372358223848408  |
| NP_653359 | 1.1204485437337741  |
| NP_653360 | 1.10259582050045    |
| NP_658907 | -1                  |
| NP_659549 | 1.5251080258056968  |
| NP_659550 | 0.9245479938051581  |
| NP_659551 | 2.080161725273369   |
| NP_659552 | 0.8425549147011925  |
| NP_659553 | 0.9018306330018602  |
| NP_659555 | -1                  |
| NP_659556 | -1                  |
| NP_659557 | 0.9706964989146896  |
| NP_659558 | 0.8575006074297786  |

|           |                     |
|-----------|---------------------|
| NP_659559 | 0.9630918585957682  |
| NP_659560 | 0.8426690894373099  |
| NP_659561 | -1                  |
| NP_659562 | 1.1348557060951852  |
| NP_659563 | -1                  |
| NP_659564 | 1.411665339224669   |
| NP_659565 | 1.135358752847021   |
| NP_659566 | 0.22048558934425888 |
| NP_660185 | 1.029214093694168   |
| NP_663703 | 1.09247075517993    |
| NP_663711 | 1.1397757724967488  |
| NP_663715 | -1                  |
| NP_663716 | 1.1493385315598175  |
| NP_663769 | 1.3441404862719253  |
| NP_663773 | -1                  |
| NP_663775 | 1.4651567164958268  |
| NP_663776 | 1.1060636514344142  |
| NP_665708 | 1.5207181391256401  |
| NP_665709 | 1.0155165383736986  |
| NP_665710 | -1                  |
| NP_665711 | -1                  |
| NP_665713 | 0.9747685492707762  |
| NP_665714 | -1                  |
| NP_665715 | 1.111480680181814   |
| NP_665716 | 1.6322945307841863  |
| NP_665717 | 1.1510314441904497  |
| NP_665718 | 1.765427297922774   |
| NP_665719 | -1                  |
| NP_665720 | -1                  |
| NP_665721 | 1.1607353670450589  |
| NP_665722 | -1                  |
| NP_665723 | 1.843134920950403   |
| NP_665724 | 0.7398180980953827  |
| NP_665725 | -1                  |
| NP_665726 | 1.0629122250715732  |
| NP_665728 | 1.7384067459212267  |
| NP_665729 | -1                  |
| NP_665730 | 0.9215548314256647  |
| NP_665731 | 1.2106191549520475  |
| NP_665732 | 0.8408112328555356  |
| NP_665733 | 0.9842036619182425  |
| NP_665884 | 0.9401875712404356  |
| NP_665885 | 2.9980691545620775  |
| NP_665886 | 1.9044154579112047  |
| NP_665887 | 1.0120205657171246  |
| NP_671476 | -1                  |
| NP_671477 | 1.0977187917686186  |
| NP_671478 | -1                  |
| NP_671479 | 0.8687749633231027  |
| NP_671481 | 0.8204220524721958  |
| NP_671482 | 1.6540151933784035  |
| NP_671483 | 1.0795515246886624  |
| NP_671484 | -1                  |
| NP_671486 | 3.314968938636138   |
| NP_671487 | -1                  |
| NP_671694 | -1                  |
| NP_671706 | 0.8967680753788138  |
| NP_671738 | 1.446672126925334   |
| NP_671739 | 1.2095432410998284  |
| NP_671742 | 0.8599132690175101  |
| NP_671743 | 2.1142834724344004  |
| NP_671744 | 1.0844309712176337  |

|           |                    |
|-----------|--------------------|
| NP.671747 | -1                 |
| NP.671748 | 1.0110733829365846 |
| NP.671749 | 0.9850147830355261 |
| NP.683687 | 1.2109412643046087 |
| NP.683689 | 1.0532648523734343 |
| NP.683690 | 0.8335488371446438 |
| NP.690003 | 1.6053120977198205 |
| NP.690600 | 0.9202680689329128 |
| NP.690918 | 1.0490757965732374 |
| NP.690919 | 0.9834199896841126 |
| NP.695206 | -1                 |
| NP.695207 | 1.1215011740541874 |
| NP.695208 | 2.0085535920597253 |
| NP.695209 | 0.9908002744025849 |
| NP.695210 | -1                 |
| NP.695214 | 0.857381390788138  |
| NP.695215 | 0.8169483941508631 |
| NP.695216 | 0.9938155249171894 |
| NP.695218 | 0.7967890763684166 |
| NP.695219 | 1.315380199683566  |
| NP.695220 | 0.8900072560257632 |
| NP.695222 | -1                 |
| NP.695223 | -1                 |
| NP.695224 | -1                 |
| NP.695225 | -1                 |
| NP.695226 | -1                 |
| NP.695227 | 0.5905570388028358 |
| NP.695228 | 2.012011465813126  |
| NP.695229 | 0.8529664057441896 |
| NP.695230 | 0.8517926686244851 |
| NP.703195 | 1.1568903336745195 |
| NP.703196 | 1.2734292344601754 |
| NP.703199 | 0.9409439130355671 |
| NP.703200 | 1.2255459209479695 |
| NP.703202 | 0.8729460541838523 |
| NP.703203 | 1.036222023379296  |
| NP.705888 | -1                 |
| NP.705891 | 0.9976582494237948 |
| NP.705892 | 0.9907123521505232 |
| NP.705893 | 0.887362184103722  |
| NP.705894 | 1.0030994863221174 |
| NP.714942 | 1.4212023562186125 |
| NP.714943 | -1                 |
| NP.714944 | 0.5892699478166444 |
| NP.714947 | 1.2586213172344263 |
| NP.714951 | -1                 |
| NP.714953 | 0.9551610719037088 |
| NP.714954 | 1.3001237751528056 |
| NP.714956 | -1                 |
| NP.714957 | -1                 |
| NP.714958 | -1                 |
| NP.722543 | 0.801750110200059  |
| NP.733836 | 0.7538511664483165 |
| NP.740769 | 1.171811338554358  |
| NP.740770 | 1.05330344747198   |
| NP.741984 | 0.8306142460040723 |
| NP.741985 | 1.1969705578444443 |
| NP.741987 | 0.8370899881328082 |
| NP.741988 | 1.0295092925604765 |
| NP.741989 | 3.0320456510282963 |
| NP.741990 | 1.065882482793581  |
| NP.741991 | 1.0477579822377467 |

|           |                    |
|-----------|--------------------|
| NP_741992 | 1.2249343592901512 |
| NP_741993 | 1.107408646716062  |
| NP_742005 | 1.0609942972372373 |
| NP_742015 | 0.7488309017595651 |
| NP_742018 | 0.7062675101188733 |
| NP_742019 | 0.9090576040106956 |
| NP_742026 | 0.8122951272290521 |
| NP_742027 | -1                 |
| NP_742030 | 1.0900258096446542 |
| NP_742031 | 0.9654636602093335 |
| NP_742032 | 0.7316658946520965 |
| NP_742033 | 0.901594092834716  |
| NP_742035 | 0.5009776388475468 |
| NP_742036 | 0.6692969461489556 |
| NP_742037 | 0.8518086747572617 |
| NP_742039 | 0.8299079394289732 |
| NP_742041 | 0.6951012708197947 |
| NP_742042 | 1.0567276923296436 |
| NP_742045 | 1.2976623515734909 |
| NP_742052 | 0.597871071592638  |
| NP_742059 | 0.8541554510545402 |
| NP_742060 | 0.9780331195633559 |
| NP_742062 | -1                 |
| NP_742063 | 1.0420786624115304 |
| NP_742064 | 1.1675398328496982 |
| NP_742065 | 0.9381185337309456 |
| NP_742069 | 0.9354562895274422 |
| NP_742070 | -1                 |
| NP_742071 | 0.8553698965166107 |
| NP_742072 | 0.9441878187439913 |
| NP_742074 | -1                 |
| NP_742087 | 1.6593290707196298 |
| NP_742089 | -1                 |
| NP_742090 | 0.9275675728821583 |
| NP_750843 | 1.235131218666171  |
| NP_750845 | 1.0009422235203382 |
| NP_757377 | 1.1160767830551528 |
| NP_757378 | 0.7579403275104216 |
| NP_758443 | 0.7493297031398692 |
| NP_758528 | -1                 |
| NP_758823 | -1                 |
| NP_758824 | -1                 |
| NP_758825 | 0.9213201468477669 |
| NP_758826 | 0.6994243720272655 |
| NP_758829 | 0.7554752575701532 |
| NP_758830 | 1.1436320983625587 |
| NP_758832 | 1.208179798261438  |
| NP_758835 | 1.385860741172097  |
| NP_758837 | 1.1407416128674404 |
| NP_758838 | 1.8647403207116693 |
| NP_758839 | 0.7105621099413814 |
| NP_775117 | -1                 |
| NP_775118 | -1                 |
| NP_775119 | 1.3859283177922501 |
| NP_775120 | 1.2710110995330766 |
| NP_775121 | 0.8772295448132456 |
| NP_775122 | 1.0819659482313584 |
| NP_775123 | 1.5801279892730793 |
| NP_775124 | 1.191124739627305  |
| NP_775125 | 1.3009246607202152 |
| NP_775126 | 0.8834490738991346 |
| NP_775128 | -1                 |



|           |                    |
|-----------|--------------------|
| NP_775134 | 1.1334972269014538 |
| NP_775135 | 1.3763116996823488 |
| NP_775136 | -1                 |
| NP_775137 | 0.7604130846436143 |
| NP_775140 | 0.8853950439290855 |
| NP_775141 | 1.3916994356743138 |
| NP_775143 | 0.9496093213167445 |
| NP_775146 | 1.4365500760992134 |
| NP_775147 | 0.788722747088567  |
| NP_775148 | 1.2979093201230782 |
| NP_775149 | 1.3975269396035686 |
| NP_775150 | -1                 |
| NP_775151 | -1                 |
| NP_775152 | -1                 |
| NP_775153 | -1                 |
| NP_775155 | -1                 |
| NP_775156 | 0.9181029827736169 |
| NP_775158 | -1                 |
| NP_775159 | 3.010777074355128  |
| NP_775160 | 1.594146608666272  |
| NP_775161 | 0.9737468912564466 |
| NP_775162 | -1                 |
| NP_775163 | -1                 |
| NP_775165 | 0.961700456506382  |
| NP_775166 | 1.0092119096954693 |
| NP_775167 | -1                 |
| NP_775168 | 1.0241722729694756 |
| NP_775169 | 1.1004649409060847 |
| NP_775170 | 1.0975634807339805 |
| NP_775171 | -1                 |
| NP_775174 | -1                 |
| NP_775175 | -1                 |
| NP_775176 | 0.9753966382929057 |
| NP_775411 | -1                 |
| NP_775412 | -1                 |
| NP_775413 | -1                 |
| NP_775414 | -1                 |
| NP_775415 | -1                 |
| NP_775416 | -1                 |
| NP_775417 | -1                 |
| NP_775418 | -1                 |
| NP_775419 | -1                 |
| NP_775420 | -1                 |
| NP_775421 | -1                 |
| NP_775422 | 1.4599275748724463 |
| NP_775423 | -1                 |
| NP_775425 | 1.1665913809249207 |
| NP_775426 | -1                 |
| NP_775427 | -1                 |
| NP_775435 | -1                 |
| NP_775436 | 0.7141886224404755 |
| NP_775437 | -1                 |
| NP_775438 | 0.8472515445625609 |
| NP_775439 | -1                 |
| NP_775440 | -1                 |
| NP_775441 | -1                 |
| NP_775442 | 1.0822005066206135 |
| NP_775443 | -1                 |
| NP_775444 | 0.9407692681634555 |
| NP_775445 | 1.034706754818141  |
| NP_775446 | 1.1003916170173307 |
| NP_775447 | 1.287711038325256  |

|           |                    |
|-----------|--------------------|
| NP_775448 | -1                 |
| NP_775449 | 1.1963537394414454 |
| NP_775450 | 0.5483191529787437 |
| NP_775451 | -1                 |
| NP_775452 | 1.1243234537312345 |
| NP_775453 | -1                 |
| NP_775455 | -1                 |
| NP_775456 | 1.118292232297406  |
| NP_775457 | -1                 |
| NP_775458 | -1                 |
| NP_775459 | -1                 |
| NP_775460 | 1.1252227819815324 |
| NP_775461 | -1                 |
| NP_776209 | 1.3181633676137634 |
| NP_776210 | 0.9534563660673285 |
| NP_777353 | 0.6856865135202573 |
| NP_783167 | 0.6695967929879627 |
| NP_783168 | -1                 |
| NP_783169 | 10.891197250589293 |
| NP_783170 | 0.8109346964092915 |
| NP_783171 | 1.2324753066213512 |
| NP_783172 | 6.225793321496957  |
| NP_783180 | -1                 |
| NP_783181 | 1.2454613430575052 |
| NP_783186 | 1.0605774645891384 |
| NP_783191 | 0.7827992063021987 |
| NP_783193 | 0.9700583564341286 |
| NP_783638 | 0.7697583016729987 |
| NP_783639 | 0.5864485479950098 |
| NP_786930 | 1.1249629775511953 |
| NP_786931 | 0.9356096288085893 |
| NP_786932 | 1.1752588184363697 |
| NP_786933 | 3.7819240406461474 |
| NP_786934 | 0.7250213430801846 |
| NP_786935 | -1                 |
| NP_786936 | -1                 |
| NP_786937 | 1.131963748479959  |
| NP_786938 | 1.4786529317184927 |
| NP_786939 | 1.3078840419247824 |
| NP_786940 | 1.1013343488139022 |
| NP_786942 | -1                 |
| NP_787037 | 1.2382756058208888 |
| NP_787038 | -1                 |
| NP_788264 | 0.9407377780858927 |
| NP_788265 | -1                 |
| NP_788266 | 0.9531131669497754 |
| NP_788267 | 0.9164059941478732 |
| NP_788268 | 0.8095969921461799 |
| NP_788269 | 0.769719566824056  |
| NP_789826 | 1.044717584274445  |
| NP_789827 | 1.0604979661686644 |
| NP_803154 | 0.99609023656502   |
| NP_803156 | 0.5030697717558049 |
| NP_803174 | 0.8251206351221945 |
| NP_803175 | 0.5271693871626097 |
| NP_803434 | 1.2561530012789    |
| NP_803435 | 1.138700863807044  |
| NP_808788 | 0.4431958889166454 |
| NP_808789 | 0.8517624016376134 |
| NP_808791 | 1.2194991331003417 |
| NP_808877 | 1.2040862695361207 |
| NP_821140 | 1.1103402476112891 |

|           |                     |
|-----------|---------------------|
| NP_835194 | 1.3076047774743804  |
| NP_835202 | 0.746388961621741   |
| NP_835205 | 0.8109925927928673  |
| NP_835280 | 0.7094167779413487  |
| NP_847900 | 1.0507669846944325  |
| NP_848017 | 0.9413975411358955  |
| NP_848035 | 1.0503225232461726  |
| NP_848036 | -1                  |
| NP_849178 | 1.96497416552173    |
| NP_849197 | 1.5446779542863525  |
| NP_851594 | 1.179236855019147   |
| NP_851596 | 1.6645928935449363  |
| NP_851597 | 1.1246185465430205  |
| NP_851602 | 0.7823231123840054  |
| NP_851604 | 0.9160625659341527  |
| NP_851605 | 0.6838835992564222  |
| NP_851606 | -1                  |
| NP_852027 | 1.063274395164552   |
| NP_852028 | 0.9146232938425977  |
| NP_852029 | 0.9041896018276336  |
| NP_852030 | 1.1840636991806586  |
| NP_852031 | 1.0657650951167763  |
| NP_852033 | 1.6996791454568123  |
| NP_852034 | -1                  |
| NP_852035 | 0.9238106942041211  |
| NP_852036 | 1.315070695942297   |
| NP_852038 | 1.11265355901439    |
| NP_852039 | 1.2494022639859506  |
| NP_852040 | 0.8596747540103165  |
| NP_852043 | 1.4877432562401822  |
| NP_852044 | 1.0185869110201795  |
| NP_852045 | 1.241016529016377   |
| NP_852046 | 0.8745733403550617  |
| NP_852053 | 1.0338470838936407  |
| NP_852098 | 0.36809033792176776 |
| NP_852105 | 1.7060757105298892  |
| NP_852140 | 19.76706793857007   |
| NP_852142 | 0.6893296872190005  |
| NP_852143 | 1.3462890721816176  |
| NP_853528 | 1.3869664035886569  |
| NP_853657 | 0.7768209337118691  |
| NP_853658 | 0.7786897266383956  |
| NP_853659 | 1.1673084832442857  |
| NP_853662 | 0.8814088590746744  |
| NP_853665 | -1                  |
| NP_853666 | 0.9941679399022421  |
| NP_853667 | 1.162978141760575   |
| NP_853668 | 1.0079685107980128  |
| NP_853669 | 2.030098326924446   |
| NP_853670 | 1.1318696186902908  |
| NP_859044 | -1                  |
| NP_859045 | 1.4086517721988738  |
| NP_861434 | -1                  |
| NP_861435 | 1.5264209694318878  |
| NP_861543 | 1.1983641585294844  |
| NP_861544 | 0.6306524132405503  |
| NP_872279 | 0.9998566515658877  |
| NP_872608 | 0.5867302584049685  |
| NP_872609 | 0.6194459386717621  |
| NP_872613 | 0.6503728360121693  |
| NP_872614 | 1.0524211602313067  |
| NP_872615 | 0.8759776240500377  |

|           |                    |
|-----------|--------------------|
| NP_877401 | -1                 |
| NP_877966 | 1.1685218182547812 |
| NP_877968 | 1.3916161259390087 |
| NP_877969 | 0.8330431339687211 |
| NP_877971 | 0.8073087525002886 |
| NP_878262 | 1.0749805018796905 |
| NP_878263 | 0.8467397084091965 |
| NP_878264 | 1.108058888879153  |
| NP_891994 | -1                 |
| NP_891996 | 1.2516480097684801 |
| NP_891999 | -1                 |
| NP_898874 | 1.8024501716444632 |
| NP_898876 | 1.1683702783320224 |
| NP_899154 | 1.2058713135693182 |
| NP_899157 | 0.9000184971201373 |
| NP_899158 | 0.6374181016718006 |
| NP_899159 | 1.6688970245142356 |
| NP_899162 | -1                 |
| NP_899652 | 1.2461174776174515 |
| NP_899653 | -1                 |
| NP_908937 | 1.0599086142344154 |
| NP_908938 | 0.7836960727740659 |
| NP_919443 | 1.8198682717009833 |
| NP_937764 | -1                 |
| NP_941958 | 0.9981353586704748 |
| NP_942023 | 0.8156806565804321 |
| NP_942024 | -1                 |
| NP_942025 | 1.0114503911420711 |
| NP_942027 | 1.028180789837564  |
| NP_942028 | 1.2170864065938443 |
| NP_942030 | 1.0354644009792437 |
| NP_942031 | 1.3819317910977782 |
| NP_942032 | 1.6031513460550748 |
| NP_942035 | 1.475155372078554  |
| NP_942036 | 1.3756444791294917 |
| NP_942037 | 0.7948940092074454 |
| NP_942039 | 0.8574010353291324 |
| NP_942040 | 0.9030328578588401 |
| NP_942041 | 1.2917709598646903 |
| NP_942042 | 1.0405762295284837 |
| NP_942044 | -1                 |
| NP_942045 | -1                 |
| NP_942046 | 1.0528391886862412 |
| NP_942048 | 1.1338098992613654 |
| NP_942049 | -1                 |
| NP_942051 | 1.0829042346973368 |
| NP_942052 | 0.9195847900662631 |
| NP_942053 | 1.1178632974450275 |
| NP_942054 | -1                 |
| NP_942056 | 1.2058513577750472 |
| NP_942057 | 1.2242007246562205 |
| NP_942060 | 0.9017116861274213 |
| NP_942062 | 1.1700538920905585 |
| NP_942067 | 1.0671865100789446 |
| NP_942069 | 0.8447597567379789 |
| NP_942072 | 1.0779092356958009 |
| NP_942075 | 1.0886418627035808 |
| NP_942080 | 1.0702562615445457 |
| NP_942082 | 0.8160422811553922 |
| NP_942083 | 1.031158236154567  |
| NP_942084 | 0.9294648282022799 |
| NP_942085 | 0.6817238250854825 |

|           |                    |
|-----------|--------------------|
| NP_942086 | 1.2053221778048586 |
| NP_945323 | 1.1226372579005315 |
| NP_954512 | 1.2759105017805548 |
| NP_954513 | -1                 |
| NP_954515 | -1                 |
| NP_954516 | 1.0609505392426433 |
| NP_954517 | 1.0802516370465    |
| NP_954518 | -1                 |
| NP_954521 | 0.8252470048531914 |
| NP_954524 | 0.5074233844363307 |
| NP_954526 | 1.1075200184175997 |
| NP_954527 | 1.202310889663616  |
| NP_954528 | 1.1892671806026607 |
| NP_954530 | 0.9771951904186813 |
| NP_954531 | 1.0299535895810823 |
| NP_954533 | 1.129203776538493  |
| NP_954537 | 0.9342204898709113 |
| NP_954541 | 1.1876406101995556 |
| NP_954543 | 1.8888068489270344 |
| NP_954545 | 1.7400865550304676 |
| NP_954547 | 1.1728908938359008 |
| NP_954548 | 1.3691260385571287 |
| NP_954549 | 0.7688780195713009 |
| NP_954550 | 0.9953392754268112 |
| NP_954677 | 1.0233841628226905 |
| NP_954678 | -1                 |
| NP_954862 | 0.8823167710662294 |
| NP_954865 | 0.801102806543927  |
| NP_954887 | -1                 |
| NP_954889 | 1.2593800126484245 |
| NP_954891 | 1.160729326409317  |
| NP_955402 | 1.3925343188905461 |
| NP_955404 | 0.8900786942492563 |
| NP_955407 | 0.6356902800186398 |
| NP_955408 | 0.6476720827540773 |
| NP_955409 | 1.2896872728839304 |
| NP_955410 | 1.1353430142539274 |
| NP_955411 | 0.7451842218219823 |
| NP_955412 | 1.094743904669812  |
| NP_955413 | 0.7089244555241914 |
| NP_955415 | 0.9113319025652155 |
| NP_955416 | 0.9595219357848775 |
| NP_955417 | 1.0235605890239903 |
| NP_955418 | 1.1451147028287447 |
| NP_955419 | 1.2755566547242552 |
| NP_955420 | 0.8934852062481276 |
| NP_955423 | 1.0587021793236795 |
| NP_955424 | 0.9416102873059495 |
| NP_955425 | 1.0815719946650737 |
| NP_955427 | 0.839523385567481  |
| NP_955431 | 0.9339942912359398 |
| NP_955432 | 1.4735405331555083 |
| NP_955435 | 0.9756228793566183 |
| NP_955436 | 0.9515168512376344 |
| NP_955439 | 1.0841101218959093 |
| NP_955440 | 0.4681207406497652 |
| NP_955441 | 1.004690083545184  |
| NP_955442 | 0.8951089740323823 |
| NP_955444 | 1.5116093484322037 |
| NP_955750 | 0.863243516345234  |
| NP_955783 | 1.116226299146626  |
| NP_955786 | -1                 |

|           |                    |
|-----------|--------------------|
| NP_955789 | 0.8665490279801794 |
| NP_955790 | 1.0491716856000786 |
| NP_955792 | -1                 |
| NP_955796 | 1.0559269517084657 |
| NP_958427 | -1                 |
| NP_958429 | -1                 |
| NP_958818 | 1.0812075032064161 |
| NP_958819 | 1.1915800789098905 |
| NP_958820 | 0.8689205807118109 |
| NP_958821 | 0.856742485440714  |
| NP_958822 | -1                 |
| NP_958824 | 0.8909350567447153 |
| NP_963854 | 1.348709200531963  |
| NP_963856 | -1                 |
| NP_973718 | 0.8844858489983828 |
| NP_976070 | -1                 |
| NP_976078 | -1                 |
| NP_976079 | -1                 |
| NP_976080 | 0.77925843088307   |
| NP_976242 | 1.1872193513296243 |
| NP_981955 | 0.8501225985895785 |
| NP_996538 | 0.8553862018923407 |
| NP_996732 | -1                 |
| NP_997469 | 1.1144059582492514 |
| NP_997471 | 1.23642762756792   |
| NP_997472 | 0.6485259097220865 |
| NP_997474 | 1.1216772545191127 |
| NP_997475 | 0.8036737183167105 |
| NP_997476 | -1                 |
| NP_997477 | 0.7867405916826278 |
| NP_997478 | 1.1847855376905994 |
| NP_997480 | -1                 |
| NP_997481 | 1.154168675208891  |
| NP_997484 | 1.148417765546397  |
| NP_997486 | 1.9565098306714905 |
| NP_997487 | 1.1758091098859849 |
| NP_997490 | 0.9295406417644604 |
| NP_997491 | 1.3656134718132247 |
| NP_997492 | -1                 |
| NP_997496 | 1.2089901030510182 |
| NP_997624 | 1.395587143278558  |
| NP_997627 | 1.3429138703635608 |
| NP_997628 | 1.082204724271776  |
| NP_997631 | -1                 |
| NP_997653 | -1                 |
| NP_997656 | 1.1491211489950617 |
| NP_997659 | 1.1144541469173843 |
| NP_997660 | 1.577230238761721  |
| NP_997661 | 1.2365245868427583 |
| NP_997665 | 1.1176013984830255 |
| NP_997666 | 0.9701849284215648 |
| NP_997669 | 2.30260783306833   |
| NP_997670 | 1.6446561498572512 |
| NP_997671 | 1.0812325473258075 |
| NP_997675 | 1.0892341260216847 |
| NP_997676 | 1.0460300098801656 |
| NP_997679 | 0.9760038875166175 |
| NP_997680 | 0.9578217417664937 |
| NP_997681 | 0.8778247706343176 |
| NP_997682 | 0.7746799026235056 |
| NP_997686 | -1                 |
| NP_997690 | 1.5958732681588994 |

|           |                    |
|-----------|--------------------|
| NP_997696 | 1.138227457029501  |
| NP_997697 | 0.7736585580063163 |
| NP_997699 | 1.4206544174906774 |
| NP_997703 | 2.192802413058508  |
| NP_997706 | -1                 |
| NP_997711 | -1                 |
| NP_997713 | 1.1814446429014713 |
| NP_997714 | 1.2599044925680671 |
| NP_998722 | 1.1359496928445931 |
| NP_998724 | 1.2785587228286586 |
| NP_998730 | 0.7144480557165478 |
| NP_998732 | 1.0814658651987938 |
| NP_998775 | 2.1073975329388595 |
| NP_998790 | 1.0956378666668962 |
| XP_212687 | 1.1172298771061024 |
| XP_212689 | 1.0790042565899325 |
| XP_212748 | 1.0920247228172602 |
| XP_212806 | -1                 |
| XP_212873 | 0.9562931029203451 |
| XP_212882 | 1.0227856148092742 |
| XP_212936 | -1                 |
| XP_212940 | 1.0312019960999201 |
| XP_212972 | 1.2859844866191235 |
| XP_213006 | 1.1388952189840813 |
| XP_213050 | 1.0948624118452752 |
| XP_213053 | 1.1572212856534236 |
| XP_213072 | -1                 |
| XP_213105 | 1.1260187695152353 |
| XP_213108 | 1.1733897033910476 |
| XP_213132 | 1.2194498793831494 |
| XP_213170 | 1.3319805428438072 |
| XP_213196 | 0.9876530371149591 |
| XP_213205 | 0.8508174239327264 |
| XP_213211 | 1.0678799713227696 |
| XP_213213 | 1.0893198713323782 |
| XP_213214 | 0.763549123112397  |
| XP_213215 | 0.7824945280647225 |
| XP_213217 | 1.018756514754219  |
| XP_213218 | 1.1315927540822919 |
| XP_213222 | 1.5187016542566532 |
| XP_213228 | 1.004172732133331  |
| XP_213230 | 0.9297002064391333 |
| XP_213231 | -1                 |
| XP_213234 | 0.6981046463298949 |
| XP_213235 | 0.9171564961457678 |
| XP_213237 | 0.8351138057541618 |
| XP_213239 | 0.8887474572384318 |
| XP_213240 | 0.7363555467350779 |
| XP_213242 | 0.831160510231454  |
| XP_213244 | 0.9722141699050572 |
| XP_213250 | 0.9135819368671289 |
| XP_213253 | -1                 |
| XP_213257 | -1                 |
| XP_213261 | 0.7246770942170114 |
| XP_213263 | -1                 |
| XP_213267 | 1.0387903204676752 |
| XP_213270 | 0.9891154735966813 |
| XP_213271 | 1.053698959997898  |
| XP_213273 | -1                 |
| XP_213276 | 0.871508094904342  |
| XP_213280 | -1                 |
| XP_213283 | 1.1466130224800999 |

|           |                    |
|-----------|--------------------|
| XP_213287 | 1.0878588904590853 |
| XP_213293 | 0.8899076804884295 |
| XP_213295 | 0.9975831830619981 |
| XP_213307 | 0.8550410960973176 |
| XP_213308 | 0.3815205047055308 |
| XP_213314 | 0.603141566868655  |
| XP_213318 | 0.3324272270661444 |
| XP_213321 | 0.8544461830293816 |
| XP_213324 | 0.6923781232638849 |
| XP_213328 | 0.7784017147760532 |
| XP_213329 | 1.2401168770250224 |
| XP_213330 | 1.0036241803838493 |
| XP_213333 | 1.1331409738399016 |
| XP_213334 | 1.1368826467662905 |
| XP_213336 | 1.2039348018847633 |
| XP_213338 | -1                 |
| XP_213342 | 0.9262795495146422 |
| XP_213343 | 1.188477105168748  |
| XP_213345 | 0.4241949459039243 |
| XP_213346 | 1.0699807840482487 |
| XP_213347 | 0.6682791914442459 |
| XP_213354 | 1.1282729235340423 |
| XP_213357 | 0.8666091464376562 |
| XP_213362 | 1.1532766873913802 |
| XP_213365 | 1.1882571528904848 |
| XP_213367 | 0.6927926937633703 |
| XP_213368 | 0.917778475635164  |
| XP_213369 | 1.043957722321731  |
| XP_213370 | 1.0772193411067243 |
| XP_213372 | 1.9484478773171026 |
| XP_213376 | 1.239896568962723  |
| XP_213377 | 0.9320431672982198 |
| XP_213382 | 0.8893611915225704 |
| XP_213385 | 1.0762803016751084 |
| XP_213394 | 0.8719803120028428 |
| XP_213395 | 1.175382246586068  |
| XP_213396 | 0.9233572190343826 |
| XP_213403 | 1.0217698295584003 |
| XP_213406 | 0.6989439341027267 |
| XP_213407 | 1.113883240413331  |
| XP_213410 | 1.0081694946161648 |
| XP_213411 | 0.9157961224778178 |
| XP_213413 | 0.6839403338531382 |
| XP_213415 | 1.021325503575512  |
| XP_213416 | 1.6059589321057623 |
| XP_213418 | 1.100979939276307  |
| XP_213421 | 1.6733237794410447 |
| XP_213423 | 1.1115305779542355 |
| XP_213426 | 1.329101759639851  |
| XP_213427 | 0.9657410275939582 |
| XP_213429 | -1                 |
| XP_213430 | 1.2764500410833417 |
| XP_213433 | -1                 |
| XP_213437 | 1.128469376587135  |
| XP_213439 | 0.796108190018344  |
| XP_213440 | 0.7089064486689733 |
| XP_213443 | 0.7936397277824744 |
| XP_213445 | 0.9831537081561667 |
| XP_213446 | 0.7844914421187871 |
| XP_213447 | 0.7770623256929413 |
| XP_213456 | 1.252840691204387  |
| XP_213459 | 1.0642438927830902 |



|           |                    |
|-----------|--------------------|
| XP_213461 | 1.242041168812686  |
| XP_213463 | 1.1018225390872967 |
| XP_213465 | 0.878474142062005  |
| XP_213467 | 1.0711323115585467 |
| XP_213468 | -1                 |
| XP_213469 | 1.1545352346822872 |
| XP_213483 | 1.1149136867452676 |
| XP_213484 | -1                 |
| XP_213487 | 1.1041145130691195 |
| XP_213488 | -1                 |
| XP_213491 | -1                 |
| XP_213492 | 1.1482054136178599 |
| XP_213493 | 0.7890267707931293 |
| XP_213506 | 1.2569287671404898 |
| XP_213508 | 1.3015539965912304 |
| XP_213509 | -1                 |
| XP_213511 | 1.2479413620607478 |
| XP_213513 | 0.8022229667754766 |
| XP_213514 | 1.6342349082602403 |
| XP_213516 | 0.9685104270103384 |
| XP_213518 | 1.577110705819545  |
| XP_213526 | 0.9529675026217466 |
| XP_213532 | -1                 |
| XP_213534 | 1.173313025185557  |
| XP_213535 | -1                 |
| XP_213539 | 1.4358373229025634 |
| XP_213542 | 0.9653528248876597 |
| XP_213560 | 1.2332758755660556 |
| XP_213564 | 0.960822262400613  |
| XP_213567 | 0.4100081628886159 |
| XP_213569 | 0.9188101830267026 |
| XP_213573 | 1.1030696045550643 |
| XP_213574 | 0.741750826162812  |
| XP_213578 | 0.7517195314595589 |
| XP_213581 | 0.9887168452228674 |
| XP_213584 | -1                 |
| XP_213585 | 0.7700330461421906 |
| XP_213586 | 1.0244750741237263 |
| XP_213598 | 1.0045129593188646 |
| XP_213600 | 2.391573629333126  |
| XP_213602 | 0.6630532733354972 |
| XP_213604 | 0.9386234293419222 |
| XP_213608 | 0.9008086787036949 |
| XP_213610 | 0.7866323547695354 |
| XP_213612 | 1.1997940279489876 |
| XP_213618 | 0.796779571689784  |
| XP_213619 | 0.9118056177091383 |
| XP_213621 | -1                 |
| XP_213633 | -1                 |
| XP_213637 | 0.7184386092836627 |
| XP_213638 | 0.8844600354609513 |
| XP_213639 | 1.0779086399411177 |
| XP_213645 | 0.7643889045527965 |
| XP_213649 | 0.8486104198942922 |
| XP_213650 | 1.1238906066278627 |
| XP_213651 | 0.7680887955554554 |
| XP_213656 | 0.987726605506213  |
| XP_213658 | 1.0339382912291468 |
| XP_213664 | 1.0967777544120578 |
| XP_213670 | 0.6362404336204944 |
| XP_213672 | 1.502016521944725  |
| XP_213677 | 0.6429269352078841 |

|           |                    |
|-----------|--------------------|
| XP_213679 | 1.2786092727495666 |
| XP_213684 | 0.9790606186947224 |
| XP_213685 | 0.9484206439615467 |
| XP_213690 | 0.8181386439403678 |
| XP_213692 | 1.005009104104121  |
| XP_213700 | 0.8577036786477823 |
| XP_213701 | 1.2842990023164103 |
| XP_213702 | 1.098701221843535  |
| XP_213706 | 0.9857433035149513 |
| XP_213710 | 0.9739787428204466 |
| XP_213712 | 1.2074905960742675 |
| XP_213713 | 1.042712006503751  |
| XP_213716 | 0.6294730535577633 |
| XP_213717 | 1.0595755707848549 |
| XP_213719 | 1.1106556625645996 |
| XP_213723 | 1.4186328683294143 |
| XP_213725 | 1.1776504745234442 |
| XP_213726 | 0.873340927156594  |
| XP_213727 | 2.1164531363811365 |
| XP_213729 | 1.4085802134587093 |
| XP_213733 | 0.868604025339006  |
| XP_213736 | 1.2893321922591987 |
| XP_213738 | 0.7544042074558462 |
| XP_213742 | 0.5346427977558738 |
| XP_213746 | 0.7090385794723884 |
| XP_213751 | 1.6515819284249302 |
| XP_213758 | 1.0274346255650646 |
| XP_213761 | -1                 |
| XP_213762 | 0.5891933405725343 |
| XP_213765 | 1.2374560698003234 |
| XP_213769 | 1.2853124967777678 |
| XP_213773 | 1.1738937776019138 |
| XP_213774 | 0.871565467773939  |
| XP_213777 | 1.3503730740714988 |
| XP_213779 | 0.9709242846355589 |
| XP_213782 | 0.9101007018397681 |
| XP_213783 | 0.8810846187392963 |
| XP_213790 | 0.8054341861549733 |
| XP_213791 | 0.3843014447270839 |
| XP_213793 | 0.8546735382133308 |
| XP_213794 | 0.819783676433405  |
| XP_213797 | 1.1528555942625256 |
| XP_213799 | 1.0263344536063796 |
| XP_213800 | 1.152837818061451  |
| XP_213807 | 1.0249258934019398 |
| XP_213811 | 0.9955445566030874 |
| XP_213821 | 0.9113470763134223 |
| XP_213823 | 0.8643211385311792 |
| XP_213824 | 1.1912477914601818 |
| XP_213831 | 4.218038471435644  |
| XP_213832 | 0.9079836118133033 |
| XP_213833 | 0.6937884123057406 |
| XP_213835 | 1.0449953830702197 |
| XP_213840 | 0.9963585333409964 |
| XP_213841 | 0.9645680792193262 |
| XP_213842 | 0.7711774194396459 |
| XP_213843 | 0.9204906674783446 |
| XP_213844 | 1.152237464337205  |
| XP_213848 | 0.9844078889289518 |
| XP_213849 | 1.1143754607218908 |
| XP_213876 | 0.4834293557462523 |
| XP_213879 | 1.5202041044929657 |

|           |                     |
|-----------|---------------------|
| XP_213886 | 1.007057015600237   |
| XP_213890 | 0.8309519707130498  |
| XP_213893 | -1                  |
| XP_213895 | 0.7336467422599199  |
| XP_213896 | 1.1383827224738043  |
| XP_213898 | 0.6701421356897218  |
| XP_213900 | 1.0174646271024277  |
| XP_213902 | 1.5230142321667082  |
| XP_213903 | 0.8848066737727142  |
| XP_213907 | 1.1508188699011388  |
| XP_213910 | -1                  |
| XP_213912 | 1.0643816233318644  |
| XP_213919 | 1.4083871921449447  |
| XP_213920 | 0.817746979260027   |
| XP_213921 | 1.6744254918089017  |
| XP_213922 | 0.6188122948195468  |
| XP_213925 | 1.0527498214042466  |
| XP_213926 | 0.9321897795531408  |
| XP_213927 | 1.0483930299545474  |
| XP_213930 | 0.9959356006353297  |
| XP_213936 | 0.9056553166175196  |
| XP_213940 | 0.8089254186775984  |
| XP_213943 | 1.039581556692321   |
| XP_213944 | 0.5860480595700808  |
| XP_213949 | 0.9208041207128695  |
| XP_213950 | 1.095788448611806   |
| XP_213951 | 0.8850176699264516  |
| XP_213954 | 0.7150037926012952  |
| XP_213960 | 0.8871375501993984  |
| XP_213963 | 0.7490967398379795  |
| XP_213964 | 1.0162058558261755  |
| XP_213967 | 0.937595125150235   |
| XP_213969 | 0.9327581263680719  |
| XP_213972 | 0.755548439619011   |
| XP_213976 | 1.0853984362214186  |
| XP_213979 | 1.940080209533661   |
| XP_213982 | 0.7400887930411594  |
| XP_213983 | 0.738732982757638   |
| XP_213984 | 1.1012500128748992  |
| XP_213992 | 1.0867006530538061  |
| XP_213995 | 1.5165486363151819  |
| XP_213997 | 0.19578746365746783 |
| XP_213999 | -1                  |
| XP_214001 | 1.0940308687112263  |
| XP_214004 | 0.7354884441494659  |
| XP_214006 | 1.2385058172343466  |
| XP_214007 | 0.997205223427399   |
| XP_214008 | 1.1253298547002901  |
| XP_214011 | 1.2316047706986681  |
| XP_214012 | 1.1639968753865813  |
| XP_214013 | 1.282175914605258   |
| XP_214014 | 1.0766998628246798  |
| XP_214017 | 1.2480711491159355  |
| XP_214021 | 1.0792155222660773  |
| XP_214030 | 1.4647668836625864  |
| XP_214031 | 0.4382501513605546  |
| XP_214035 | 1.4844992004186164  |
| XP_214042 | 1.3945104171861509  |
| XP_214043 | 1.1518043579241715  |
| XP_214047 | 0.7363451216013336  |
| XP_214048 | 1.0828403056513005  |
| XP_214050 | 1.3029260293483513  |

|           |                    |
|-----------|--------------------|
| XP_214053 | 1.5243793963770442 |
| XP_214059 | 0.9144607707818705 |
| XP_214061 | 0.9711657412561049 |
| XP_214063 | 0.9534450358507733 |
| XP_214067 | 0.8538511511595394 |
| XP_214069 | 0.9892819551581415 |
| XP_214071 | 0.9030529512260695 |
| XP_214072 | -1                 |
| XP_214074 | -1                 |
| XP_214078 | 0.9797689911853248 |
| XP_214079 | 1.1849027756474055 |
| XP_214085 | -1                 |
| XP_214087 | 0.7599569971615786 |
| XP_214090 | 1.070755990416891  |
| XP_214092 | 1.0016963833611388 |
| XP_214093 | 1.1378560306265555 |
| XP_214096 | 0.9671843178383331 |
| XP_214099 | 1.0203559490914518 |
| XP_214102 | -1                 |
| XP_214108 | 1.149602158738188  |
| XP_214110 | 1.3307913681464099 |
| XP_214120 | 1.4787175067406455 |
| XP_214121 | 1.0158106049796052 |
| XP_214130 | 1.250262304423371  |
| XP_214132 | 0.7996638655659559 |
| XP_214137 | 0.8425005162022533 |
| XP_214148 | 1.0247008097489487 |
| XP_214152 | 1.4426893031947328 |
| XP_214153 | 1.0154450836634141 |
| XP_214155 | 0.9610718111801968 |
| XP_214157 | 0.8519134416593076 |
| XP_214160 | 1.1415554111259603 |
| XP_214163 | 0.8513031998656803 |
| XP_214169 | 1.0694834987085216 |
| XP_214173 | 0.9174253680102757 |
| XP_214175 | 1.0813434883841253 |
| XP_214181 | 0.8202491142611281 |
| XP_214182 | 0.9220600768561448 |
| XP_214185 | 0.6806928937915119 |
| XP_214189 | -1                 |
| XP_214196 | 2.0494166148888735 |
| XP_214197 | 0.8877270099791884 |
| XP_214199 | 0.8311250022618828 |
| XP_214202 | 0.870513945881311  |
| XP_214203 | 1.0006726020590206 |
| XP_214211 | -1                 |
| XP_214213 | 0.8477780832952879 |
| XP_214215 | 1.2140945942643433 |
| XP_214216 | 1.7533680151778273 |
| XP_214217 | -1                 |
| XP_214221 | 0.7495308348391004 |
| XP_214234 | 0.9619566861389472 |
| XP_214237 | 1.0600505492424082 |
| XP_214238 | 0.6957991580710491 |
| XP_214241 | 0.775277396964249  |
| XP_214242 | 0.833622518540814  |
| XP_214245 | 0.9686497864194195 |
| XP_214250 | 0.8798052902148633 |
| XP_214253 | 1.130064247368954  |
| XP_214258 | 1.1373352887687425 |
| XP_214266 | 0.6463264810434496 |
| XP_214273 | 1.2075444533066508 |

|           |                    |
|-----------|--------------------|
| XP_214276 | 0.8797967492523089 |
| XP_214278 | -1                 |
| XP_214279 | 2.4698068701484908 |
| XP_214284 | 0.9779158034453591 |
| XP_214288 | 0.9402674407251381 |
| XP_214290 | 0.7317034090676598 |
| XP_214293 | 0.8233120034473814 |
| XP_214295 | 0.5268961939626889 |
| XP_214296 | 0.5391138612580296 |
| XP_214298 | 1.1482310367168291 |
| XP_214300 | 0.9055057415556916 |
| XP_214304 | 0.7693911630388309 |
| XP_214305 | 0.6442593504775583 |
| XP_214306 | 1.1181700844041609 |
| XP_214307 | 0.8326909154619629 |
| XP_214309 | 0.6386799261968913 |
| XP_214310 | 1.2040038469620595 |
| XP_214312 | 1.17486862019367   |
| XP_214313 | 1.2551514066215328 |
| XP_214316 | 0.7490623950740701 |
| XP_214317 | 1.0172353999420667 |
| XP_214318 | 0.7681831335012873 |
| XP_214319 | -1                 |
| XP_214320 | 0.9498205864885184 |
| XP_214321 | 0.724993871761807  |
| XP_214322 | 1.3251466902076554 |
| XP_214331 | -1                 |
| XP_214332 | 0.819586689827155  |
| XP_214334 | 0.7379132294031691 |
| XP_214338 | 0.9752920816028489 |
| XP_214339 | 0.8446748705389338 |
| XP_214349 | 0.8201573966817244 |
| XP_214350 | 1.5247636063625625 |
| XP_214353 | 0.8754134249854914 |
| XP_214355 | 0.3456610861308667 |
| XP_214362 | 0.9979395171231454 |
| XP_214365 | 1.1482494922689621 |
| XP_214366 | 1.0530867954023453 |
| XP_214369 | 1.8543976360985341 |
| XP_214372 | 1.2620397496435707 |
| XP_214374 | 1.2693719152086738 |
| XP_214377 | 0.9858436003667522 |
| XP_214380 | 1.5950084913319562 |
| XP_214381 | 1.2929536227711542 |
| XP_214382 | 0.8992268761387131 |
| XP_214383 | 1.386690825965036  |
| XP_214386 | -1                 |
| XP_214392 | 1.2260377641465057 |
| XP_214393 | 0.8099911248605971 |
| XP_214400 | 0.6556769968150816 |
| XP_214403 | 0.7047748066622126 |
| XP_214404 | 1.1984357565294639 |
| XP_214412 | -1                 |
| XP_214413 | -1                 |
| XP_214416 | 0.6416187742343467 |
| XP_214417 | 0.8283991172178823 |
| XP_214420 | 1.6782650878252685 |
| XP_214423 | 1.1342948381803628 |
| XP_214427 | 1.1514736093817666 |
| XP_214428 | 0.8662143182366798 |
| XP_214431 | 0.9141083960576988 |
| XP_214433 | 0.8899713290370822 |

|           |                     |
|-----------|---------------------|
| XP_214434 | 1.1323200100083433  |
| XP_214440 | 1.9194393428144005  |
| XP_214441 | 0.28613102552284664 |
| XP_214443 | 1.89808045370572    |
| XP_214446 | -1                  |
| XP_214448 | 1.042224070018327   |
| XP_214451 | 0.8959911735079423  |
| XP_214454 | -1                  |
| XP_214459 | 1.0789934427067298  |
| XP_214460 | 1.2870401077933196  |
| XP_214469 | 15.519859993501683  |
| XP_214475 | 1.0360708497865725  |
| XP_214478 | 1.0865982979004294  |
| XP_214485 | 0.9952526340132967  |
| XP_214491 | 0.8024419241445804  |
| XP_214499 | 0.9704541803972027  |
| XP_214505 | 0.8697158437751308  |
| XP_214514 | 0.986319698223666   |
| XP_214518 | 0.9843166426438977  |
| XP_214522 | 1.05989737308939    |
| XP_214524 | 0.9347387880651266  |
| XP_214525 | 1.0416028644058437  |
| XP_214526 | 0.9495449321625467  |
| XP_214528 | 0.9019641088567664  |
| XP_214529 | 0.9475090912953178  |
| XP_214535 | 0.9425840764154895  |
| XP_214539 | 0.9185186767201641  |
| XP_214541 | 0.7905550465580671  |
| XP_214550 | 0.9547024763932795  |
| XP_214551 | 1.1077218441734826  |
| XP_214552 | 1.0229100616727316  |
| XP_214553 | 1.1753054095870683  |
| XP_214554 | 0.7940927251077726  |
| XP_214557 | 0.778021096151143   |
| XP_214564 | 0.930957399559695   |
| XP_214566 | 0.8286650685207079  |
| XP_214569 | -1                  |
| XP_214570 | 0.5046170551184752  |
| XP_214574 | 0.9353255314639438  |
| XP_214583 | 1.012355927279943   |
| XP_214584 | 0.8919038157104171  |
| XP_214590 | 0.9768072323156652  |
| XP_214596 | 1.4799278110753329  |
| XP_214599 | 0.7257653668975729  |
| XP_214601 | 0.8537312665840303  |
| XP_214605 | 1.07045232080723    |
| XP_214614 | 0.8492523888309691  |
| XP_214617 | 1.1987750842382505  |
| XP_214622 | 0.8991349421462703  |
| XP_214625 | 0.926217624293553   |
| XP_214626 | 0.9915264910200916  |
| XP_214630 | 0.8107024481342363  |
| XP_214633 | 0.14873770979384957 |
| XP_214635 | 1.0704162807264466  |
| XP_214639 | 0.8534584107347497  |
| XP_214640 | 0.8224204032583845  |
| XP_214646 | 1.0961164982830014  |
| XP_214655 | 0.8273200117498801  |
| XP_214656 | 0.9232040342620156  |
| XP_214659 | 1.4002463737801618  |
| XP_214662 | 1.3133348594407392  |
| XP_214663 | 1.0787155705771347  |

|           |                     |
|-----------|---------------------|
| XP_214664 | 0.8036796096324847  |
| XP_214665 | 1.1267245575310267  |
| XP_214666 | 0.8756098297246092  |
| XP_214667 | 0.8510685522303305  |
| XP_214668 | 0.9331696198179055  |
| XP_214669 | 1.492987017450209   |
| XP_214671 | 1.0951128775219288  |
| XP_214672 | 0.9298203333149657  |
| XP_214673 | 0.9102275074418428  |
| XP_214677 | -1                  |
| XP_214678 | 1.7916955181115732  |
| XP_214687 | 0.8747593310464118  |
| XP_214688 | -1                  |
| XP_214690 | 1.1465830601113813  |
| XP_214697 | 1.0194510784950932  |
| XP_214698 | 1.3067206664418038  |
| XP_214702 | 1.0106081425809963  |
| XP_214703 | 0.9392863799484861  |
| XP_214704 | 0.8879300768442526  |
| XP_214707 | 1.1580644111745286  |
| XP_214712 | 0.49525192575779275 |
| XP_214713 | 1.2271854866110201  |
| XP_214715 | 0.8259681549543569  |
| XP_214721 | 0.8613777443224904  |
| XP_214730 | 0.9474044865480508  |
| XP_214735 | 1.1055662897726402  |
| XP_214737 | 1.2768298119686463  |
| XP_214744 | 0.6985495141862531  |
| XP_214749 | 0.9109401647549453  |
| XP_214751 | 1.0286477345949787  |
| XP_214757 | 0.9282689620109134  |
| XP_214769 | 1.0245001904438993  |
| XP_214774 | 1.0697866355579515  |
| XP_214778 | 0.7370537926101183  |
| XP_214780 | 1.0517153182458552  |
| XP_214790 | 1.7258367634194982  |
| XP_214797 | 1.0027413254252728  |
| XP_214798 | 1.6942639361562033  |
| XP_214805 | 1.2693422006814297  |
| XP_214806 | 1.1968344449267156  |
| XP_214811 | 1.2086951683157128  |
| XP_214812 | 1.1826914563739954  |
| XP_214813 | 1.999773656013999   |
| XP_214817 | 1.3560522394309371  |
| XP_214819 | 0.862608625373508   |
| XP_214825 | 1.0960475762723279  |
| XP_214831 | 0.7953382929947918  |
| XP_214833 | 1.468222786597383   |
| XP_214834 | 0.8616269764621683  |
| XP_214835 | 1.2743630353705273  |
| XP_214836 | 0.933327518307086   |
| XP_214838 | 1.2805918467276731  |
| XP_214840 | -1                  |
| XP_214842 | 1.0378512979122714  |
| XP_214843 | 0.8656358055387537  |
| XP_214845 | 1.0926945469951586  |
| XP_214847 | 0.7128752049688649  |
| XP_214853 | -1                  |
| XP_214859 | 1.1724376245822885  |
| XP_214862 | 0.9980771430838197  |
| XP_214863 | 0.9655927618603637  |
| XP_214868 | 0.8089623767068131  |

|           |                    |
|-----------|--------------------|
| XP_214873 | 1.0998147187674772 |
| XP_214874 | 1.1229147364387455 |
| XP_214875 | 1.1207136932973485 |
| XP_214878 | 1.0032101009408345 |
| XP_214883 | -1                 |
| XP_214886 | 0.9169125389012059 |
| XP_214888 | 0.8766614748285205 |
| XP_214890 | 0.8581140045115592 |
| XP_214895 | 0.9720644180402629 |
| XP_214896 | 1.0737792599382476 |
| XP_214897 | 0.6504669651183931 |
| XP_214898 | 1.4945434531913422 |
| XP_214899 | 1.0826509744686874 |
| XP_214902 | 1.0587560897176977 |
| XP_214906 | -1                 |
| XP_214907 | 0.8801522412757291 |
| XP_214910 | 1.060190065553714  |
| XP_214911 | 0.9981692075554083 |
| XP_214912 | 1.3433536461855153 |
| XP_214914 | 1.040064171701276  |
| XP_214916 | 1.0034129380722816 |
| XP_214924 | 1.1645733303229773 |
| XP_214925 | 0.9745876302867024 |
| XP_214926 | 1.1300991987750235 |
| XP_214927 | 1.1391090717884576 |
| XP_214929 | 0.5139518346937907 |
| XP_214931 | -1                 |
| XP_214935 | -1                 |
| XP_214939 | 1.5529610107262706 |
| XP_214940 | 2.3865435595603612 |
| XP_214945 | -1                 |
| XP_214948 | 0.9345849976807105 |
| XP_214950 | 1.0600245394890433 |
| XP_214951 | 1.025196281004075  |
| XP_214953 | -1                 |
| XP_214954 | 0.8260036554163701 |
| XP_214962 | 1.1372223927887235 |
| XP_214963 | 0.8510608484666199 |
| XP_214967 | 0.9234374928458946 |
| XP_214969 | 1.36227968669906   |
| XP_214972 | 1.1493844933959079 |
| XP_214973 | 1.3416720257310326 |
| XP_214975 | 1.4757230708786861 |
| XP_214979 | 2.007664502188496  |
| XP_214980 | 1.091755272218356  |
| XP_214982 | 1.2356615188129385 |
| XP_214983 | 1.2715462626357246 |
| XP_214986 | 1.4302281064151448 |
| XP_214991 | 1.2198091991800286 |
| XP_214992 | 2.3875211878673155 |
| XP_214993 | -1                 |
| XP_214994 | 1.203394760400056  |
| XP_214995 | 1.0911033644107888 |
| XP_214996 | 1.1165247186198974 |
| XP_214998 | 0.9881584782228044 |
| XP_215000 | 1.8019012849316942 |
| XP_215001 | 0.9594095483901026 |
| XP_215003 | 1.0680440186839926 |
| XP_215005 | 3.146340265920138  |
| XP_215009 | 1.0427238168299031 |
| XP_215011 | 1.3545810301824002 |
| XP_215012 | 0.8337619040409193 |



|           |                    |
|-----------|--------------------|
| XP_215013 | 1.1633338768829862 |
| XP_215016 | 1.155732324258441  |
| XP_215023 | 1.195408447998837  |
| XP_215026 | 1.4676948201498892 |
| XP_215027 | 0.7858864657076364 |
| XP_215028 | 1.0400207411124878 |
| XP_215033 | 0.9251711103463642 |
| XP_215034 | 0.8120000292278563 |
| XP_215037 | 1.0223147609052894 |
| XP_215038 | 1.2615617705315392 |
| XP_215041 | 1.1311224193478557 |
| XP_215043 | -1                 |
| XP_215044 | 1.167236660087289  |
| XP_215045 | 0.9255145114133757 |
| XP_215046 | 0.7402379740519864 |
| XP_215047 | 1.2137336324565537 |
| XP_215054 | 2.50256576191259   |
| XP_215057 | 1.1519319982146172 |
| XP_215059 | -1                 |
| XP_215064 | 1.023848335969114  |
| XP_215069 | 0.9556508063635157 |
| XP_215070 | 1.7358800235432732 |
| XP_215071 | -1                 |
| XP_215074 | 1.1344966771589875 |
| XP_215075 | 0.9082106393268906 |
| XP_215076 | 0.9378675999101342 |
| XP_215080 | 1.1509407932442421 |
| XP_215089 | 1.153930127756917  |
| XP_215090 | 0.9158852199977788 |
| XP_215106 | -1                 |
| XP_215108 | 1.1161501102710587 |
| XP_215113 | 1.0100618211849124 |
| XP_215117 | 4.58198887976501   |
| XP_215121 | 0.8414165204150098 |
| XP_215123 | 1.060914135341087  |
| XP_215127 | 1.1011519769492741 |
| XP_215128 | 1.1542051016236494 |
| XP_215130 | -1                 |
| XP_215134 | 1.0000737446353638 |
| XP_215136 | 1.1736904034593068 |
| XP_215139 | 0.5817665124972079 |
| XP_215142 | 0.7763306039461031 |
| XP_215145 | 0.7639303431543092 |
| XP_215147 | 0.8817546957905944 |
| XP_215148 | 0.9006081654618943 |
| XP_215154 | 0.9896647541628282 |
| XP_215159 | 0.7956202867398058 |
| XP_215165 | 1.2746723872725823 |
| XP_215167 | 0.9648450931427138 |
| XP_215168 | 0.7993345468678309 |
| XP_215174 | 1.402189587553094  |
| XP_215177 | 1.1335452868877596 |
| XP_215178 | 0.8871144224747024 |
| XP_215180 | 0.9612846616835792 |
| XP_215182 | 1.1051776819381496 |
| XP_215185 | 1.0203416273346124 |
| XP_215186 | -1                 |
| XP_215190 | 0.8800376577133008 |
| XP_215192 | 1.1665364788040324 |
| XP_215195 | -1                 |
| XP_215196 | 1.216733190547286  |
| XP_215197 | 0.7955855166962497 |

|           |                     |
|-----------|---------------------|
| XP_215199 | 0.6202551640540853  |
| XP_215206 | 0.8170763011762053  |
| XP_215208 | 0.9924142415177938  |
| XP_215213 | 1.0446369095499057  |
| XP_215222 | 0.9354351222907095  |
| XP_215225 | 0.9733002710499866  |
| XP_215227 | 0.49998509131468877 |
| XP_215230 | -1                  |
| XP_215234 | -1                  |
| XP_215240 | -1                  |
| XP_215244 | -1                  |
| XP_215247 | 0.9992302148164957  |
| XP_215251 | 1.0142238530851977  |
| XP_215254 | 3.3360584097363097  |
| XP_215257 | -1                  |
| XP_215259 | 1.2209733460355117  |
| XP_215260 | 0.986506467460678   |
| XP_215262 | 0.8640500426086001  |
| XP_215264 | 0.6198707508261804  |
| XP_215270 | 1.4148237281394966  |
| XP_215273 | 1.0405363725688532  |
| XP_215278 | 0.7951194495133693  |
| XP_215285 | -1                  |
| XP_215286 | 1.2474802059598415  |
| XP_215293 | 1.7297081089138662  |
| XP_215296 | 1.2825605502897277  |
| XP_215303 | 1.7076813607937247  |
| XP_215320 | 0.8319573077572091  |
| XP_215323 | -1                  |
| XP_215324 | 0.972476983877843   |
| XP_215325 | 1.161542363373028   |
| XP_215327 | 1.321522077594125   |
| XP_215342 | 1.7874842957576156  |
| XP_215344 | 1.196638517325319   |
| XP_215351 | 2.2769778296057592  |
| XP_215355 | 1.9784413643177297  |
| XP_215356 | -1                  |
| XP_215357 | 1.7421032509943313  |
| XP_215358 | 0.9686359285014295  |
| XP_215359 | 0.7188216217532565  |
| XP_215362 | 1.1180388663284646  |
| XP_215367 | 1.2636505983127078  |
| XP_215373 | 1.1362901074451566  |
| XP_215375 | 0.8224594223518692  |
| XP_215376 | 1.0238711467540822  |
| XP_215378 | 0.9461552011959151  |
| XP_215386 | 0.8887763463892352  |
| XP_215389 | 1.1530797332658407  |
| XP_215390 | 1.0447868461383942  |
| XP_215393 | 1.1927354112690458  |
| XP_215397 | 0.962703127800402   |
| XP_215401 | 1.1742151002590875  |
| XP_215403 | 1.1976693165492942  |
| XP_215407 | 1.014651907791265   |
| XP_215413 | -1                  |
| XP_215416 | 0.9995930752840351  |
| XP_215419 | 1.064415551260535   |
| XP_215421 | -1                  |
| XP_215422 | 1.045926007115277   |
| XP_215424 | 1.2883711915759213  |
| XP_215432 | 1.227557161582418   |
| XP_215434 | 1.0306111126634792  |

|           |                      |
|-----------|----------------------|
| XP_215438 | 0.924992780967225    |
| XP_215439 | 0.7737662237191025   |
| XP_215445 | -1                   |
| XP_215451 | 1.1138188510213887   |
| XP_215452 | 1.0440556887401498   |
| XP_215455 | 1.1374699976610385   |
| XP_215465 | 0.9930822079806766   |
| XP_215467 | 0.6169844682984124   |
| XP_215468 | 1.0258400599177169   |
| XP_215469 | 1.1304348332861367   |
| XP_215475 | 0.9637202907084013   |
| XP_215481 | 1.1554727351446605   |
| XP_215482 | 0.9511774429929538   |
| XP_215483 | 1.1404962134186858   |
| XP_215485 | 1.1379067783458756   |
| XP_215486 | 0.7799010666873619   |
| XP_215487 | 1.077857962344459    |
| XP_215495 | 0.018444387943722086 |
| XP_215497 | 1.0358442385117      |
| XP_215501 | 1.0358485680861766   |
| XP_215503 | 1.2115299959772106   |
| XP_215504 | 0.9960972649215236   |
| XP_215505 | 1.2429947435972875   |
| XP_215510 | -1                   |
| XP_215512 | 1.0305794180692398   |
| XP_215513 | -1                   |
| XP_215515 | 1.24793526222624     |
| XP_215516 | 1.3529572492745359   |
| XP_215528 | 0.8543391075182933   |
| XP_215530 | 1.2848008280438414   |
| XP_215540 | 0.9376290152043739   |
| XP_215541 | 1.007056579292938    |
| XP_215544 | 0.6535078965158834   |
| XP_215550 | 1.0537927599626185   |
| XP_215551 | 0.4953872026232091   |
| XP_215553 | 0.8686807587863727   |
| XP_215554 | 0.7782524576279988   |
| XP_215562 | 1.6507083325534637   |
| XP_215564 | 1.1703146995852725   |
| XP_215566 | 1.0219522086587833   |
| XP_215570 | 1.8156308132069388   |
| XP_215573 | 1.5367651100760717   |
| XP_215575 | 1.171441933256824    |
| XP_215576 | 6.870689140042383    |
| XP_215578 | 0.8132139875580194   |
| XP_215579 | 1.6709293680905486   |
| XP_215594 | 0.9401861714212969   |
| XP_215597 | -1                   |
| XP_215598 | 1.155313148716923    |
| XP_215600 | 0.8369492021700798   |
| XP_215605 | -1                   |
| XP_215607 | 0.5631547833014579   |
| XP_215612 | 0.6962623865860281   |
| XP_215616 | 0.9241359351935702   |
| XP_215619 | 0.6298219278452538   |
| XP_215626 | 0.8371992732880077   |
| XP_215627 | 0.8159577527475697   |
| XP_215628 | 0.8246505880578047   |
| XP_215630 | 0.6926651071401464   |
| XP_215635 | 0.9604294038921429   |
| XP_215637 | 0.9625556208200184   |
| XP_215641 | 1.0435297321400359   |

|           |                     |
|-----------|---------------------|
| XP_215645 | 1.1198992565425683  |
| XP_215648 | 1.3922371376361713  |
| XP_215655 | 1.0535085007861678  |
| XP_215659 | 1.1369269061040153  |
| XP_215660 | -1                  |
| XP_215663 | 1.1951249976214968  |
| XP_215664 | 1.0749127813914459  |
| XP_215666 | 1.1031718933790908  |
| XP_215667 | 1.0376385501065328  |
| XP_215670 | 0.9317242568361038  |
| XP_215674 | 0.8770775882407488  |
| XP_215677 | 1.1513775590647082  |
| XP_215685 | 0.8513670332165404  |
| XP_215691 | 0.9695585946515198  |
| XP_215692 | -1                  |
| XP_215693 | 1.1906032667392912  |
| XP_215701 | 0.8771924010248715  |
| XP_215705 | 0.734999400202914   |
| XP_215706 | 1.166304103306855   |
| XP_215717 | 0.9317957265250278  |
| XP_215718 | 1.3633281576270708  |
| XP_215723 | 0.9838829746378684  |
| XP_215730 | 1.0263133400630584  |
| XP_215733 | 1.1547514488171804  |
| XP_215741 | 1.18065055474176    |
| XP_215742 | 1.3161400040624682  |
| XP_215747 | 1.1125377932376128  |
| XP_215749 | 1.176256772054836   |
| XP_215751 | -1                  |
| XP_215754 | 0.9399565950395873  |
| XP_215757 | 0.892757639685259   |
| XP_215762 | 0.45049890615780797 |
| XP_215767 | 1.0473296602813333  |
| XP_215769 | 0.9297593077990943  |
| XP_215771 | -1                  |
| XP_215776 | 1.2064091908433343  |
| XP_215777 | -1                  |
| XP_215781 | 1.0017931145257248  |
| XP_215783 | -1                  |
| XP_215785 | 0.9550202458925517  |
| XP_215787 | 0.916261034852233   |
| XP_215790 | 0.9239435609221843  |
| XP_215794 | 1.0701329680110587  |
| XP_215797 | 0.9112363769605212  |
| XP_215801 | 1.2321337974383222  |
| XP_215811 | 0.8651845127784106  |
| XP_215812 | 1.033919490527902   |
| XP_215821 | 1.24014207936849    |
| XP_215822 | 0.9700226071926329  |
| XP_215826 | 1.2818532184983251  |
| XP_215827 | 0.9348980570166601  |
| XP_215828 | 0.8359687097947924  |
| XP_215829 | 1.0786975736880078  |
| XP_215831 | 0.9246091191232869  |
| XP_215832 | 0.9141309056213225  |
| XP_215833 | 0.9412993175637541  |
| XP_215838 | 0.7964690036633547  |
| XP_215839 | 1.2275123587030732  |
| XP_215840 | 1.0423478662607752  |
| XP_215841 | 0.8542532178604435  |
| XP_215843 | 1.326211405100999   |
| XP_215847 | 1.403291416768054   |

|           |                    |
|-----------|--------------------|
| XP_215848 | 1.5427195288895117 |
| XP_215851 | 0.5716556584253035 |
| XP_215857 | 1.0214092175400593 |
| XP_215858 | 1.4130999081754334 |
| XP_215862 | 1.5567772815477934 |
| XP_215872 | 1.2804223785271285 |
| XP_215875 | 1.2327911871382224 |
| XP_215876 | -1                 |
| XP_215880 | 1.151671392098936  |
| XP_215883 | 1.3162515293502228 |
| XP_215885 | 1.1055866192059192 |
| XP_215894 | 0.9638657588033821 |
| XP_215896 | 0.7348322398858426 |
| XP_215897 | 0.9784443515233187 |
| XP_215903 | 1.425201761724403  |
| XP_215906 | 1.152887992149993  |
| XP_215908 | 0.9241656914454905 |
| XP_215919 | 0.6480050943425898 |
| XP_215920 | 1.17860346422332   |
| XP_215921 | 1.1428310101155794 |
| XP_215922 | 1.1141032237724597 |
| XP_215924 | 1.5767871759662826 |
| XP_215927 | 1.0735277515150528 |
| XP_215931 | -1                 |
| XP_215932 | 1.164284668131841  |
| XP_215935 | 0.8953257205711749 |
| XP_215938 | -1                 |
| XP_215942 | 1.0484206140479286 |
| XP_215947 | 1.753950342396195  |
| XP_215949 | 0.9726307280751642 |
| XP_215951 | 0.917138839685469  |
| XP_215952 | 1.1881056248241946 |
| XP_215953 | 1.5370121531772154 |
| XP_215960 | 0.9460229589035443 |
| XP_215963 | 1.6286326889818006 |
| XP_215964 | 1.111480416017701  |
| XP_215974 | 1.0812345679078723 |
| XP_215977 | -1                 |
| XP_215979 | 1.0157540487940981 |
| XP_215981 | 0.8853883959097373 |
| XP_215982 | -1                 |
| XP_215984 | 1.9884837586998905 |
| XP_215985 | 1.6074030510055204 |
| XP_215991 | 0.9492893015030743 |
| XP_215993 | 0.9104790158291026 |
| XP_215994 | 0.8452781612609988 |
| XP_216002 | 0.9752183019888127 |
| XP_216010 | 1.0142407709433734 |
| XP_216011 | 0.9962007506941357 |
| XP_216013 | 0.6995949691789308 |
| XP_216018 | 2.2107930439701393 |
| XP_216019 | 1.414480120210237  |
| XP_216020 | -1                 |
| XP_216024 | 1.0576390493023642 |
| XP_216025 | 0.9554848570237505 |
| XP_216026 | 1.6458921146333967 |
| XP_216034 | 0.9490151805497741 |
| XP_216035 | 1.2359134477704143 |
| XP_216040 | 1.1675336792128228 |
| XP_216041 | 0.8422018583370171 |
| XP_216042 | 0.6201376957203879 |
| XP_216044 | 0.7289839458295967 |

|           |                     |
|-----------|---------------------|
| XP_216050 | 1.2174824179355193  |
| XP_216056 | 1.003482019829961   |
| XP_216062 | 1.0233497135319332  |
| XP_216063 | 1.292768943750738   |
| XP_216079 | 1.141971151986062   |
| XP_216081 | 2.030764259390002   |
| XP_216095 | 0.8724702131546347  |
| XP_216102 | 0.9925194141785799  |
| XP_216107 | -1                  |
| XP_216108 | -1                  |
| XP_216112 | -1                  |
| XP_216113 | 1.1699028462423822  |
| XP_216124 | 0.9841327926037203  |
| XP_216130 | -1                  |
| XP_216135 | 0.7774056084508684  |
| XP_216137 | 1.3611037905869463  |
| XP_216142 | 0.4331095148303729  |
| XP_216152 | 0.8329108463165592  |
| XP_216169 | 0.8964580668946818  |
| XP_216170 | 0.31475026771799564 |
| XP_216171 | 1.219215169650637   |
| XP_216173 | 1.0016166294285247  |
| XP_216179 | 0.8953359394858539  |
| XP_216180 | 0.861748738013007   |
| XP_216181 | 0.7253517453412089  |
| XP_216188 | 0.6617260876534033  |
| XP_216191 | 0.787793776689324   |
| XP_216192 | 0.6221645832009569  |
| XP_216194 | 0.7269752745330854  |
| XP_216195 | 0.7159119879980297  |
| XP_216196 | 0.6585275585196421  |
| XP_216198 | 0.8634137593540949  |
| XP_216202 | 1.0210208591840586  |
| XP_216203 | 0.9227499435300711  |
| XP_216209 | -1                  |
| XP_216212 | 0.7310655046681868  |
| XP_216219 | 0.9877764372211667  |
| XP_216220 | 0.7161442697816064  |
| XP_216222 | 0.8137682888046115  |
| XP_216227 | 1.2108969500835018  |
| XP_216228 | 1.3660582233632206  |
| XP_216230 | 0.9841435966063322  |
| XP_216232 | -1                  |
| XP_216240 | 0.8882645108830046  |
| XP_216249 | 0.9570900367578257  |
| XP_216263 | 0.9176375549743644  |
| XP_216265 | 0.9236051555620377  |
| XP_216269 | 1.07311963642609    |
| XP_216270 | 1.0084356486938646  |
| XP_216272 | 0.8088533254859777  |
| XP_216274 | 1.1261757462138287  |
| XP_216276 | 0.6567453981214288  |
| XP_216278 | 0.5706927915064705  |
| XP_216283 | 1.135394172626529   |
| XP_216287 | 0.893295457485015   |
| XP_216299 | 1.2710970020738657  |
| XP_216306 | 1.10323186944128    |
| XP_216309 | 0.9114085904391276  |
| XP_216310 | -1                  |
| XP_216312 | 2.4833155741381274  |
| XP_216316 | 1.2744802079388875  |
| XP_216317 | 0.8903077866883543  |

|           |                    |
|-----------|--------------------|
| XP_216318 | 1.1652859112410372 |
| XP_216323 | 1.090369887403609  |
| XP_216331 | 1.110205383182451  |
| XP_216340 | 1.4794059016159282 |
| XP_216345 | -1                 |
| XP_216347 | 0.9173344018409283 |
| XP_216349 | 0.6095266587769207 |
| XP_216357 | 1.2412910790772975 |
| XP_216362 | 0.7590941563361802 |
| XP_216363 | -1                 |
| XP_216366 | -1                 |
| XP_216368 | 0.9485076732822189 |
| XP_216369 | 1.27221679184436   |
| XP_216371 | 1.199591458939416  |
| XP_216372 | 1.051989687790634  |
| XP_216376 | 0.6141551227279487 |
| XP_216377 | 0.8813154654989309 |
| XP_216378 | 0.876342082629816  |
| XP_216388 | -1                 |
| XP_216396 | 0.7004782956053641 |
| XP_216398 | 0.8349828637443895 |
| XP_216400 | 0.7555307342356969 |
| XP_216401 | -1                 |
| XP_216403 | -1                 |
| XP_216407 | 1.5888060021053896 |
| XP_216408 | 0.9339019682483518 |
| XP_216410 | 0.5202092806789965 |
| XP_216411 | 1.0024457619232399 |
| XP_216415 | 0.8319323784032261 |
| XP_216417 | -1                 |
| XP_216418 | 0.8073872697816107 |
| XP_216422 | 1.4272454563370542 |
| XP_216433 | 1.010421574673817  |
| XP_216438 | 1.082271184000902  |
| XP_216439 | 0.7387470838937636 |
| XP_216443 | -1                 |
| XP_216444 | 0.8758824412556035 |
| XP_216446 | 0.9725119032409678 |
| XP_216454 | 1.4020342812433717 |
| XP_216457 | 0.7048662068599351 |
| XP_216459 | -1                 |
| XP_216466 | 0.9424692929817873 |
| XP_216471 | -1                 |
| XP_216473 | 0.8149075426006308 |
| XP_216477 | 0.9436186093599289 |
| XP_216479 | -1                 |
| XP_216480 | 0.7750408641924595 |
| XP_216482 | 0.9523059793052516 |
| XP_216483 | -1                 |
| XP_216484 | 1.035578254765696  |
| XP_216485 | 0.8734096557857544 |
| XP_216490 | 1.0515291349090123 |
| XP_216492 | 0.8994031141755322 |
| XP_216499 | 0.9471168128664651 |
| XP_216504 | 1.052012487637805  |
| XP_216505 | 0.8070039896864807 |
| XP_216509 | 0.9638576838591639 |
| XP_216510 | 1.0879818387796127 |
| XP_216515 | -1                 |
| XP_216516 | 1.0236879682455315 |
| XP_216517 | 1.0231387509769736 |
| XP_216518 | -1                 |

|           |                     |
|-----------|---------------------|
| XP_216521 | 0.9682475894886052  |
| XP_216524 | 0.870151352357482   |
| XP_216525 | -1                  |
| XP_216526 | 1.1139582583507803  |
| XP_216527 | 0.9333546216385514  |
| XP_216529 | 1.0845273025153945  |
| XP_216537 | -1                  |
| XP_216539 | 1.0544088487336039  |
| XP_216541 | 1.0666856229939055  |
| XP_216542 | 0.9055213857654024  |
| XP_216543 | 1.0514936906649879  |
| XP_216545 | 0.8476922475251695  |
| XP_216546 | 1.2756662678248132  |
| XP_216547 | 0.7811560673220016  |
| XP_216548 | -1                  |
| XP_216552 | 0.7088233365297576  |
| XP_216558 | 1.054575659159491   |
| XP_216563 | 0.8176587710044221  |
| XP_216565 | 1.2435371544457567  |
| XP_216567 | 0.8098279869011868  |
| XP_216577 | 1.1748733536486844  |
| XP_216580 | -1                  |
| XP_216584 | -1                  |
| XP_216586 | 1.5817179313258596  |
| XP_216589 | 0.8272940701708257  |
| XP_216592 | -1                  |
| XP_216596 | 0.9564626399500534  |
| XP_216597 | 1.0143941698776595  |
| XP_216599 | 0.7067673276686164  |
| XP_216604 | 1.0912952836773775  |
| XP_216606 | 0.7367017684796954  |
| XP_216607 | -1                  |
| XP_216609 | 0.8116797848328036  |
| XP_216610 | 0.9238474683517229  |
| XP_216611 | 0.9906973624377113  |
| XP_216616 | 0.805336948554242   |
| XP_216632 | 0.6091127474969938  |
| XP_216633 | 0.9489984485984513  |
| XP_216634 | 1.6400470990459866  |
| XP_216635 | 1.0087311715750145  |
| XP_216638 | 0.8700392902933501  |
| XP_216643 | 0.8089727251551245  |
| XP_216644 | 1.3840155832644065  |
| XP_216648 | 0.8257696696323628  |
| XP_216650 | 0.6899815685551832  |
| XP_216651 | 0.9803500871771998  |
| XP_216656 | 0.8250544856214829  |
| XP_216661 | 1.0381510632161366  |
| XP_216665 | 0.20011316644356467 |
| XP_216666 | 1.083233660033615   |
| XP_216667 | 0.9356910973093968  |
| XP_216670 | 1.0101525960555933  |
| XP_216672 | 0.8755176735609198  |
| XP_216677 | 1.6153604034642546  |
| XP_216678 | 2.0904802294680667  |
| XP_216679 | 0.7520457743820578  |
| XP_216689 | 0.7696049773785781  |
| XP_216701 | 1.0061119987903393  |
| XP_216704 | -1                  |
| XP_216706 | 0.910409561928999   |
| XP_216707 | -1                  |
| XP_216709 | 0.9336153909929148  |



|           |                     |
|-----------|---------------------|
| XP_216716 | 1.1742584235846876  |
| XP_216717 | 0.7627470820842173  |
| XP_216720 | -1                  |
| XP_216721 | 1.0248500257966129  |
| XP_216729 | 0.9147974092759056  |
| XP_216733 | 0.990542512915678   |
| XP_216738 | 1.1571622346363966  |
| XP_216739 | 1.056400284393184   |
| XP_216740 | 0.8105698810232621  |
| XP_216741 | 1.1378210255746088  |
| XP_216744 | 0.9142640401299338  |
| XP_216747 | 1.0097357349734177  |
| XP_216748 | 0.9482312945525412  |
| XP_216750 | 1.0611500498794821  |
| XP_216751 | 1.0744953262469727  |
| XP_216752 | 0.7576005412181388  |
| XP_216755 | 1.054381847369963   |
| XP_216757 | 1.3450770996026358  |
| XP_216759 | 1.0012032132099464  |
| XP_216762 | 1.0980628812849933  |
| XP_216763 | 0.8123656915582563  |
| XP_216765 | 0.9163982463736802  |
| XP_216766 | 1.4017012250866412  |
| XP_216776 | 2.1961565238713376  |
| XP_216777 | -1                  |
| XP_216781 | 1.1480113456176935  |
| XP_216782 | -1                  |
| XP_216784 | 1.1373574275663247  |
| XP_216785 | 0.9182358324601952  |
| XP_216787 | 0.9441253854040981  |
| XP_216791 | 1.6690259975008523  |
| XP_216799 | 0.7847966729025866  |
| XP_216800 | 0.45146032429985145 |
| XP_216802 | -1                  |
| XP_216805 | 1.0440923583649289  |
| XP_216815 | 0.8349799914892264  |
| XP_216820 | 1.049819402357904   |
| XP_216827 | 0.9045180261084559  |
| XP_216828 | 0.8843610381192647  |
| XP_216835 | 0.8854973951655971  |
| XP_216836 | 0.8323192515149552  |
| XP_216837 | 1.0072210138525752  |
| XP_216839 | 0.7298120995223812  |
| XP_216841 | 0.7306471139065168  |
| XP_216844 | 1.1352476791457902  |
| XP_216845 | 1.039687528023562   |
| XP_216848 | -1                  |
| XP_216850 | 1.3288270490540215  |
| XP_216854 | 0.6078891819978128  |
| XP_216859 | 0.852631093203267   |
| XP_216862 | 1.3857629367353903  |
| XP_216872 | 0.9055738468079495  |
| XP_216874 | -1                  |
| XP_216880 | 0.8756480828541333  |
| XP_216882 | 0.8674120438204102  |
| XP_216886 | 0.8209678171380953  |
| XP_216890 | 1.0392897576829705  |
| XP_216892 | 1.3494870350718702  |
| XP_216893 | 1.1250639185072537  |
| XP_216899 | 1.8762511050942834  |
| XP_216900 | 1.0712347399368871  |
| XP_216904 | 0.6292696293207004  |

|           |                    |
|-----------|--------------------|
| XP.216905 | 1.7254292548187617 |
| XP.216910 | 1.2368566054777796 |
| XP.216911 | 1.1731188870278408 |
| XP.216913 | 0.8790519278762456 |
| XP.216915 | 1.069189935018583  |
| XP.216921 | 1.0922371453980417 |
| XP.216922 | 1.0587525988097812 |
| XP.216927 | 0.9495224075406664 |
| XP.216928 | 1.0055566082639518 |
| XP.216929 | 0.934632381893925  |
| XP.216934 | 0.9700559320927875 |
| XP.216938 | 1.2592615939472145 |
| XP.216940 | 1.438010665192856  |
| XP.216941 | -1                 |
| XP.216944 | 0.8328777907451536 |
| XP.216945 | 1.1561208585603788 |
| XP.216949 | 0.8019839642835818 |
| XP.216955 | 0.8923592923491067 |
| XP.216959 | 2.042248130903182  |
| XP.216960 | -1                 |
| XP.216962 | 1.0190436004806969 |
| XP.216963 | 0.8449206459592862 |
| XP.216964 | 0.7502888076765037 |
| XP.216965 | -1                 |
| XP.216966 | 3.006688102006102  |
| XP.216967 | 0.8344854503408277 |
| XP.216968 | 0.7589678430893169 |
| XP.216969 | 1.1078917055597772 |
| XP.216970 | -1                 |
| XP.216973 | 1.3767518384601436 |
| XP.216979 | -1                 |
| XP.216981 | 0.891070336182466  |
| XP.216983 | 1.3488052569527582 |
| XP.216985 | 1.144974853716504  |
| XP.216989 | 1.1286332986440488 |
| XP.216991 | 0.7858682401016357 |
| XP.217013 | 0.8820681735183165 |
| XP.217014 | 1.0711496143286012 |
| XP.217016 | 1.0221461244305379 |
| XP.217017 | 1.041939510095306  |
| XP.217018 | 0.9272163662467428 |
| XP.217019 | 1.0476666299401967 |
| XP.217021 | 1.4013381691003586 |
| XP.217022 | 0.8511924358901266 |
| XP.217035 | 0.5774039565736951 |
| XP.217036 | 1.2270025459683858 |
| XP.217038 | 1.2471064115005108 |
| XP.217041 | 0.7777048860608948 |
| XP.217044 | -1                 |
| XP.217046 | 1.1006855914039193 |
| XP.217048 | 1.0722250853965107 |
| XP.217050 | 0.9209490030509855 |
| XP.217055 | 0.9812692551589267 |
| XP.217061 | 0.8657154501443595 |
| XP.217062 | 0.7805311711720689 |
| XP.217063 | 1.151489465915161  |
| XP.217078 | -1                 |
| XP.217080 | 1.06376580655204   |
| XP.217086 | 1.1226396101923488 |
| XP.217089 | 1.4076168969224296 |
| XP.217092 | -1                 |
| XP.217093 | -1                 |

|           |                     |
|-----------|---------------------|
| XP_217094 | 0.996236232740008   |
| XP_217103 | 0.9685501105665499  |
| XP_217105 | 1.1182861101712425  |
| XP_217106 | 1.3132810562862496  |
| XP_217113 | 0.7764037133988383  |
| XP_217114 | -1                  |
| XP_217115 | 1.0711049216874187  |
| XP_217120 | 1.0347123392160515  |
| XP_217121 | -1                  |
| XP_217129 | -1                  |
| XP_217130 | 0.8231522700377778  |
| XP_217134 | 1.1470508207361172  |
| XP_217136 | 1.127684456289526   |
| XP_217138 | -1                  |
| XP_217141 | 1.724778443630119   |
| XP_217144 | 0.7338246142183872  |
| XP_217146 | 0.7970380417083041  |
| XP_217148 | 1.0316966249199002  |
| XP_217149 | 1.0840454842627303  |
| XP_217152 | 1.3868119380319845  |
| XP_217155 | 0.8933902969001705  |
| XP_217157 | 0.9842848808929906  |
| XP_217161 | 1.0798054734395366  |
| XP_217165 | 0.5301315071190523  |
| XP_217167 | -1                  |
| XP_217170 | 1.1606440828804019  |
| XP_217177 | -1                  |
| XP_217180 | -1                  |
| XP_217181 | 0.8248305378214225  |
| XP_217185 | 1.0003115955253297  |
| XP_217189 | 1.1225657488131624  |
| XP_217193 | 1.0848670625084598  |
| XP_217194 | 0.40249104108198597 |
| XP_217195 | 0.9102398616138907  |
| XP_217197 | 1.4230608870966532  |
| XP_217198 | -1                  |
| XP_217200 | -1                  |
| XP_217206 | 1.0605221202491906  |
| XP_217208 | 0.8586657081213137  |
| XP_217209 | 0.9848323302338867  |
| XP_217210 | 1.1488116828278019  |
| XP_217219 | 0.5679767636284544  |
| XP_217224 | 1.0016928320502452  |
| XP_217235 | 1.0368483181217574  |
| XP_217239 | 0.9479358674323723  |
| XP_217245 | 1.0884168022445362  |
| XP_217246 | 0.7818739341503737  |
| XP_217250 | 1.269086788918626   |
| XP_217254 | 0.9720090947926782  |
| XP_217258 | 0.8713834229501655  |
| XP_217262 | 0.9975286402754335  |
| XP_217263 | 0.9272933712293989  |
| XP_217268 | -1                  |
| XP_217275 | 1.120634401447959   |
| XP_217279 | 0.978122874495781   |
| XP_217283 | 0.8480387005139258  |
| XP_217284 | 0.9522305584545312  |
| XP_217285 | 0.9787052151510972  |
| XP_217293 | -1                  |
| XP_217294 | 0.9839684431288195  |
| XP_217295 | 0.9270545171092773  |
| XP_217296 | 1.5130414855075964  |

|           |                    |
|-----------|--------------------|
| XP_217297 | 1.3353348137147618 |
| XP_217300 | 1.0484313021214544 |
| XP_217304 | -1                 |
| XP_217313 | 0.8453615670686214 |
| XP_217314 | 0.830998605550481  |
| XP_217317 | -1                 |
| XP_217318 | 0.9922860231365364 |
| XP_217320 | 1.245507837437488  |
| XP_217326 | -1                 |
| XP_217334 | 0.9244940815968601 |
| XP_217341 | -1                 |
| XP_217342 | -1                 |
| XP_217346 | 1.9680366986971716 |
| XP_217350 | 0.6217459919308732 |
| XP_217355 | 0.9321128302580686 |
| XP_217359 | 1.075730958783741  |
| XP_217363 | 1.4223459887240975 |
| XP_217372 | 1.4108575645838712 |
| XP_217373 | 1.0425628439055308 |
| XP_217375 | 1.3462841972432775 |
| XP_217378 | 0.9116955286314835 |
| XP_217381 | 1.6201749773073413 |
| XP_217393 | 1.1187479763380763 |
| XP_217397 | 0.9921973965248415 |
| XP_217400 | 0.7306265181540298 |
| XP_217405 | 1.0038827971644408 |
| XP_217409 | 0.8634728358383903 |
| XP_217410 | 0.5942058061456338 |
| XP_217414 | 1.0912745711484464 |
| XP_217421 | 0.8925770343435896 |
| XP_217431 | 0.8760853950084724 |
| XP_217432 | 1.1401340585042326 |
| XP_217436 | 0.9926813178008166 |
| XP_217437 | 0.769688015894067  |
| XP_217441 | 1.050214064039969  |
| XP_217444 | 0.8239461913291972 |
| XP_217445 | 0.7843761748153711 |
| XP_217448 | 1.116669400247561  |
| XP_217450 | 0.7802443004296388 |
| XP_217454 | 1.0440917409805004 |
| XP_217458 | 1.0158971257298222 |
| XP_217464 | 1.2085956989534854 |
| XP_217465 | 0.8109463793327962 |
| XP_217470 | 0.6485700756049538 |
| XP_217474 | 0.970001041660677  |
| XP_217475 | 0.764697284887044  |
| XP_217476 | 1.1899170694487238 |
| XP_217492 | 0.9447969813351801 |
| XP_217505 | 1.1269969128975743 |
| XP_217514 | 1.152259857356081  |
| XP_217519 | 1.6927799976802163 |
| XP_217535 | 1.3896459495409366 |
| XP_217550 | 0.8150369470756743 |
| XP_217560 | 1.0056438510847625 |
| XP_217563 | 0.7581086493200558 |
| XP_217568 | 0.8885932376129756 |
| XP_217570 | 1.0626518132303195 |
| XP_217572 | 0.8373232284262769 |
| XP_217585 | 1.2659043579362665 |
| XP_217586 | 0.8490370079556532 |
| XP_217587 | 0.7883071453874013 |
| XP_217592 | 0.6459162344097357 |

|           |                     |
|-----------|---------------------|
| XP_217594 | 1.0024744027740502  |
| XP_217595 | 1.0681341802133533  |
| XP_217596 | 0.8342849506131516  |
| XP_217599 | 1.298296428540278   |
| XP_217601 | 1.095970530618356   |
| XP_217607 | -1                  |
| XP_217612 | -1                  |
| XP_217615 | 1.0680105490575313  |
| XP_217616 | 1.8036411675179878  |
| XP_217637 | -1                  |
| XP_217641 | 1.2749947132229262  |
| XP_217642 | 0.8590427297750917  |
| XP_217647 | -1                  |
| XP_217657 | 1.5981530950145624  |
| XP_217663 | 1.3564426893630468  |
| XP_217671 | 1.2928152213740753  |
| XP_217680 | 0.9318838850854969  |
| XP_217689 | -1                  |
| XP_217693 | 1.0961077676869133  |
| XP_217724 | -1                  |
| XP_217725 | -1                  |
| XP_217732 | 0.6273119736243381  |
| XP_217737 | 1.0853247092862928  |
| XP_217743 | -1                  |
| XP_217744 | -1                  |
| XP_217745 | 1.0512133784634632  |
| XP_217785 | 1.155356320045626   |
| XP_217791 | 0.8319477608708478  |
| XP_217792 | 1.7744465227199104  |
| XP_217804 | 1.0330162243874208  |
| XP_217806 | 1.7214853575868077  |
| XP_217807 | 1.8344035446311526  |
| XP_217819 | 0.6609260813400503  |
| XP_217825 | -1                  |
| XP_217827 | 1.0862024503698033  |
| XP_217838 | -1                  |
| XP_217848 | -1                  |
| XP_217910 | 0.9432005139449599  |
| XP_217944 | 1.0050239573724424  |
| XP_217963 | 1.2109056156521059  |
| XP_217975 | 1.018129823459649   |
| XP_218002 | 0.9776851314506664  |
| XP_218008 | 1.2879979628242297  |
| XP_218012 | 0.8718171998924417  |
| XP_218037 | 0.9683414630168783  |
| XP_218041 | 1.269699647667999   |
| XP_218069 | 1.13194879762107    |
| XP_218070 | 1.1760266017467926  |
| XP_218081 | 1.213783273523547   |
| XP_218084 | 0.620559522154249   |
| XP_218085 | 1.0094299269130784  |
| XP_218094 | 0.9844030107202549  |
| XP_218114 | 1.7524811489775953  |
| XP_218124 | 1.4962368740881906  |
| XP_218128 | 1.138326615085902   |
| XP_218148 | 1.2655351383068492  |
| XP_218157 | 0.7991352892481194  |
| XP_218158 | 1.0106190500342664  |
| XP_218162 | 1.0100931758072622  |
| XP_218181 | 0.44937875273604133 |
| XP_218185 | 1.179852811862245   |
| XP_218187 | 1.0954768431933855  |

|           |                     |
|-----------|---------------------|
| XP_218198 | 1.1951563442859612  |
| XP_218199 | 1.156219108026196   |
| XP_218202 | -1                  |
| XP_218203 | 0.77545323568834    |
| XP_218204 | 0.7340766060154773  |
| XP_218209 | 0.64792806219068    |
| XP_218215 | 1.2395123856844663  |
| XP_218220 | -1                  |
| XP_218221 | 1.1980740004223642  |
| XP_218223 | 0.37388515756490537 |
| XP_218226 | 1.1085567029213996  |
| XP_218227 | 1.1588755319488453  |
| XP_218238 | 0.9549893375784976  |
| XP_218248 | 0.7008189301602504  |
| XP_218274 | 0.8117297882259447  |
| XP_218275 | -1                  |
| XP_218287 | 1.054061018636563   |
| XP_218292 | 1.908135032325194   |
| XP_218336 | 1.1257996443283416  |
| XP_218337 | 1.1338389330711676  |
| XP_218342 | 1.1802479147021112  |
| XP_218343 | 0.8380267894217244  |
| XP_218345 | -1                  |
| XP_218346 | 1.512002698424011   |
| XP_218355 | 1.044329642864841   |
| XP_218358 | 0.8652616798851517  |
| XP_218364 | 1.2024544676100652  |
| XP_218368 | 0.9626564172279259  |
| XP_218378 | 0.859634029137809   |
| XP_218382 | 1.5787990780710999  |
| XP_218384 | -1                  |
| XP_218395 | 1.355336837651904   |
| XP_218398 | -1                  |
| XP_218405 | 1.1053158622223604  |
| XP_218412 | 0.9850056956365325  |
| XP_218414 | 1.0175065510517167  |
| XP_218415 | -1                  |
| XP_218421 | 1.6503483671098056  |
| XP_218425 | 0.9500613194270828  |
| XP_218426 | 0.8711887902490963  |
| XP_218427 | 0.5735955493144714  |
| XP_218444 | 1.07766879238053    |
| XP_218446 | -1                  |
| XP_218447 | 1.1078099937400372  |
| XP_218452 | 0.6802927260697995  |
| XP_218456 | 1.4627083981748508  |
| XP_218459 | 1.1753584695062245  |
| XP_218461 | 0.9894846061286328  |
| XP_218462 | 1.4732782739664076  |
| XP_218473 | 1.522014846933648   |
| XP_218479 | 0.8927377985621023  |
| XP_218483 | 0.9007965303928843  |
| XP_218487 | 0.9911889236786838  |
| XP_218502 | 1.1424187734122675  |
| XP_218522 | 1.1407390038451242  |
| XP_218546 | 0.780334002913909   |
| XP_218549 | 1.2698907108844788  |
| XP_218558 | 1.0382509002699485  |
| XP_218577 | 1.2749499314453852  |
| XP_218589 | 0.6319937895614401  |
| XP_218592 | -1                  |
| XP_218594 | -1                  |

|           |                    |
|-----------|--------------------|
| XP_218595 | 1.3068132786509778 |
| XP_218598 | 1.249756322483827  |
| XP_218608 | 1.148483663780045  |
| XP_218609 | 0.8905048075222792 |
| XP_218615 | -1                 |
| XP_218619 | 1.2214625457541064 |
| XP_218620 | 1.3699676434735608 |
| XP_218625 | 0.7200889985436069 |
| XP_218630 | 1.0702002559361745 |
| XP_218633 | 1.293907953955846  |
| XP_218638 | 1.363052680425463  |
| XP_218639 | 1.0246360045929368 |
| XP_218648 | -1                 |
| XP_218652 | 0.9605196100548904 |
| XP_218663 | 0.9246823994399083 |
| XP_218665 | 1.0781213888989412 |
| XP_218667 | 3.392728489555878  |
| XP_218676 | 1.0592850374608347 |
| XP_218703 | 1.1439431446550232 |
| XP_218704 | 1.1751392892816361 |
| XP_218706 | 1.7596956953585252 |
| XP_218717 | 1.212005022732443  |
| XP_218720 | 0.9670420581782938 |
| XP_218734 | 0.8670747532393993 |
| XP_218743 | -1                 |
| XP_218753 | 1.350625126182672  |
| XP_218755 | 0.9738486426883604 |
| XP_218759 | 0.969194499402236  |
| XP_218760 | 0.7876299371227731 |
| XP_218762 | 1.07141045299066   |
| XP_218776 | 1.16482481492366   |
| XP_218780 | 1.0143015341589865 |
| XP_218815 | 1.384633392791466  |
| XP_218816 | 0.9513463403691748 |
| XP_218817 | 1.3207535454003145 |
| XP_218818 | 1.2252045045842213 |
| XP_218819 | 1.0808163246727784 |
| XP_218821 | 1.2513237333112903 |
| XP_218824 | 1.2865182642397213 |
| XP_218829 | 1.035377173015347  |
| XP_218832 | 1.7432742416335618 |
| XP_218833 | 1.0574451387932398 |
| XP_218841 | 0.9526482242331611 |
| XP_218845 | 1.290809632596612  |
| XP_218852 | -1                 |
| XP_218855 | -1                 |
| XP_218859 | -1                 |
| XP_218860 | 0.8766006783931416 |
| XP_218861 | -1                 |
| XP_218868 | 1.1636859573748397 |
| XP_218897 | 1.135473370884345  |
| XP_218915 | 1.2765078345308984 |
| XP_218927 | 0.5654599317618074 |
| XP_218929 | 0.8353309982841627 |
| XP_218937 | 1.1482138175612275 |
| XP_218949 | 1.188146661353334  |
| XP_218953 | 1.257606981471778  |
| XP_218958 | 1.1173857251969335 |
| XP_218963 | 1.2657033328602363 |
| XP_218964 | 0.9216246862081245 |
| XP_218972 | 1.4281235264820464 |
| XP_218975 | -1                 |

|           |                    |
|-----------|--------------------|
| XP_218977 | 1.1724863871963773 |
| XP_218980 | 1.471000199222967  |
| XP_218995 | 0.8917313607186691 |
| XP_218997 | 1.2614132793315698 |
| XP_218999 | -1                 |
| XP_219002 | 1.1843651805592357 |
| XP_219006 | 1.0114052687951745 |
| XP_219016 | 1.1343622799600324 |
| XP_219039 | 1.164837035870473  |
| XP_219062 | 1.1377378235771343 |
| XP_219068 | 1.1961292218092636 |
| XP_219070 | 1.0656062914439433 |
| XP_219074 | 0.9899707771722536 |
| XP_219081 | 0.8309183761763661 |
| XP_219083 | 1.0124844835697207 |
| XP_219088 | 1.3271017381430772 |
| XP_219101 | 1.0279213147073234 |
| XP_219126 | 1.1173472347594127 |
| XP_219127 | 1.1707279021179693 |
| XP_219128 | 0.8696284716606127 |
| XP_219130 | 1.1024353800806488 |
| XP_219135 | 0.9815751380600579 |
| XP_219176 | -1                 |
| XP_219183 | -1                 |
| XP_219184 | -1                 |
| XP_219194 | 1.19018436086342   |
| XP_219202 | 1.1970370134786592 |
| XP_219204 | 1.1195283935764864 |
| XP_219208 | 1.048429953490668  |
| XP_219221 | -1                 |
| XP_219264 | 1.2244665586447185 |
| XP_219265 | 0.5782125005037485 |
| XP_219276 | 1.0444668782407327 |
| XP_219279 | -1                 |
| XP_219281 | -1                 |
| XP_219290 | -1                 |
| XP_219292 | 1.671904196386959  |
| XP_219296 | 0.8582604858662765 |
| XP_219297 | 1.087762552590578  |
| XP_219312 | 1.2293774687700796 |
| XP_219314 | 1.4341900559406489 |
| XP_219318 | 0.7529088775832565 |
| XP_219325 | 1.1707634602445005 |
| XP_219336 | 1.1996649771273447 |
| XP_219345 | 1.933687715291665  |
| XP_219352 | 1.2234002935563935 |
| XP_219354 | 1.0673197809428647 |
| XP_219356 | 1.1429798895810634 |
| XP_219359 | 0.9092693065347776 |
| XP_219363 | 0.9278311028575311 |
| XP_219364 | 1.012682634939162  |
| XP_219365 | 0.8310910587765803 |
| XP_219372 | 0.8816321396182275 |
| XP_219373 | 0.8387142532284942 |
| XP_219376 | 1.2351764505288259 |
| XP_219386 | 1.4760038402640798 |
| XP_219389 | 1.3242335188680472 |
| XP_219392 | 1.6804178621689667 |
| XP_219401 | -1                 |
| XP_219414 | 1.0341528140107643 |
| XP_219437 | -1                 |
| XP_219441 | 0.9286367490335143 |



|           |                    |
|-----------|--------------------|
| XP_219450 | 0.8760507890351956 |
| XP_219454 | -1                 |
| XP_219462 | 1.073508425373659  |
| XP_219470 | 1.288368195738082  |
| XP_219477 | -1                 |
| XP_219490 | -1                 |
| XP_219494 | 1.0276712345653733 |
| XP_219498 | 0.9435421339193292 |
| XP_219503 | 1.019305580339162  |
| XP_219510 | 1.0298635664592384 |
| XP_219511 | 1.3440261775762672 |
| XP_219515 | 1.1652603000627761 |
| XP_219517 | -1                 |
| XP_219519 | 0.7956009153351661 |
| XP_219525 | 1.1005154647615256 |
| XP_219526 | 1.0109888264181854 |
| XP_219529 | 0.7575479632440606 |
| XP_219535 | 1.2247646164491677 |
| XP_219540 | 1.9363646276194038 |
| XP_219546 | -1                 |
| XP_219554 | 1.1822107053532456 |
| XP_219556 | 1.047912033008626  |
| XP_219557 | 1.0433480318521065 |
| XP_219563 | 0.847878792907651  |
| XP_219564 | 0.7917100471322422 |
| XP_219575 | 1.041458798105605  |
| XP_219576 | 1.1367458976904319 |
| XP_219579 | 1.22884936700566   |
| XP_219584 | 1.2450313474662906 |
| XP_219600 | 1.141359021504856  |
| XP_219602 | 1.151803557688716  |
| XP_219604 | 1.6135386155620826 |
| XP_219609 | -1                 |
| XP_219631 | 0.8020397672966576 |
| XP_219651 | 1.404980585060381  |
| XP_219677 | -1                 |
| XP_219679 | 0.7204211894488151 |
| XP_219683 | 0.9109361151431895 |
| XP_219685 | 1.0375327393971532 |
| XP_219692 | -1                 |
| XP_219694 | 1.1176431186231222 |
| XP_219703 | -1                 |
| XP_219705 | 1.2198865532429963 |
| XP_219708 | 1.7215116218034763 |
| XP_219716 | 1.0277412480293684 |
| XP_219720 | -1                 |
| XP_219723 | 1.1388824908569548 |
| XP_219728 | -1                 |
| XP_219729 | 1.2026482203205484 |
| XP_219736 | 1.2448989933997174 |
| XP_219747 | 1.0036609659102886 |
| XP_219749 | -1                 |
| XP_219757 | 0.9998561215033422 |
| XP_219766 | 1.0980304857908367 |
| XP_219775 | 0.9859908710575589 |
| XP_219777 | -1                 |
| XP_219778 | 1.225566948846629  |
| XP_219785 | -1                 |
| XP_219793 | -1                 |
| XP_219819 | -1                 |
| XP_219820 | 0.6588452942303744 |
| XP_219825 | 1.059402510520301  |

|           |                     |
|-----------|---------------------|
| XP_219848 | 1.533913136072263   |
| XP_219856 | 1.0611576877219442  |
| XP_219860 | 0.893724913848399   |
| XP_219866 | 0.909318896021208   |
| XP_219870 | 1.215288009998236   |
| XP_219873 | 0.6471120445722077  |
| XP_219879 | -1                  |
| XP_219880 | 1.4011678802027128  |
| XP_219895 | 1.173746341906375   |
| XP_219896 | -1                  |
| XP_219902 | -1                  |
| XP_219905 | 6.160905743454783   |
| XP_219909 | -1                  |
| XP_219915 | -1                  |
| XP_219925 | 2.769977559347474   |
| XP_219926 | -1                  |
| XP_219938 | 1.0909165515210737  |
| XP_219939 | 1.117360674096365   |
| XP_219944 | 0.932596110522241   |
| XP_219948 | 0.954682651032984   |
| XP_219959 | 0.5366805530038915  |
| XP_219962 | 1.6172778644035504  |
| XP_219963 | -1                  |
| XP_219967 | 1.6282257045932769  |
| XP_219971 | 0.9044812853845078  |
| XP_219976 | 0.7568639198910128  |
| XP_219998 | 1.3282146450166725  |
| XP_220013 | 2.611038402530941   |
| XP_220019 | 1.4107564360830807  |
| XP_220024 | 1.0986453930525937  |
| XP_220031 | 1.4009684636194806  |
| XP_220043 | 0.6170346762541314  |
| XP_220044 | 0.903208263854026   |
| XP_220051 | 1.3356794054474526  |
| XP_220055 | 1.468796820834127   |
| XP_220060 | -1                  |
| XP_220071 | 1.7655177575322054  |
| XP_220093 | 0.8717003437850442  |
| XP_220097 | 1.666034562804288   |
| XP_220099 | 0.9531476790420418  |
| XP_220122 | 0.7403126590537412  |
| XP_220152 | 0.9558057473347241  |
| XP_220155 | 1.1164795329982358  |
| XP_220159 | 1.1601759697666487  |
| XP_220161 | 0.9378028712475158  |
| XP_220167 | 1.2067403798163443  |
| XP_220169 | 1.1743572654511152  |
| XP_220180 | 1.3754261143116349  |
| XP_220185 | 1.5665067328907094  |
| XP_220197 | 1.0941671572025438  |
| XP_220198 | 0.7648679793847166  |
| XP_220199 | -1                  |
| XP_220206 | 0.21544485828226864 |
| XP_220207 | 1.6126184373491714  |
| XP_220220 | -1                  |
| XP_220221 | 1.0324212195262779  |
| XP_220222 | 1.4111979006390634  |
| XP_220229 | 0.965404809434912   |
| XP_220230 | 1.09647968131438    |
| XP_220231 | 0.9647074004512687  |
| XP_220232 | 1.141693209396456   |
| XP_220236 | 0.7918552723585407  |

|           |                     |
|-----------|---------------------|
| XP_220240 | 1.0671827261075604  |
| XP_220243 | 0.9473738754330127  |
| XP_220256 | 0.5816956856287301  |
| XP_220257 | 1.4623665851659509  |
| XP_220262 | 1.044700800768986   |
| XP_220263 | -1                  |
| XP_220274 | -1                  |
| XP_220286 | 0.9029329465688565  |
| XP_220308 | 1.2321501216603523  |
| XP_220335 | 0.9738049300341411  |
| XP_220341 | 0.978010419018703   |
| XP_220346 | 1.0951412912800298  |
| XP_220357 | 1.048703456924684   |
| XP_220360 | 1.0450954779680892  |
| XP_220362 | 1.1933818294937837  |
| XP_220368 | -1                  |
| XP_220373 | 1.042537658248836   |
| XP_220380 | 0.7096392966358295  |
| XP_220398 | 0.9686689587559901  |
| XP_220404 | 0.8256186562505232  |
| XP_220413 | 1.0263658690966877  |
| XP_220420 | 0.8908350388961012  |
| XP_220428 | 1.049070084622681   |
| XP_220442 | 1.0624011288706658  |
| XP_220448 | 1.8856198588400872  |
| XP_220451 | 1.2151838627999694  |
| XP_220455 | 0.9318813659151359  |
| XP_220456 | 1.3926359909944932  |
| XP_220495 | 1.1241598187966915  |
| XP_220498 | -1                  |
| XP_220504 | 0.5713639285138246  |
| XP_220508 | 1.0768685002420102  |
| XP_220511 | 0.7865190233416833  |
| XP_220513 | 1.1437508806581451  |
| XP_220514 | 0.8273530635339962  |
| XP_220520 | 1.0011313574412644  |
| XP_220522 | 0.8966118945983906  |
| XP_220530 | 0.8985143999027524  |
| XP_220532 | 0.8201893859816927  |
| XP_220535 | 2.8099074851333548  |
| XP_220540 | -1                  |
| XP_220541 | 1.0127395323576789  |
| XP_220544 | 0.7428192039607849  |
| XP_220549 | 1.2245194204364382  |
| XP_220563 | 0.32186195912141563 |
| XP_220573 | -1                  |
| XP_220576 | 0.9696898134936144  |
| XP_220582 | 0.9987922574268691  |
| XP_220588 | 1.070277534977542   |
| XP_220592 | 1.052265568242429   |
| XP_220593 | 1.4974198967274717  |
| XP_220595 | -1                  |
| XP_220600 | 1.3869840416675865  |
| XP_220602 | 1.5490382471370276  |
| XP_220603 | 1.2158177015211231  |
| XP_220606 | 0.9970899174590557  |
| XP_220607 | 0.883968269775823   |
| XP_220609 | 0.9304110600130668  |
| XP_220612 | 1.6662236299694233  |
| XP_220615 | 1.105218393798292   |
| XP_220618 | 1.2412876980771836  |
| XP_220624 | 1.0350405095844624  |

|           |                    |
|-----------|--------------------|
| XP_220627 | 1.0361757951923802 |
| XP_220632 | 0.8119056952865168 |
| XP_220636 | 1.180762407365667  |
| XP_220639 | 1.1230072799348794 |
| XP_220640 | 0.6439650486136479 |
| XP_220642 | 0.6027615758817894 |
| XP_220644 | 1.1393721022974852 |
| XP_220645 | 0.9316502228449152 |
| XP_220647 | 1.087529082030459  |
| XP_220660 | 1.0964944393740632 |
| XP_220667 | 0.72710748997498   |
| XP_220692 | 0.5576644548115847 |
| XP_220694 | 1.4585236813362104 |
| XP_220695 | 1.1618747970236492 |
| XP_220698 | -1                 |
| XP_220699 | 1.2418972030723505 |
| XP_220700 | 0.9906623477416909 |
| XP_220705 | 0.8543297218315736 |
| XP_220706 | 0.9155574889337004 |
| XP_220712 | 0.9390540533083741 |
| XP_220717 | -1                 |
| XP_220719 | -1                 |
| XP_220725 | 0.4451630343643553 |
| XP_220736 | 0.9696528583543991 |
| XP_220750 | 1.1101680929902749 |
| XP_220753 | 1.919137623496792  |
| XP_220754 | 1.0877442286427212 |
| XP_220756 | 2.2085946567806185 |
| XP_220757 | 1.0453256661332164 |
| XP_220766 | 0.9767097213890218 |
| XP_220770 | 0.8657764255330621 |
| XP_220771 | 1.996049152885148  |
| XP_220776 | 0.9946483095187705 |
| XP_220782 | -1                 |
| XP_220783 | 0.9753658306483177 |
| XP_220785 | 2.2115682321743892 |
| XP_220798 | 1.3042377636712101 |
| XP_220802 | 0.7319448145115284 |
| XP_220804 | 1.1605766113884808 |
| XP_220810 | -1                 |
| XP_220813 | 1.3574948617420513 |
| XP_220825 | 1.0505334542470481 |
| XP_220829 | 0.7433545336673396 |
| XP_220860 | 0.334082468420944  |
| XP_220882 | 1.002404989585744  |
| XP_220884 | 2.1635351099460425 |
| XP_220894 | 0.9292346200055448 |
| XP_220902 | 0.9578634063263962 |
| XP_220907 | 0.9419557613432897 |
| XP_220918 | -1                 |
| XP_220919 | 1.040516142995773  |
| XP_220928 | 1.1223444711559287 |
| XP_220931 | 1.9523607251084056 |
| XP_220938 | 1.6342444084542223 |
| XP_220950 | 1.4683537330822594 |
| XP_220957 | 1.116429568064867  |
| XP_220964 | 1.2797013474690833 |
| XP_220971 | 0.9520383953020182 |
| XP_220978 | 0.848536401016089  |
| XP_220981 | 0.9808375556390981 |
| XP_220990 | 0.9648124365837892 |
| XP_220993 | 1.4637018106871478 |

|           |                    |
|-----------|--------------------|
| XP_220994 | 1.2109613661320189 |
| XP_220996 | 1.057038892193877  |
| XP_221002 | 2.075385437979227  |
| XP_221004 | -1                 |
| XP_221008 | 0.8366679800090829 |
| XP_221015 | 1.012072570522333  |
| XP_221021 | 1.247386906779302  |
| XP_221022 | 0.7993928168064391 |
| XP_221025 | 1.2641825146158099 |
| XP_221030 | 1.3182844205528836 |
| XP_221034 | 1.851231052109104  |
| XP_221038 | 1.1036966839454263 |
| XP_221047 | 0.8863972247807318 |
| XP_221048 | 1.0013959138855744 |
| XP_221050 | 1.1637026543468647 |
| XP_221063 | 0.9991310184490808 |
| XP_221083 | -1                 |
| XP_221087 | 1.1984822552280192 |
| XP_221091 | 1.0288934757839527 |
| XP_221100 | 1.3510199727012326 |
| XP_221102 | 2.5747865404330974 |
| XP_221103 | 0.9029878139960673 |
| XP_221108 | 0.9098301631851159 |
| XP_221110 | 1.021383491588556  |
| XP_221111 | 0.7778394885114376 |
| XP_221119 | 1.1138640746613477 |
| XP_221120 | 1.0273999626097645 |
| XP_221124 | 1.0735894460036348 |
| XP_221129 | -1                 |
| XP_221136 | 1.1747697274731572 |
| XP_221139 | 1.1926198867407751 |
| XP_221141 | 1.2543931136754518 |
| XP_221142 | -1                 |
| XP_221143 | 1.7024194230017897 |
| XP_221183 | 1.0154897340947424 |
| XP_221186 | 1.0713604986630885 |
| XP_221189 | -1                 |
| XP_221191 | 1.0669267284515171 |
| XP_221195 | 0.7003679559043241 |
| XP_221202 | 0.7381752772125595 |
| XP_221212 | -1                 |
| XP_221214 | 1.0629833934702422 |
| XP_221216 | 1.0443224841266414 |
| XP_221217 | 1.0763862568048592 |
| XP_221220 | 1.4373554549394838 |
| XP_221245 | 1.3449853508719798 |
| XP_221248 | 2.1929567225253943 |
| XP_221249 | 1.3114000344942711 |
| XP_221258 | -1                 |
| XP_221261 | 1.0730580311478835 |
| XP_221268 | 0.8877152944410929 |
| XP_221270 | 0.7418607005530191 |
| XP_221272 | 1.398501433007308  |
| XP_221276 | 1.4514096758485022 |
| XP_221290 | 1.036072233363166  |
| XP_221302 | 1.3960855825919767 |
| XP_221307 | 0.8792423262542155 |
| XP_221309 | 0.8628505147341153 |
| XP_221310 | -1                 |
| XP_221319 | 0.8147441954895719 |
| XP_221321 | 0.9140629252023906 |
| XP_221337 | -1                 |

|           |                    |
|-----------|--------------------|
| XP_221343 | 1.4469065520955644 |
| XP_221345 | -1                 |
| XP_221354 | 1.1223903723481745 |
| XP_221357 | 0.6856604561352727 |
| XP_221358 | 0.9750597838915219 |
| XP_221374 | 0.9107267713487704 |
| XP_221376 | 0.8411567205556404 |
| XP_221379 | -1                 |
| XP_221382 | 0.8957606601654998 |
| XP_221384 | 1.1353452887827993 |
| XP_221387 | 1.0832272470869933 |
| XP_221392 | 0.822190189727115  |
| XP_221396 | 0.8623081038483206 |
| XP_221400 | 1.2313171238216618 |
| XP_221404 | 0.8226354030338272 |
| XP_221417 | 1.108305184901322  |
| XP_221420 | 0.9134772949815758 |
| XP_221424 | -1                 |
| XP_221437 | 1.5017150704518638 |
| XP_221438 | 0.9740226566196034 |
| XP_221439 | -1                 |
| XP_221441 | 0.9730815278694601 |
| XP_221446 | 1.0345986499967732 |
| XP_221452 | -1                 |
| XP_221454 | 1.0239662421723856 |
| XP_221455 | 0.99229656282052   |
| XP_221464 | 0.9317160088118523 |
| XP_221465 | 1.0053036017477797 |
| XP_221479 | 0.9190377734724835 |
| XP_221489 | -1                 |
| XP_221497 | 1.3329704250447252 |
| XP_221512 | 0.9818177374350094 |
| XP_221521 | 1.2136356186194779 |
| XP_221527 | 1.1043165528437704 |
| XP_221535 | 1.1659556419585098 |
| XP_221536 | 0.9942823315205582 |
| XP_221539 | 1.0752917151850194 |
| XP_221545 | 1.5332067764762203 |
| XP_221560 | 0.6565637467697176 |
| XP_221562 | 0.8485313126492331 |
| XP_221566 | -1                 |
| XP_221568 | -1                 |
| XP_221595 | 0.6766344970066488 |
| XP_221622 | 1.0108558027798078 |
| XP_221627 | 0.9913189272578853 |
| XP_221639 | 0.8306436346340575 |
| XP_221640 | 0.9957523222729124 |
| XP_221641 | 0.7666870117286885 |
| XP_221655 | 1.1670152040420132 |
| XP_221656 | 1.3257171578331042 |
| XP_221670 | 4.202839995497324  |
| XP_221671 | 1.4494488321740906 |
| XP_221672 | 2.9515604572272967 |
| XP_221690 | -1                 |
| XP_221697 | 1.1444461810003608 |
| XP_221712 | 0.9394018697792482 |
| XP_221722 | 1.18823291316491   |
| XP_221737 | 0.7886318458431115 |
| XP_221768 | 0.5598943314437826 |
| XP_221787 | 1.1147776533116203 |
| XP_221788 | 1.1959486285364784 |
| XP_221796 | 1.6399206267607138 |

|           |                    |
|-----------|--------------------|
| XP_221799 | 1.3903150122770567 |
| XP_221817 | 1.3098168977461813 |
| XP_221867 | -1                 |
| XP_221871 | 0.8771128319636009 |
| XP_221896 | 1.258245525333953  |
| XP_221910 | 1.2647084046766006 |
| XP_221913 | 1.0314657953118382 |
| XP_221915 | 1.0798345668050564 |
| XP_221916 | 0.8596866971681716 |
| XP_221920 | 0.8185208006614771 |
| XP_221922 | 0.8925951636315929 |
| XP_221925 | 1.124646377843686  |
| XP_221926 | -1                 |
| XP_221932 | -1                 |
| XP_221936 | 1.2599378613482672 |
| XP_221937 | 1.3158351618375823 |
| XP_221941 | 1.2086304943146764 |
| XP_221946 | 1.0597734158692584 |
| XP_221949 | 0.869695581102491  |
| XP_221954 | 0.8371938274077224 |
| XP_221956 | 1.3415035014681314 |
| XP_221957 | 0.9252157552289969 |
| XP_221971 | -1                 |
| XP_221972 | 0.7858641461031439 |
| XP_221990 | 1.287848673671055  |
| XP_221996 | 0.9696870727528627 |
| XP_222000 | 0.8203469901140457 |
| XP_222002 | 0.820582417544358  |
| XP_222015 | 1.0028060010433293 |
| XP_222019 | 1.026165399595234  |
| XP_222024 | 1.0773526097161008 |
| XP_222035 | 1.1110113762416627 |
| XP_222046 | 1.2146976869592052 |
| XP_222048 | 1.0860402817570967 |
| XP_222057 | 0.8255977765862659 |
| XP_222065 | 1.2533082647093357 |
| XP_222084 | 1.0933764841775397 |
| XP_222088 | 0.8755656025171855 |
| XP_222105 | 0.8783311280823219 |
| XP_222107 | 1.199382037181312  |
| XP_222140 | 1.2088327296391235 |
| XP_222145 | 1.207103041262017  |
| XP_222150 | -1                 |
| XP_222152 | 1.7545975605365738 |
| XP_222155 | 1.170867115241099  |
| XP_222157 | 1.813452383007322  |
| XP_222159 | 0.9066497742066789 |
| XP_222171 | 0.8932960015797852 |
| XP_222178 | 1.6023727782796104 |
| XP_222179 | 0.6066963893280481 |
| XP_222180 | 1.0916025837629368 |
| XP_222184 | 1.1856364255311387 |
| XP_222187 | -1                 |
| XP_222190 | -1                 |
| XP_222198 | 1.104091582011695  |
| XP_222212 | 6.125608151489009  |
| XP_222227 | 0.9457833264982308 |
| XP_222228 | 0.7081310757682974 |
| XP_222231 | 7.985574814282482  |
| XP_222242 | 0.9540588884130162 |
| XP_222251 | 0.9169357298373613 |
| XP_222252 | 0.8716846896939092 |

|           |                    |
|-----------|--------------------|
| XP_222253 | 1.1765184760540093 |
| XP_222254 | 1.1161507631328336 |
| XP_222255 | 1.219715710612342  |
| XP_222260 | 1.5256225060323683 |
| XP_222263 | 1.1527065904365104 |
| XP_222267 | 0.9880207795440548 |
| XP_222273 | 0.6905170054942161 |
| XP_222276 | -1                 |
| XP_222287 | 0.8853700776975275 |
| XP_222292 | -1                 |
| XP_222302 | -1                 |
| XP_222331 | 1.1753424561093908 |
| XP_222335 | -1                 |
| XP_222339 | 0.9989093580771997 |
| XP_222370 | 1.573809615223377  |
| XP_222377 | -1                 |
| XP_222382 | 0.966021760964033  |
| XP_222384 | -1                 |
| XP_222392 | -1                 |
| XP_222421 | 1.1139458181805595 |
| XP_222428 | -1                 |
| XP_222442 | 1.082120930390806  |
| XP_222452 | 1.1069678274323564 |
| XP_222453 | 1.0504503025214265 |
| XP_222456 | 0.5704544950394439 |
| XP_222457 | 1.2015005566463202 |
| XP_222460 | 0.9994789622650688 |
| XP_222461 | 1.3151377329125735 |
| XP_222476 | 0.8579129302002659 |
| XP_222499 | 1.104173032635786  |
| XP_222503 | 0.7686321804212315 |
| XP_222520 | 1.10425740224504   |
| XP_222534 | -1                 |
| XP_222538 | 1.0346114551748247 |
| XP_222551 | 0.7955345248208879 |
| XP_222557 | 1.212451497504075  |
| XP_222559 | 0.9378944880110258 |
| XP_222561 | 1.1395998487856878 |
| XP_222564 | -1                 |
| XP_222583 | 1.0914430005321365 |
| XP_222597 | 1.2022475131610764 |
| XP_222609 | 1.274978818647738  |
| XP_222613 | 1.0126777109936986 |
| XP_222618 | -1                 |
| XP_222624 | 1.1253450055005911 |
| XP_222627 | 0.939785261521607  |
| XP_222637 | 0.929093138245565  |
| XP_222662 | 0.8963747927140927 |
| XP_222667 | 1.388739195748153  |
| XP_222675 | 1.1926465278051077 |
| XP_222678 | 1.0722525000700251 |
| XP_222686 | 0.8571652379110039 |
| XP_222693 | 1.0121501936791844 |
| XP_222695 | 0.9904844524101947 |
| XP_222716 | 1.2433060833396228 |
| XP_222745 | 1.4442246123633167 |
| XP_222768 | 1.499037943094353  |
| XP_222769 | 0.8548071442055485 |
| XP_222780 | 0.6333537662316816 |
| XP_222801 | 0.7608653300490724 |
| XP_222804 | 1.045574798782107  |
| XP_222824 | 1.1754209819027561 |



|           |                     |
|-----------|---------------------|
| XP_222828 | 1.4226623115091506  |
| XP_222831 | 1.1016166280938584  |
| XP_222832 | 1.232153976197594   |
| XP_222834 | 1.1268559180702045  |
| XP_222837 | -1                  |
| XP_222849 | 0.9282166645883225  |
| XP_222855 | 1.1016515158493136  |
| XP_222863 | 3.3889601713533684  |
| XP_222868 | 1.133009430553927   |
| XP_222887 | 1.0656280471646107  |
| XP_222897 | 1.3344874805741824  |
| XP_222899 | 0.8144438051369772  |
| XP_222900 | 0.7816184404662025  |
| XP_222902 | 1.1021607460750493  |
| XP_222913 | 0.9329902329925069  |
| XP_222918 | 1.3095046503208783  |
| XP_222920 | 1.101040869878864   |
| XP_222946 | 1.2297970287274302  |
| XP_222952 | 0.7767169297635425  |
| XP_222955 | 3.648886247535365   |
| XP_222958 | -1                  |
| XP_222971 | -1                  |
| XP_222975 | 1.0807303012951832  |
| XP_222991 | 1.1236366124219488  |
| XP_222995 | 1.2910673290848098  |
| XP_223012 | 1.1430425803420081  |
| XP_223014 | 1.3065489682728848  |
| XP_223016 | -1                  |
| XP_223022 | 1.0103713618117247  |
| XP_223053 | 0.8561049358919504  |
| XP_223054 | 1.240660475370286   |
| XP_223057 | 1.1875796326549972  |
| XP_223060 | 0.7865171103975365  |
| XP_223074 | 1.4304404483824211  |
| XP_223075 | 1.3817160436243647  |
| XP_223076 | 0.14315777882862907 |
| XP_223083 | 1.349138374761811   |
| XP_223085 | 0.8043126735315839  |
| XP_223087 | -1                  |
| XP_223090 | 1.3338481970576002  |
| XP_223116 | 1.01239966742583    |
| XP_223121 | -1                  |
| XP_223124 | 1.2078165250909685  |
| XP_223143 | 1.1582755995566218  |
| XP_223146 | 0.5782373429959996  |
| XP_223148 | 0.7940503249130458  |
| XP_223150 | 1.604268912164549   |
| XP_223152 | 1.1939816824021068  |
| XP_223159 | -1                  |
| XP_223174 | 0.9802966089041499  |
| XP_223180 | 1.1335694918955028  |
| XP_223190 | 1.39795276898184    |
| XP_223196 | -1                  |
| XP_223205 | 1.1067999952083962  |
| XP_223209 | -1                  |
| XP_223229 | 0.9747363219209746  |
| XP_223235 | 1.0009589640977488  |
| XP_223237 | 1.1589901953053812  |
| XP_223279 | 1.168579413905847   |
| XP_223290 | 0.9366750334206703  |
| XP_223301 | 1.2978918177820458  |
| XP_223305 | 1.1798511319420557  |

|           |                    |
|-----------|--------------------|
| XP_223310 | 1.0458406630832426 |
| XP_223335 | 1.248213961938333  |
| XP_223338 | -1                 |
| XP_223340 | 1.6593090998630349 |
| XP_223341 | 0.6370349850617019 |
| XP_223350 | 1.2228061958611058 |
| XP_223353 | 0.9898630172574647 |
| XP_223365 | 1.2388758310773853 |
| XP_223378 | -1                 |
| XP_223394 | 1.112426139524873  |
| XP_223397 | 0.8860464225073442 |
| XP_223399 | 0.6260588393972857 |
| XP_223400 | 1.0849025440957785 |
| XP_223406 | 1.0841622210359125 |
| XP_223410 | 0.9275329638426184 |
| XP_223426 | 1.1095376561942558 |
| XP_223434 | 1.3802982508317851 |
| XP_223454 | 1.1596713952817514 |
| XP_223463 | 1.2621621441010193 |
| XP_223469 | 1.1202264713123355 |
| XP_223485 | -1                 |
| XP_223486 | 0.9893954597968335 |
| XP_223494 | 1.3072639485841722 |
| XP_223495 | 1.3717125198361069 |
| XP_223496 | 1.0491973470598541 |
| XP_223508 | 0.9105335047797581 |
| XP_223511 | 1.2520341430083977 |
| XP_223512 | 0.8535270630215859 |
| XP_223515 | -1                 |
| XP_223532 | -1                 |
| XP_223533 | -1                 |
| XP_223536 | 1.250804114095094  |
| XP_223539 | 0.9133846551409314 |
| XP_223541 | 0.7453111978680785 |
| XP_223544 | 1.1518991414106592 |
| XP_223556 | -1                 |
| XP_223560 | 4.331785548555712  |
| XP_223566 | 0.9457554064507642 |
| XP_223580 | 1.0418669451747844 |
| XP_223583 | 3.7201906762429267 |
| XP_223590 | 1.0241090951419742 |
| XP_223591 | 0.7920826934193093 |
| XP_223592 | -1                 |
| XP_223597 | 2.214171496347897  |
| XP_223600 | 0.978745277812551  |
| XP_223611 | 1.3343317974795714 |
| XP_223613 | 1.2342098753607076 |
| XP_223625 | 1.1218173020379676 |
| XP_223640 | 0.9839953621521366 |
| XP_223643 | 1.5013391859328813 |
| XP_223674 | -1                 |
| XP_223680 | 0.9979996619100981 |
| XP_223684 | 1.0701333402795334 |
| XP_223688 | 1.0170560585522843 |
| XP_223710 | -1                 |
| XP_223723 | 0.8598626210690395 |
| XP_223725 | -1                 |
| XP_223745 | 1.3647011780605338 |
| XP_223768 | 1.225402623273867  |
| XP_223775 | 0.7754355396276451 |
| XP_223779 | 0.887617794631996  |
| XP_223785 | 0.7288036362267571 |

|           |                    |
|-----------|--------------------|
| XP_223786 | 0.8239096023543581 |
| XP_223791 | -1                 |
| XP_223792 | -1                 |
| XP_223793 | 0.8151430653245265 |
| XP_223816 | 1.1031954333281198 |
| XP_223820 | -1                 |
| XP_223826 | -1                 |
| XP_223828 | 1.0095667117672134 |
| XP_223876 | 1.119278788089206  |
| XP_223879 | 1.1249718360981762 |
| XP_223897 | -1                 |
| XP_223902 | 1.255049795392343  |
| XP_223905 | 0.8368730521298009 |
| XP_223916 | 1.0581909157882725 |
| XP_223918 | 1.1942573461708241 |
| XP_223930 | 1.2105816985721123 |
| XP_223937 | 1.164204205211006  |
| XP_223938 | 1.045393187489991  |
| XP_223969 | -1                 |
| XP_223974 | -1                 |
| XP_223975 | 0.9614741131278216 |
| XP_223980 | 1.0528778552872549 |
| XP_223981 | 1.0917071799826858 |
| XP_223984 | 1.2439907037672082 |
| XP_223991 | 1.345891060664709  |
| XP_224000 | 1.4696370567071373 |
| XP_224011 | 1.9436691022199313 |
| XP_224014 | 1.1255262710674667 |
| XP_224023 | 1.2320163704986142 |
| XP_224084 | 0.7647757313834501 |
| XP_224103 | 1.5363574276689658 |
| XP_224131 | 0.78789623970233   |
| XP_224143 | -1                 |
| XP_224165 | 0.9291678684815202 |
| XP_224172 | 1.2548755776832183 |
| XP_224173 | 1.8698456404908264 |
| XP_224181 | 1.0501679546066438 |
| XP_224184 | 1.0717786679723627 |
| XP_224186 | -1                 |
| XP_224190 | 0.7822613630684382 |
| XP_224197 | 1.4982565544543154 |
| XP_224209 | 1.1471718779002786 |
| XP_224231 | 1.1745564056173265 |
| XP_224248 | 0.9925281766449018 |
| XP_224256 | 1.4940089179784517 |
| XP_224270 | 0.7194682545466584 |
| XP_224282 | 0.6947477899889107 |
| XP_224283 | 1.0055419285306026 |
| XP_224288 | 1.6598050956134096 |
| XP_224295 | 0.7296513211190107 |
| XP_224297 | -1                 |
| XP_224308 | 1.499727244516409  |
| XP_224325 | 1.1536018640611114 |
| XP_224334 | -1                 |
| XP_224344 | 0.7945767379764112 |
| XP_224348 | 1.0957683936176794 |
| XP_224354 | 0.8677797021187422 |
| XP_224366 | 1.425952571092228  |
| XP_224400 | 1.5697902410843243 |
| XP_224409 | 0.950666721946872  |
| XP_224417 | 0.8337984825588628 |
| XP_224429 | 0.9370707948042707 |

|           |                    |
|-----------|--------------------|
| XP_224440 | 0.9820470020535362 |
| XP_224449 | 1.3900425936700938 |
| XP_224465 | 0.9375695140183365 |
| XP_224478 | 1.1161352896151722 |
| XP_224480 | 1.7141960740518998 |
| XP_224489 | 1.0071255081228003 |
| XP_224515 | 0.8138887216953545 |
| XP_224518 | 0.3135796118457467 |
| XP_224519 | 1.1505240072847973 |
| XP_224521 | 1.128337032209809  |
| XP_224525 | 2.1946221636567786 |
| XP_224534 | 1.2211014767428574 |
| XP_224535 | 1.344972535677838  |
| XP_224538 | 1.0753820684815458 |
| XP_224551 | 0.914693121954001  |
| XP_224561 | 1.052085670721273  |
| XP_224583 | 12.832548479358676 |
| XP_224584 | 1.2500524162332098 |
| XP_224604 | 1.3356877082375787 |
| XP_224614 | 0.8342754745004415 |
| XP_224618 | 1.039556939024638  |
| XP_224620 | 0.874399695327082  |
| XP_224627 | -1                 |
| XP_224630 | 0.8030053359894155 |
| XP_224637 | 0.800237540556696  |
| XP_224639 | 0.8834918013809001 |
| XP_224643 | 0.8766754824622446 |
| XP_224646 | -1                 |
| XP_224672 | 1.0161938790164862 |
| XP_224673 | -1                 |
| XP_224680 | 0.9000006236528448 |
| XP_224706 | 1.0710403786446616 |
| XP_224707 | 1.0971681408888412 |
| XP_224708 | 1.206667583824562  |
| XP_224712 | -1                 |
| XP_224713 | -1                 |
| XP_224715 | 1.2504889768825225 |
| XP_224718 | 0.8816381113153504 |
| XP_224722 | 0.8795774411217728 |
| XP_224724 | 1.345252057859564  |
| XP_224728 | 0.9264929908212314 |
| XP_224729 | 1.1661314654049264 |
| XP_224733 | 0.9750285468199351 |
| XP_224739 | -1                 |
| XP_224741 | 1.1399190759656672 |
| XP_224762 | 0.9560490677664326 |
| XP_224778 | 1.2626905021793668 |
| XP_224781 | 1.1394271227658173 |
| XP_224783 | 1.2053624630276791 |
| XP_224784 | 0.7528285682588861 |
| XP_224814 | 1.3059054879498202 |
| XP_224826 | 1.3865736859193047 |
| XP_224839 | 1.3634418688298955 |
| XP_224847 | 0.9744295071027355 |
| XP_224853 | 0.9897629845303076 |
| XP_224859 | 1.026166684811684  |
| XP_224861 | 0.8302585810465367 |
| XP_224872 | -1                 |
| XP_224892 | 1.0196634311362134 |
| XP_224894 | 1.0663349606353982 |
| XP_224908 | -1                 |
| XP_224910 | 1.2022432475319762 |

|           |                     |
|-----------|---------------------|
| XP_224923 | 0.9022293166737736  |
| XP_224926 | 1.2794399309738291  |
| XP_224929 | 0.8527706522473113  |
| XP_224930 | 0.8494213206888416  |
| XP_224934 | 1.468079306240928   |
| XP_224940 | 1.109371585895061   |
| XP_224944 | 1.1943628597618476  |
| XP_224948 | 1.036519929840132   |
| XP_224952 | 1.267944180747141   |
| XP_224954 | 1.0197405393923844  |
| XP_224961 | 3.848901386751166   |
| XP_224964 | 1.3866594491825435  |
| XP_224979 | -1                  |
| XP_225006 | 0.9663491487108652  |
| XP_225008 | 1.0357541333727676  |
| XP_225020 | 2.8684426546631054  |
| XP_225027 | 1.058409020199477   |
| XP_225039 | 1.4124678796732575  |
| XP_225043 | 0.6972880500583583  |
| XP_225044 | 1.3990777883772907  |
| XP_225052 | 0.8489580297990303  |
| XP_225063 | 0.9344840706577046  |
| XP_225068 | -1                  |
| XP_225077 | 1.1596013824413713  |
| XP_225078 | 1.106144830757991   |
| XP_225086 | 0.8023888589739206  |
| XP_225101 | -1                  |
| XP_225104 | -1                  |
| XP_225111 | 0.925832746925301   |
| XP_225125 | 0.8916354161666762  |
| XP_225137 | 2.023292096736752   |
| XP_225138 | 0.8427651045943197  |
| XP_225142 | 1.3331097409887889  |
| XP_225143 | 1.448879479939141   |
| XP_225147 | 2.4514818822072124  |
| XP_225150 | 1.215045105095579   |
| XP_225159 | 0.9474027100770365  |
| XP_225168 | 1.0672934191144279  |
| XP_225169 | -1                  |
| XP_225170 | 1.212441218121146   |
| XP_225176 | 1.008342183943077   |
| XP_225178 | 0.5715355727890459  |
| XP_225188 | -1                  |
| XP_225198 | 0.11854113368568757 |
| XP_225203 | 1.2731808255997377  |
| XP_225204 | 1.0358624860086687  |
| XP_225206 | -1                  |
| XP_225211 | -1                  |
| XP_225220 | 1.2619217401518794  |
| XP_225227 | 1.1876792786874009  |
| XP_225229 | 1.0994878672007404  |
| XP_225233 | 0.8100475397378727  |
| XP_225238 | 1.2647267977903722  |
| XP_225241 | 1.2401025605640135  |
| XP_225250 | -1                  |
| XP_225253 | 0.9730256191083131  |
| XP_225259 | 1.0911695631856244  |
| XP_225307 | -1                  |
| XP_225319 | 0.6228381215536893  |
| XP_225322 | 1.2040111393395165  |
| XP_225332 | 0.7772353016638358  |
| XP_225336 | 1.16823605477699    |

|           |                    |
|-----------|--------------------|
| XP_225342 | 0.5128488680651685 |
| XP_225346 | 0.9212249932552906 |
| XP_225368 | 1.2501894907882787 |
| XP_225376 | 0.8462552376753503 |
| XP_225379 | 1.7986820235478083 |
| XP_225396 | 0.9097978648581152 |
| XP_225404 | 0.8549942435843665 |
| XP_225411 | 1.0629872086867687 |
| XP_225436 | 1.0690555733808516 |
| XP_225447 | 0.9595329442498869 |
| XP_225457 | 2.08141330342928   |
| XP_225472 | 1.222808163191717  |
| XP_225491 | 1.3005428289325822 |
| XP_225512 | 1.0038116277473945 |
| XP_225526 | 1.1707709818143133 |
| XP_225538 | 1.219199107265673  |
| XP_225556 | -1                 |
| XP_225559 | -1                 |
| XP_225570 | 0.933569959179387  |
| XP_225585 | 1.4538190700659879 |
| XP_225586 | 0.9151335138556645 |
| XP_225599 | 0.9879564788464744 |
| XP_225600 | 1.1219535123916329 |
| XP_225603 | 1.0195837374380805 |
| XP_225610 | 1.2276533947540513 |
| XP_225625 | 0.78770834356465   |
| XP_225630 | -1                 |
| XP_225631 | 1.1289714526810768 |
| XP_225635 | 1.0466931330250475 |
| XP_225644 | -1                 |
| XP_225658 | -1                 |
| XP_225659 | 1.3954030999966687 |
| XP_225667 | 0.9202458455744049 |
| XP_225679 | 0.9264117703932868 |
| XP_225680 | 1.2246575413247096 |
| XP_225685 | 0.7707742657568049 |
| XP_225695 | 0.9101219562704794 |
| XP_225698 | -1                 |
| XP_225706 | 1.1002289954865074 |
| XP_225707 | 1.3592307648176993 |
| XP_225711 | 0.830980111468964  |
| XP_225713 | 2.3680883259658905 |
| XP_225717 | 1.0667692091034833 |
| XP_225718 | -1                 |
| XP_225730 | 0.8098439628295995 |
| XP_225732 | 0.9983531058707105 |
| XP_225735 | -1                 |
| XP_225744 | 1.3276292506035237 |
| XP_225748 | 0.912589809819071  |
| XP_225755 | 1.2886132523412772 |
| XP_225760 | 1.1634798244067037 |
| XP_225768 | 1.1694228047662667 |
| XP_225770 | 1.201619088808284  |
| XP_225838 | 1.3322382192509035 |
| XP_225856 | -1                 |
| XP_225862 | 1.1973813221268177 |
| XP_225867 | 0.6033087681316069 |
| XP_225882 | -1                 |
| XP_225885 | 0.9854382283933548 |
| XP_225897 | 1.4042567635270093 |
| XP_225909 | 0.5012141597279579 |
| XP_225923 | 1.1015315819690905 |

|           |                    |
|-----------|--------------------|
| XP_225966 | -1                 |
| XP_225972 | 0.9245451435339733 |
| XP_225981 | 0.9008481399680814 |
| XP_225997 | 0.9911690747782417 |
| XP_225999 | 0.6810826593531193 |
| XP_226005 | 1.002089649691366  |
| XP_226007 | 0.8716951259468594 |
| XP_226008 | 1.1314269090518387 |
| XP_226009 | 0.9653155919006878 |
| XP_226014 | 1.2531246251267705 |
| XP_226016 | 1.594883666179511  |
| XP_226027 | 0.9086565808910567 |
| XP_226032 | 1.200965084959696  |
| XP_226046 | 1.535699393798773  |
| XP_226056 | 2.2569648983966424 |
| XP_226060 | 1.4908023966982569 |
| XP_226070 | 1.0953202885893403 |
| XP_226071 | 1.0825044793626004 |
| XP_226098 | 0.7892132104721193 |
| XP_226107 | 1.0205562650122697 |
| XP_226109 | -1                 |
| XP_226112 | 1.229602520657382  |
| XP_226118 | 1.2936300934117329 |
| XP_226119 | 1.252132045911136  |
| XP_226121 | 1.363073390849217  |
| XP_226123 | -1                 |
| XP_226158 | 0.8131884924073645 |
| XP_226159 | 0.7675781189300351 |
| XP_226162 | 0.7382120012509988 |
| XP_226165 | -1                 |
| XP_226175 | 1.1096308191542814 |
| XP_226178 | -1                 |
| XP_226203 | -1                 |
| XP_226209 | 1.415899055815393  |
| XP_226210 | 0.7901689278896619 |
| XP_226211 | -1                 |
| XP_226233 | 0.9619607026974053 |
| XP_226237 | 1.0257773898067726 |
| XP_226238 | 0.8132827211931898 |
| XP_226315 | 1.059051744939194  |
| XP_226329 | 0.8567911571192817 |
| XP_226330 | 0.938669456689599  |
| XP_226331 | 1.0197186279564168 |
| XP_226343 | 1.0545199731474153 |
| XP_226349 | 1.0638756022613975 |
| XP_226362 | 1.0407929540272363 |
| XP_226369 | 1.1846209196255377 |
| XP_226380 | 0.8558061391456984 |
| XP_226381 | 1.0043093402996648 |
| XP_226388 | 1.431630737987924  |
| XP_226390 | 1.5969676930312051 |
| XP_226402 | 1.4214337512491557 |
| XP_226408 | 1.103712572400215  |
| XP_226416 | 1.213221910311539  |
| XP_226417 | -1                 |
| XP_226449 | 0.883972696565932  |
| XP_226462 | -1                 |
| XP_226464 | 1.0101444506196016 |
| XP_226489 | 1.2657782512542466 |
| XP_226493 | 0.9148952939652473 |
| XP_226517 | 1.0135474603718435 |
| XP_226521 | 2.799251876145237  |

|           |                    |
|-----------|--------------------|
| XP_226522 | -1                 |
| XP_226528 | 0.7798230815540375 |
| XP_226533 | 0.9503273098639856 |
| XP_226544 | 1.0471311684060625 |
| XP_226545 | 1.2116781323463663 |
| XP_226546 | 1.1857349024753008 |
| XP_226547 | 1.1012745703301972 |
| XP_226548 | 1.2034008633250548 |
| XP_226553 | 1.9839350802385087 |
| XP_226569 | 0.9459896341892722 |
| XP_226570 | 1.109110595572726  |
| XP_226571 | 0.7663311181113314 |
| XP_226572 | 2.1662154093593564 |
| XP_226578 | 1.0372167974226238 |
| XP_226582 | 0.9095226546144385 |
| XP_226604 | 0.9918888445030557 |
| XP_226606 | 1.2484690593733458 |
| XP_226624 | 1.1293251803371327 |
| XP_226639 | 1.1301899039133156 |
| XP_226652 | 1.2500936493522128 |
| XP_226666 | 1.1224830212732788 |
| XP_226679 | 1.3297698590188889 |
| XP_226696 | 1.1035140391339768 |
| XP_226700 | 1.2349507336768177 |
| XP_226703 | 1.2721312295289156 |
| XP_226715 | 0.8075497557908715 |
| XP_226716 | 0.9957283022057256 |
| XP_226718 | 1.6191609968404777 |
| XP_226722 | 1.035517607613003  |
| XP_226731 | 1.0971490320205557 |
| XP_226732 | 1.1538533617491271 |
| XP_226733 | -1                 |
| XP_226738 | 1.094888996248934  |
| XP_226759 | 1.9070540139749692 |
| XP_226768 | 0.9163700291193503 |
| XP_226769 | 0.9716157278102652 |
| XP_226771 | 1.0892101895760542 |
| XP_226789 | 1.0030287823285604 |
| XP_226790 | 1.203891958066743  |
| XP_226798 | 0.715001779527865  |
| XP_226803 | -1                 |
| XP_226804 | 1.738868120356411  |
| XP_226812 | 1.2629192754646867 |
| XP_226813 | 1.1780414636771839 |
| XP_226833 | -1                 |
| XP_226834 | 1.1467931389557682 |
| XP_226835 | 0.8425737519670818 |
| XP_226837 | -1                 |
| XP_226839 | 1.2106581398319711 |
| XP_226842 | 0.8529824980768823 |
| XP_226843 | 1.1777592763198463 |
| XP_226853 | 1.3094623748654024 |
| XP_226858 | 0.9946194452725575 |
| XP_226874 | 1.133945191638734  |
| XP_226888 | 0.8228338444017855 |
| XP_226897 | 0.9666455373588888 |
| XP_226909 | 0.9508419356412499 |
| XP_226922 | -1                 |
| XP_226939 | 0.8384229644354767 |
| XP_226945 | 1.288350360779494  |
| XP_226952 | 0.9951924534281122 |
| XP_226953 | -1                 |



|           |                    |
|-----------|--------------------|
| XP_226957 | 0.9790710836250297 |
| XP_226964 | 0.7997426734868909 |
| XP_226973 | 1.1177282872646186 |
| XP_226976 | 0.9972235436180955 |
| XP_226980 | 1.2344483243511932 |
| XP_226987 | 1.2425961976662347 |
| XP_226988 | 1.0031775965930056 |
| XP_227009 | 0.9287746753800868 |
| XP_227021 | 1.1627093138610387 |
| XP_227030 | 1.1896914044126055 |
| XP_227050 | -1                 |
| XP_227060 | 1.0433917179036623 |
| XP_227064 | 0.9117350751690486 |
| XP_227066 | 1.2831047065137144 |
| XP_227072 | 1.0906473253610207 |
| XP_227074 | 0.9455376041633952 |
| XP_227080 | 0.6533780163955535 |
| XP_227081 | 1.9328474474340263 |
| XP_227084 | 1.1424211052471676 |
| XP_227088 | -1                 |
| XP_227089 | 0.9972860658378444 |
| XP_227117 | -1                 |
| XP_227131 | 2.0600531846404304 |
| XP_227132 | 1.0091520694823544 |
| XP_227134 | 1.0626483964659348 |
| XP_227140 | 1.134826854651146  |
| XP_227142 | 0.096099364833102  |
| XP_227148 | 1.408318236205828  |
| XP_227155 | 1.211551715331539  |
| XP_227163 | 1.3266941925457116 |
| XP_227168 | 0.5871295725172633 |
| XP_227177 | 1.193932719512955  |
| XP_227201 | 2.2418715538133993 |
| XP_227208 | 0.9653787032642508 |
| XP_227232 | 1.05632950224092   |
| XP_227234 | 1.063051404688125  |
| XP_227247 | 0.8630663831670113 |
| XP_227248 | 0.7089666896063566 |
| XP_227282 | 0.9689657601411126 |
| XP_227287 | 1.0057012300971107 |
| XP_227313 | 1.1689274064939248 |
| XP_227339 | 1.7063713520531254 |
| XP_227351 | 0.8860557265851775 |
| XP_227367 | 0.896481762676812  |
| XP_227369 | 0.8030601701734902 |
| XP_227371 | 1.0655265711928739 |
| XP_227385 | 0.8833360236215687 |
| XP_227389 | 1.209247339839077  |
| XP_227396 | 0.6673239387438774 |
| XP_227399 | 1.951491834193319  |
| XP_227404 | -1                 |
| XP_227405 | 1.179296090704989  |
| XP_227412 | 1.2950282233368693 |
| XP_227413 | 0.9475963256507355 |
| XP_227420 | -1                 |
| XP_227427 | 0.9997751921768518 |
| XP_227428 | 1.042271244952793  |
| XP_227429 | 1.0404601861825131 |
| XP_227440 | 1.0538715318984297 |
| XP_227443 | 1.3800817834804988 |
| XP_227446 | 1.148424565278974  |
| XP_227448 | 1.0320672474413692 |

|           |                    |
|-----------|--------------------|
| XP_227451 | 4.768952761840539  |
| XP_227462 | -1                 |
| XP_227469 | 0.959161341720345  |
| XP_227480 | 1.1157194075240675 |
| XP_227483 | 1.1929417933348616 |
| XP_227484 | 1.0167115783371206 |
| XP_227489 | -1                 |
| XP_227490 | 0.7834131656533584 |
| XP_227491 | -1                 |
| XP_227510 | 1.0416958822452436 |
| XP_227516 | 1.1467983832923907 |
| XP_227525 | 1.6589913971704926 |
| XP_227535 | 0.4028671462717524 |
| XP_227538 | 1.2154441242273941 |
| XP_227540 | -1                 |
| XP_227543 | 1.8573801055775523 |
| XP_227547 | 1.167017373068093  |
| XP_227549 | 0.9262744318657196 |
| XP_227571 | 0.9068488226671733 |
| XP_227577 | -1                 |
| XP_227581 | 1.1139059126237971 |
| XP_227583 | 0.9254819476246916 |
| XP_227584 | -1                 |
| XP_227591 | 0.545309009047576  |
| XP_227598 | 1.026968699953161  |
| XP_227605 | 1.0896089994573923 |
| XP_227620 | 1.370550502401249  |
| XP_227623 | -1                 |
| XP_227624 | 1.3498957953225987 |
| XP_227651 | 1.3578952799789026 |
| XP_227657 | 1.5475784985992673 |
| XP_227663 | 1.1735739043933773 |
| XP_227665 | 1.1659440970976984 |
| XP_227679 | 1.0424107760314314 |
| XP_227686 | 0.8687175497024182 |
| XP_227690 | 0.848129834118004  |
| XP_227694 | 1.1958271223671464 |
| XP_227701 | 1.2266935133630044 |
| XP_227735 | 1.2312045402789893 |
| XP_227745 | 1.3457961921826171 |
| XP_227762 | -1                 |
| XP_227765 | 0.905321967705791  |
| XP_227786 | 1.3106699936674049 |
| XP_227795 | -1                 |
| XP_227828 | 2.5660666278978606 |
| XP_227870 | 0.9284242804184782 |
| XP_227873 | 1.4118548092090577 |
| XP_227877 | 0.8894172321534898 |
| XP_227882 | 1.037507672883313  |
| XP_227896 | -1                 |
| XP_227907 | 1.0302597142703975 |
| XP_227921 | 1.1950526693657189 |
| XP_227929 | -1                 |
| XP_227945 | 0.9866242416445893 |
| XP_227971 | 1.448454617853912  |
| XP_227978 | 0.956571163536156  |
| XP_227983 | 1.100806759547865  |
| XP_227989 | -1                 |
| XP_227992 | 1.228846246479837  |
| XP_228005 | 0.8287340723331306 |
| XP_228014 | 1.2620326665924886 |
| XP_228016 | 1.3848772198582069 |

|           |                     |
|-----------|---------------------|
| XP_228029 | 1.215872407453309   |
| XP_228030 | 1.1203133582545555  |
| XP_228032 | 1.2940569950953311  |
| XP_228038 | 0.8815342778203187  |
| XP_228043 | 0.8360878939029713  |
| XP_228046 | 0.9055943892024093  |
| XP_228059 | 0.5622731820478813  |
| XP_228063 | 0.9737990136003961  |
| XP_228068 | -1                  |
| XP_228072 | 0.8678115629733125  |
| XP_228073 | 0.7255487701676716  |
| XP_228082 | 0.9973642978484072  |
| XP_228091 | 2.667574835395521   |
| XP_228122 | 1.0624146698487351  |
| XP_228137 | -1                  |
| XP_228147 | 1.1834657506243744  |
| XP_228149 | 1.6656168862181735  |
| XP_228158 | 1.1700784361870225  |
| XP_228159 | 1.0664576546381868  |
| XP_228164 | 0.7633951455279228  |
| XP_228196 | 1.4066602653903668  |
| XP_228197 | 1.5524452300208098  |
| XP_228202 | 2.3014412114516714  |
| XP_228209 | 6.409673489536046   |
| XP_228242 | 1.8045135310823497  |
| XP_228273 | 1.4463892004410492  |
| XP_228301 | 1.045368160852754   |
| XP_228305 | 1.022817949082385   |
| XP_228320 | 0.42438561793859136 |
| XP_228329 | 0.6292257678499271  |
| XP_228360 | 0.35065563193209565 |
| XP_228363 | 0.9593161208453495  |
| XP_228392 | 1.2175016942496282  |
| XP_228394 | -1                  |
| XP_228424 | 2.1362558191731456  |
| XP_228426 | 1.0432343989214183  |
| XP_228432 | -1                  |
| XP_228441 | 1.008055520541048   |
| XP_228444 | 0.2803730145603655  |
| XP_228447 | 0.7775440828638128  |
| XP_228448 | 0.9875432099176153  |
| XP_228455 | 1.0972495418361885  |
| XP_228457 | 1.1143548431490224  |
| XP_228475 | 1.0331148927498548  |
| XP_228482 | -1                  |
| XP_228493 | 0.9707330655108751  |
| XP_228499 | 0.9349497951094817  |
| XP_228500 | 1.014086614177573   |
| XP_228501 | 1.314236819681731   |
| XP_228518 | 0.12472240412611264 |
| XP_228520 | 0.9423721036758836  |
| XP_228522 | 1.125329405151516   |
| XP_228536 | 0.9803762043016677  |
| XP_228540 | 0.611330239943479   |
| XP_228541 | 0.792525444456918   |
| XP_228548 | 1.0060765214622687  |
| XP_228551 | -1                  |
| XP_228553 | -1                  |
| XP_228556 | 1.086323335239305   |
| XP_228590 | -1                  |
| XP_228607 | 1.1973609928092561  |
| XP_228615 | 0.9232221192381517  |

|           |                     |
|-----------|---------------------|
| XP_228623 | 1.2159199598321158  |
| XP_228644 | 1.1877340211102958  |
| XP_228661 | 1.177695247757436   |
| XP_228670 | -1                  |
| XP_228683 | 0.8758346293317003  |
| XP_228696 | 1.2355742134958743  |
| XP_228708 | -1                  |
| XP_228733 | 0.7006500605870252  |
| XP_228753 | 0.4657029382380501  |
| XP_228758 | 0.848357391924064   |
| XP_228759 | 0.7153294143158115  |
| XP_228760 | 1.1396479941458215  |
| XP_228761 | 1.019798840247007   |
| XP_228769 | 0.9497756073211033  |
| XP_228770 | 1.1246027348098089  |
| XP_228771 | 1.1658566253657627  |
| XP_228776 | 1.165787358289476   |
| XP_228777 | 0.9731670269818871  |
| XP_228778 | 2.1042246628350814  |
| XP_228781 | 0.7077010312806776  |
| XP_228786 | 1.284609372100319   |
| XP_228797 | 1.1867137950358715  |
| XP_228801 | 0.7101712619741395  |
| XP_228809 | 0.7317897605362891  |
| XP_228810 | 0.9483818965623358  |
| XP_228818 | 0.9783275883168674  |
| XP_228841 | -1                  |
| XP_228848 | 0.8713143992611379  |
| XP_228858 | 0.9249781940603987  |
| XP_228861 | 0.7994637757993175  |
| XP_228862 | 1.1001318443374368  |
| XP_228865 | 0.9345928401432273  |
| XP_228867 | -1                  |
| XP_228876 | 1.17928681961268    |
| XP_228906 | 0.9103089421613259  |
| XP_228909 | 1.0516902858004864  |
| XP_228914 | 1.3348933123423545  |
| XP_228942 | 1.0979411738134024  |
| XP_228943 | 0.8480875572293348  |
| XP_228973 | 1.0895001135325415  |
| XP_229025 | 0.7683766274830249  |
| XP_229026 | -1                  |
| XP_229030 | 1.015915883555444   |
| XP_229036 | 1.0593320127158692  |
| XP_229038 | 1.1771079946428211  |
| XP_229065 | 0.8045439536217939  |
| XP_229087 | 0.821444344863      |
| XP_229096 | 1.0076312247555534  |
| XP_229106 | 0.8318138466055052  |
| XP_229110 | 1.0170638384795683  |
| XP_229114 | 0.48273816367882394 |
| XP_229122 | 1.8391889706152744  |
| XP_229131 | -1                  |
| XP_229140 | 1.3248316503080315  |
| XP_229146 | 1.7657548415058142  |
| XP_229152 | 0.9457147467806298  |
| XP_229162 | 2.789825409635617   |
| XP_229173 | 0.9991007677671208  |
| XP_229192 | -1                  |
| XP_229201 | 0.7408866928578698  |
| XP_229225 | 1.4714476467189486  |
| XP_229227 | 0.3462117581809225  |

|           |                    |
|-----------|--------------------|
| XP_229231 | 1.1177965975884538 |
| XP_229267 | 1.167657933418062  |
| XP_229276 | 1.232571141506736  |
| XP_229336 | 0.9801089493279899 |
| XP_229338 | 1.1131538966636034 |
| XP_229347 | -1                 |
| XP_229361 | 0.6943323320128937 |
| XP_229383 | -1                 |
| XP_229399 | 1.5000892649388882 |
| XP_229475 | 0.8599052866313557 |
| XP_229481 | 1.1858204183618128 |
| XP_229490 | 0.8427155480786533 |
| XP_229548 | 1.3455649905798148 |
| XP_229759 | 1.4231537326303592 |
| XP_229770 | -1                 |
| XP_229918 | 0.9805176444823558 |
| XP_229925 | 0.5230615331495683 |
| XP_229935 | -1                 |
| XP_229936 | 1.4897325097261989 |
| XP_229944 | 1.3724834036485731 |
| XP_229959 | -1                 |
| XP_229977 | 0.9622741777384561 |
| XP_229979 | 1.3470186402821118 |
| XP_229981 | -1                 |
| XP_229988 | -1                 |
| XP_230003 | 1.287314358076656  |
| XP_230007 | 1.4129443175742304 |
| XP_230015 | 0.8276622138455724 |
| XP_230029 | -1                 |
| XP_230033 | 0.5415058552135853 |
| XP_230038 | 1.439447133082551  |
| XP_230039 | 0.8630130722361575 |
| XP_230047 | 0.8004093046229913 |
| XP_230055 | 0.7203950920057548 |
| XP_230070 | 0.8001009680974059 |
| XP_230077 | 1.241729958423709  |
| XP_230084 | 0.9671131252799446 |
| XP_230093 | 1.365038713447215  |
| XP_230118 | 1.2168838283355536 |
| XP_230140 | 1.1228004724424745 |
| XP_230146 | 1.727582156222131  |
| XP_230169 | 0.9917949871933617 |
| XP_230183 | 1.1405257103116775 |
| XP_230213 | 1.1907225529329994 |
| XP_230214 | 1.4667855061004176 |
| XP_230225 | 1.3262785296018598 |
| XP_230226 | 0.6363652315519971 |
| XP_230228 | 0.7187529180250433 |
| XP_230248 | -1                 |
| XP_230269 | 2.1229182841055043 |
| XP_230275 | 1.5596107479354575 |
| XP_230276 | 1.221860931277605  |
| XP_230278 | 1.337398629272096  |
| XP_230279 | 1.1160692887110517 |
| XP_230282 | 0.9666725027099465 |
| XP_230283 | -1                 |
| XP_230284 | 1.1263631617224905 |
| XP_230297 | -1                 |
| XP_230303 | 0.5998407900391864 |
| XP_230306 | -1                 |
| XP_230307 | 1.1218669745514847 |
| XP_230327 | 1.067601002094605  |

|           |                    |
|-----------|--------------------|
| XP_230346 | 1.4121072678414974 |
| XP_230348 | 1.0311310452340587 |
| XP_230356 | 0.9001397808813213 |
| XP_230377 | -1                 |
| XP_230389 | 0.9643078178936378 |
| XP_230399 | 0.8577399664191617 |
| XP_230402 | 1.09704324386951   |
| XP_230457 | 0.9479552955501948 |
| XP_230462 | 0.9169777035294695 |
| XP_230464 | -1                 |
| XP_230465 | 0.8666923539659364 |
| XP_230467 | 1.0504758384946054 |
| XP_230468 | 1.4039599448253883 |
| XP_230471 | -1                 |
| XP_230472 | 0.6499744610093965 |
| XP_230473 | 2.753033948160692  |
| XP_230478 | 2.0053762021161625 |
| XP_230479 | -1                 |
| XP_230480 | 1.0805133093453791 |
| XP_230486 | 1.2270585797812428 |
| XP_230488 | -1                 |
| XP_230491 | 0.9758778717888895 |
| XP_230493 | 1.009622695284416  |
| XP_230494 | -1                 |
| XP_230495 | 0.7154510028326079 |
| XP_230497 | 0.9736642166552995 |
| XP_230500 | 0.8262799414415193 |
| XP_230519 | 0.369032631473555  |
| XP_230520 | -1                 |
| XP_230531 | 0.9939411159139346 |
| XP_230532 | 0.9393683826161335 |
| XP_230537 | -1                 |
| XP_230548 | 1.1773193263001998 |
| XP_230550 | 0.9152861185681216 |
| XP_230555 | 1.4889368364941225 |
| XP_230557 | 0.8602519591626319 |
| XP_230561 | 1.322194821741158  |
| XP_230564 | 0.2751799974907924 |
| XP_230567 | 0.6794358583321943 |
| XP_230568 | -1                 |
| XP_230578 | -1                 |
| XP_230583 | 1.1201939238972245 |
| XP_230584 | 1.63807649550072   |
| XP_230589 | 0.8785057645462592 |
| XP_230592 | -1                 |
| XP_230598 | 1.4577277404228886 |
| XP_230604 | 1.279075362068211  |
| XP_230608 | 1.1855234156863328 |
| XP_230616 | 0.838678998958783  |
| XP_230625 | 0.9267816252562274 |
| XP_230634 | 1.089492274696111  |
| XP_230635 | -1                 |
| XP_230637 | 1.0180464142919816 |
| XP_230638 | 0.8784827818007684 |
| XP_230641 | 1.0308568943552632 |
| XP_230644 | 1.0331157088013123 |
| XP_230647 | 2.2396574926065127 |
| XP_230654 | 1.1491735921420616 |
| XP_230663 | -1                 |
| XP_230701 | 1.0528511845101798 |
| XP_230715 | -1                 |
| XP_230716 | 1.2442533622049101 |

|           |                    |
|-----------|--------------------|
| XP_230719 | 0.8509125962185807 |
| XP_230723 | 1.0463545539213928 |
| XP_230734 | 1.625681576955585  |
| XP_230740 | 3.716765847712579  |
| XP_230750 | 1.1271569242144175 |
| XP_230758 | 1.1503272899468842 |
| XP_230765 | 1.2314237077570278 |
| XP_230770 | 1.2017297551230797 |
| XP_230774 | 1.0827798623267795 |
| XP_230778 | 1.0636559752795576 |
| XP_230784 | -1                 |
| XP_230785 | 1.2728280065544981 |
| XP_230793 | 1.16441363370516   |
| XP_230795 | 1.2957980470785653 |
| XP_230798 | 0.9347099737834048 |
| XP_230799 | 1.0250364458118573 |
| XP_230802 | 1.402761370501904  |
| XP_230814 | 0.8854830084905918 |
| XP_230837 | 2.0322118166832945 |
| XP_230844 | 0.9369464976794019 |
| XP_230845 | 1.1177864613634936 |
| XP_230846 | 1.1645282525620355 |
| XP_230848 | -1                 |
| XP_230849 | 0.9626730330275023 |
| XP_230854 | -1                 |
| XP_230856 | 1.2386885316892395 |
| XP_230860 | 0.8894671300329134 |
| XP_230861 | 1.3604710362980483 |
| XP_230869 | 1.1253871386214138 |
| XP_230874 | -1                 |
| XP_230877 | 1.2227717755729655 |
| XP_230878 | 0.9008319245674462 |
| XP_230880 | 1.223585591035132  |
| XP_230881 | 0.7298504861496905 |
| XP_230890 | 1.217258538420211  |
| XP_230892 | 0.7566930734879477 |
| XP_230899 | 2.228376670406386  |
| XP_230900 | 1.0880465136008375 |
| XP_230940 | 1.1517985734857787 |
| XP_230952 | 1.290528194131779  |
| XP_230955 | 1.2085319002313402 |
| XP_230961 | 1.2092863375559868 |
| XP_230967 | 0.8297444264007074 |
| XP_230968 | 0.8672104906154502 |
| XP_230973 | 1.087909960423878  |
| XP_230982 | 1.024121461518882  |
| XP_230983 | 1.1849581999749692 |
| XP_230986 | 1.0623422940610148 |
| XP_230988 | 1.0234392127913867 |
| XP_230990 | 0.9456924124746829 |
| XP_231003 | 0.7609749651747705 |
| XP_231032 | 0.941649483677632  |
| XP_231041 | -1                 |
| XP_231046 | 0.9477578555693628 |
| XP_231047 | 1.2525556424110258 |
| XP_231055 | -1                 |
| XP_231069 | -1                 |
| XP_231083 | 1.0551895789839933 |
| XP_231085 | 3.695549735898633  |
| XP_231090 | 1.1469340061420428 |
| XP_231115 | 1.49430379366354   |
| XP_231118 | -1                 |

|           |                    |
|-----------|--------------------|
| XP_231121 | 0.7998528988594797 |
| XP_231122 | 0.8414436640336742 |
| XP_231133 | -1                 |
| XP_231135 | 1.1238541929451193 |
| XP_231139 | 1.1333064151275294 |
| XP_231144 | 1.0993421641205472 |
| XP_231147 | 1.163887209228363  |
| XP_231148 | 0.6276944451338907 |
| XP_231153 | 1.3617396781506905 |
| XP_231161 | 0.988274519982396  |
| XP_231165 | 1.7321993819797326 |
| XP_231168 | 1.1354718801169301 |
| XP_231172 | 1.1951484718908565 |
| XP_231184 | -1                 |
| XP_231192 | 0.7305850331024687 |
| XP_231193 | 1.2345623392953051 |
| XP_231214 | 1.1030585082829305 |
| XP_231220 | 1.0729332539244296 |
| XP_231230 | 0.7601775152798308 |
| XP_231245 | -1                 |
| XP_231251 | 1.417320028984294  |
| XP_231271 | 1.475559020158433  |
| XP_231276 | -1                 |
| XP_231279 | 1.1024084744986202 |
| XP_231287 | 1.0357348772103796 |
| XP_231295 | 1.0796896705546126 |
| XP_231302 | 0.8222920280457569 |
| XP_231307 | 1.1617663216016945 |
| XP_231354 | 1.4573031984734892 |
| XP_231361 | 1.1056254493414115 |
| XP_231505 | 0.7330390450673109 |
| XP_231552 | 1.2131637175130445 |
| XP_231561 | 1.0580667840469338 |
| XP_231594 | 1.336248790096361  |
| XP_231599 | 0.9566601590396377 |
| XP_231616 | 1.0677306670499425 |
| XP_231617 | 1.007155957127714  |
| XP_231625 | -1                 |
| XP_231655 | 0.9658598700228717 |
| XP_231658 | 1.1654603853912398 |
| XP_231707 | 1.173886431619468  |
| XP_231724 | 0.9367798131888233 |
| XP_231725 | -1                 |
| XP_231728 | 1.0766851548878944 |
| XP_231739 | 1.3457734306260747 |
| XP_231749 | 1.045117826291473  |
| XP_231763 | 1.4062337195186199 |
| XP_231785 | 1.1057313990110502 |
| XP_231803 | 1.1832017221014215 |
| XP_231860 | 1.3397378770251862 |
| XP_231873 | 1.1251394213272226 |
| XP_231925 | 0.9098236800246023 |
| XP_231999 | 0.8035467072467822 |
| XP_232055 | 0.8993230842528758 |
| XP_232064 | 1.1054865080428562 |
| XP_232102 | 1.0184018762974452 |
| XP_232111 | 8.824826609176588  |
| XP_232114 | 0.7766277223839445 |
| XP_232123 | 1.206333571550619  |
| XP_232134 | 0.6212878194839653 |
| XP_232139 | 1.0738779908974467 |
| XP_232140 | 1.068274566235975  |



|           |                    |
|-----------|--------------------|
| XP_232170 | 1.1963147806083223 |
| XP_232194 | 0.8427867534056238 |
| XP_232195 | 0.993069380568674  |
| XP_232197 | 1.2885574988451962 |
| XP_232200 | 1.0305065651654606 |
| XP_232237 | 0.8587811446595438 |
| XP_232246 | 0.8658284302678543 |
| XP_232252 | 1.2489246709977135 |
| XP_232253 | -1                 |
| XP_232270 | 0.6156852193964643 |
| XP_232273 | 1.30938435792344   |
| XP_232276 | 0.7701543647850163 |
| XP_232281 | 1.3121713047290304 |
| XP_232283 | -1                 |
| XP_232287 | 1.119279483454792  |
| XP_232293 | 1.0781031033024966 |
| XP_232323 | 1.1222296545146446 |
| XP_232335 | 0.9667056678893227 |
| XP_232336 | 0.846799311388384  |
| XP_232343 | 0.9870439040004073 |
| XP_232347 | -1                 |
| XP_232350 | 0.9174665238802039 |
| XP_232351 | 1.0106127326532826 |
| XP_232354 | 1.0655691321081115 |
| XP_232363 | -1                 |
| XP_232370 | 1.137124487638665  |
| XP_232400 | -1                 |
| XP_232418 | 1.367017816015809  |
| XP_232463 | 1.1289339149110547 |
| XP_232466 | 0.9098621926139616 |
| XP_232475 | 1.5487896372897108 |
| XP_232477 | 1.2947258791247886 |
| XP_232488 | 1.0346961589552903 |
| XP_232531 | 0.6794484686448857 |
| XP_232536 | 0.8564640888571898 |
| XP_232578 | 1.0634651673236644 |
| XP_232586 | 0.9061666166416827 |
| XP_232587 | 1.4928591672701101 |
| XP_232608 | -1                 |
| XP_232614 | 1.0126435926202717 |
| XP_232615 | 1.0014513050534106 |
| XP_232620 | -1                 |
| XP_232640 | -1                 |
| XP_232641 | 1.0196782559644137 |
| XP_232646 | 1.267236971258267  |
| XP_232648 | 0.9289642666235786 |
| XP_232651 | 1.0069578851130454 |
| XP_232671 | 1.2194149056775068 |
| XP_232675 | 0.6112997516534155 |
| XP_232701 | 0.6817717857164212 |
| XP_232709 | -1                 |
| XP_232716 | 1.1248461886435825 |
| XP_232732 | 1.386853518578736  |
| XP_232742 | 1.014287727741651  |
| XP_232745 | 1.8817266441834721 |
| XP_232747 | -1                 |
| XP_232757 | 0.9875636210342225 |
| XP_232763 | 1.1345068354224785 |
| XP_232766 | 1.3868032936628396 |
| XP_232769 | 0.7351439105732296 |
| XP_232775 | 0.9701917817424666 |
| XP_232778 | 0.8561807871043817 |

|           |                     |
|-----------|---------------------|
| XP_232779 | 1.1208997682119732  |
| XP_232784 | 1.3866184934050034  |
| XP_232785 | 0.9039321359400493  |
| XP_232797 | 0.9645577549055421  |
| XP_232819 | 1.078739454046589   |
| XP_232828 | 1.5643789617438213  |
| XP_232837 | 1.0812784539495557  |
| XP_232847 | 1.489673971675272   |
| XP_232859 | 1.1638322203209854  |
| XP_232860 | 1.2156178799121757  |
| XP_232879 | 0.9360601968124893  |
| XP_232884 | 1.0650799256349457  |
| XP_232889 | 0.9257289740589189  |
| XP_232897 | 1.0738435791638827  |
| XP_232898 | 2.4145024647387916  |
| XP_232901 | 0.9701024740898638  |
| XP_232902 | 1.0735599184716131  |
| XP_232918 | -1                  |
| XP_232919 | -1                  |
| XP_232929 | 1.0638334623073968  |
| XP_232937 | 1.0694774511246081  |
| XP_232941 | 1.0080551977586307  |
| XP_232950 | 1.1184391276801764  |
| XP_232963 | 1.0953928490427     |
| XP_232972 | 0.9583991616798077  |
| XP_232983 | 1.3072998172572792  |
| XP_232987 | 1.226387541675045   |
| XP_232988 | 1.1794544793204238  |
| XP_232990 | -1                  |
| XP_233004 | 0.9472076933380591  |
| XP_233017 | -1                  |
| XP_233031 | 0.9263827763784249  |
| XP_233037 | 0.9361491926814276  |
| XP_233039 | 0.9391875053825389  |
| XP_233065 | 0.39478181206978186 |
| XP_233080 | 1.6575549860057794  |
| XP_233081 | 1.308588010464575   |
| XP_233093 | 0.9660947591669112  |
| XP_233103 | 1.137312493398054   |
| XP_233106 | 0.48973531810882265 |
| XP_233112 | 0.7267698325498153  |
| XP_233122 | 1.9868949344411424  |
| XP_233123 | 1.0579575186055827  |
| XP_233132 | 0.957046910134684   |
| XP_233137 | 0.9045282995594924  |
| XP_233139 | 0.8828406463179955  |
| XP_233141 | -1                  |
| XP_233143 | 1.3598184215383775  |
| XP_233144 | 0.9619799564176119  |
| XP_233182 | -1                  |
| XP_233212 | 1.071513483875202   |
| XP_233215 | 1.4648084675243116  |
| XP_233216 | -1                  |
| XP_233217 | 1.3526503640695218  |
| XP_233225 | 0.9785574898828883  |
| XP_233227 | 0.8937118912085257  |
| XP_233231 | 0.9142335327620194  |
| XP_233240 | 1.1078764779463564  |
| XP_233244 | 1.5802637680226583  |
| XP_233250 | 1.1782981349090151  |
| XP_233266 | 1.1693892794812526  |
| XP_233268 | 1.3711075958104093  |

|           |                     |
|-----------|---------------------|
| XP_233269 | 2.3644254251449515  |
| XP_233272 | 1.1187447215103987  |
| XP_233277 | 0.9836085170471213  |
| XP_233280 | -1                  |
| XP_233288 | 1.045505200299422   |
| XP_233305 | 0.9782658464886556  |
| XP_233308 | 1.1802104017412804  |
| XP_233313 | 0.7009469048890647  |
| XP_233316 | 1.1240788231867649  |
| XP_233325 | -1                  |
| XP_233326 | 1.0664237145547644  |
| XP_233335 | 0.8789306975531399  |
| XP_233337 | -1                  |
| XP_233342 | 1.0102518400615377  |
| XP_233356 | 1.0837580026063633  |
| XP_233371 | 1.0244052802878902  |
| XP_233380 | -1                  |
| XP_233382 | 0.9503724279141955  |
| XP_233413 | -1                  |
| XP_233417 | 1.0400549885765145  |
| XP_233421 | 1.0062165847111952  |
| XP_233422 | -1                  |
| XP_233424 | 0.49695620305074195 |
| XP_233428 | -1                  |
| XP_233431 | 0.8383285888581279  |
| XP_233435 | 1.427865352715603   |
| XP_233437 | -1                  |
| XP_233439 | 0.647007745948623   |
| XP_233446 | -1                  |
| XP_233448 | 1.2140820944063409  |
| XP_233452 | -1                  |
| XP_233453 | 0.868586944983397   |
| XP_233462 | 1.0692402824065634  |
| XP_233464 | 1.170388010182493   |
| XP_233467 | 1.0779198677807047  |
| XP_233475 | 1.1950255659866957  |
| XP_233485 | 0.7044117475629781  |
| XP_233493 | 1.043325652522422   |
| XP_233498 | -1                  |
| XP_233499 | -1                  |
| XP_233500 | 0.9052168583784815  |
| XP_233506 | 1.3976151265828207  |
| XP_233508 | 1.2626775581785343  |
| XP_233517 | 1.2260764350465216  |
| XP_233522 | 5.810508347698616   |
| XP_233523 | 1.1801128009109527  |
| XP_233529 | 1.5468404693179814  |
| XP_233535 | 1.2884528197133587  |
| XP_233542 | 0.8127626224162064  |
| XP_233555 | 0.9742564519437718  |
| XP_233556 | 0.9882131108940874  |
| XP_233567 | 1.4793720246825544  |
| XP_233581 | 0.7020338248363358  |
| XP_233595 | 0.8590081581586251  |
| XP_233601 | 0.9455910594800172  |
| XP_233602 | -1                  |
| XP_233603 | -1                  |
| XP_233606 | 1.7222554507030499  |
| XP_233611 | 0.8475749341046773  |
| XP_233616 | -1                  |
| XP_233620 | 0.8910144817323603  |
| XP_233629 | 0.7303130666117411  |

|           |                     |
|-----------|---------------------|
| XP_233636 | 1.0074943220999983  |
| XP_233642 | 1.254840992469964   |
| XP_233669 | 1.085359985888725   |
| XP_233673 | 2.204126464260357   |
| XP_233676 | 1.1690980333243455  |
| XP_233679 | 1.861737103475644   |
| XP_233684 | -1                  |
| XP_233692 | 0.5875494833021454  |
| XP_233694 | 1.019821394234392   |
| XP_233698 | -1                  |
| XP_233700 | 1.2753429500660827  |
| XP_233702 | 0.4585570305650258  |
| XP_233713 | 1.15758669874071    |
| XP_233719 | -1                  |
| XP_233721 | 0.04967535737024465 |
| XP_233726 | 0.9595752898222912  |
| XP_233728 | 1.4994825024493463  |
| XP_233730 | 0.88258516461307    |
| XP_233737 | -1                  |
| XP_233740 | 1.0021427814123423  |
| XP_233741 | 1.4071291242480106  |
| XP_233767 | -1                  |
| XP_233782 | 1.140098681875372   |
| XP_233792 | 0.9584020057493977  |
| XP_233793 | 0.8104205334611237  |
| XP_233798 | 0.8661491710825827  |
| XP_233805 | 1.1626272040510697  |
| XP_233806 | 0.964833893180361   |
| XP_233812 | 1.8608454433433839  |
| XP_233815 | 1.411770735002678   |
| XP_233824 | 0.9464015627147762  |
| XP_233830 | 0.5955148749205347  |
| XP_233839 | 1.2830303427394267  |
| XP_233842 | 1.2656442385459332  |
| XP_233856 | -1                  |
| XP_233868 | 0.9774964105691931  |
| XP_233872 | 0.7617153381527708  |
| XP_233883 | 0.9682837013642739  |
| XP_233884 | 1.3718517258963132  |
| XP_233885 | 1.0087285946252547  |
| XP_233923 | 0.8073723232455009  |
| XP_233931 | 1.1252533641478504  |
| XP_233937 | 1.1813755753829152  |
| XP_233942 | 1.4346394860625227  |
| XP_233944 | 1.2016564051103384  |
| XP_233945 | 1.310681823321361   |
| XP_233960 | 1.7041874171784546  |
| XP_233962 | 0.6095401776544999  |
| XP_233964 | 1.8486718553895611  |
| XP_233966 | 1.1001976798678934  |
| XP_233968 | -1                  |
| XP_233980 | 1.086757756292296   |
| XP_233988 | 0.7449492366728063  |
| XP_234008 | 1.1170840475911006  |
| XP_234011 | 1.9189375398209592  |
| XP_234023 | 1.3819147239124676  |
| XP_234029 | 0.8407653282656621  |
| XP_234038 | 0.5772757270683795  |
| XP_234039 | 1.267889060647902   |
| XP_234056 | 0.9710749662522288  |
| XP_234077 | -1                  |
| XP_234081 | 0.9517042300858489  |

|           |                    |
|-----------|--------------------|
| XP_234082 | 0.7565737871339788 |
| XP_234092 | 1.1036386750088656 |
| XP_234116 | 0.9885689022303294 |
| XP_234130 | 0.8402892933735013 |
| XP_234139 | -1                 |
| XP_234179 | 0.5471171437782716 |
| XP_234186 | 0.94392060109587   |
| XP_234219 | 0.8818563499161862 |
| XP_234236 | 0.9828591138049642 |
| XP_234255 | -1                 |
| XP_234263 | 1.150180488150718  |
| XP_234264 | 2.2083267753108813 |
| XP_234272 | 0.8850869224898231 |
| XP_234277 | -1                 |
| XP_234281 | 1.1386494325117302 |
| XP_234295 | 0.8968783998805119 |
| XP_234300 | -1                 |
| XP_234303 | 1.099161839834484  |
| XP_234317 | -1                 |
| XP_234320 | 2.5496198458399078 |
| XP_234332 | 1.1023823829914594 |
| XP_234335 | 0.9779675582944019 |
| XP_234338 | 1.2819120483182114 |
| XP_234345 | 1.021732517906428  |
| XP_234361 | 0.7980160258740908 |
| XP_234368 | 0.8833339416952051 |
| XP_234377 | 1.1730100379644524 |
| XP_234385 | -1                 |
| XP_234393 | 1.1385417729520027 |
| XP_234394 | 0.8983692358822676 |
| XP_234398 | -1                 |
| XP_234409 | -1                 |
| XP_234412 | 0.9489351432819211 |
| XP_234415 | 1.0436247399693646 |
| XP_234416 | 1.1100550340025748 |
| XP_234420 | 1.0925066029098642 |
| XP_234422 | -1                 |
| XP_234426 | 0.807770581649931  |
| XP_234428 | 0.8944553142910681 |
| XP_234429 | 1.8456339830053785 |
| XP_234434 | -1                 |
| XP_234441 | 1.467771042354597  |
| XP_234442 | 1.3414024789180552 |
| XP_234471 | -1                 |
| XP_234483 | 1.1997005982417053 |
| XP_234484 | -1                 |
| XP_234491 | 1.1644674924402736 |
| XP_234508 | 1.054027978164734  |
| XP_234520 | 0.8892894533675039 |
| XP_234523 | -1                 |
| XP_234532 | -1                 |
| XP_234543 | -1                 |
| XP_234544 | 0.8036724974619921 |
| XP_234547 | 1.2729311090364812 |
| XP_234555 | 0.9393404974872988 |
| XP_234558 | -1                 |
| XP_234565 | -1                 |
| XP_234568 | 1.1260175499016627 |
| XP_234572 | 1.354695591652223  |
| XP_234579 | 0.9464765567358445 |
| XP_234581 | 0.6079677981890727 |
| XP_234583 | 0.5832928204290666 |

|           |                     |
|-----------|---------------------|
| XP_234588 | -1                  |
| XP_234646 | 1.139710622002079   |
| XP_234693 | 0.9456841779503581  |
| XP_234695 | 0.7028700189968952  |
| XP_234706 | 1.3704690654009637  |
| XP_234709 | 1.057004862371486   |
| XP_234715 | 1.1995094781318618  |
| XP_234720 | 1.3244643326449723  |
| XP_234725 | 1.0370188012907524  |
| XP_234768 | 1.1177894283641154  |
| XP_234776 | 1.1424426668689425  |
| XP_234787 | 1.1972379529810095  |
| XP_234801 | 1.2203137757851146  |
| XP_234837 | -1                  |
| XP_234839 | 1.2473381796395466  |
| XP_234841 | 0.7936871630194212  |
| XP_234843 | 0.949957753295991   |
| XP_234877 | 0.7997842329483326  |
| XP_234880 | 0.6888528865920128  |
| XP_234885 | 0.9540938892856561  |
| XP_234896 | 1.2475743762178035  |
| XP_234900 | 1.0438311737341117  |
| XP_234902 | 0.939102181855356   |
| XP_234908 | 1.3130269149386582  |
| XP_234909 | 0.8086036251668042  |
| XP_234910 | 2.3893091426496524  |
| XP_234914 | -1                  |
| XP_234920 | 0.8953544751576928  |
| XP_234921 | 0.9795755741950812  |
| XP_234923 | -1                  |
| XP_234926 | 0.848948387822638   |
| XP_234928 | 0.6422820753904622  |
| XP_234939 | 0.6572593883837241  |
| XP_234942 | -1                  |
| XP_234961 | -1                  |
| XP_234965 | 0.9343149192560208  |
| XP_234966 | 1.2406073248520302  |
| XP_234988 | 0.9773749793123656  |
| XP_234993 | 0.26282826644166474 |
| XP_235003 | -1                  |
| XP_235005 | -1                  |
| XP_235012 | -1                  |
| XP_235051 | 0.9156553061100986  |
| XP_235055 | 1.4598507961642773  |
| XP_235057 | 0.9119940991315301  |
| XP_235069 | -1                  |
| XP_235070 | 1.7362735521481634  |
| XP_235083 | 0.9945951516339084  |
| XP_235088 | -1                  |
| XP_235093 | 1.0277197641356441  |
| XP_235095 | 1.2106735055011246  |
| XP_235113 | 1.2420294864970765  |
| XP_235115 | 1.1476512017152274  |
| XP_235128 | 0.9784500668149286  |
| XP_235146 | 0.9134074230799569  |
| XP_235156 | 1.4599091266952646  |
| XP_235157 | 1.395250729443145   |
| XP_235162 | -1                  |
| XP_235168 | 0.9226420053092662  |
| XP_235169 | 1.9718345190260302  |
| XP_235172 | -1                  |
| XP_235176 | 0.9507786577193472  |

|           |                     |
|-----------|---------------------|
| XP_235179 | 1.0783555040018171  |
| XP_235183 | 0.6159751822089198  |
| XP_235198 | 1.7570223311712836  |
| XP_235200 | -1                  |
| XP_235207 | 1.098491166119787   |
| XP_235213 | 1.2201167992209736  |
| XP_235224 | 1.0554759275563916  |
| XP_235248 | -1                  |
| XP_235261 | 1.2795826886929287  |
| XP_235288 | 1.2460134470566817  |
| XP_235289 | 1.1480834957673056  |
| XP_235296 | 1.5095003332247034  |
| XP_235308 | 1.6336457787264826  |
| XP_235318 | 1.408934348680547   |
| XP_235326 | -1                  |
| XP_235338 | 1.070837191334273   |
| XP_235347 | 1.4953455271518896  |
| XP_235349 | -1                  |
| XP_235372 | 0.8702857017753516  |
| XP_235375 | 1.3911690125553287  |
| XP_235391 | 1.2489633749776898  |
| XP_235393 | 0.9962354015239305  |
| XP_235395 | 0.9420875868787443  |
| XP_235398 | 1.0151122117524023  |
| XP_235400 | 0.7796373752653828  |
| XP_235410 | 0.8519793768729702  |
| XP_235420 | 2.1749771998279126  |
| XP_235426 | 1.385200787344742   |
| XP_235436 | 0.9147577492154456  |
| XP_235439 | 0.7543584730237954  |
| XP_235445 | 1.0586184669244172  |
| XP_235448 | 1.011398937149658   |
| XP_235449 | 0.8184275867452321  |
| XP_235452 | 0.9066960443048043  |
| XP_235454 | 0.8679397016886721  |
| XP_235461 | 0.9333753075879478  |
| XP_235473 | 0.9742369353769972  |
| XP_235474 | 1.2183660567807244  |
| XP_235476 | 1.0513251290250503  |
| XP_235478 | 0.9919662621484635  |
| XP_235493 | -1                  |
| XP_235496 | 0.9628766244240777  |
| XP_235497 | 0.8600064470308787  |
| XP_235500 | -1                  |
| XP_235509 | 0.9032715425124259  |
| XP_235511 | 1.032428758280895   |
| XP_235513 | 1.140967734923555   |
| XP_235515 | 0.6517341122997357  |
| XP_235517 | 0.8033617080557862  |
| XP_235518 | 0.8815578996152583  |
| XP_235527 | -1                  |
| XP_235529 | 0.38913992668903424 |
| XP_235548 | 1.116997479151049   |
| XP_235552 | -1                  |
| XP_235555 | 0.9991812617640635  |
| XP_235559 | 1.1544990827135362  |
| XP_235561 | 1.0741756706408858  |
| XP_235562 | 0.9835262574935227  |
| XP_235563 | -1                  |
| XP_235565 | -1                  |
| XP_235571 | -1                  |
| XP_235581 | 1.3133253062595887  |

|           |                    |
|-----------|--------------------|
| XP_235593 | 1.0995495374501334 |
| XP_235598 | 1.018028053132977  |
| XP_235610 | 1.1930467844963477 |
| XP_235625 | 0.7366395739578411 |
| XP_235633 | -1                 |
| XP_235639 | 1.3623452773266476 |
| XP_235640 | 1.17781816889271   |
| XP_235645 | 3.277529056779728  |
| XP_235649 | -1                 |
| XP_235650 | 0.9347818153035493 |
| XP_235656 | 2.3366874664517057 |
| XP_235661 | 1.289156623631223  |
| XP_235668 | 1.8672408211920437 |
| XP_235670 | -1                 |
| XP_235686 | 2.0075802144190735 |
| XP_235687 | 1.6710829158319591 |
| XP_235689 | 0.9646923179879199 |
| XP_235691 | 1.0143351753806606 |
| XP_235705 | 1.068442643416223  |
| XP_235710 | 1.172566556573679  |
| XP_235711 | 1.2627074052262255 |
| XP_235717 | 1.0839384362201279 |
| XP_235722 | 0.9520545504589464 |
| XP_235761 | 0.8546720679804257 |
| XP_235768 | -1                 |
| XP_235782 | 1.2208427577089775 |
| XP_235792 | 1.2392667284911154 |
| XP_235805 | -1                 |
| XP_235807 | 0.9082589998992262 |
| XP_235808 | 0.890862401771054  |
| XP_235821 | 1.1367388294119605 |
| XP_235822 | 0.994689219909965  |
| XP_235826 | 1.9004465957550343 |
| XP_235831 | 1.1811145473244482 |
| XP_235840 | -1                 |
| XP_235865 | 0.9270580284461772 |
| XP_235886 | 0.9192904910699007 |
| XP_235905 | 1.5354612794557712 |
| XP_235922 | 1.0355620316237049 |
| XP_235942 | 1.2810930816165405 |
| XP_235947 | 1.2778572944250468 |
| XP_235955 | 0.8862301743110664 |
| XP_235959 | 0.6446823402443879 |
| XP_235972 | 0.6985068338977082 |
| XP_235979 | -1                 |
| XP_235988 | 1.1182331996987438 |
| XP_235989 | 0.9120257104767036 |
| XP_235993 | -1                 |
| XP_236010 | 1.002045676348428  |
| XP_236020 | 1.0401779248323895 |
| XP_236042 | 1.1386039287659167 |
| XP_236056 | 1.5050523079503582 |
| XP_236077 | 2.226593982855279  |
| XP_236086 | 1.331262629808622  |
| XP_236099 | 1.2474186614613076 |
| XP_236102 | 1.2269948162865896 |
| XP_236106 | 0.8690124829758258 |
| XP_236124 | 1.1291246304875822 |
| XP_236128 | 1.0222786779985986 |
| XP_236134 | 1.2015130513807588 |
| XP_236145 | 0.6340173216105203 |
| XP_236150 | 1.558391664143473  |



|           |                     |
|-----------|---------------------|
| XP_236151 | 0.930343597458004   |
| XP_236158 | 0.7781741211642992  |
| XP_236174 | 1.5092209287334146  |
| XP_236179 | 0.8356288237861904  |
| XP_236180 | 0.37478896622422636 |
| XP_236189 | 0.8662638951103951  |
| XP_236194 | -1                  |
| XP_236196 | 1.0541750196888453  |
| XP_236201 | 1.8896831468501718  |
| XP_236203 | 1.3536281536124066  |
| XP_236206 | 1.0827461763268504  |
| XP_236210 | 0.49240471186954177 |
| XP_236212 | 1.0945094572507048  |
| XP_236221 | -1                  |
| XP_236230 | 1.15187469974312    |
| XP_236231 | 1.3650530325430401  |
| XP_236242 | -1                  |
| XP_236249 | 0.7938929986529449  |
| XP_236253 | -1                  |
| XP_236263 | 1.1554186181845698  |
| XP_236270 | 2.7779711051812725  |
| XP_236272 | 1.0405279802200882  |
| XP_236274 | 1.186927442284228   |
| XP_236275 | -1                  |
| XP_236276 | 1.0343593516940752  |
| XP_236283 | 1.4582557153889035  |
| XP_236286 | -1                  |
| XP_236292 | -1                  |
| XP_236296 | 1.328642975027564   |
| XP_236298 | 1.0402273031526688  |
| XP_236306 | -1                  |
| XP_236307 | 1.175159264327468   |
| XP_236312 | 1.065784744453606   |
| XP_236313 | -1                  |
| XP_236314 | 1.002330416572691   |
| XP_236320 | 1.1525562891105257  |
| XP_236321 | 1.244392720334352   |
| XP_236325 | 0.24325361999262962 |
| XP_236329 | 1.1756684853451427  |
| XP_236331 | 1.077242100530974   |
| XP_236333 | 1.6608757082824355  |
| XP_236338 | 1.2564832268959287  |
| XP_236350 | 1.161053581971537   |
| XP_236352 | 0.9780962476710854  |
| XP_236353 | 1.0306374139958305  |
| XP_236355 | 1.0304537373662201  |
| XP_236358 | -1                  |
| XP_236362 | 1.0110461483646251  |
| XP_236367 | -1                  |
| XP_236370 | -1                  |
| XP_236381 | 0.9942822251792688  |
| XP_236392 | -1                  |
| XP_236397 | 1.2377677401656746  |
| XP_236408 | -1                  |
| XP_236412 | 1.249573481839152   |
| XP_236420 | 1.2786471051042847  |
| XP_236428 | -1                  |
| XP_236444 | 1.217106377715998   |
| XP_236449 | 1.1533770009725093  |
| XP_236458 | 1.1581717628847115  |
| XP_236461 | 0.6257628240085426  |
| XP_236468 | -1                  |

|           |                    |
|-----------|--------------------|
| XP_236471 | 1.1549676019593669 |
| XP_236493 | -1                 |
| XP_236501 | 0.7462622637893451 |
| XP_236515 | 0.9613018769327324 |
| XP_236524 | 1.2874731692821293 |
| XP_236553 | 0.9582458034092497 |
| XP_236571 | 0.5228165701215339 |
| XP_236579 | 1.402189039920458  |
| XP_236595 | -1                 |
| XP_236602 | 1.7322285162192128 |
| XP_236606 | 0.8731789924788994 |
| XP_236613 | 1.0865000755565664 |
| XP_236614 | 1.0807424333246638 |
| XP_236616 | 1.127067575860756  |
| XP_236624 | 1.1040290933593495 |
| XP_236627 | 1.004846291389817  |
| XP_236628 | -1                 |
| XP_236629 | -1                 |
| XP_236630 | 0.4528729855408629 |
| XP_236639 | 1.0294577239472167 |
| XP_236644 | 0.7767244898268455 |
| XP_236646 | 0.7164447477150505 |
| XP_236649 | 1.0768382892124118 |
| XP_236654 | 1.367676703003825  |
| XP_236656 | 0.746538820067861  |
| XP_236658 | 0.8178573249830222 |
| XP_236659 | 1.4362498048166101 |
| XP_236665 | 1.2143437001391761 |
| XP_236675 | 1.1003507977902691 |
| XP_236676 | 0.2285536976529797 |
| XP_236685 | 0.8844973215723683 |
| XP_236698 | 1.0336219619664748 |
| XP_236702 | 1.0671943293219737 |
| XP_236703 | 0.986584776860139  |
| XP_236715 | 1.1405019675954229 |
| XP_236718 | 1.2714289057249635 |
| XP_236722 | 1.1757742461413547 |
| XP_236723 | 1.7716147193244365 |
| XP_236725 | 0.83731544822543   |
| XP_236726 | 0.7567907936527841 |
| XP_236730 | 1.0027152323042212 |
| XP_236734 | 1.433441285967889  |
| XP_236735 | 0.9581462818124448 |
| XP_236745 | 0.9580181499788339 |
| XP_236746 | -1                 |
| XP_236755 | -1                 |
| XP_236768 | 1.8742067809726888 |
| XP_236769 | 1.1004554602326504 |
| XP_236774 | 1.2938866881120414 |
| XP_236783 | 0.8934906636329454 |
| XP_236784 | 1.1687793834478002 |
| XP_236798 | 0.9630999827502926 |
| XP_236813 | 1.38574872436672   |
| XP_236820 | 1.4949940910059674 |
| XP_236822 | 1.3060899226664728 |
| XP_236825 | 1.2291822606674472 |
| XP_236870 | 1.1104347502633236 |
| XP_236909 | 0.9756865271151339 |
| XP_236911 | 0.965345123353122  |
| XP_236914 | -1                 |
| XP_236916 | 1.1503443167947838 |
| XP_236917 | 1.871282823389257  |

|           |                    |
|-----------|--------------------|
| XP_236920 | 1.4882279722415241 |
| XP_236926 | 0.5805082623866543 |
| XP_236927 | 0.9751845015713316 |
| XP_236929 | 0.8715940466279031 |
| XP_236930 | 1.0173075360532076 |
| XP_236932 | 1.0730447157615814 |
| XP_236934 | -1                 |
| XP_236937 | 0.8089894823810768 |
| XP_236953 | 1.213318660001526  |
| XP_236955 | 0.8764637431499738 |
| XP_236956 | 1.039595164453093  |
| XP_236979 | 0.7578883717848792 |
| XP_236984 | 0.7955093761085339 |
| XP_236988 | 1.1304980510640779 |
| XP_236990 | -1                 |
| XP_237009 | -1                 |
| XP_237019 | 1.292146284002406  |
| XP_237039 | 0.841332069971976  |
| XP_237042 | 1.2854326048361309 |
| XP_237046 | 1.1016301118166967 |
| XP_237056 | 1.0724961737806862 |
| XP_237064 | 1.0701490391113115 |
| XP_237071 | 0.9847707350300414 |
| XP_237073 | 1.3454707281047693 |
| XP_237079 | 1.0244316643876865 |
| XP_237084 | 1.0831710907912555 |
| XP_237086 | -1                 |
| XP_237087 | 1.0716527942873313 |
| XP_237088 | 0.7640372813536128 |
| XP_237091 | 1.5357811498872613 |
| XP_237093 | 0.9023785533557079 |
| XP_237102 | 0.6872641048075053 |
| XP_237111 | 0.816020954096247  |
| XP_237112 | 1.8845535043790491 |
| XP_237113 | -1                 |
| XP_237115 | 0.98607586064201   |
| XP_237116 | 0.9664899815180675 |
| XP_237147 | -1                 |
| XP_237151 | 0.9951050391784905 |
| XP_237166 | 1.0299861922171567 |
| XP_237174 | 1.102933841395639  |
| XP_237177 | 1.1595909920324834 |
| XP_237180 | 1.1523278446482241 |
| XP_237184 | 1.2232121699678413 |
| XP_237187 | 1.382797019915915  |
| XP_237191 | 0.7942011817884023 |
| XP_237195 | 0.627058555046344  |
| XP_237215 | -1                 |
| XP_237217 | 1.6134004362566798 |
| XP_237232 | 1.1222550435157592 |
| XP_237238 | 1.4073590110319818 |
| XP_237241 | 1.0720713557718748 |
| XP_237242 | 1.048149384077183  |
| XP_237246 | 1.3078614259871608 |
| XP_237255 | -1                 |
| XP_237287 | 1.1179715095616967 |
| XP_237291 | 0.849229872915816  |
| XP_237293 | 1.0110421158170604 |
| XP_237295 | 1.3771631083894826 |
| XP_237311 | 0.8466721128268332 |
| XP_237313 | 0.9295454089669274 |
| XP_237316 | 0.7555282180025954 |

|           |                      |
|-----------|----------------------|
| XP_237323 | 0.71358546676663     |
| XP_237347 | 0.9008272874209476   |
| XP_237359 | -1                   |
| XP_237363 | 1.256403339023341    |
| XP_237365 | 1.6297961282419327   |
| XP_237369 | 1.1596191074668136   |
| XP_237375 | 1.446033886632578    |
| XP_237386 | 1.127322326117124    |
| XP_237388 | 1.2267959881653845   |
| XP_237395 | 0.8637323550085007   |
| XP_237416 | 0.8857151284643239   |
| XP_237421 | -1                   |
| XP_237444 | 1.0291991129561082   |
| XP_237454 | 1.7963126535804446   |
| XP_237464 | 1.3816014614722296   |
| XP_237474 | 1.1355241743200335   |
| XP_237497 | -1                   |
| XP_237509 | 1.0647049638075077   |
| XP_237523 | 0.946689154673993    |
| XP_237524 | 1.3625029802912423   |
| XP_237535 | 0.11926255016554747  |
| XP_237536 | 2.8491992808486377   |
| XP_237548 | 1.2666082453343044   |
| XP_237588 | 0.909147170218275    |
| XP_237614 | 1.0021652606191715   |
| XP_237701 | 1.859999574270324    |
| XP_237718 | 1.3848339154874163   |
| XP_237746 | 0.9882410899047184   |
| XP_237754 | -1                   |
| XP_237758 | -1                   |
| XP_237764 | 0.9903826642005953   |
| XP_237773 | 0.9241307931156586   |
| XP_237782 | 0.8191799880397616   |
| XP_237786 | 1.1916061140396643   |
| XP_237787 | -1                   |
| XP_237790 | 0.7479791813370956   |
| XP_237792 | 0.050925496206180774 |
| XP_237807 | 0.896969197508611    |
| XP_237808 | 1.0221286196421837   |
| XP_237817 | 1.2312543522299455   |
| XP_237825 | 0.893305705975223    |
| XP_237828 | 0.9744585387731023   |
| XP_237842 | 1.0469891630738546   |
| XP_237865 | 0.9137002876308424   |
| XP_237868 | 1.1660157576721517   |
| XP_237878 | 0.9175580310262124   |
| XP_237883 | 0.650535768809421    |
| XP_237884 | -1                   |
| XP_237903 | 0.8816492208834203   |
| XP_237905 | 0.953050606064726    |
| XP_237911 | -1                   |
| XP_237924 | 1.4125507928412109   |
| XP_237930 | 1.0779643774210417   |
| XP_237944 | 0.5872780895007309   |
| XP_237957 | 0.7980220918773737   |
| XP_237959 | -1                   |
| XP_237965 | 0.8722765294200726   |
| XP_237967 | 0.04536699267941055  |
| XP_237971 | 3.0061370462053567   |
| XP_237984 | 0.9265742426696206   |
| XP_237992 | 1.0228815100429132   |
| XP_237998 | 1.2111030810554488   |

|           |                    |
|-----------|--------------------|
| XP_237999 | 0.8576770123121789 |
| XP_238004 | 1.1471213363128039 |
| XP_238005 | 1.120547024134397  |
| XP_238016 | 1.3676712481361353 |
| XP_238019 | 1.0576074728265477 |
| XP_238028 | -1                 |
| XP_238042 | -1                 |
| XP_238048 | 1.2091717388724237 |
| XP_238057 | 0.9648519929586757 |
| XP_238063 | 1.107668902573774  |
| XP_238072 | -1                 |
| XP_238078 | 1.0539960054781203 |
| XP_238082 | 1.2996788679406028 |
| XP_238088 | 1.0987743309591207 |
| XP_238093 | 1.2876871335652778 |
| XP_238097 | 1.0109305409162637 |
| XP_238103 | 0.9374158379340815 |
| XP_238104 | 0.8454041300688875 |
| XP_238106 | -1                 |
| XP_238109 | -1                 |
| XP_238119 | 1.993212397517153  |
| XP_238138 | 1.0489498076092783 |
| XP_238141 | 1.0274846320937538 |
| XP_238146 | 0.9417968410138627 |
| XP_238151 | 0.3086922656759667 |
| XP_238154 | 1.0099429129071213 |
| XP_238155 | 0.8629512896250645 |
| XP_238163 | 0.5964302724182832 |
| XP_238166 | 1.1650479926482764 |
| XP_238167 | 1.2150159017918474 |
| XP_238190 | 0.7726791444493801 |
| XP_238193 | 1.1781226522924355 |
| XP_238205 | -1                 |
| XP_238208 | 1.0817303049934748 |
| XP_238213 | 1.1236841185976973 |
| XP_238215 | 0.6240503842104307 |
| XP_238235 | 1.1057057816165725 |
| XP_238238 | 1.1190945129201313 |
| XP_238243 | 0.8969577312954436 |
| XP_238245 | 1.8502139162052507 |
| XP_238247 | 0.9380729467348196 |
| XP_238278 | 1.0256221081930879 |
| XP_238280 | 0.9602300299717381 |
| XP_238285 | 1.9814369349827647 |
| XP_238286 | 1.289081729006272  |
| XP_238302 | -1                 |
| XP_238312 | -1                 |
| XP_238313 | 1.0100683500210075 |
| XP_238320 | 0.8910010201764926 |
| XP_238321 | 1.841762202233772  |
| XP_238325 | 1.5223764012283088 |
| XP_238327 | 0.8872634828543696 |
| XP_238330 | 0.9513283905961823 |
| XP_238333 | 0.9339411869399922 |
| XP_238336 | 1.324184800551594  |
| XP_238346 | 0.9691783097463943 |
| XP_238366 | -1                 |
| XP_238368 | 1.1485017550249113 |
| XP_238369 | 1.11938947708645   |
| XP_238380 | 0.9339079938384803 |
| XP_238382 | 0.9625926830410327 |
| XP_238384 | 1.2264999615155103 |

|           |                     |
|-----------|---------------------|
| XP_238392 | -1                  |
| XP_238393 | 0.8878103088828682  |
| XP_238396 | 1.0428033942915307  |
| XP_238407 | 0.7074278638058688  |
| XP_238408 | -1                  |
| XP_238415 | -1                  |
| XP_238425 | 0.5265478213753556  |
| XP_238442 | 1.277983450800925   |
| XP_238444 | 1.1184835613796833  |
| XP_238447 | 0.9401582533174201  |
| XP_238462 | 1.2587661305351443  |
| XP_238465 | 0.9967369442583806  |
| XP_238467 | 2.1865364481034755  |
| XP_238474 | 1.2201657863953919  |
| XP_238480 | 1.2401692042682726  |
| XP_238508 | 1.1179081705119092  |
| XP_238509 | 0.560776621461277   |
| XP_238518 | 0.9600797926493406  |
| XP_238523 | 1.940219254766805   |
| XP_238534 | 0.8117465157523603  |
| XP_238535 | 0.48144883771222063 |
| XP_238540 | 0.9690560273150886  |
| XP_238543 | 1.0420506699145629  |
| XP_238554 | 1.0519462983081542  |
| XP_238561 | 0.9202380580842137  |
| XP_238569 | 0.924552841146578   |
| XP_238570 | 0.6692863613377887  |
| XP_238571 | 1.0160609313233515  |
| XP_238588 | 0.824362135757907   |
| XP_238596 | 1.1920589285481873  |
| XP_238622 | 1.326084899435202   |
| XP_238649 | 1.2507175647030082  |
| XP_238764 | -1                  |
| XP_238770 | 0.9856906636402738  |
| XP_238783 | 0.7351158204026221  |
| XP_238806 | 0.785372853422755   |
| XP_238899 | 1.9787015962494932  |
| XP_238901 | 1.1523921595076294  |
| XP_238988 | 1.0517003798313607  |
| XP_239014 | 1.054994402969786   |
| XP_239062 | 1.0351484724292834  |
| XP_239083 | 1.110065273329282   |
| XP_239095 | -1                  |
| XP_239135 | 0.9247976152939684  |
| XP_239171 | 1.2837083627794754  |
| XP_239247 | 0.6886385189040288  |
| XP_239254 | 1.1147395816153016  |
| XP_239258 | 0.9887964160520061  |
| XP_239260 | 1.394475731505426   |
| XP_239269 | 1.2198903318751895  |
| XP_239329 | 1.180724821574266   |
| XP_239335 | 0.9910269850902064  |
| XP_239336 | 0.992693655474461   |
| XP_239340 | 0.7596612051604638  |
| XP_239346 | 0.9302668252170756  |
| XP_239373 | 0.9327214897055475  |
| XP_239438 | 1.5756530895601741  |
| XP_239603 | 1.4347948675415105  |
| XP_239606 | -1                  |
| XP_239684 | 0.8959251497370745  |
| XP_239761 | -1                  |
| XP_239866 | 1.8042051808643222  |

|           |                    |
|-----------|--------------------|
| XP_239920 | 1.0671143009588828 |
| XP_240072 | 0.987227799821849  |
| XP_240184 | 0.8129752985149606 |
| XP_240311 | -1                 |
| XP_240330 | 2.2244511357159764 |
| XP_240417 | 1.0672963555947517 |
| XP_240446 | 1.4075215487281043 |
| XP_240464 | 1.131930876619947  |
| XP_240482 | 0.8559869106885571 |
| XP_240734 | 0.9676874131235695 |
| XP_240978 | 1.109780515886654  |
| XP_241053 | 1.2195129958397406 |
| XP_241375 | 1.1058394827093128 |
| XP_241458 | 1.258356726694734  |
| XP_241475 | -1                 |
| XP_241525 | 1.9332198354620391 |
| XP_241623 | -1                 |
| XP_241632 | 1.2104632137746054 |
| XP_241671 | 1.1803022300939106 |
| XP_241691 | 1.3635721945028678 |
| XP_241769 | 0.8982647431291362 |
| XP_241770 | 1.1375209757555294 |
| XP_241848 | -1                 |
| XP_242005 | 1.280766364720866  |
| XP_242065 | 0.6530649534882886 |
| XP_242556 | 0.9132729478165396 |
| XP_242644 | 0.7175766340349493 |
| XP_242940 | 0.9667325046699249 |
| XP_242960 | 0.8441539847726713 |
| XP_242982 | 0.968791752100387  |
| XP_242992 | 0.6502939672364361 |
| XP_243032 | 1.000329374526422  |
| XP_243038 | 0.895604823203822  |
| XP_243040 | 1.0357820862299445 |
| XP_243049 | 0.9548887232126134 |
| XP_243122 | 1.130902885707924  |
| XP_243142 | 0.9671066051266153 |
| XP_243280 | 1.1196743773838371 |
| XP_243307 | -1                 |
| XP_243465 | 1.0710601292574422 |
| XP_243478 | -1                 |
| XP_243524 | 1.1492927001381439 |
| XP_243588 | 1.2480043792491615 |
| XP_243637 | 2.254538726946833  |
| XP_243652 | 0.9385389348817226 |
| XP_243749 | 1.1190507963620964 |
| XP_243863 | 0.6960708075020821 |
| XP_243912 | 0.8954010088764782 |
| XP_243980 | 1.0099807582627882 |
| XP_244043 | 1.074160578364082  |
| XP_244124 | -1                 |
| XP_244148 | 1.0717012265294883 |
| XP_244282 | -1                 |
| XP_340739 | 1.012439226516605  |
| XP_340740 | -1                 |
| XP_340741 | 0.9427884174387184 |
| XP_340743 | 0.9438655699387343 |
| XP_340744 | 2.2760044966601956 |
| XP_340748 | 2.004593203420918  |
| XP_340749 | -1                 |
| XP_340750 | 1.0363417103219694 |
| XP_340756 | 1.090665492520436  |

|           |                    |
|-----------|--------------------|
| XP_340761 | 0.7696521415883602 |
| XP_340762 | 0.910812227404468  |
| XP_340764 | 0.3488127079419616 |
| XP_340765 | 1.0608341254479052 |
| XP_340766 | 1.0234164756738806 |
| XP_340769 | 0.9504880429947081 |
| XP_340770 | 1.1228139882241275 |
| XP_340772 | 1.0130463712192312 |
| XP_340774 | -1                 |
| XP_340775 | 0.9266566206237451 |
| XP_340776 | 0.8293472602650721 |
| XP_340784 | 1.118031840738737  |
| XP_340790 | 1.0199347344632212 |
| XP_340793 | 1.227252074618191  |
| XP_340794 | 0.7309091079073547 |
| XP_340797 | 1.0442728062695878 |
| XP_340799 | 0.5837635484419647 |
| XP_340800 | -1                 |
| XP_340802 | -1                 |
| XP_340803 | 0.9303332404180843 |
| XP_340804 | 1.0842308833161234 |
| XP_340806 | 0.8879036691157127 |
| XP_340807 | 1.20563914701935   |
| XP_340808 | 1.5081188813562336 |
| XP_340810 | 0.6739948373549319 |
| XP_340814 | 1.1746601836367767 |
| XP_340817 | 1.0964574247035366 |
| XP_340818 | 8.273865583487854  |
| XP_340820 | -1                 |
| XP_340821 | -1                 |
| XP_340823 | 1.421939990954565  |
| XP_340825 | 1.234466732536372  |
| XP_340826 | -1                 |
| XP_340828 | 0.8421253248615548 |
| XP_340829 | -1                 |
| XP_340832 | 1.0888809652143572 |
| XP_340836 | 1.033838616507236  |
| XP_340839 | 1.5709575014227506 |
| XP_340842 | 0.7642140377901461 |
| XP_340847 | -1                 |
| XP_340849 | 1.3760452453826302 |
| XP_340850 | 0.8415449148129399 |
| XP_340855 | 1.2852523146933879 |
| XP_340857 | 0.8763827328479855 |
| XP_340858 | 0.9774094027963893 |
| XP_340865 | -1                 |
| XP_340867 | -1                 |
| XP_340869 | -1                 |
| XP_340870 | 1.1794436039144123 |
| XP_340871 | 1.5699949251447232 |
| XP_340875 | 1.0476760966095002 |
| XP_340876 | 1.2812052735848078 |
| XP_340881 | 0.983394353482927  |
| XP_340882 | -1                 |
| XP_340887 | 1.1123652981581165 |
| XP_340889 | 1.0210770100169997 |
| XP_340890 | 1.036088123083593  |
| XP_340892 | -1                 |
| XP_340893 | 1.255536762498492  |
| XP_340894 | 0.8641950907540976 |
| XP_340896 | -1                 |
| XP_340897 | -1                 |



|           |                    |
|-----------|--------------------|
| XP_340898 | 1.0240445551465378 |
| XP_340905 | 1.0967496860547152 |
| XP_340906 | 1.1482654233966894 |
| XP_340910 | 0.8506456387221708 |
| XP_340911 | 0.85248874287333   |
| XP_340912 | -1                 |
| XP_340913 | -1                 |
| XP_340914 | 1.17124005060654   |
| XP_340915 | 0.9808095482834155 |
| XP_340918 | 1.1674695918950937 |
| XP_340919 | 1.111708522736545  |
| XP_340922 | -1                 |
| XP_340929 | 1.006252464213711  |
| XP_340930 | 0.8564358783339835 |
| XP_340931 | 3.046111438444786  |
| XP_340937 | 1.3416684628769626 |
| XP_340938 | 1.0709383815170752 |
| XP_340939 | 1.0920221277171838 |
| XP_340940 | 0.938646249743229  |
| XP_340942 | 1.1098894052035992 |
| XP_340947 | 1.1737920031995728 |
| XP_340948 | 1.5863120357930909 |
| XP_340949 | 0.8759325905411327 |
| XP_340962 | 1.1772489221621367 |
| XP_340967 | -1                 |
| XP_340968 | 0.9661919404267174 |
| XP_340971 | 1.0921897984615778 |
| XP_340974 | 1.335968757786782  |
| XP_340978 | 0.9935537560428226 |
| XP_340981 | 1.2296782648904148 |
| XP_340985 | 1.0572907802274456 |
| XP_340987 | 1.4432414568861311 |
| XP_340988 | 1.135607955469178  |
| XP_340989 | 1.1786146361514718 |
| XP_340994 | 0.9614757543632385 |
| XP_340995 | 0.5508366742607586 |
| XP_340997 | 1.0488939355058902 |
| XP_340998 | 1.0111894123329142 |
| XP_341000 | 0.6387911740862883 |
| XP_341005 | 0.8692337535833444 |
| XP_341008 | 0.9824580682435772 |
| XP_341010 | -1                 |
| XP_341011 | 1.1299768336618674 |
| XP_341012 | 1.004503054662781  |
| XP_341016 | 2.352726242369905  |
| XP_341018 | 0.8754396383011173 |
| XP_341020 | -1                 |
| XP_341021 | 0.8161562522329446 |
| XP_341034 | 0.9978359739357511 |
| XP_341038 | 0.9279410000506007 |
| XP_341040 | 1.1116537274558058 |
| XP_341041 | 1.0526500366136216 |
| XP_341042 | 1.6058789792271997 |
| XP_341044 | 0.5467935280939958 |
| XP_341045 | 0.7753524250949949 |
| XP_341049 | 1.194150385747559  |
| XP_341052 | 0.842377685111638  |
| XP_341056 | -1                 |
| XP_341059 | 0.9620297564400355 |
| XP_341064 | 0.8434609992244787 |
| XP_341072 | -1                 |
| XP_341077 | 0.8901077557790306 |

|           |                    |
|-----------|--------------------|
| XP_341079 | 0.7663943562833421 |
| XP_341080 | 1.8872202517069885 |
| XP_341091 | 1.377763492359137  |
| XP_341093 | 1.6123449025968295 |
| XP_341094 | 1.1386514113260222 |
| XP_341095 | 0.9009145220424206 |
| XP_341101 | 0.9768283274432236 |
| XP_341103 | -1                 |
| XP_341111 | 0.7271639236447623 |
| XP_341112 | -1                 |
| XP_341113 | 1.3078736948723777 |
| XP_341115 | -1                 |
| XP_341116 | 0.9876304198859835 |
| XP_341119 | 1.0259931790992043 |
| XP_341121 | 0.8493058347177037 |
| XP_341122 | 0.9798868630450412 |
| XP_341125 | 1.449679391046421  |
| XP_341133 | -1                 |
| XP_341134 | 1.1298192194922472 |
| XP_341137 | 0.9571231289514083 |
| XP_341138 | 1.0446515408367012 |
| XP_341141 | 1.1811930982569925 |
| XP_341142 | 0.7424998527846527 |
| XP_341148 | 1.0938989977051359 |
| XP_341149 | 1.567421569454259  |
| XP_341152 | 1.0142152866265652 |
| XP_341153 | 1.1262102643202565 |
| XP_341156 | 1.2753217927279705 |
| XP_341160 | 1.091325317025231  |
| XP_341162 | 1.2997957648995808 |
| XP_341163 | 0.9316619367804964 |
| XP_341166 | 1.1770133497941402 |
| XP_341170 | 0.8950785750994533 |
| XP_341172 | 1.0905582838837309 |
| XP_341176 | 0.7227370787293382 |
| XP_341181 | 0.8171071896230586 |
| XP_341184 | 1.2331785491066392 |
| XP_341189 | 0.6287000942936692 |
| XP_341197 | -1                 |
| XP_341202 | 1.2071095068994504 |
| XP_341205 | 8.574174245437133  |
| XP_341208 | 1.127623693722394  |
| XP_341211 | 0.9435537913025045 |
| XP_341212 | 1.307272760571233  |
| XP_341220 | -1                 |
| XP_341225 | 1.2978416519197566 |
| XP_341226 | -1                 |
| XP_341228 | -1                 |
| XP_341231 | 1.0793226882336449 |
| XP_341232 | 0.9078992072453951 |
| XP_341233 | -1                 |
| XP_341234 | 5.237397326634471  |
| XP_341237 | 0.9804050905480421 |
| XP_341238 | -1                 |
| XP_341240 | 0.7973539473612558 |
| XP_341241 | -1                 |
| XP_341242 | 0.7649887136209997 |
| XP_341245 | -1                 |
| XP_341246 | 0.7815712763665328 |
| XP_341249 | 1.3981120830615523 |
| XP_341250 | 0.4813242524650107 |
| XP_341251 | 0.9084935439829539 |

|           |                     |
|-----------|---------------------|
| XP_341254 | 0.9329244963076769  |
| XP_341257 | 1.2445075714697234  |
| XP_341259 | -1                  |
| XP_341260 | 1.0806552311570543  |
| XP_341263 | 0.9373330915720096  |
| XP_341265 | 1.15236236688828    |
| XP_341267 | 1.0685884179763043  |
| XP_341273 | 0.8569650600177369  |
| XP_341280 | 1.0525343263349811  |
| XP_341281 | 0.7247623267968463  |
| XP_341282 | 0.98249745963837    |
| XP_341289 | 1.2340100756556125  |
| XP_341290 | 0.28119420163598713 |
| XP_341305 | 0.914319222465601   |
| XP_341306 | 1.1968153934736656  |
| XP_341307 | 1.3461896569512932  |
| XP_341310 | 1.695605004561731   |
| XP_341311 | 1.1245449887168795  |
| XP_341313 | 0.9670161355665869  |
| XP_341315 | 0.8444266163363002  |
| XP_341318 | 1.054282264794369   |
| XP_341319 | 1.1669269938061153  |
| XP_341320 | 0.8123232933942134  |
| XP_341321 | 1.2532767532737468  |
| XP_341322 | 1.027451116234895   |
| XP_341323 | 0.726429755929078   |
| XP_341326 | 157.26728342591457  |
| XP_341332 | 1.035812114197352   |
| XP_341333 | 0.7729027356406339  |
| XP_341336 | 0.8754837818587231  |
| XP_341338 | 1.0158296127885171  |
| XP_341340 | 0.8432880303966893  |
| XP_341342 | -1                  |
| XP_341347 | 1.0563266098519444  |
| XP_341348 | 1.0590248113833935  |
| XP_341350 | 0.9900389501793306  |
| XP_341352 | 0.8589729941289174  |
| XP_341353 | -1                  |
| XP_341354 | 1.02424927050798    |
| XP_341355 | 0.8044823314098405  |
| XP_341359 | 1.295204995124669   |
| XP_341361 | 0.9610706766781295  |
| XP_341367 | 0.9248255181987739  |
| XP_341369 | 0.9649825402326124  |
| XP_341375 | 1.1470702129522021  |
| XP_341377 | 0.9410454594779104  |
| XP_341378 | 1.3332373707422138  |
| XP_341382 | -1                  |
| XP_341384 | 0.8632695632610544  |
| XP_341387 | 0.7724126821314462  |
| XP_341390 | 0.24227739633938242 |
| XP_341394 | 0.9595226212286079  |
| XP_341395 | -1                  |
| XP_341398 | 0.6338528795656219  |
| XP_341399 | 1.1291802128505253  |
| XP_341409 | 1.043047276310748   |
| XP_341413 | -1                  |
| XP_341414 | 0.9304070455298357  |
| XP_341415 | 0.7498120739883736  |
| XP_341416 | 0.906593915734487   |
| XP_341417 | -1                  |
| XP_341420 | 1.3464497306183925  |

|           |                     |
|-----------|---------------------|
| XP_341424 | 0.8463536738942397  |
| XP_341425 | -1                  |
| XP_341429 | 1.9558958209648123  |
| XP_341435 | 0.8133001539439482  |
| XP_341436 | 0.8798986217524325  |
| XP_341437 | 0.9486316412220583  |
| XP_341439 | 1.4275734683065828  |
| XP_341441 | 1.169143082245193   |
| XP_341445 | 1.6612454530698642  |
| XP_341448 | -1                  |
| XP_341451 | 0.47313919139113336 |
| XP_341454 | 1.1784093885148905  |
| XP_341455 | -1                  |
| XP_341456 | 1.2228950102514364  |
| XP_341457 | 0.8461222015405849  |
| XP_341463 | 1.104525299773708   |
| XP_341467 | 1.581807519201537   |
| XP_341468 | 1.3126955468863164  |
| XP_341469 | 0.9020683189990667  |
| XP_341471 | -1                  |
| XP_341475 | 0.7057378430943394  |
| XP_341476 | 1.1327166417225885  |
| XP_341478 | 1.4661760775208943  |
| XP_341480 | 1.09583196971222    |
| XP_341482 | 1.5477516886202105  |
| XP_341485 | 1.795747456464813   |
| XP_341486 | 1.3103567823587985  |
| XP_341491 | 1.1839526497887105  |
| XP_341495 | 1.5919253954888533  |
| XP_341498 | 1.231525003714786   |
| XP_341499 | 0.9656297393124542  |
| XP_341500 | -1                  |
| XP_341501 | 1.487096165776899   |
| XP_341504 | 1.1299036852930158  |
| XP_341507 | 1.269831939492405   |
| XP_341509 | 1.2285287363275972  |
| XP_341510 | 0.9617506754584877  |
| XP_341511 | 0.9997962174392723  |
| XP_341517 | 1.0397858705535077  |
| XP_341518 | -1                  |
| XP_341520 | 1.2191164055214945  |
| XP_341521 | -1                  |
| XP_341523 | -1                  |
| XP_341524 | 1.031328785364941   |
| XP_341526 | 0.9696805441940946  |
| XP_341528 | 1.2437924978557724  |
| XP_341531 | -1                  |
| XP_341534 | 1.0703724921619844  |
| XP_341535 | 1.2197011933233104  |
| XP_341538 | 1.0285156015689338  |
| XP_341539 | 1.0452472358063436  |
| XP_341540 | 1.3413780343330763  |
| XP_341541 | -1                  |
| XP_341543 | 0.9952830301884091  |
| XP_341546 | 0.9049806599214741  |
| XP_341547 | 0.9822319792903624  |
| XP_341549 | -1                  |
| XP_341550 | 0.8327444902530617  |
| XP_341553 | 0.9456969539163111  |
| XP_341554 | 0.9210648644699972  |
| XP_341559 | 1.055504380927928   |
| XP_341568 | -1                  |

|           |                    |
|-----------|--------------------|
| XP_341569 | 1.1229821572280572 |
| XP_341571 | 0.9901906148498814 |
| XP_341572 | 0.9443297379796247 |
| XP_341574 | 0.8622366665816389 |
| XP_341575 | 1.0796488591235907 |
| XP_341580 | 1.0176204765343106 |
| XP_341581 | 0.9915984403809673 |
| XP_341583 | -1                 |
| XP_341585 | 0.9317866707036437 |
| XP_341586 | 0.9981761820526215 |
| XP_341588 | 0.9033117813469635 |
| XP_341589 | 0.9808103141754441 |
| XP_341593 | 1.0413882991448924 |
| XP_341594 | -1                 |
| XP_341597 | 0.6913683124119389 |
| XP_341601 | 0.9196431453879339 |
| XP_341606 | 1.0868475741642973 |
| XP_341609 | 1.0295351341762893 |
| XP_341611 | 1.061120070929149  |
| XP_341616 | 1.3729018636245123 |
| XP_341619 | 1.731864539427833  |
| XP_341620 | 1.0663557000235153 |
| XP_341622 | -1                 |
| XP_341623 | 0.7692956965021368 |
| XP_341624 | -1                 |
| XP_341630 | 0.9956217394514245 |
| XP_341631 | 1.0963643821714895 |
| XP_341637 | 0.9109775691792441 |
| XP_341642 | -1                 |
| XP_341644 | 0.8880789037309637 |
| XP_341650 | 2.960007188321937  |
| XP_341653 | 0.9702476483365264 |
| XP_341654 | 0.7389980134271319 |
| XP_341658 | 0.4559728940987146 |
| XP_341660 | -1                 |
| XP_341662 | 0.7842192749954219 |
| XP_341663 | 2.8321533637381973 |
| XP_341664 | 1.1610955697124445 |
| XP_341665 | 0.896365724544848  |
| XP_341667 | 1.3843316843924929 |
| XP_341668 | 1.209039374920686  |
| XP_341672 | 1.1040139975276193 |
| XP_341676 | -1                 |
| XP_341677 | 1.1752833059134125 |
| XP_341680 | 1.014002619922112  |
| XP_341684 | 1.2410920144518334 |
| XP_341689 | 0.9168726904792625 |
| XP_341690 | 1.3670809201852379 |
| XP_341692 | 1.8602819640623356 |
| XP_341694 | 0.6050522187641586 |
| XP_341703 | -1                 |
| XP_341704 | 0.9064119832386414 |
| XP_341705 | 1.1616163166493167 |
| XP_341709 | 1.3556802192339612 |
| XP_341710 | 1.6071810076992505 |
| XP_341715 | 0.8680157536744106 |
| XP_341716 | -1                 |
| XP_341717 | 1.0674879897678968 |
| XP_341720 | -1                 |
| XP_341722 | 1.3772501423678927 |
| XP_341723 | 0.8947889036103697 |
| XP_341725 | -1                 |

|           |                    |
|-----------|--------------------|
| XP_341727 | 0.8694338269743339 |
| XP_341728 | 1.2245170656787587 |
| XP_341730 | 0.8617375723697105 |
| XP_341731 | 0.6862025926083363 |
| XP_341733 | 0.8177432738158502 |
| XP_341734 | 1.122995232496536  |
| XP_341738 | -1                 |
| XP_341743 | 0.5986535132830424 |
| XP_341746 | 0.7126645154304126 |
| XP_341751 | 1.544977791295081  |
| XP_341756 | 1.4220540751105932 |
| XP_341758 | -1                 |
| XP_341760 | 1.1551346776774523 |
| XP_341763 | 1.4589611211779074 |
| XP_341764 | 1.1054274811965368 |
| XP_341765 | 0.6189671434531745 |
| XP_341773 | 1.1328157539834076 |
| XP_341774 | 0.7974827315697617 |
| XP_341780 | -1                 |
| XP_341782 | -1                 |
| XP_341785 | 0.7023820076979906 |
| XP_341786 | -1                 |
| XP_341789 | 1.135335173782847  |
| XP_341791 | 1.095706080325759  |
| XP_341796 | 1.0678230772961221 |
| XP_341797 | 0.7256521667770145 |
| XP_341800 | 1.0523846338516947 |
| XP_341801 | 1.1145512644769215 |
| XP_341802 | 0.9040906845834162 |
| XP_341804 | 1.0659191717294314 |
| XP_341805 | 1.1699973632823308 |
| XP_341806 | 0.9275190858418317 |
| XP_341809 | 1.2613730019988065 |
| XP_341810 | 1.0500916555328454 |
| XP_341812 | 0.7514351430928928 |
| XP_341813 | -1                 |
| XP_341816 | 1.1011209415382885 |
| XP_341818 | 1.3054438565967874 |
| XP_341819 | 1.1514027807422236 |
| XP_341823 | -1                 |
| XP_341825 | 0.9402643866524474 |
| XP_341826 | -1                 |
| XP_341829 | 1.2802691371654784 |
| XP_341830 | 1.0274163380281909 |
| XP_341832 | 0.9683344836497512 |
| XP_341833 | 0.9657096405218075 |
| XP_341835 | 1.362699017251282  |
| XP_341836 | 1.1795461039564343 |
| XP_341838 | -1                 |
| XP_341843 | 1.1312757264950215 |
| XP_341848 | 0.768546915949968  |
| XP_341849 | 1.4511135170877678 |
| XP_341851 | 0.7297057506708189 |
| XP_341852 | 1.1305287002023323 |
| XP_341853 | 0.9913836042589622 |
| XP_341855 | 0.6971120943828746 |
| XP_341858 | 1.1252235721225674 |
| XP_341861 | 0.8640284183595762 |
| XP_341862 | 1.123375843653126  |
| XP_341864 | 0.7634510725372438 |
| XP_341868 | 1.3313049816419922 |
| XP_341870 | 1.2239186759619605 |

|           |                    |
|-----------|--------------------|
| XP_341871 | 1.0706392961846969 |
| XP_341875 | 0.9436299434534596 |
| XP_341878 | 1.1054917131162199 |
| XP_341881 | -1                 |
| XP_341883 | -1                 |
| XP_341893 | 1.00716099013023   |
| XP_341894 | 1.0841557047427086 |
| XP_341895 | 1.5286551280059666 |
| XP_341896 | 1.1399058025408406 |
| XP_341897 | 1.4639453270242546 |
| XP_341902 | 1.7752139288807425 |
| XP_341903 | 1.1213394459311659 |
| XP_341907 | 1.1848193433419016 |
| XP_341912 | -1                 |
| XP_341913 | 1.2167517967261867 |
| XP_341916 | -1                 |
| XP_341917 | 1.0924764088878043 |
| XP_341922 | -1                 |
| XP_341925 | 1.220190728134724  |
| XP_341928 | 0.9775717316451872 |
| XP_341929 | 1.1226764181661544 |
| XP_341930 | 0.7985631636244874 |
| XP_341931 | 1.1932450868903792 |
| XP_341932 | -1                 |
| XP_341933 | 1.052081242889525  |
| XP_341935 | 1.2152778988381872 |
| XP_341937 | 0.6013574128328955 |
| XP_341938 | 1.0691701152198578 |
| XP_341941 | 1.2096664733797569 |
| XP_341942 | -1                 |
| XP_341944 | 1.1685016427085964 |
| XP_341948 | 0.9313108136272392 |
| XP_341950 | -1                 |
| XP_341951 | 1.2260165598165624 |
| XP_341953 | 1.9425840867129798 |
| XP_341954 | -1                 |
| XP_341956 | 1.1434940644578406 |
| XP_341958 | 0.6636995684043744 |
| XP_341959 | 2.1716791788763796 |
| XP_341966 | 1.0843211312445546 |
| XP_341967 | 3.137167457160256  |
| XP_341976 | -1                 |
| XP_341977 | 1.0445761043298383 |
| XP_341982 | 1.0221059866060633 |
| XP_341984 | 3.52996070145152   |
| XP_341993 | 1.0726917611494502 |
| XP_341995 | -1                 |
| XP_341996 | 0.9525214873109816 |
| XP_341997 | 1.2169307763181343 |
| XP_341998 | 0.9879948668826583 |
| XP_342001 | 1.052600362136751  |
| XP_342002 | 1.1674953963579413 |
| XP_342003 | 0.9664932503240545 |
| XP_342004 | 0.7158049329496623 |
| XP_342005 | 1.2682424842196214 |
| XP_342006 | 0.7707157949842949 |
| XP_342007 | 0.913553180703259  |
| XP_342008 | 1.3545370351370607 |
| XP_342012 | -1                 |
| XP_342014 | 0.8075437039745371 |
| XP_342016 | 1.2245898797497443 |
| XP_342021 | 0.9612390575193951 |

|           |                     |
|-----------|---------------------|
| XP_342023 | 0.7776735059142653  |
| XP_342024 | 0.9229418514392855  |
| XP_342025 | 0.8300778179755347  |
| XP_342026 | 0.9774538684538537  |
| XP_342027 | 0.9944418122152768  |
| XP_342029 | 1.0295795137127035  |
| XP_342031 | 0.17527095157870723 |
| XP_342032 | 0.9312321258209292  |
| XP_342033 | 1.265103892542901   |
| XP_342034 | 1.2524571938262352  |
| XP_342035 | -1                  |
| XP_342036 | 0.6198039265612744  |
| XP_342038 | 2.018616987228514   |
| XP_342040 | 1.0709349661559453  |
| XP_342043 | 0.8143815145096189  |
| XP_342045 | 0.8597046895388399  |
| XP_342052 | 0.9482548920834105  |
| XP_342058 | 1.0255158413131888  |
| XP_342066 | -1                  |
| XP_342069 | 1.2013927807853857  |
| XP_342074 | 8.774317757547077   |
| XP_342076 | 1.0860743477260535  |
| XP_342077 | 0.9746343373371419  |
| XP_342083 | 1.7707589576668372  |
| XP_342084 | 1.246391590060826   |
| XP_342086 | 1.4326743318856932  |
| XP_342087 | 1.2985918038205924  |
| XP_342092 | -1                  |
| XP_342093 | 1.0399741848976465  |
| XP_342094 | 1.33899466900429    |
| XP_342095 | 0.9860685147767696  |
| XP_342100 | 1.0943476083210382  |
| XP_342101 | 1.066791132836963   |
| XP_342102 | 0.9351932258355308  |
| XP_342103 | -1                  |
| XP_342104 | 0.9973028041868931  |
| XP_342105 | 1.4401801970367212  |
| XP_342108 | 1.073830831772496   |
| XP_342110 | 1.0058886296185907  |
| XP_342112 | -1                  |
| XP_342116 | 1.0558760707199388  |
| XP_342118 | 1.294566896823055   |
| XP_342119 | 1.305255581467794   |
| XP_342120 | 0.9993088089667747  |
| XP_342122 | -1                  |
| XP_342123 | 1.1926576222842902  |
| XP_342125 | -1                  |
| XP_342132 | 1.280592052092416   |
| XP_342143 | 1.2794930607934347  |
| XP_342144 | 1.2438834176174263  |
| XP_342150 | 1.2010914542753828  |
| XP_342161 | 1.7392983195885476  |
| XP_342169 | 1.2225585486099824  |
| XP_342173 | 1.0371133423682832  |
| XP_342175 | 1.0595011401363745  |
| XP_342180 | 0.9953308839863411  |
| XP_342182 | 0.5458999981649925  |
| XP_342184 | 1.1214855071081222  |
| XP_342186 | 1.034122469296185   |
| XP_342187 | 1.9923325173467366  |
| XP_342190 | 1.2801605255244208  |
| XP_342201 | 0.7660996988342929  |



|           |                    |
|-----------|--------------------|
| XP_342202 | 0.6426240043968529 |
| XP_342210 | 1.1747545986859196 |
| XP_342211 | 1.3305070779436998 |
| XP_342216 | 0.8415595135675343 |
| XP_342218 | 1.687232782323009  |
| XP_342219 | -1                 |
| XP_342220 | 1.0477569171125583 |
| XP_342221 | 2.34104868568606   |
| XP_342224 | 1.199321395839984  |
| XP_342226 | 0.8023220826211092 |
| XP_342232 | 0.7463753277627218 |
| XP_342233 | 1.1148730727483926 |
| XP_342239 | 1.277830997835366  |
| XP_342244 | 0.7191528782391307 |
| XP_342245 | 0.5366264385725662 |
| XP_342247 | 0.9934765882123867 |
| XP_342250 | 0.8444436214052923 |
| XP_342252 | -1                 |
| XP_342253 | 0.7910935148117924 |
| XP_342257 | -1                 |
| XP_342258 | 1.2167805798516698 |
| XP_342263 | 1.032444387762707  |
| XP_342264 | 1.1001762039054328 |
| XP_342269 | 1.0327025824516327 |
| XP_342275 | -1                 |
| XP_342279 | 1.1651708386172333 |
| XP_342280 | 0.89686009106204   |
| XP_342282 | -1                 |
| XP_342283 | 1.018604031011018  |
| XP_342289 | 1.0220689475049844 |
| XP_342292 | -1                 |
| XP_342294 | 1.0648219213034593 |
| XP_342296 | 1.179929452067438  |
| XP_342297 | 1.5003012556330262 |
| XP_342299 | 1.0281447589900277 |
| XP_342302 | 0.897569328643939  |
| XP_342304 | 1.2886446390971578 |
| XP_342307 | 1.171724155573358  |
| XP_342308 | 1.0909550650409507 |
| XP_342309 | 1.2201725360250453 |
| XP_342310 | 1.285430254490113  |
| XP_342311 | 0.7410186814843591 |
| XP_342318 | 0.9208893754688393 |
| XP_342319 | 1.065493978877131  |
| XP_342320 | 0.7149289475792724 |
| XP_342321 | -1                 |
| XP_342322 | 1.2898144575458574 |
| XP_342326 | -1                 |
| XP_342332 | 1.7082883316513808 |
| XP_342333 | 0.9994963862092064 |
| XP_342338 | 14.35243744938791  |
| XP_342341 | 1.0758303044705446 |
| XP_342342 | 0.7819618914160418 |
| XP_342343 | 1.1345044725530986 |
| XP_342345 | 1.0660913817750852 |
| XP_342346 | 0.923711494488178  |
| XP_342347 | 1.0711618572148018 |
| XP_342348 | 0.9374537182182429 |
| XP_342354 | 1.1136420060653327 |
| XP_342360 | 0.9772890957755251 |
| XP_342364 | 1.262572148029423  |
| XP_342365 | 1.1217674798220483 |

|           |                    |
|-----------|--------------------|
| XP_342369 | 1.0831854853418894 |
| XP_342370 | 0.6345346179823413 |
| XP_342375 | 1.1589181281484746 |
| XP_342383 | 0.5566583557368577 |
| XP_342385 | 1.183065812478992  |
| XP_342390 | 0.9992945887710052 |
| XP_342391 | 1.0506843776636563 |
| XP_342392 | 1.0666493611241088 |
| XP_342393 | 1.1992351587848122 |
| XP_342394 | 0.4685689789247626 |
| XP_342396 | 2.0466427319418408 |
| XP_342397 | 1.2046492014029608 |
| XP_342398 | 0.8483611234819103 |
| XP_342399 | 1.1244389809314443 |
| XP_342401 | 1.0789545318471208 |
| XP_342402 | 1.2404488638477338 |
| XP_342405 | 0.947646015689277  |
| XP_342409 | 1.5498623790958985 |
| XP_342410 | 0.7989728965454648 |
| XP_342413 | -1                 |
| XP_342416 | -1                 |
| XP_342418 | -1                 |
| XP_342421 | 1.0460022621523002 |
| XP_342431 | 1.0143227940124575 |
| XP_342433 | -1                 |
| XP_342439 | 1.3336890429748793 |
| XP_342441 | -1                 |
| XP_342444 | -1                 |
| XP_342451 | 1.0688467324914686 |
| XP_342453 | 0.7940212010535218 |
| XP_342455 | 1.037798815058337  |
| XP_342456 | -1                 |
| XP_342459 | 0.7039565773645866 |
| XP_342465 | -1                 |
| XP_342468 | 0.8229314178999299 |
| XP_342470 | 0.9455851586491069 |
| XP_342471 | -1                 |
| XP_342479 | 1.7734335869748994 |
| XP_342482 | -1                 |
| XP_342484 | 0.7716636561590225 |
| XP_342486 | 1.184687475905478  |
| XP_342489 | 0.7515453350115396 |
| XP_342492 | 0.9419622430398239 |
| XP_342494 | 2.7957887988479264 |
| XP_342495 | 1.007444886842277  |
| XP_342497 | 0.9701316606220775 |
| XP_342499 | 1.0236338578968753 |
| XP_342501 | 1.056617103005267  |
| XP_342503 | 0.7844986204798415 |
| XP_342513 | 0.9421504199784438 |
| XP_342517 | 1.2662763908957684 |
| XP_342518 | 0.9681600717595664 |
| XP_342521 | 0.7789853195404229 |
| XP_342522 | 0.6946801830232237 |
| XP_342523 | 1.1836689036056927 |
| XP_342527 | 1.1170525244641099 |
| XP_342529 | 1.4114265746699821 |
| XP_342530 | 1.2018888063693391 |
| XP_342531 | 0.9559478780221626 |
| XP_342532 | 1.2586547896997793 |
| XP_342534 | 1.1162845921764275 |
| XP_342535 | 1.0751124228976907 |

|           |                    |
|-----------|--------------------|
| XP_342536 | 1.7973150214666198 |
| XP_342543 | 1.0697914821259682 |
| XP_342553 | 1.1939523081299566 |
| XP_342554 | -1                 |
| XP_342556 | -1                 |
| XP_342558 | 1.4009788315968497 |
| XP_342559 | 0.8682979049779419 |
| XP_342561 | 1.2240171154596842 |
| XP_342563 | 1.0339163655626329 |
| XP_342564 | 1.2243617589538183 |
| XP_342568 | 0.8760286388143027 |
| XP_342571 | 1.190916170990945  |
| XP_342572 | 1.0609730878593904 |
| XP_342574 | 1.0706607250883184 |
| XP_342576 | -1                 |
| XP_342577 | -1                 |
| XP_342578 | 1.2045124373472074 |
| XP_342579 | 1.6182242646082772 |
| XP_342582 | 1.1433035628910644 |
| XP_342589 | 1.4489541912494015 |
| XP_342592 | 1.23941158430904   |
| XP_342595 | 1.6421441750605426 |
| XP_342602 | 1.3873528580237016 |
| XP_342608 | -1                 |
| XP_342609 | 1.7477953693355175 |
| XP_342613 | 1.246230320557704  |
| XP_342619 | 1.3044802162336033 |
| XP_342627 | -1                 |
| XP_342630 | 1.040637806545152  |
| XP_342631 | 1.2388406663382794 |
| XP_342632 | 1.5294493624093086 |
| XP_342633 | 1.2288668498294313 |
| XP_342637 | 1.4881341728792308 |
| XP_342639 | 1.0785183238285587 |
| XP_342641 | 1.221356888324163  |
| XP_342642 | 1.263058312942936  |
| XP_342643 | 0.9057481393372475 |
| XP_342644 | 1.7259852924507866 |
| XP_342645 | -1                 |
| XP_342647 | 1.0852025282205329 |
| XP_342648 | 1.14908321162671   |
| XP_342654 | 1.0239025467552623 |
| XP_342656 | 1.0819914797701027 |
| XP_342658 | 0.861907401548352  |
| XP_342662 | -1                 |
| XP_342663 | 1.149448326713417  |
| XP_342665 | 0.6801400868293174 |
| XP_342673 | 1.0147178596810258 |
| XP_342674 | 0.9015826666861683 |
| XP_342676 | 0.8079307319371936 |
| XP_342677 | 1.1058973441079958 |
| XP_342680 | 1.1290216664126749 |
| XP_342681 | 1.2981780364197089 |
| XP_342682 | 2.1906084735621225 |
| XP_342684 | 1.0397495169234714 |
| XP_342687 | 0.8071181381111687 |
| XP_342691 | 1.2668810256133853 |
| XP_342693 | 1.0585431585931524 |
| XP_342701 | 0.9681070788300213 |
| XP_342703 | 1.0219327523027355 |
| XP_342706 | 0.9255777600309892 |
| XP_342707 | -1                 |

|           |                    |
|-----------|--------------------|
| XP_342708 | -1                 |
| XP_342711 | 1.0558112703967273 |
| XP_342712 | 1.025519524852838  |
| XP_342713 | 1.0577513891497814 |
| XP_342715 | 0.7282018107368603 |
| XP_342718 | 0.9116015726475754 |
| XP_342722 | -1                 |
| XP_342730 | 0.5051473355446462 |
| XP_342732 | -1                 |
| XP_342736 | 0.7985049088000462 |
| XP_342737 | 2.004898332063711  |
| XP_342739 | 0.7793579348111032 |
| XP_342740 | -1                 |
| XP_342742 | 1.1248809199503713 |
| XP_342746 | 0.9096737865418691 |
| XP_342747 | 0.5356167764679687 |
| XP_342749 | 0.9893133525918689 |
| XP_342751 | 0.6532307814613746 |
| XP_342755 | 0.697751391400072  |
| XP_342756 | 0.7644007989092786 |
| XP_342758 | -1                 |
| XP_342759 | 1.24624331700079   |
| XP_342760 | 0.9208411831616783 |
| XP_342761 | 3.5676498273576764 |
| XP_342762 | 0.769386946295104  |
| XP_342763 | -1                 |
| XP_342764 | 0.94348425297765   |
| XP_342766 | 1.7863918065602236 |
| XP_342771 | -1                 |
| XP_342776 | 0.9460995501484738 |
| XP_342778 | 1.2017905417422805 |
| XP_342779 | 1.081676447255756  |
| XP_342780 | 1.502219229643363  |
| XP_342781 | -1                 |
| XP_342785 | 0.7559917033460885 |
| XP_342793 | 1.2923640331329325 |
| XP_342794 | 1.1781262970229007 |
| XP_342795 | -1                 |
| XP_342802 | 0.8639725505756697 |
| XP_342807 | 1.05002340103112   |
| XP_342813 | 1.0934273584508898 |
| XP_342816 | 1.2314147661493948 |
| XP_342817 | 1.0478792941234296 |
| XP_342821 | 1.0116516605804513 |
| XP_342823 | 1.0115257205089219 |
| XP_342824 | 4.968392723944186  |
| XP_342829 | 1.2115751736456468 |
| XP_342830 | 0.7007619294030194 |
| XP_342832 | -1                 |
| XP_342833 | 1.115923731622414  |
| XP_342834 | 1.0679291421845696 |
| XP_342835 | -1                 |
| XP_342836 | 0.8679288999326847 |
| XP_342837 | 1.2568539654648208 |
| XP_342841 | 1.159562012764177  |
| XP_342847 | 0.863479006312732  |
| XP_342849 | 1.1275467905787506 |
| XP_342851 | 0.648357476818311  |
| XP_342852 | 1.1305050842047195 |
| XP_342854 | 1.4406551978493398 |
| XP_342855 | 1.01302623331896   |
| XP_342856 | 1.1420986863362934 |

|           |                    |
|-----------|--------------------|
| XP_342857 | -1                 |
| XP_342858 | -1                 |
| XP_342859 | 1.2873405853491624 |
| XP_342867 | 1.016247131709988  |
| XP_342870 | 1.0189637518389703 |
| XP_342878 | 1.272587610533605  |
| XP_342885 | 0.7887285309649585 |
| XP_342886 | 1.25534760254605   |
| XP_342888 | 0.874116320949828  |
| XP_342889 | 0.6688764849293477 |
| XP_342894 | 1.0664916972258194 |
| XP_342895 | 0.8477238878657131 |
| XP_342896 | -1                 |
| XP_342897 | 0.9896601443422551 |
| XP_342898 | 0.7751629801695897 |
| XP_342904 | -1                 |
| XP_342906 | 1.4236705925875055 |
| XP_342908 | 0.7487937704353466 |
| XP_342909 | 1.4812341386117804 |
| XP_342910 | 1.3041878232577249 |
| XP_342912 | 1.130085032156346  |
| XP_342916 | 0.4489928889480532 |
| XP_342917 | 1.1359031482570414 |
| XP_342921 | 1.1110993661295163 |
| XP_342924 | 1.2080530359639068 |
| XP_342928 | 0.9620840920201824 |
| XP_342931 | -1                 |
| XP_342933 | 0.997586205892263  |
| XP_342937 | -1                 |
| XP_342940 | 0.4224426549451168 |
| XP_342942 | -1                 |
| XP_342949 | 1.1517142428722444 |
| XP_342950 | 1.0884369551883477 |
| XP_342952 | 1.1490691803098525 |
| XP_342953 | -1                 |
| XP_342958 | 0.8108821716101099 |
| XP_342959 | 0.821333860728756  |
| XP_342961 | 1.486090491255685  |
| XP_342962 | 1.1262618513923575 |
| XP_342963 | 1.2087223481577334 |
| XP_342964 | 0.898320490585188  |
| XP_342971 | 1.2870751407625913 |
| XP_342976 | -1                 |
| XP_342978 | -1                 |
| XP_342979 | 1.335228857351376  |
| XP_342980 | 1.4868322580258484 |
| XP_342981 | 1.1521525038484228 |
| XP_342983 | 1.1938069086148062 |
| XP_342985 | -1                 |
| XP_342986 | 1.1356716077216424 |
| XP_342989 | 1.2334978577950495 |
| XP_342995 | 0.8867269483987674 |
| XP_342996 | 1.1702962958981327 |
| XP_343001 | 1.3553643608402073 |
| XP_343003 | 0.849512025603082  |
| XP_343004 | 0.6559773144471653 |
| XP_343007 | 1.1885896121442476 |
| XP_343008 | 1.5885538121483842 |
| XP_343010 | 1.0401007756347964 |
| XP_343015 | 1.2873302044379296 |
| XP_343019 | 0.9445707256279668 |
| XP_343020 | 1.7657441412502488 |

|           |                    |
|-----------|--------------------|
| XP_343026 | 1.0020656781563377 |
| XP_343027 | -1                 |
| XP_343028 | 0.9238854793986984 |
| XP_343029 | 0.7712771311878708 |
| XP_343034 | -1                 |
| XP_343036 | -1                 |
| XP_343038 | 0.843818790300633  |
| XP_343040 | 1.4709436908522484 |
| XP_343045 | 1.0038866697344007 |
| XP_343046 | 2.7605482159082855 |
| XP_343047 | 0.7364437349408447 |
| XP_343049 | 1.0983059100950603 |
| XP_343058 | 1.0326255499124277 |
| XP_343060 | 0.968944628983264  |
| XP_343063 | 0.8628157334483777 |
| XP_343066 | 2.2399958965995825 |
| XP_343068 | 1.0415985585148955 |
| XP_343073 | 1.0680779309450779 |
| XP_343081 | 0.9532492383283886 |
| XP_343085 | 0.9781875878182795 |
| XP_343087 | 0.7813326609843284 |
| XP_343089 | 1.1521021043187245 |
| XP_343097 | 1.309511358358815  |
| XP_343099 | -1                 |
| XP_343100 | 1.0568403390041725 |
| XP_343104 | 0.6850442861003229 |
| XP_343108 | 0.9742458318425489 |
| XP_343113 | 0.8934754909394096 |
| XP_343114 | 1.917903454384754  |
| XP_343115 | 1.277418040362885  |
| XP_343116 | 0.9710391297514973 |
| XP_343119 | 1.0471246929509224 |
| XP_343120 | 1.1140847837731072 |
| XP_343122 | -1                 |
| XP_343123 | -1                 |
| XP_343128 | 1.4172272520547249 |
| XP_343130 | -1                 |
| XP_343131 | 1.904650028862567  |
| XP_343132 | 2.5057026976108765 |
| XP_343136 | 1.111867953084012  |
| XP_343138 | -1                 |
| XP_343139 | 1.007229346714261  |
| XP_343141 | 0.8427261563430483 |
| XP_343142 | 0.8686614851654277 |
| XP_343144 | 1.205568729413238  |
| XP_343145 | 0.941748832912038  |
| XP_343148 | 0.8153705833256439 |
| XP_343149 | -1                 |
| XP_343153 | 1.0201010450056414 |
| XP_343154 | 0.7707965516443582 |
| XP_343156 | 1.0523250684693506 |
| XP_343158 | 0.7485398883887343 |
| XP_343159 | 1.0425612145379024 |
| XP_343160 | 1.3693687007825768 |
| XP_343163 | 0.8061593953796615 |
| XP_343165 | 1.2801006922532636 |
| XP_343167 | 1.3136143438118255 |
| XP_343170 | 0.7709931360033297 |
| XP_343172 | -1                 |
| XP_343174 | 1.1317512722592644 |
| XP_343175 | 0.7902703795926943 |
| XP_343176 | 1.2919480272266413 |

|           |                     |
|-----------|---------------------|
| XP_343177 | 1.2426063230191522  |
| XP_343179 | 0.9639226948557269  |
| XP_343180 | 0.9567758603406719  |
| XP_343182 | -1                  |
| XP_343184 | 0.7531075528687606  |
| XP_343189 | 0.8169165143592432  |
| XP_343190 | 0.7273239377859952  |
| XP_343192 | 0.9053998980262448  |
| XP_343193 | 0.8347774366030585  |
| XP_343195 | 1.4495660322514528  |
| XP_343197 | -1                  |
| XP_343198 | -1                  |
| XP_343203 | -1                  |
| XP_343205 | 1.0579392933640412  |
| XP_343208 | 1.1379721106767617  |
| XP_343209 | 0.9850321311459855  |
| XP_343219 | -1                  |
| XP_343220 | 1.0105815754108398  |
| XP_343222 | 1.0474624730644617  |
| XP_343224 | 0.9824585983595432  |
| XP_343226 | 0.9833961952424662  |
| XP_343227 | 3.1431925569778922  |
| XP_343230 | 1.1045209158402671  |
| XP_343235 | 1.086221110398624   |
| XP_343243 | 0.8311368244446867  |
| XP_343245 | 0.6606262877409458  |
| XP_343249 | 1.2009357303170156  |
| XP_343250 | 1.1768478150481272  |
| XP_343251 | 1.5900687046674475  |
| XP_343252 | 0.9458715882988052  |
| XP_343256 | 1.0275889091410775  |
| XP_343257 | -1                  |
| XP_343260 | 0.835577340836891   |
| XP_343263 | 0.9177872838205414  |
| XP_343267 | 1.0012453885295707  |
| XP_343269 | 0.9810197911066234  |
| XP_343271 | 0.9095080349778168  |
| XP_343272 | 1.698701133031243   |
| XP_343273 | 0.968856391361447   |
| XP_343274 | 0.967913395546277   |
| XP_343275 | 0.910617421416553   |
| XP_343279 | 1.0778156142550244  |
| XP_343281 | 0.8197059118950553  |
| XP_343282 | 0.9880973397827916  |
| XP_343285 | -1                  |
| XP_343286 | 0.8875187730236132  |
| XP_343287 | 1.2011653005193896  |
| XP_343289 | 1.1461771747628295  |
| XP_343296 | 1.520247160400549   |
| XP_343297 | 0.880200263844506   |
| XP_343299 | 1.1730511287302754  |
| XP_343304 | 0.9692996182220992  |
| XP_343306 | 1.0988242262296082  |
| XP_343307 | -1                  |
| XP_343309 | 1.003958181052018   |
| XP_343314 | -1                  |
| XP_343315 | -1                  |
| XP_343320 | 1.003119321134653   |
| XP_343326 | -1                  |
| XP_343327 | 1.0126315213266754  |
| XP_343328 | 6.937465375544986   |
| XP_343330 | 0.31934150944530765 |

|           |                     |
|-----------|---------------------|
| XP_343332 | 1.2533717754284182  |
| XP_343333 | 1.0795975962780509  |
| XP_343334 | 1.7745367674071109  |
| XP_343335 | -1                  |
| XP_343337 | 1.4753138599614128  |
| XP_343338 | 1.1790674904378657  |
| XP_343339 | 1.064169534423076   |
| XP_343340 | 0.7664956836034503  |
| XP_343343 | 0.6970701469719374  |
| XP_343346 | 3.251902385152993   |
| XP_343347 | 0.8354331741713329  |
| XP_343352 | 1.1136294912126676  |
| XP_343355 | 0.9939048744953389  |
| XP_343356 | -1                  |
| XP_343357 | 1.1018173132057383  |
| XP_343359 | 1.0171131623318934  |
| XP_343360 | 1.0183896049441328  |
| XP_343364 | -1                  |
| XP_343366 | 1.070081609377228   |
| XP_343379 | 1.0822841983878255  |
| XP_343381 | -1                  |
| XP_343384 | 1.1942742816224778  |
| XP_343385 | -1                  |
| XP_343386 | 0.9099779884432571  |
| XP_343387 | 0.9851927910987884  |
| XP_343390 | 1.0871997445530284  |
| XP_343393 | 0.7981231019802989  |
| XP_343395 | -1                  |
| XP_343396 | 0.7603945295691918  |
| XP_343397 | 1.0163676618169386  |
| XP_343401 | -1                  |
| XP_343402 | 1.1445445816459692  |
| XP_343403 | 0.16520778399034927 |
| XP_343406 | 1.0483653439244618  |
| XP_343409 | 0.6577398873446545  |
| XP_343410 | 1.0099216131134205  |
| XP_343411 | 1.2784524029068929  |
| XP_343413 | 0.7977957917131282  |
| XP_343415 | -1                  |
| XP_343416 | 0.8500194106380019  |
| XP_343419 | 0.9450790137393468  |
| XP_343420 | 1.0024305743534774  |
| XP_343421 | 0.7450763035020087  |
| XP_343427 | 1.487822312454244   |
| XP_343428 | 1.4406418715357148  |
| XP_343435 | -1                  |
| XP_343439 | 1.8765133929862454  |
| XP_343440 | 1.130141886898282   |
| XP_343443 | 1.1830756568724603  |
| XP_343447 | 2.3419244104089643  |
| XP_343451 | 2.2679574711741237  |
| XP_343459 | 1.2346457072580772  |
| XP_343463 | -1                  |
| XP_343467 | 1.1291055688282947  |
| XP_343470 | 0.9397607022579219  |
| XP_343471 | -1                  |
| XP_343472 | -1                  |
| XP_343473 | 0.5187102940279779  |
| XP_343474 | 1.2335982092435214  |
| XP_343476 | 1.014808524623574   |
| XP_343479 | -1                  |
| XP_343480 | 10.112516590347807  |



|           |                     |
|-----------|---------------------|
| XP_343483 | 0.7539589972332553  |
| XP_343484 | 1.3752529284295092  |
| XP_343486 | -1                  |
| XP_343488 | 1.3657750067305985  |
| XP_343489 | 1.1584861180948367  |
| XP_343490 | 0.6957974013420415  |
| XP_343491 | 0.7462971625881546  |
| XP_343493 | -1                  |
| XP_343494 | -1                  |
| XP_343495 | 1.2456147105470228  |
| XP_343497 | 1.1664788610752683  |
| XP_343498 | -1                  |
| XP_343502 | 0.9240948997843814  |
| XP_343504 | 1.0805361042496615  |
| XP_343509 | 1.3721113093024477  |
| XP_343511 | 0.9108814538700879  |
| XP_343512 | 1.0281376162593832  |
| XP_343514 | 0.7065630933690605  |
| XP_343525 | 1.1829431544364044  |
| XP_343529 | 1.0788977246978153  |
| XP_343532 | 0.700508995565552   |
| XP_343538 | 1.0699159335648698  |
| XP_343554 | 1.0189856849855654  |
| XP_343556 | 1.363661438369619   |
| XP_343558 | -1                  |
| XP_343561 | 1.1826999271882792  |
| XP_343562 | 1.1771333438378144  |
| XP_343563 | -1                  |
| XP_343564 | 1.1123626697502722  |
| XP_343565 | 1.2931441660576153  |
| XP_343568 | -1                  |
| XP_343570 | 1.1851693244267663  |
| XP_343571 | 0.9030583291319751  |
| XP_343576 | -1                  |
| XP_343577 | 1.4823637322999048  |
| XP_343580 | 1.8631394251704911  |
| XP_343581 | 0.8885678174879453  |
| XP_343583 | -1                  |
| XP_343584 | 1.4603718700490826  |
| XP_343591 | 1.1047721968458644  |
| XP_343593 | 0.9763071849202936  |
| XP_343594 | 1.1659061316082335  |
| XP_343600 | 0.4767241663364688  |
| XP_343608 | 1.001459669310793   |
| XP_343610 | -1                  |
| XP_343614 | 1.1151837207543396  |
| XP_343617 | 0.7052030951675897  |
| XP_343626 | 1.7111403643236738  |
| XP_343629 | 0.9789394912060206  |
| XP_343630 | 1.0281687722446387  |
| XP_343631 | 0.9808906134748812  |
| XP_343632 | 0.9991713614493388  |
| XP_343640 | 1.0968116372299612  |
| XP_343644 | 0.965157586617896   |
| XP_343650 | 0.8973321631290698  |
| XP_343651 | 0.46888513215281846 |
| XP_343668 | 1.1203443558197559  |
| XP_343671 | 1.0035238717124964  |
| XP_343672 | 1.1998693617759915  |
| XP_343673 | 1.1599445813371834  |
| XP_343683 | 1.440061569576353   |
| XP_343710 | -1                  |

|           |                    |
|-----------|--------------------|
| XP_343712 | 1.4984817553350809 |
| XP_343733 | 0.792874571455663  |
| XP_343740 | -1                 |
| XP_343761 | 0.9456740143727727 |
| XP_343765 | 1.2694585105838598 |
| XP_343766 | 1.9364655807260907 |
| XP_343767 | 0.9902712595282632 |
| XP_343768 | -1                 |
| XP_343770 | 0.9919346304029646 |
| XP_343771 | -1                 |
| XP_343777 | 1.713151729685183  |
| XP_343779 | -1                 |
| XP_343780 | 0.9090375839058001 |
| XP_343790 | 1.9922821548861354 |
| XP_343791 | -1                 |
| XP_343794 | 0.9508413320988142 |
| XP_343796 | 1.1499695051342425 |
| XP_343797 | -1                 |
| XP_343798 | 1.0918980406932552 |
| XP_343800 | 0.867847702760428  |
| XP_343801 | 0.9837043980083324 |
| XP_343808 | -1                 |
| XP_343809 | 0.7717473132773205 |
| XP_343813 | 1.2678531853433277 |
| XP_343819 | 1.0363892982249967 |
| XP_343823 | -1                 |
| XP_343824 | 1.1034063111512051 |
| XP_343832 | 1.5229955979506935 |
| XP_343834 | 0.9294216742220853 |
| XP_343836 | 0.9249172252438099 |
| XP_343840 | -1                 |
| XP_343843 | 1.0126345410573425 |
| XP_343844 | 0.6672968151486947 |
| XP_343845 | 0.6682786510676145 |
| XP_343857 | 1.0238039731786974 |
| XP_343859 | 1.12455396916109   |
| XP_343861 | 1.143056749389441  |
| XP_343862 | -1                 |
| XP_343868 | 0.9758073673507551 |
| XP_343869 | 0.6699190412211902 |
| XP_343870 | 0.7954537934933507 |
| XP_343871 | 0.8449662755735433 |
| XP_343873 | 1.0310499772637138 |
| XP_343891 | 1.0199792151161908 |
| XP_343900 | 1.0543775240601183 |
| XP_343903 | -1                 |
| XP_343912 | -1                 |
| XP_343920 | 1.3535305823879467 |
| XP_343923 | 1.0111169264302846 |
| XP_343936 | 0.8391603035316463 |
| XP_343939 | 1.3371616070250634 |
| XP_343946 | 0.8792408208436768 |
| XP_343949 | 1.3325020846389077 |
| XP_343953 | 1.0604903021811245 |
| XP_343955 | 1.4855972440692713 |
| XP_343956 | 0.840585124646232  |
| XP_343957 | 0.9849473079189978 |
| XP_343961 | 0.7088991786344859 |
| XP_343963 | -1                 |
| XP_343967 | 0.9325134596714967 |
| XP_343983 | -1                 |
| XP_343985 | 0.9916633564389962 |

|           |                    |
|-----------|--------------------|
| XP_343987 | 0.9316567497513096 |
| XP_343989 | 0.8851049191676985 |
| XP_343990 | 0.7427254605475406 |
| XP_343992 | -1                 |
| XP_343999 | 1.0232151505868217 |
| XP_344000 | 1.4179429722761112 |
| XP_344006 | 0.6227383868519673 |
| XP_344010 | 1.4924381647363385 |
| XP_344017 | 0.8302853560629218 |
| XP_344034 | 0.9721755869164923 |
| XP_344036 | 1.9791202402545582 |
| XP_344040 | 1.051226442824232  |
| XP_344041 | 1.3140068677039711 |
| XP_344043 | 0.9121991077803627 |
| XP_344045 | 0.9922522795137041 |
| XP_344047 | 0.9101011823786916 |
| XP_344048 | 1.0661575022036744 |
| XP_344057 | 1.0291895131487319 |
| XP_344058 | 1.1799295052415386 |
| XP_344061 | -1                 |
| XP_344067 | 0.8087642616869651 |
| XP_344071 | -1                 |
| XP_344077 | -1                 |
| XP_344078 | 0.8371579695469151 |
| XP_344083 | 1.1510390888248914 |
| XP_344086 | 0.7461800103084423 |
| XP_344091 | 0.8793505373976135 |
| XP_344092 | 0.290360124578007  |
| XP_344098 | -1                 |
| XP_344106 | 0.682498590558917  |
| XP_344119 | 1.2521626177769603 |
| XP_344131 | 1.0143039145370176 |
| XP_344135 | 0.9217821327627411 |
| XP_344136 | 1.043224924451525  |
| XP_344147 | 0.3094486435496945 |
| XP_344151 | 1.5240238175713785 |
| XP_344168 | 0.8858075686234149 |
| XP_344181 | 0.6647051257370941 |
| XP_344183 | 0.8248132294900451 |
| XP_344190 | 0.3336982031247153 |
| XP_344192 | 1.9865323700547777 |
| XP_344195 | 2.825638512608086  |
| XP_344196 | 0.69830622525834   |
| XP_344199 | 1.0738729349737404 |
| XP_344205 | 1.2849541024462334 |
| XP_344206 | 1.414787246342019  |
| XP_344208 | 0.9774378116040694 |
| XP_344231 | 1.6419448265569683 |
| XP_344232 | 1.3153530503529567 |
| XP_344236 | -1                 |
| XP_344239 | -1                 |
| XP_344253 | -1                 |
| XP_344256 | 0.8680062216850182 |
| XP_344258 | 0.9665197009633273 |
| XP_344259 | 0.7479238301500754 |
| XP_344260 | 1.380132086351312  |
| XP_344261 | 1.0668424902962084 |
| XP_344262 | 1.5487335330769    |
| XP_344268 | 1.5661798224944359 |
| XP_344269 | 1.0810759316488212 |
| XP_344272 | 1.127275780823661  |
| XP_344276 | 1.0278944032088908 |

|           |                    |
|-----------|--------------------|
| XP_344278 | 1.1186869700411266 |
| XP_344280 | 1.3819440963831768 |
| XP_344285 | 1.1618590081698512 |
| XP_344297 | 1.1405878122935695 |
| XP_344311 | 1.0927593529446111 |
| XP_344312 | 1.326043474329589  |
| XP_344323 | 1.1552663312950575 |
| XP_344329 | 1.0787070766697966 |
| XP_344373 | 0.7593183853217278 |
| XP_344389 | 1.0638246092224843 |
| XP_344392 | -1                 |
| XP_344403 | 1.0527917004216483 |
| XP_344405 | 0.8108703660608518 |
| XP_344406 | 0.8353940766878033 |
| XP_344407 | -1                 |
| XP_344410 | 1.1732457818450273 |
| XP_344415 | 0.9282737954657311 |
| XP_344426 | 0.899045707990584  |
| XP_344435 | 1.444446992848654  |
| XP_344436 | 1.5696003460783137 |
| XP_344441 | -1                 |
| XP_344444 | 1.1386675543086289 |
| XP_344456 | 0.8538831180116646 |
| XP_344459 | 0.9662511368215937 |
| XP_344463 | 0.8349752948752845 |
| XP_344470 | 1.1109395327631302 |
| XP_344473 | 1.263551876369837  |
| XP_344480 | 0.8571687183197056 |
| XP_344483 | 1.2251999613375741 |
| XP_344490 | 0.747965792917857  |
| XP_344491 | 0.7271525521954011 |
| XP_344492 | 0.8587628744124114 |
| XP_344494 | 0.8606716079070612 |
| XP_344495 | 1.058532451793156  |
| XP_344496 | 0.8438650419438778 |
| XP_344500 | -1                 |
| XP_344503 | 0.9864454989443252 |
| XP_344506 | 0.6340510622567933 |
| XP_344524 | 1.0955424371976394 |
| XP_344525 | 1.32352846966794   |
| XP_344530 | 1.330628911079784  |
| XP_344531 | 1.0109893810849178 |
| XP_344538 | 1.0895490164147286 |
| XP_344539 | 1.1231340623263721 |
| XP_344543 | 1.105996223593338  |
| XP_344545 | 0.7043200733683254 |
| XP_344551 | 1.082820255596663  |
| XP_344554 | 0.9345493220400454 |
| XP_344557 | -1                 |
| XP_344568 | 0.8921077085692901 |
| XP_344569 | 0.9329964356409294 |
| XP_344571 | 0.9185769996769159 |
| XP_344572 | 1.1072735443427344 |
| XP_344575 | 0.8363430143129497 |
| XP_344581 | -1                 |
| XP_344590 | 0.9698700199542373 |
| XP_344595 | 1.1779000777402908 |
| XP_344596 | 0.5210543752171618 |
| XP_344600 | 0.9314226643996935 |
| XP_344603 | -1                 |
| XP_344612 | 1.4302452951837432 |
| XP_344617 | 1.4428857122171959 |

|           |                      |
|-----------|----------------------|
| XP_344619 | 0.9814718556010003   |
| XP_344626 | -1                   |
| XP_344628 | -1                   |
| XP_344629 | 1.4076240842853398   |
| XP_344634 | -1                   |
| XP_344639 | 1.017563946983107    |
| XP_344649 | 1.0796687950959558   |
| XP_344650 | 0.020713723932974024 |
| XP_344657 | -1                   |
| XP_344662 | 0.9290324330115758   |
| XP_344668 | -1                   |
| XP_344669 | 1.70976832985916     |
| XP_344670 | 0.8720541305457554   |
| XP_344674 | 0.8567904699534402   |
| XP_344686 | 1.2350376039905862   |
| XP_344692 | 1.025952030065934    |
| XP_344695 | 0.8932321685694906   |
| XP_344696 | 1.2451922987150217   |
| XP_344697 | -1                   |
| XP_344704 | 1.7895147738912502   |
| XP_344708 | 1.2729479074438277   |
| XP_344711 | 0.9280252618397895   |
| XP_344715 | 1.066859514974895    |
| XP_344719 | 1.2586112768088493   |
| XP_344723 | 0.7793583207738088   |
| XP_344724 | 1.0255838539793067   |
| XP_344729 | -1                   |
| XP_344738 | -1                   |
| XP_344743 | -1                   |
| XP_344744 | 1.4699820581371608   |
| XP_344745 | 1.0550640238577373   |
| XP_344751 | 1.4644257946799755   |
| XP_344755 | 1.38995116807207     |
| XP_344757 | 0.713670074348905    |
| XP_344763 | 0.8022915778917675   |
| XP_344764 | -1                   |
| XP_344768 | -1                   |
| XP_344777 | -1                   |
| XP_344783 | 0.9324702242349758   |
| XP_344784 | 1.187858270989933    |
| XP_344786 | 1.287946886403831    |
| XP_344788 | 1.1470294370364613   |
| XP_344792 | 1.1332703051225381   |
| XP_344796 | -1                   |
| XP_344799 | 1.1753385061274393   |
| XP_344805 | -1                   |
| XP_344806 | 1.1876619031059155   |
| XP_344808 | 1.2481973327677283   |
| XP_344811 | -1                   |
| XP_344819 | 0.7070488322609348   |
| XP_344828 | 1.6921838573539991   |
| XP_344831 | 1.1667164999074853   |
| XP_344838 | 1.1500803085066      |
| XP_344845 | 0.893552845365763    |
| XP_344848 | 1.091494519023083    |
| XP_344856 | -1                   |
| XP_344857 | -1                   |
| XP_344859 | 1.0832382576958495   |
| XP_344861 | 1.0072001596061737   |
| XP_344862 | 1.1770993370057123   |
| XP_344863 | 1.3719008804994024   |
| XP_344864 | 1.564404701899722    |

|           |                    |
|-----------|--------------------|
| XP_344870 | 0.783370579808019  |
| XP_344875 | 1.1274202795108177 |
| XP_344880 | 0.8744729209890214 |
| XP_344888 | 0.8306376308183404 |
| XP_344889 | 1.323669429044452  |
| XP_344890 | 1.2725618020296896 |
| XP_344891 | 1.0899782674130967 |
| XP_344896 | 0.9852959118815594 |
| XP_344902 | 0.9633056596937825 |
| XP_344904 | 0.9914806716896528 |
| XP_344909 | 1.068619682852724  |
| XP_344911 | 1.064911589074481  |
| XP_344916 | 1.1259666489258067 |
| XP_344917 | -1                 |
| XP_344924 | 0.9017414229786987 |
| XP_344926 | 1.1613517300531708 |
| XP_344935 | 0.9675762311227004 |
| XP_344943 | -1                 |
| XP_344944 | 1.0216749993009477 |
| XP_344948 | -1                 |
| XP_344953 | -1                 |
| XP_344958 | 0.775863076185515  |
| XP_344962 | 0.7468916311872015 |
| XP_344964 | 2.552265861403935  |
| XP_344965 | 26.38274736244219  |
| XP_344970 | 1.022767791284697  |
| XP_344972 | 1.206007193316856  |
| XP_344973 | 1.0038674659848887 |
| XP_344977 | 1.0132805804746665 |
| XP_344978 | -1                 |
| XP_344980 | 1.4141788775145223 |
| XP_344982 | 0.9966728675205679 |
| XP_344984 | 0.7490287433773158 |
| XP_344985 | 1.3377597946349196 |
| XP_344987 | -1                 |
| XP_344993 | 1.2255018441249732 |
| XP_345002 | 1.1597978119825851 |
| XP_345010 | 0.9128146278314425 |
| XP_345013 | 1.012701900127379  |
| XP_345030 | 1.172698346675079  |
| XP_345032 | 0.9229657958151467 |
| XP_345033 | 0.9732946051920415 |
| XP_345034 | 0.9523641002664406 |
| XP_345039 | 1.6480385146332577 |
| XP_345041 | 0.9424014637869886 |
| XP_345042 | 1.0281549655975735 |
| XP_345047 | 0.8366633358888654 |
| XP_345051 | 0.9007854634451501 |
| XP_345061 | 0.7547798774955171 |
| XP_345064 | 1.4291534958658714 |
| XP_345065 | 1.195038915488689  |
| XP_345068 | -1                 |
| XP_345076 | 1.0102652845816145 |
| XP_345077 | 2.222304066205148  |
| XP_345080 | 1.0420584900185241 |
| XP_345083 | 0.8328886563034753 |
| XP_345088 | 0.9143485463061639 |
| XP_345092 | 0.7328647205086632 |
| XP_345093 | -1                 |
| XP_345106 | 1.2341068576018392 |
| XP_345107 | 1.0666200621413673 |
| XP_345110 | 1.2208573100471911 |

|           |                     |
|-----------|---------------------|
| XP_345112 | -1                  |
| XP_345113 | 1.2133704946467037  |
| XP_345114 | 1.1695751496863358  |
| XP_345115 | 2.210719234062027   |
| XP_345118 | 1.1328540359330124  |
| XP_345138 | 1.1711157294360417  |
| XP_345139 | -1                  |
| XP_345140 | 0.7682061926716491  |
| XP_345141 | 1.0782756222567056  |
| XP_345144 | 1.0091528002067875  |
| XP_345145 | -1                  |
| XP_345148 | 1.19764590137379    |
| XP_345151 | 1.1912014970019948  |
| XP_345152 | 1.0761606988660029  |
| XP_345154 | 1.2088163798588423  |
| XP_345160 | 1.1789713772527082  |
| XP_345161 | 1.0978668111232137  |
| XP_345162 | 0.8059904039076428  |
| XP_345176 | 0.9479020263482812  |
| XP_345178 | -1                  |
| XP_345179 | 1.0028049239006416  |
| XP_345185 | -1                  |
| XP_345186 | 1.1617568749989944  |
| XP_345191 | 1.8836023688334957  |
| XP_345201 | 1.2297378406370183  |
| XP_345212 | 0.9400674438271649  |
| XP_345216 | 0.8532326928565491  |
| XP_345225 | 1.1169166607876906  |
| XP_345230 | 1.0841152161798322  |
| XP_345233 | 1.1734996372806983  |
| XP_345236 | 0.5107001793958607  |
| XP_345237 | 1.449873772567397   |
| XP_345238 | 1.2762134677005548  |
| XP_345247 | 0.9548100343284243  |
| XP_345250 | -1                  |
| XP_345254 | 0.5691378514964529  |
| XP_345256 | 0.7435475858049001  |
| XP_345260 | 0.9187441537823272  |
| XP_345271 | 0.7084318421130266  |
| XP_345273 | 1.167128173715157   |
| XP_345289 | 1.0329431112782905  |
| XP_345300 | 0.46783471315211145 |
| XP_345302 | 1.206878519023572   |
| XP_345305 | -1                  |
| XP_345319 | 1.4674879772617102  |
| XP_345320 | 1.6904798438919244  |
| XP_345324 | 1.112245925848335   |
| XP_345325 | 1.1755620025550406  |
| XP_345333 | 0.8355377271012204  |
| XP_345336 | 0.9244654885805668  |
| XP_345340 | 0.3825183009262953  |
| XP_345341 | 0.628351918389144   |
| XP_345348 | 1.0273320847888727  |
| XP_345349 | -1                  |
| XP_345358 | 1.283536905845055   |
| XP_345382 | 1.0384909732593177  |
| XP_345393 | -1                  |
| XP_345402 | 1.1790999634762371  |
| XP_345403 | -1                  |
| XP_345404 | -1                  |
| XP_345410 | 1.2767105661995881  |
| XP_345411 | 0.7907630943156678  |

|           |                    |
|-----------|--------------------|
| XP_345414 | 0.9116721793089653 |
| XP_345418 | 0.9676656678728351 |
| XP_345419 | 0.9638930272205183 |
| XP_345420 | -1                 |
| XP_345427 | 1.073484577742774  |
| XP_345432 | 0.9636960309793902 |
| XP_345439 | 1.5719548464895645 |
| XP_345442 | 1.5388635504848989 |
| XP_345445 | -1                 |
| XP_345446 | 0.8584703889000463 |
| XP_345450 | -1                 |
| XP_345455 | -1                 |
| XP_345457 | 0.5315537918709855 |
| XP_345462 | 1.485505480063039  |
| XP_345463 | 0.8009589815124658 |
| XP_345469 | 0.7063452210460922 |
| XP_345481 | 1.1547976137555702 |
| XP_345483 | 0.9096104100595032 |
| XP_345486 | 1.003304413387799  |
| XP_345487 | 1.276545513646618  |
| XP_345488 | 0.883568854105729  |
| XP_345495 | 1.0141499384518833 |
| XP_345509 | 2.384986670902421  |
| XP_345510 | 0.8513801124695366 |
| XP_345511 | -1                 |
| XP_345512 | 1.5480177984534496 |
| XP_345518 | 0.813996640111195  |
| XP_345519 | 1.1690135045562753 |
| XP_345523 | -1                 |
| XP_345525 | 1.0714075591549097 |
| XP_345526 | 0.8329885035327135 |
| XP_345529 | 1.1325848042249251 |
| XP_345530 | 2.2165841955833128 |
| XP_345536 | 0.968747766068509  |
| XP_345538 | 0.8489166629478163 |
| XP_345541 | 0.8760915108213798 |
| XP_345543 | 0.7388869088815468 |
| XP_345562 | 0.9576237603327987 |
| XP_345568 | 1.6612924404988745 |
| XP_345570 | -1                 |
| XP_345571 | 0.8172346192567886 |
| XP_345573 | 1.2074368198625554 |
| XP_345578 | 0.9557363587198102 |
| XP_345582 | 0.8872157446228006 |
| XP_345584 | 1.2105880588846902 |
| XP_345585 | 0.9555189308574412 |
| XP_345590 | 1.0917096497971708 |
| XP_345592 | -1                 |
| XP_345596 | 1.0544830616166285 |
| XP_345601 | 0.7980332922820357 |
| XP_345604 | -1                 |
| XP_345607 | 1.0215965813750068 |
| XP_345616 | 1.0688773429460012 |
| XP_345626 | 0.9518303355045363 |
| XP_345628 | 1.2248073680094111 |
| XP_345629 | 1.2012925197731161 |
| XP_345631 | 1.3045700504763384 |
| XP_345634 | 2.2946109052781467 |
| XP_345640 | -1                 |
| XP_345642 | 0.8494093316580432 |
| XP_345643 | 1.0680019128875808 |
| XP_345644 | 0.8033937703725629 |



|           |                    |
|-----------|--------------------|
| XP_345647 | 2.774910091925083  |
| XP_345652 | 1.056100806699982  |
| XP_345670 | 1.1749416258932803 |
| XP_345672 | 0.7775518409258404 |
| XP_345675 | 1.2730855836849553 |
| XP_345690 | 1.791511610111279  |
| XP_345698 | 1.0590510526288637 |
| XP_345704 | 1.1307867556318452 |
| XP_345708 | 1.0039659429758057 |
| XP_345710 | 1.044107938538194  |
| XP_345726 | 1.1354084053402738 |
| XP_345735 | 1.1616838434069836 |
| XP_345739 | 0.8814811391438934 |
| XP_345741 | 0.9230107241048445 |
| XP_345764 | 1.1110886039964731 |
| XP_345765 | 1.7039414380796003 |
| XP_345786 | -1                 |
| XP_345790 | -1                 |
| XP_345791 | -1                 |
| XP_345800 | 1.113410631762285  |
| XP_345801 | 1.5246193378203377 |
| XP_345802 | 1.0558040155992359 |
| XP_345804 | -1                 |
| XP_345805 | -1                 |
| XP_345807 | 0.9938993161453343 |
| XP_345814 | 1.2368256961528388 |
| XP_345833 | 1.1857200812111282 |
| XP_345836 | 0.9921903560705255 |
| XP_345842 | 1.338113473732531  |
| XP_345845 | 1.1346249340402037 |
| XP_345849 | -1                 |
| XP_345850 | 1.0394816353697784 |
| XP_345851 | 0.983300035804212  |
| XP_345857 | 0.6880648415143952 |
| XP_345861 | -1                 |
| XP_345862 | 0.9629168615372549 |
| XP_345863 | 0.9678937120420121 |
| XP_345864 | 0.9693469162293457 |
| XP_345866 | 1.2178784708447277 |
| XP_345867 | 0.9603630807300259 |
| XP_345869 | 0.6824596273743911 |
| XP_345871 | 0.7973085434771425 |
| XP_345875 | 1.828254244700834  |
| XP_345876 | 1.3456709522858492 |
| XP_345877 | 1.202490080950117  |
| XP_345880 | -1                 |
| XP_345881 | 1.0477338458038175 |
| XP_345896 | -1                 |
| XP_345908 | 0.9736544787524719 |
| XP_345910 | 0.8529180765595004 |
| XP_345917 | 0.9846818681321018 |
| XP_345919 | 2.095863487504786  |
| XP_345933 | 0.9916020211093407 |
| XP_345937 | 0.9605127647996694 |
| XP_345939 | 1.124968121462045  |
| XP_345940 | -1                 |
| XP_345941 | -1                 |
| XP_345943 | 0.838310241972589  |
| XP_345947 | -1                 |
| XP_345948 | 1.0574156665539578 |
| XP_345958 | 0.9417891962123138 |
| XP_345972 | 0.9661997435618326 |

|           |                    |
|-----------|--------------------|
| XP_345974 | -1                 |
| XP_345976 | -1                 |
| XP_345981 | 0.9228101867987846 |
| XP_345984 | -1                 |
| XP_345985 | 1.3977474834524493 |
| XP_345986 | 1.1285445863967964 |
| XP_345995 | 1.7319029972534583 |
| XP_346008 | 1.156399047797566  |
| XP_346013 | 1.0668323439742302 |
| XP_346018 | 1.4965826882992783 |
| XP_346021 | 1.0960069262408016 |
| XP_346028 | 1.2829371005174128 |
| XP_346029 | 1.0560121701710747 |
| XP_346040 | -1                 |
| XP_346041 | 0.9317532144522657 |
| XP_346047 | -1                 |
| XP_346054 | 1.0015267392149645 |
| XP_346061 | 0.828781978506882  |
| XP_346062 | 1.0426342376503277 |
| XP_346069 | 1.0085605701826366 |
| XP_346070 | 0.9252708573107338 |
| XP_346071 | 1.1670354872382642 |
| XP_346073 | 1.0469318120969193 |
| XP_346074 | 0.8442372213963395 |
| XP_346075 | 1.6227286632931381 |
| XP_346078 | 0.8926010583480992 |
| XP_346079 | -1                 |
| XP_346084 | 1.1968120213412414 |
| XP_346086 | 0.9237511625174863 |
| XP_346090 | 1.210797709884966  |
| XP_346093 | 1.0769374681072932 |
| XP_346097 | 1.0907083846400591 |
| XP_346101 | 1.066558082112495  |
| XP_346111 | -1                 |
| XP_346120 | 1.3141210133475538 |
| XP_346123 | 0.8921356410777577 |
| XP_346124 | 1.0297946995405256 |
| XP_346140 | 1.6251780202966575 |
| XP_346144 | 0.9803590562551637 |
| XP_346159 | 1.2577809512136133 |
| XP_346166 | 0.7550611899077143 |
| XP_346174 | -1                 |
| XP_346207 | 4.490291420829757  |
| XP_346231 | 0.7720431240325324 |
| XP_346236 | -1                 |
| XP_346238 | 1.0952250310910012 |
| XP_346248 | 3.0817006759624435 |
| XP_346254 | 1.150210222064984  |
| XP_346258 | 0.9095154327588375 |
| XP_346259 | 1.2426964927858803 |
| XP_346280 | 1.6917338377562299 |
| XP_346281 | 1.1899567056813478 |
| XP_346282 | -1                 |
| XP_346302 | -1                 |
| XP_346304 | 0.7844727085709591 |
| XP_346308 | 1.1296993380175129 |
| XP_346313 | 0.9534324641292072 |
| XP_346317 | 1.191401586841281  |
| XP_346329 | 1.0639653387066923 |
| XP_346330 | 1.0639456832190421 |
| XP_346331 | -1                 |
| XP_346346 | 0.3127897333251646 |

|           |                     |
|-----------|---------------------|
| XP_346347 | 1.1532008562414817  |
| XP_346349 | 1.1382262300427728  |
| XP_346350 | 0.8910514077239696  |
| XP_346363 | 1.060305456914926   |
| XP_346367 | 1.0158003348087186  |
| XP_346368 | 1.1093536122084642  |
| XP_346373 | 1.148016766637437   |
| XP_346377 | 1.1720408225492278  |
| XP_346381 | -1                  |
| XP_346392 | 1.3336064377802348  |
| XP_346394 | -1                  |
| XP_346398 | 1.1260342441936737  |
| XP_346403 | 0.7484873636384105  |
| XP_346410 | -1                  |
| XP_346448 | 1.2072300536280984  |
| XP_346453 | 0.8484035718625424  |
| XP_346474 | -1                  |
| XP_346482 | 0.7235330409385957  |
| XP_346492 | -1                  |
| XP_346509 | -1                  |
| XP_346524 | 0.7729284621722542  |
| XP_346535 | 0.8394640520572215  |
| XP_346565 | 1.095328358471708   |
| XP_346567 | 1.4465902919520457  |
| XP_346583 | 0.649445887820026   |
| XP_346590 | 0.9912641262223314  |
| XP_346600 | 1.0955797762771287  |
| XP_346603 | 0.8904131384708828  |
| XP_346612 | 1.0603916314231048  |
| XP_346623 | 4.62391313442231    |
| XP_346624 | 0.9845491925891107  |
| XP_346635 | 1.0527250593225388  |
| XP_346638 | 2.149441341074916   |
| XP_346646 | 1.0900027353425232  |
| XP_346650 | 1.4693984686528359  |
| XP_346673 | 1.251255498508817   |
| XP_346680 | 0.9134351876413332  |
| XP_346694 | 1.1488010696065376  |
| XP_346702 | -1                  |
| XP_346706 | 1.407455401874375   |
| XP_346708 | 0.593983758820127   |
| XP_346711 | 1.331039560628874   |
| XP_346732 | -1                  |
| XP_346740 | 0.9209648384112906  |
| XP_346749 | 0.9082373867982918  |
| XP_346754 | 1.6202482558325866  |
| XP_346794 | 0.35830196680847176 |
| XP_346797 | -1                  |
| XP_346804 | 0.8648711858551815  |
| XP_346811 | 0.8528394713561426  |
| XP_346813 | 1.0570471620795705  |
| XP_346818 | -1                  |
| XP_346836 | 1.1550521406119587  |
| XP_346849 | -1                  |
| XP_346854 | -1                  |
| XP_346872 | 0.8902499649797208  |
| XP_346882 | 0.8652574793094319  |
| XP_346885 | -1                  |
| XP_346886 | -1                  |
| XP_346889 | 1.6456883814128103  |
| XP_346890 | 1.0035334827135773  |
| XP_346893 | 0.978688169572095   |

|           |                    |
|-----------|--------------------|
| XP_346901 | 0.86955972007102   |
| XP_346904 | 0.905207996224933  |
| XP_346912 | 1.1749365583245204 |
| XP_346915 | 1.3646714165095164 |
| XP_346916 | 1.0240632272065826 |
| XP_346920 | 1.003368453916357  |
| XP_346921 | -1                 |
| XP_346928 | 0.9738235069936371 |
| XP_346934 | 1.4885951421511125 |
| XP_346951 | 1.0011450142417664 |
| XP_346952 | 1.2388460332755866 |
| XP_346955 | 0.2093893676737657 |
| XP_346957 | 1.8093110478068122 |
| XP_346962 | -1                 |
| XP_346964 | 0.5743124256361627 |
| XP_346966 | -1                 |
| XP_346967 | 1.3823964505900292 |
| XP_346970 | 1.1419202438952596 |
| XP_346971 | -1                 |
| XP_346991 | 1.3862520114886978 |
| XP_346994 | 0.9067470034628147 |
| XP_346997 | 1.0537810834765924 |
| XP_346998 | 1.3424658947176944 |
| XP_346999 | 0.9370492967178565 |
| XP_347001 | -1                 |
| XP_347003 | 1.2030456615881502 |
| XP_347004 | 1.2970345727338564 |
| XP_347009 | 1.11079303952082   |
| XP_347011 | -1                 |
| XP_347017 | 0.7274766292755291 |
| XP_347021 | 1.0692079568055217 |
| XP_347025 | 1.0135924454292624 |
| XP_347039 | 0.9922464161484547 |
| XP_347041 | 1.160483271909822  |
| XP_347046 | -1                 |
| XP_347049 | -1                 |
| XP_347055 | 1.3297709637253663 |
| XP_347056 | 1.1140070675475857 |
| XP_347057 | 0.8503709591866717 |
| XP_347060 | 0.9567468143698673 |
| XP_347061 | 1.16681334456917   |
| XP_347063 | 0.9018929024641471 |
| XP_347070 | -1                 |
| XP_347072 | 0.9652599179594015 |
| XP_347075 | 1.0647407417889043 |
| XP_347078 | -1                 |
| XP_347084 | -1                 |
| XP_347091 | -1                 |
| XP_347093 | -1                 |
| XP_347101 | 1.1325775735459673 |
| XP_347106 | -1                 |
| XP_347109 | 1.282248998817373  |
| XP_347111 | 1.5191805290157945 |
| XP_347125 | 1.344007062939056  |
| XP_347127 | 0.7734810461374724 |
| XP_347147 | 0.9235028677484753 |
| XP_347148 | 1.0428776473307297 |
| XP_347149 | -1                 |
| XP_347150 | 1.0940865929177153 |
| XP_347151 | 1.05329475878863   |
| XP_347156 | 0.9852629573382905 |
| XP_347157 | 0.9252415929561467 |

|           |                     |
|-----------|---------------------|
| XP_347164 | 2.632857307083655   |
| XP_347167 | -1                  |
| XP_347168 | 0.9518303823528322  |
| XP_347169 | 1.8511138431422862  |
| XP_347170 | 0.9178257082952515  |
| XP_347171 | 1.1961944515474825  |
| XP_347172 | 0.5284907105689577  |
| XP_347175 | 0.9492224625784371  |
| XP_347177 | 1.0532246917960915  |
| XP_347180 | 1.2836964952580383  |
| XP_347182 | 1.2365043595748542  |
| XP_347183 | 4.307548273312038   |
| XP_347184 | 2.344734463938124   |
| XP_347189 | 0.8217167933107983  |
| XP_347193 | 2.6139646617582426  |
| XP_347194 | 2.893047782279892   |
| XP_347195 | 0.5344122997821151  |
| XP_347197 | 1.196992437363948   |
| XP_347199 | 2.8371001441974415  |
| XP_347203 | -1                  |
| XP_347210 | 1.8799959777566402  |
| XP_347211 | 1.2545582978327756  |
| XP_347213 | -1                  |
| XP_347215 | 0.7887102134299218  |
| XP_347216 | 0.7998256077863024  |
| XP_347217 | -1                  |
| XP_347218 | 0.45125770072699806 |
| XP_347223 | 1.2994074651594587  |
| XP_347224 | 1.1148438705874437  |
| XP_347231 | -1                  |
| XP_347234 | 0.6497125502416731  |
| XP_347245 | 0.6526535594971609  |
| XP_347246 | -1                  |
| XP_347254 | 1.0259650300025902  |
| XP_347264 | 1.055534685714824   |
| XP_347265 | 1.1050661859509119  |
| XP_347268 | 0.9616122241178231  |
| XP_347270 | 0.7612146288901677  |
| XP_347276 | 1.005155459450785   |
| XP_347278 | 1.080142026781113   |
| XP_347281 | -1                  |
| XP_347283 | 1.1198652202546493  |
| XP_347289 | 0.5736114079921731  |
| XP_347290 | -1                  |
| XP_347291 | -1                  |
| XP_347292 | 1.1354946066411638  |
| XP_347296 | 0.8988922221243274  |
| XP_347305 | 0.856105044585011   |
| XP_347306 | 1.0126498420739793  |
| XP_347310 | 1.0566468779799867  |
| XP_347313 | 1.7518318246832305  |
| XP_347317 | 0.8713476998221653  |
| XP_347326 | 0.76583476143884    |
| XP_347327 | 0.9275354377437434  |
| XP_347328 | -1                  |
| XP_347330 | -1                  |
| XP_347333 | 0.6062561145701256  |
| XP_347335 | 0.8889361254644426  |
| XP_347336 | 1.478057366408868   |
| XP_347338 | -1                  |
| XP_347339 | 1.056251772442779   |
| XP_347340 | 1.8996499525495423  |

|           |                    |
|-----------|--------------------|
| XP_347343 | 0.9860898517241122 |
| XP_347381 | 1.1806267204247811 |
| XP_347384 | 1.0628567446714932 |
